# Supplementary material for: Integrated Stress Response Signatures Drive Monocyte Dysfunction in GBA1- and LRRK2-Linked Parkinson’s Disease
Source: Research Square preprint supplement (doi:10.21203/rs.3.rs-8615050/v1), 2026-02-16

Western blot bands from freshly isolated (non-cultured) monocytes:

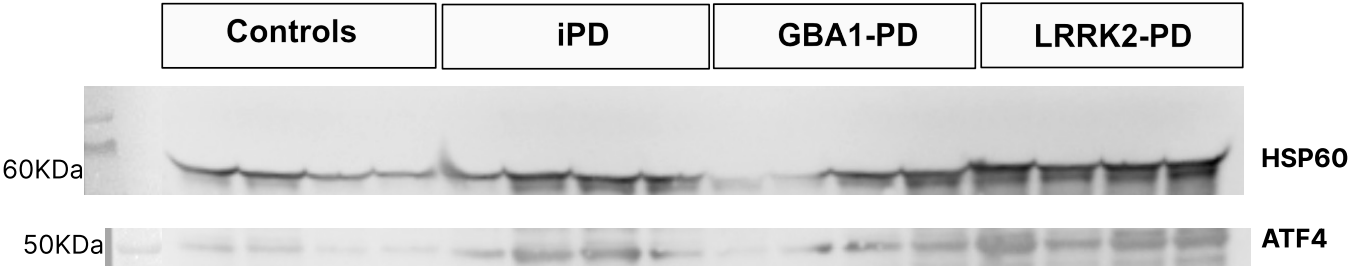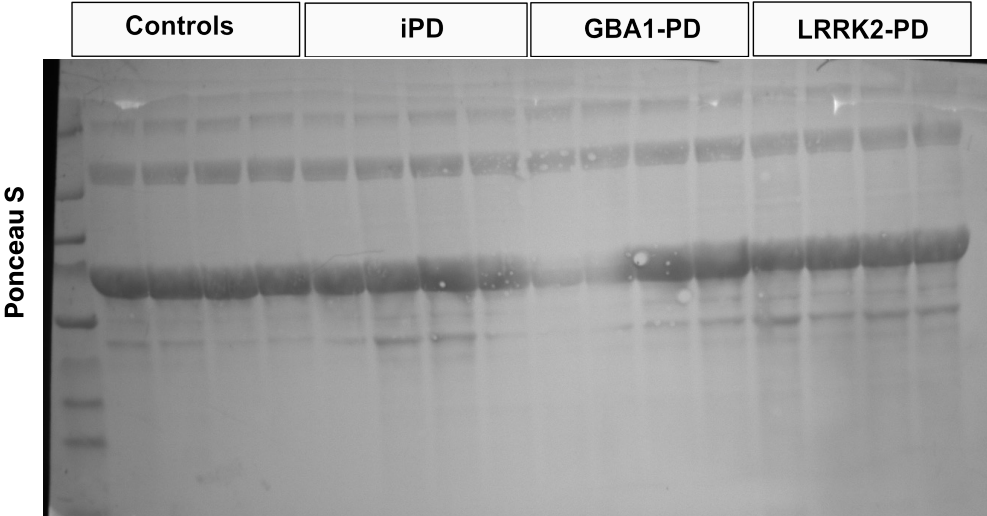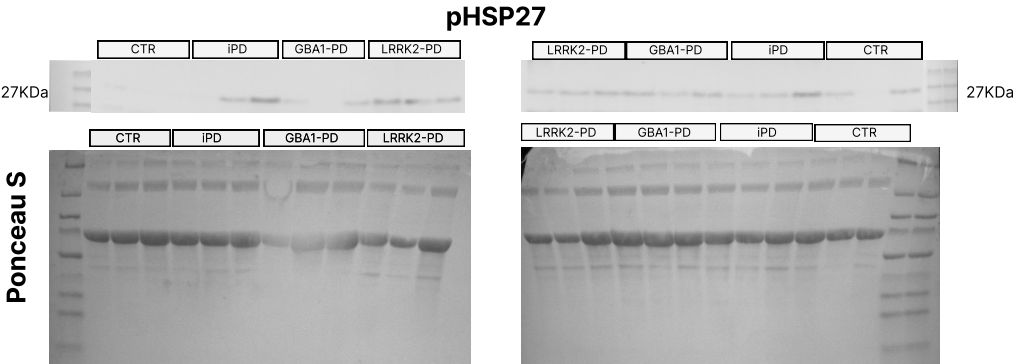

**Western blot bands from Patient monocyte-derived macrophages following 40h  $\alpha$ -synuclein pre-formed fibrils phagocytosis:**

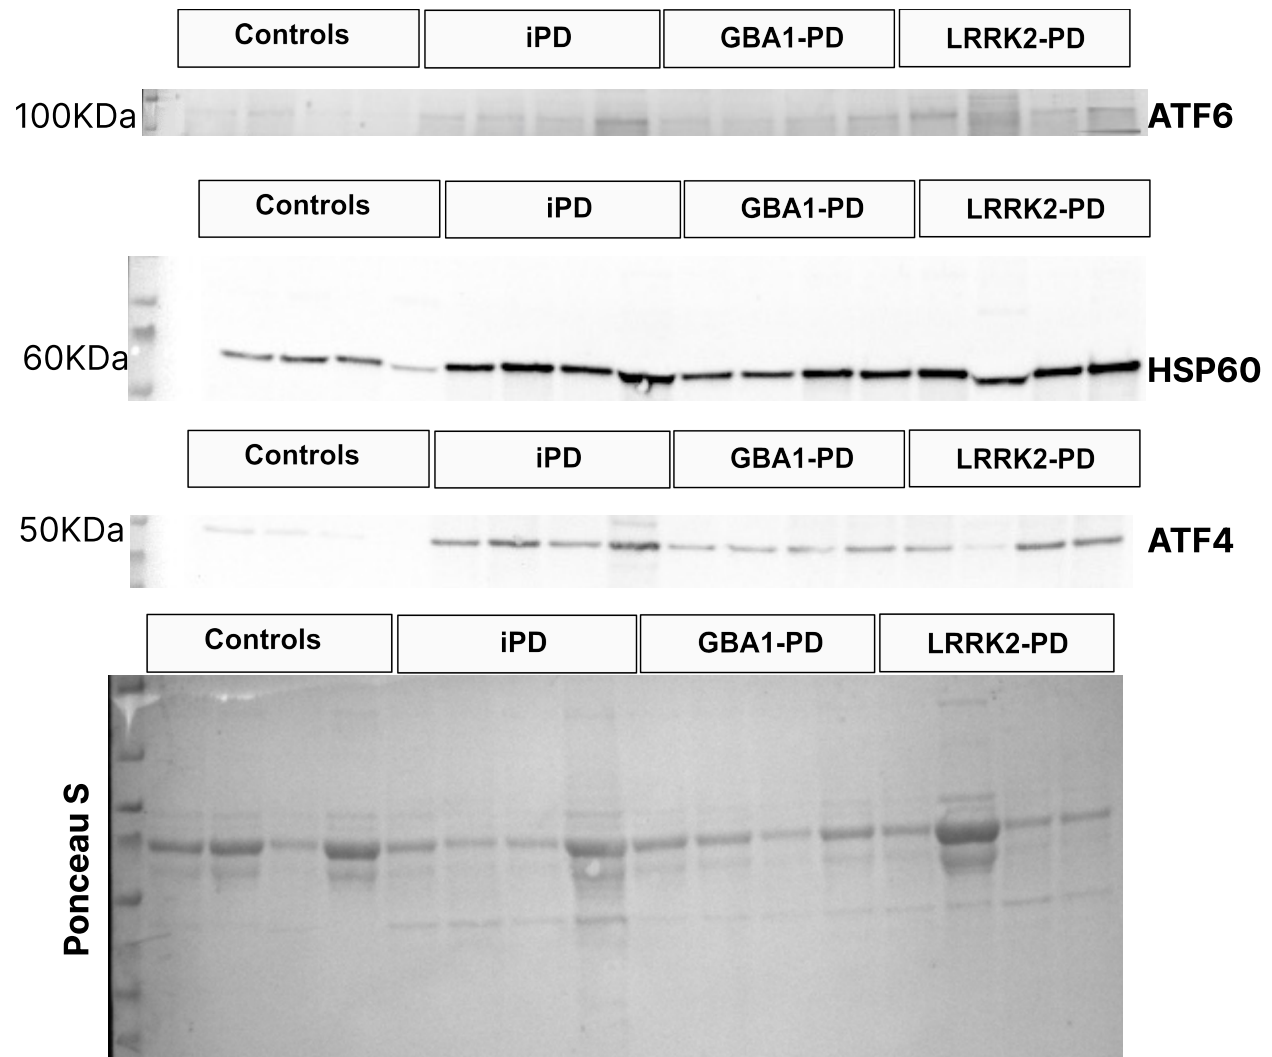

Supplement: Supplementary file 1 [file 4fcd0a6cc61348d513e3dbe7.pdf]
