# Supplementary material for: Integrated Stress Response Signatures Drive Monocyte Dysfunction in GBA1- and LRRK2-Linked Parkinson’s Disease
Source: Research Square preprint supplement (doi:10.21203/rs.3.rs-8615050/v1), 2026-02-16
Supplement: Supplementary file 1 [file 2772fc4a42d751a4107d8778.xlsx]

## Sheet: README
Section	Description
METHOD	Individual subject-level derivatives from GAM-fitted trajectories (scaled fluorescence ×10^-6 A.U.)
Key_Point	Each subject has unique smoothed trajectory and rate of change; covariates adjusted in-model; fluorescence scaled.
GAM	GAM model with subject-specific random effects + covariates (scaled response)
LMER	Linear mixed-effects model for overall slopes + covariates (scaled response)
Tests	Wilcoxon tests on individual subject rates (scaled dF/dt)
Derivatives	Subject-specific instantaneous rates (smoothed, scaled dF/dt, ×10^-6 A.U./h)
Fitted	Subject-specific fitted fluorescence values (smoothed, covariate-adjusted, scaled ×10^-6 A.U.)
Plot_Type	Use_This_Sheet	What_It_Tests	Interpretation
Fluorescence Trajectories (scaled)	LMER_Fixed	Group×time interactions (β coefficients) in scaled fluorescence, covariate-adjusted	Do groups accumulate fluorescence at different linear rates (after covariate adjustment, in scaled units)?
Fluorescence Trajectories (scaled)	LMER_Slope_Pairs	Direct pairwise slope comparisons in scaled units	How much do slopes differ between specific group pairs (scaled fluorescence per hour)?
Rate Changes (Derivatives, scaled)	Wilcoxon_Subjects	Overall subject-level rate differences between groups (scaled dF/dt)	Do subjects have different mean rates across entire experiment (scaled dF/dt)?
Rate Changes (Derivatives, scaled)	Wilcoxon_Timepoints	Time-point-specific rate differences (scaled dF/dt)	At which specific times do rates differ (scaled dF/dt)?
Subject Boxplots (mean scaled dF/dt)	Wilcoxon_Subjects	Same as Wilcoxon_Subjects (visual representation, scaled dF/dt)	Distribution of subject-level mean rates per group (scaled dF/dt)

## Sheet: Data_Summary
MYELIN
group	n_subjects
Control	20
GBA_PD	24
iPD	21
LRRK2_PD	21
SYNAPTOSOMES
group	n_subjects
Control	21
GBA_PD	25
iPD	20
LRRK2_PD	21
PFF
group	n_subjects
CTR	6
GBA_PD	6
iPD	6
LRRK2_PD	5

## Sheet: Covariate_Screening
MYELIN
term	estimate	std.error	statistic	p.value
(Intercept)	11.46	1.73433	6.60772	4.95858e-11
time_elapsed_hours	0.53097	0.0277903	19.1063	4.9867e-75
groupGBA_PD	-4.22803	0.721728	-5.85821	5.43672e-09
groupiPD	-4.215	0.72375	-5.82384	6.6601e-09
groupLRRK2_PD	-8.90477	0.734055	-12.1309	9.30473e-33
age_at_draw	0.104895	0.0206349	5.0834	4.0437e-07
clinicNYUMD	8.81371	1.12585	7.82848	7.84803e-15
weeks_cryo	0.02873	0.00265595	10.8172	1.46344e-26
ancestryNon-Jewish	-10.557	0.889857	-11.8637	1.90027e-31
ancestrySephardic Jewish	-20.9379	2.04951	-10.216	6.21958e-24
sexMale	0.86208	0.438325	1.96676	0.0493452
assay_date_numeric	-0.0318719	0.00100199	-31.8087	7.55263e-181
SYNAPTOSOMES
term	estimate	std.error	statistic	p.value
(Intercept)	42.7928	4.24554	10.0795	2.32405e-23
time_elapsed_hours	0.832008	0.0675612	12.3149	1.09518e-33
groupGBA_PD	7.48031	1.76281	4.2434	2.29845e-05
groupiPD	-2.53028	1.80722	-1.4001	0.161633
groupLRRK2_PD	8.04927	1.7958	4.48227	7.78756e-06
age_at_draw	-0.115002	0.0508946	-2.25961	0.0239486
clinicNYUMD	4.43342	2.75647	1.60837	0.107906
weeks_cryo	-0.0288872	0.00645045	-4.47832	7.93153e-06
ancestryNon-Jewish	-4.01422	2.17281	-1.84747	0.0648207
ancestrySephardic Jewish	-17.615	4.99854	-3.52402	0.000434248
sexMale	1.64251	1.0625	1.54589	0.122283
assay_date_numeric	-0.0528089	0.00244345	-21.6124	1.33511e-93
PFF
term	estimate	std.error	statistic	p.value
(Intercept)	-1336.15	242.718	-5.50494	4.80519e-08
time_elapsed_hours	0.0845617	0.012082	6.99899	5.0039e-12
groupGBA_PD	-7.95249	0.500426	-15.8915	2.29986e-50
groupiPD	-8.2253	0.539291	-15.252	6.15178e-47
groupLRRK2_PD	-6.02774	0.513494	-11.7387	9.99041e-30
sexMale	-4.11725	0.31585	-13.0355	9.87394e-36
age_at_draw	-0.224076	0.0189931	-11.7978	5.44189e-30
weeks_cryo	3.42997	0.61207	5.60388	2.77862e-08
ancestryNon-Jewish	0.314793	0.859832	0.36611	0.714368
plate1	2.08219	0.337043	6.17782	9.79397e-10
date_of_draw_numeric	0.494845	0.0874718	5.65719	2.06115e-08

## Sheet: Covariate_Fit
MYELIN
r.squared	adj.r.squared	sigma	statistic	p.value	df	logLik	AIC	BIC	deviance	df.residual	nobs
0.515396	0.512798	8.7396	198.398	0	11	-7397.14	14820.3	14893.5	156733	2052	2064
SYNAPTOSOMES
r.squared	adj.r.squared	sigma	statistic	p.value	df	logLik	AIC	BIC	deviance	df.residual	nobs
0.295537	0.291805	21.3701	79.1751	3.61489e-149	11	-9350.16	18726.3	18799.7	948066	2076	2088
PFF
r.squared	adj.r.squared	sigma	statistic	p.value	df	logLik	AIC	BIC	deviance	df.residual	nobs
0.458532	0.452576	4.23025	76.9771	6.57888e-114	10	-2626.77	5277.54	5335.43	16266.5	909	920

## Sheet: GAM_Parametric
GAM PARAMETRIC									GAM SMOOTHS
MYEIN
term	Estimate	Std. Error	t value	Pr(>|t|)	p.value				term	edf	Ref.df	F	p-value	p.value
(Intercept)	18.063	7.6172	2.37134	0.0178386	0.01784				s(time_elapsed_hours):groupControl	8.00622	8.65027	13.4881	0	<1e-10
groupGBA_PD	-4.89678	3.32221	-1.47395	0.140686	0.14069				s(time_elapsed_hours):groupGBA_PD	8.06711	8.68248	15.9903	0	<1e-10
groupiPD	-5.2128	3.33714	-1.56206	0.118468	0.11847				s(time_elapsed_hours):groupiPD	8.22224	8.75896	15.6858	0	<1e-10
groupLRRK2_PD	-9.80697	3.3818	-2.89992	0.00378223	0.00378				s(time_elapsed_hours):groupLRRK2_PD	7.00259	7.97188	7.28193	0	<1e-10
age_at_draw	0.0863955	0.0922285	0.936755	0.349022	0.34902				s(time_elapsed_hours,sample_id_factor)	381.599	415	438.149	0	<1e-10
clinicNYUMD	4.69274	5.03204	0.932572	0.351178	0.35118
weeks_cryo	0.0235238	0.0118709	1.98165	0.0476857	0.04769
ancestryNon-Jewish	-8.25005	3.97725	-2.07431	0.0382064	0.03821
ancestrySephardic Jewish	-16.8399	9.16038	-1.83834	0.0661928	0.06619
sexMale	1.34635	1.95911	0.687226	0.492037	0.49204
assay_date_numeric	-0.0244563	0.00447842	-5.46093	5.4637e-08	5.46e-08
SYNAPTOSOMES
term	Estimate	Std. Error	t value	Pr(>|t|)	p.value				term	edf	Ref.df	F	p-value	p.value
(Intercept)	58.9975	14.5982	4.04142	5.55524e-05	5.56e-05				s(time_elapsed_hours):groupControl	7.86147	8.57833	11.3295	0	< 1e-10
groupGBA_PD	6.93778	6.11786	1.13402	0.256949	0.257				s(time_elapsed_hours):groupGBA_PD	7.74145	8.5065	9.39929	0	< 1e-10
groupiPD	-3.56807	5.91786	-0.602932	0.546636	0.547				s(time_elapsed_hours):groupiPD	6.42844	7.49474	3.94394	0.000216071	0.000216
groupLRRK2_PD	8.11486	6.29678	1.28873	0.197671	0.198				s(time_elapsed_hours):groupLRRK2_PD	7.42261	8.29619	6.86209	0	< 1e-10
age_at_draw	-0.148764	0.187539	-0.793243	0.42775	0.428				s(time_elapsed_hours,sample_id_factor)	386.333	422	519.849	0	< 1e-10
weeks_cryo	-0.0321412	0.0234275	-1.37194	0.170267	0.170
ancestryNon-Jewish	-1.50281	6.46999	-0.232274	0.816354	0.816
ancestrySephardic Jewish	-13.7362	17.3529	-0.791579	0.428719	0.429
assay_date_numeric	-0.0566281	0.00915243	-6.18723	7.69288e-10	7.69e-10
PFF
term	Estimate	Std. Error	t value	Pr(>|t|)					term	edf	Ref.df	F	p-value
(Intercept)	901.496	1175	0.767233	0.44317					s(time_elapsed_hours):groupCTR	8.76692	8.94801	44.4147	0
groupGBA_PD	-4.38561	3.51454	-1.24785	0.212453					s(time_elapsed_hours):groupGBA_PD	8.12222	8.69039	7.31234	2.83157e-07
groupiPD	-5.90693	3.66531	-1.61157	0.10745					s(time_elapsed_hours):groupiPD	6.32507	7.37722	3.93748	0.000407741
groupLRRK2_PD	-7.30514	3.47583	-2.1017	0.0358929					s(time_elapsed_hours):groupLRRK2_PD	1.00086	1.00137	0.442798	0.506125
sexMale	-1.78959	1.63099	-1.09725	0.272865					s(time_elapsed_hours,sample_id_factor)	89.2553	102	342.936	0
age_at_draw	-0.0667432	0.0928943	-0.718485	0.472669
weeks_cryo	-2.23711	2.96416	-0.75472	0.45064
plate1	-1.54844	1.74241	-0.888678	0.374444
date_of_draw_numeric	-0.318931	0.423681	-0.752761	0.451816

## Sheet: LMER_Fixed
	LMER
	MYELIN									PAIR-WISE SLOPE COMPARISONS
effect	term	estimate	std.error	statistic	df	p.value	conf.low	conf.high		contrast	estimate	SE	df	t.ratio	p.value
fixed	(Intercept)	12.3011	7.6971	1.59815	75.3411	0.11420	-3.03114	27.6334		Control - GBA_PD	-0.157639	0.0396938	1974	-3.97138	0.00043
fixed	groupGBA_PD	-6.19852	3.30311	-1.87657	78.5011	0.06429	-12.7739	0.376814		Control - iPD	-0.0892461	0.0409623	1974	-2.17873	0.129497
fixed	groupiPD	-5.33058	3.31457	-1.60822	78.7101	0.11179	-11.9284	1.26729		Control - LRRK2_PD	-0.00617822	0.0409623	1974	-0.150827	0.998778
fixed	groupLRRK2_PD	-8.98199	3.36065	-2.6727	78.6055	0.00915	-15.6717	-2.29227		GBA_PD - iPD	0.0683931	0.039175	1974	1.74584	0.300232
fixed	time_elapsed_hours	0.463677	0.0293158	15.8166	1974	< 1e-10	0.406183	0.52117		GBA_PD - LRRK2_PD	0.151461	0.039175	1974	3.86627	0.000659
fixed	age_at_draw	0.104895	0.0933677	1.12347	75	0.26482	-0.0811025	0.290893		iPD - LRRK2_PD	0.0830678	0.0404597	1974	2.0531	0.169125
fixed	clinicNYUMD	8.81371	5.09419	1.73015	75	0.08772	-1.33445	18.9619
fixed	weeks_cryo	0.02873	0.0120175	2.39068	75	0.01933	0.00478988	0.05267
fixed	ancestryNon-Jewish	-10.557	4.02638	-2.62195	75	0.01058	-18.5779	-2.53602
fixed	ancestrySephardic Jewish	-20.9379	9.27352	-2.25781	75	0.02687	-39.4117	-2.46407
fixed	sexMale	0.86208	1.98331	0.434668	75	0.66505	-3.08887	4.81303
fixed	assay_date_numeric	-0.0318719	0.00453374	-7.02993	75	8.16e-10	-0.0409035	-0.0228402
fixed	groupGBA_PD:time_elapsed_hours	0.157639	0.0396938	3.97138	1974	7.40e-05	0.0797929	0.235485
fixed	groupiPD:time_elapsed_hours	0.0892461	0.0409623	2.17873	1974	0.02947	0.00891209	0.16958
fixed	groupLRRK2_PD:time_elapsed_hours	0.00617822	0.0409623	0.150827	1974	0.88013	-0.0741557	0.0865122
	SYNAPTOSOMES
effect	term	estimate	std.error	statistic	df	p.value	conf.low	conf.high		contrast	estimate	SE	df	t.ratio	p.value
fixed	(Intercept)	48.8441	17.7677	2.74904	78.2897	0.00742	13.4734	84.2148		Control - GBA_PD	-0.487004	0.0829843	1997	-5.86863	3.08e-08
fixed	groupGBA_PD	0.336783	7.41115	0.0454428	81.147	0.96387	-14.4087	15.0822		Control - iPD	0.11613	0.0875919	1997	1.32581	0.547
fixed	groupiPD	-2.55356	7.16172	-0.356556	81.7763	0.72234	-16.8011	11.694		Control - LRRK2_PD	-0.499772	0.0865171	1997	-5.77657	5.29e-08
fixed	groupLRRK2_PD	1.17543	7.62685	0.154117	81.2324	0.87790	-13.999	16.3498		GBA_PD - iPD	0.603135	0.0841042	1997	7.17128	< 1e-10
fixed	time_elapsed_hours	0.598126	0.0611768	9.77701	1997	< 1e-10	0.478149	0.718103		GBA_PD - LRRK2_PD	-0.0127677	0.0829843	1997	-0.153857	0.999
fixed	age_at_draw	-0.140207	0.22837	-0.613947	78	0.54104	-0.594857	0.314443		iPD - LRRK2_PD	-0.615902	0.0875919	1997	-7.0315	< 1e-10
fixed	weeks_cryo	-0.0275418	0.0285281	-0.965427	78	0.33731	-0.0843369	0.0292533
fixed	ancestryNon-Jewish	-1.80918	7.87862	-0.229631	78	0.81898	-17.4943	13.876
fixed	ancestrySephardic Jewish	-13.7266	21.1309	-0.6496	78	0.51786	-55.7951	28.3418
fixed	assay_date_numeric	-0.05225	0.0111451	-4.68818	78	1.15e-05	-0.0744381	-0.0300619
fixed	groupGBA_PD:time_elapsed_hours	0.487004	0.0829843	5.86863	1997	5.13e-09	0.32426	0.649749
fixed	groupiPD:time_elapsed_hours	-0.11613	0.0875919	-1.32581	1997	0.18505	-0.287911	0.0556509
fixed	groupLRRK2_PD:time_elapsed_hours	0.499772	0.0865171	5.77657	1997	8.82e-09	0.330099	0.669445
	PFF
effect	term	estimate	std.error	statistic	df	p.value	conf.low	conf.high		contrast	estimate	SE	df	t.ratio	p.value
fixed	(Intercept)	-1305.98	1665.6	-0.784091	14.196	0.445873	-4873.7	2261.75		CTR - GBA_PD	0.0676155	0.013532	893	4.9967	4.18192e-06
fixed	groupGBA_PD	-6.56184	3.67815	-1.784	14.1697	0.0958453	-14.4418	1.31816		CTR - iPD	0.0459795	0.013532	893	3.39783	0.00394933
fixed	groupiPD	-7.2792	3.96283	-1.83687	14.1386	0.0873392	-15.7708	1.21243		CTR - LRRK2_PD	0.111466	0.0141925	893	7.85383	0
fixed	groupLRRK2_PD	-3.66532	3.44324	-1.0645	14.2026	0.304867	-11.0405	3.70982		GBA_PD - iPD	-0.021636	0.013532	893	-1.59887	0.379751
fixed	time_elapsed_hours	0.138427	0.00956859	14.4668	893.001	9.02654e-43	0.119647	0.157206		GBA_PD - LRRK2_PD	0.0438501	0.0141925	893	3.08967	0.0110964
fixed	sexMale	-4.11078	2.31198	-1.77803	13.9998	0.0971166	-9.06949	0.847936		iPD - LRRK2_PD	0.0654861	0.0141925	893	4.61413	2.68086e-05
fixed	age_at_draw	-0.226337	0.131681	-1.71883	14.0042	0.107662	-0.508757	0.0560825
fixed	weeks_cryo	3.35132	4.2018	0.797591	14.196	0.438246	-5.64899	12.3516
fixed	plate1	2.08581	2.46992	0.844482	14.0305	0.412569	-3.21057	7.38219
fixed	date_of_draw_numeric	0.483617	0.600583	0.805246	14.196	0.433958	-0.802839	1.77007
fixed	groupGBA_PD:time_elapsed_hours	-0.0676155	0.013532	-4.9967	893.001	7.01652e-07	-0.0941738	-0.0410572
fixed	groupiPD:time_elapsed_hours	-0.0459795	0.013532	-3.39783	893.001	0.00070926	-0.0725378	-0.0194212
fixed	groupLRRK2_PD:time_elapsed_hours	-0.111466	0.0141925	-7.85383	893.001	1.15504e-14	-0.13932	-0.0836111

## Sheet: Wilcoxon_Subjects
Comparison of overall subject-level rate differences between groups (scaled dF/dt)
MYELIN
.y.	group1	group2	n1	n2	statistic	p	p.adj	p.adj.signif
mean_deriv	Control	GBA_PD	20	24	216	0.583	0.874	ns
mean_deriv	Control	iPD	20	21	205	0.908	0.908	ns
mean_deriv	Control	LRRK2_PD	20	21	246	0.358	0.716	ns
mean_deriv	GBA_PD	iPD	24	21	266	0.761	0.908	ns
mean_deriv	GBA_PD	LRRK2_PD	24	21	310	0.193	0.716	ns
mean_deriv	iPD	LRRK2_PD	21	21	266	0.261	0.716	ns
SYNAPTOSOMES
.y.	group1	group2	n1	n2	statistic	p	p.adj	p.adj.signif
mean_deriv	Control	GBA_PD	21	25	248	0.760	0.760	ns
mean_deriv	Control	iPD	21	20	267	0.142	0.426	ns
mean_deriv	Control	LRRK2_PD	21	21	245	0.550	0.738	ns
mean_deriv	GBA_PD	iPD	25	20	323	0.098	0.426	ns
mean_deriv	GBA_PD	LRRK2_PD	25	21	290	0.555	0.738	ns
mean_deriv	iPD	LRRK2_PD	20	21	190	0.615	0.738	ns
PFF
.y.	group1	group2	n1	n2	statistic	p	p.adj	p.adj.signif
mean_deriv	CTR	GBA_PD	6	6	29	0.093	0.14	ns
mean_deriv	CTR	iPD	6	6	30	0.065	0.13	ns
mean_deriv	CTR	LRRK2_PD	6	5	30	0.004	0.026	*
mean_deriv	GBA_PD	iPD	6	6	17	0.937	0.937	ns
mean_deriv	GBA_PD	LRRK2_PD	6	5	24	0.126	0.151	ns
mean_deriv	iPD	LRRK2_PD	6	5	28	0.017	0.052	ns

## Sheet: Wilcoxon_Timepoints
Time-point-specific rate differences (scaled dF/dt)	MYELIN	time_elapsed_hours	.y.	group1	group2	n1	n2	statistic	p	p.adj	p.adj.signif		SYNAPTOSOMES	time_elapsed_hours	.y.	group1	group2	n1	n2	statistic	p	p.adj	p.adj.signif		PFF	time_elapsed_hours	.y.	group1	group2	n1	n2	statistic	p	p.adj	p.adj.signif
		1	deriv	Control	GBA_PD	20	24	232	0.861	0.861	ns			1	deriv	Control	GBA_PD	21	25	288	0.585	0.702	ns			1	deriv	CTR	GBA_PD	6	6	34	0.009	0.01	*
		1	deriv	Control	iPD	20	21	174	0.358	0.537	ns			1	deriv	Control	iPD	21	20	276	0.088	0.526	ns			1	deriv	CTR	iPD	6	6	36	0.002	0.006	**
		1	deriv	Control	LRRK2_PD	20	21	274	0.098	0.196	ns			1	deriv	Control	LRRK2_PD	21	21	257	0.369	0.579	ns			1	deriv	CTR	LRRK2_PD	6	5	30	0.004	0.006	**
		1	deriv	GBA_PD	iPD	24	21	229	0.612	0.734	ns			1	deriv	GBA_PD	iPD	25	20	304	0.224	0.579	ns			1	deriv	GBA_PD	iPD	6	6	23	0.485	0.485	ns
		1	deriv	GBA_PD	LRRK2_PD	24	21	341	0.043	0.130	ns			1	deriv	GBA_PD	LRRK2_PD	25	21	270	0.879	0.879	ns			1	deriv	GBA_PD	LRRK2_PD	6	5	30	0.004	0.006	**
		1	deriv	iPD	LRRK2_PD	21	21	305	0.034	0.130	ns			1	deriv	iPD	LRRK2_PD	20	21	176	0.386	0.579	ns			1	deriv	iPD	LRRK2_PD	6	5	30	0.004	0.006	**
		2	deriv	Control	GBA_PD	20	24	234	0.898	0.898	ns			2	deriv	Control	GBA_PD	21	25	284	0.646	0.775	ns			2	deriv	CTR	GBA_PD	6	6	34	0.009	0.01	*
		2	deriv	Control	iPD	20	21	182	0.477	0.716	ns			2	deriv	Control	iPD	21	20	272	0.109	0.654	ns			2	deriv	CTR	iPD	6	6	36	0.002	0.006	**
		2	deriv	Control	LRRK2_PD	20	21	268	0.135	0.270	ns			2	deriv	Control	LRRK2_PD	21	21	255	0.396	0.716	ns			2	deriv	CTR	LRRK2_PD	6	5	30	0.004	0.006	**
		2	deriv	GBA_PD	iPD	24	21	236	0.727	0.872	ns			2	deriv	GBA_PD	iPD	25	20	304	0.224	0.672	ns			2	deriv	GBA_PD	iPD	6	6	23	0.485	0.485	ns
		2	deriv	GBA_PD	LRRK2_PD	24	21	335	0.060	0.180	ns			2	deriv	GBA_PD	LRRK2_PD	25	21	275	0.793	0.793	ns			2	deriv	GBA_PD	LRRK2_PD	6	5	30	0.004	0.006	**
		2	deriv	iPD	LRRK2_PD	21	21	299	0.049	0.180	ns			2	deriv	iPD	LRRK2_PD	20	21	182	0.477	0.716	ns			2	deriv	iPD	LRRK2_PD	6	5	30	0.004	0.006	**
		3	deriv	Control	GBA_PD	20	24	238	0.972	0.973	ns			3	deriv	Control	GBA_PD	21	25	268	0.913	0.913	ns			3	deriv	CTR	GBA_PD	6	6	33	0.015	0.018	*
		3	deriv	Control	iPD	20	21	212	0.969	0.973	ns			3	deriv	Control	iPD	21	20	251	0.294	0.874	ns			3	deriv	CTR	iPD	6	6	36	0.002	0.009	**
		3	deriv	Control	LRRK2_PD	20	21	262	0.181	0.362	ns			3	deriv	Control	LRRK2_PD	21	21	246	0.533	0.874	ns			3	deriv	CTR	LRRK2_PD	6	5	30	0.004	0.009	**
		3	deriv	GBA_PD	iPD	24	21	254	0.973	0.973	ns			3	deriv	GBA_PD	iPD	25	20	298	0.281	0.874	ns			3	deriv	GBA_PD	iPD	6	6	23	0.485	0.485	ns
		3	deriv	GBA_PD	LRRK2_PD	24	21	317	0.143	0.362	ns			3	deriv	GBA_PD	LRRK2_PD	25	21	284	0.646	0.874	ns			3	deriv	GBA_PD	LRRK2_PD	6	5	29	0.009	0.013	*
		3	deriv	iPD	LRRK2_PD	21	21	277	0.160	0.362	ns			3	deriv	iPD	LRRK2_PD	20	21	196	0.728	0.874	ns			3	deriv	iPD	LRRK2_PD	6	5	30	0.004	0.009	**
		4	deriv	Control	GBA_PD	20	24	236	0.935	0.935	ns			4	deriv	Control	GBA_PD	21	25	246	0.727	0.921	ns			4	deriv	CTR	GBA_PD	6	6	32	0.026	0.039	*
		4	deriv	Control	iPD	20	21	229	0.633	0.935	ns			4	deriv	Control	iPD	21	20	226	0.689	0.921	ns			4	deriv	CTR	iPD	6	6	34	0.009	0.017	*
		4	deriv	Control	LRRK2_PD	20	21	245	0.372	0.935	ns			4	deriv	Control	LRRK2_PD	21	21	225	0.921	0.921	ns			4	deriv	CTR	LRRK2_PD	6	5	30	0.004	0.013	*
		4	deriv	GBA_PD	iPD	24	21	273	0.644	0.935	ns			4	deriv	GBA_PD	iPD	25	20	295	0.313	0.921	ns			4	deriv	GBA_PD	iPD	6	6	21	0.699	0.699	ns
		4	deriv	GBA_PD	LRRK2_PD	24	21	294	0.349	0.935	ns			4	deriv	GBA_PD	LRRK2_PD	25	21	291	0.540	0.921	ns			4	deriv	GBA_PD	LRRK2_PD	6	5	26	0.052	0.062	ns
		4	deriv	iPD	LRRK2_PD	21	21	229	0.842	0.935	ns			4	deriv	iPD	LRRK2_PD	20	21	203	0.867	0.921	ns			4	deriv	iPD	LRRK2_PD	6	5	30	0.004	0.013	*
		5	deriv	Control	GBA_PD	20	24	232	0.861	0.861	ns			5	deriv	Control	GBA_PD	21	25	219	0.346	0.968	ns			5	deriv	CTR	GBA_PD	6	6	30	0.065	0.097	ns
		5	deriv	Control	iPD	20	21	234	0.544	0.861	ns			5	deriv	Control	iPD	21	20	203	0.867	1.000	ns			5	deriv	CTR	iPD	6	6	30	0.065	0.097	ns
		5	deriv	Control	LRRK2_PD	20	21	218	0.847	0.861	ns			5	deriv	Control	LRRK2_PD	21	21	204	0.690	1.000	ns			5	deriv	CTR	LRRK2_PD	6	5	30	0.004	0.026	*
		5	deriv	GBA_PD	iPD	24	21	289	0.410	0.861	ns			5	deriv	GBA_PD	iPD	25	20	293	0.335	0.968	ns			5	deriv	GBA_PD	iPD	6	6	17	0.937	0.937	ns
		5	deriv	GBA_PD	LRRK2_PD	24	21	279	0.550	0.861	ns			5	deriv	GBA_PD	LRRK2_PD	25	21	295	0.484	0.968	ns			5	deriv	GBA_PD	LRRK2_PD	6	5	25	0.082	0.099	ns
		5	deriv	iPD	LRRK2_PD	21	21	212	0.842	0.861	ns			5	deriv	iPD	LRRK2_PD	20	21	210	1.000	1.000	ns			5	deriv	iPD	LRRK2_PD	6	5	28	0.017	0.052	ns
		6	deriv	Control	GBA_PD	20	24	228	0.788	0.98	ns			6	deriv	Control	GBA_PD	21	25	208	0.236	0.775	ns			6	deriv	CTR	GBA_PD	6	6	25	0.31	0.591	ns
		6	deriv	Control	iPD	20	21	227	0.670	0.98	ns			6	deriv	Control	iPD	21	20	191	0.633	0.775	ns			6	deriv	CTR	iPD	6	6	21	0.699	0.792	ns
		6	deriv	Control	LRRK2_PD	20	21	216	0.887	0.98	ns			6	deriv	Control	LRRK2_PD	21	21	190	0.454	0.775	ns			6	deriv	CTR	LRRK2_PD	6	5	25	0.082	0.247	ns
		6	deriv	GBA_PD	iPD	24	21	287	0.436	0.98	ns			6	deriv	GBA_PD	iPD	25	20	291	0.359	0.775	ns			6	deriv	GBA_PD	iPD	6	6	12	0.394	0.591	ns
		6	deriv	GBA_PD	LRRK2_PD	24	21	281	0.520	0.98	ns			6	deriv	GBA_PD	LRRK2_PD	25	21	284	0.646	0.775	ns			6	deriv	GBA_PD	LRRK2_PD	6	5	17	0.792	0.792	ns
		6	deriv	iPD	LRRK2_PD	21	21	219	0.980	0.98	ns			6	deriv	iPD	LRRK2_PD	20	21	204	0.887	0.887	ns			6	deriv	iPD	LRRK2_PD	6	5	26	0.052	0.247	ns
		7	deriv	Control	GBA_PD	20	24	222	0.683	0.908	ns			7	deriv	Control	GBA_PD	21	25	214	0.293	0.767	ns			7	deriv	CTR	GBA_PD	6	6	19	0.937	0.937	ns
		7	deriv	Control	iPD	20	21	194	0.689	0.908	ns			7	deriv	Control	iPD	21	20	189	0.597	0.767	ns			7	deriv	CTR	iPD	6	6	14	0.589	0.883	ns
		7	deriv	Control	LRRK2_PD	20	21	215	0.908	0.908	ns			7	deriv	Control	LRRK2_PD	21	21	185	0.382	0.767	ns			7	deriv	CTR	LRRK2_PD	6	5	13	0.792	0.937	ns
		7	deriv	GBA_PD	iPD	24	21	258	0.901	0.908	ns			7	deriv	GBA_PD	iPD	25	20	281	0.490	0.767	ns			7	deriv	GBA_PD	iPD	6	6	9	0.18	0.883	ns
		7	deriv	GBA_PD	LRRK2_PD	24	21	286	0.450	0.908	ns			7	deriv	GBA_PD	LRRK2_PD	25	21	277	0.760	0.767	ns			7	deriv	GBA_PD	LRRK2_PD	6	5	11	0.537	0.883	ns
		7	deriv	iPD	LRRK2_PD	21	21	248	0.501	0.908	ns			7	deriv	iPD	LRRK2_PD	20	21	198	0.767	0.767	ns			7	deriv	iPD	LRRK2_PD	6	5	21	0.329	0.883	ns
		8	deriv	Control	GBA_PD	20	24	220	0.649	0.867	ns			8	deriv	Control	GBA_PD	21	25	224	0.406	0.887	ns			8	deriv	CTR	GBA_PD	6	6	16	0.818	0.818	ns
		8	deriv	Control	iPD	20	21	162	0.218	0.750	ns			8	deriv	Control	iPD	21	20	195	0.708	0.887	ns			8	deriv	CTR	iPD	6	6	11	0.31	0.643	ns
		8	deriv	Control	LRRK2_PD	20	21	217	0.867	0.867	ns			8	deriv	Control	LRRK2_PD	21	21	195	0.533	0.887	ns			8	deriv	CTR	LRRK2_PD	6	5	10	0.429	0.643	ns
		8	deriv	GBA_PD	iPD	24	21	241	0.813	0.867	ns			8	deriv	GBA_PD	iPD	25	20	277	0.549	0.887	ns			8	deriv	GBA_PD	iPD	6	6	9	0.18	0.643	ns
		8	deriv	GBA_PD	LRRK2_PD	24	21	286	0.450	0.867	ns			8	deriv	GBA_PD	LRRK2_PD	25	21	272	0.844	0.887	ns			8	deriv	GBA_PD	LRRK2_PD	6	5	10	0.429	0.643	ns
		8	deriv	iPD	LRRK2_PD	21	21	267	0.250	0.750	ns			8	deriv	iPD	LRRK2_PD	20	21	204	0.887	0.887	ns			8	deriv	iPD	LRRK2_PD	6	5	19	0.537	0.644	ns
		9	deriv	Control	GBA_PD	20	24	218	0.616	0.792	ns			9	deriv	Control	GBA_PD	21	25	254	0.861	1	ns			9	deriv	CTR	GBA_PD	6	6	13	0.485	0.582	ns
		9	deriv	Control	iPD	20	21	151	0.128	0.768	ns			9	deriv	Control	iPD	21	20	242	0.415	1	ns			9	deriv	CTR	iPD	6	6	10	0.24	0.582	ns
		9	deriv	Control	LRRK2_PD	20	21	192	0.651	0.792	ns			9	deriv	Control	LRRK2_PD	21	21	221	1.000	1	ns			9	deriv	CTR	LRRK2_PD	6	5	10	0.429	0.582	ns
		9	deriv	GBA_PD	iPD	24	21	243	0.848	0.848	ns			9	deriv	GBA_PD	iPD	25	20	275	0.579	1	ns			9	deriv	GBA_PD	iPD	6	6	10	0.24	0.582	ns
		9	deriv	GBA_PD	LRRK2_PD	24	21	272	0.660	0.792	ns			9	deriv	GBA_PD	LRRK2_PD	25	21	283	0.662	1	ns			9	deriv	GBA_PD	LRRK2_PD	6	5	10	0.429	0.582	ns
		9	deriv	iPD	LRRK2_PD	21	21	266	0.261	0.783	ns			9	deriv	iPD	LRRK2_PD	20	21	203	0.867	1	ns			9	deriv	iPD	LRRK2_PD	6	5	16	0.931	0.931	ns
		10	deriv	Control	GBA_PD	20	24	212	0.521	0.782	ns			10	deriv	Control	GBA_PD	21	25	257	0.913	0.913	ns			10	deriv	CTR	GBA_PD	6	6	11	0.31	0.858	ns
		10	deriv	Control	iPD	20	21	175	0.372	0.782	ns			10	deriv	Control	iPD	21	20	258	0.218	0.726	ns			10	deriv	CTR	iPD	6	6	12	0.394	0.858	ns
		10	deriv	Control	LRRK2_PD	20	21	212	0.969	0.969	ns			10	deriv	Control	LRRK2_PD	21	21	238	0.672	0.806	ns			10	deriv	CTR	LRRK2_PD	6	5	10	0.429	0.858	ns
		10	deriv	GBA_PD	iPD	24	21	257	0.919	0.969	ns			10	deriv	GBA_PD	iPD	25	20	302	0.242	0.726	ns			10	deriv	GBA_PD	iPD	6	6	19	0.937	0.937	ns
		10	deriv	GBA_PD	LRRK2_PD	24	21	284	0.477	0.782	ns			10	deriv	GBA_PD	LRRK2_PD	25	21	285	0.631	0.806	ns			10	deriv	GBA_PD	LRRK2_PD	6	5	14	0.931	0.937	ns
		10	deriv	iPD	LRRK2_PD	21	21	261	0.318	0.782	ns			10	deriv	iPD	LRRK2_PD	20	21	185	0.527	0.806	ns			10	deriv	iPD	LRRK2_PD	6	5	16	0.931	0.937	ns
		11	deriv	Control	GBA_PD	20	24	188	0.227	0.572	ns			11	deriv	Control	GBA_PD	21	25	235	0.555	0.666	ns			11	deriv	CTR	GBA_PD	6	6	14	0.589	0.95	ns
		11	deriv	Control	iPD	20	21	209	0.990	0.990	ns			11	deriv	Control	iPD	21	20	273	0.104	0.312	ns			11	deriv	CTR	iPD	6	6	14	0.589	0.95	ns
		11	deriv	Control	LRRK2_PD	20	21	238	0.477	0.572	ns			11	deriv	Control	LRRK2_PD	21	21	221	1.000	1.000	ns			11	deriv	CTR	LRRK2_PD	6	5	15	1	1	ns
		11	deriv	GBA_PD	iPD	24	21	289	0.410	0.572	ns			11	deriv	GBA_PD	iPD	25	20	349	0.023	0.140	ns			11	deriv	GBA_PD	iPD	6	6	21	0.699	0.95	ns
		11	deriv	GBA_PD	LRRK2_PD	24	21	313	0.170	0.572	ns			11	deriv	GBA_PD	LRRK2_PD	25	21	297	0.457	0.666	ns			11	deriv	GBA_PD	LRRK2_PD	6	5	22	0.247	0.95	ns
		11	deriv	iPD	LRRK2_PD	21	21	260	0.330	0.572	ns			11	deriv	iPD	LRRK2_PD	20	21	157	0.173	0.346	ns			11	deriv	iPD	LRRK2_PD	6	5	17	0.792	0.95	ns
		12	deriv	Control	GBA_PD	20	24	167	0.088	0.255	ns			12	deriv	Control	GBA_PD	21	25	211	0.264	0.396	ns			12	deriv	CTR	GBA_PD	6	6	17	0.937	0.937	ns
		12	deriv	Control	iPD	20	21	204	0.887	0.887	ns			12	deriv	Control	iPD	21	20	271	0.115	0.230	ns			12	deriv	CTR	iPD	6	6	24	0.394	0.591	ns
		12	deriv	Control	LRRK2_PD	20	21	243	0.401	0.481	ns			12	deriv	Control	LRRK2_PD	21	21	202	0.654	0.654	ns			12	deriv	CTR	LRRK2_PD	6	5	23	0.177	0.48	ns
		12	deriv	GBA_PD	iPD	24	21	313	0.170	0.255	ns			12	deriv	GBA_PD	iPD	25	20	362	0.010	0.059	ns			12	deriv	GBA_PD	iPD	6	6	26	0.24	0.48	ns
		12	deriv	GBA_PD	LRRK2_PD	24	21	327	0.090	0.255	ns			12	deriv	GBA_PD	LRRK2_PD	25	21	292	0.526	0.631	ns			12	deriv	GBA_PD	LRRK2_PD	6	5	26	0.052	0.311	ns
		12	deriv	iPD	LRRK2_PD	21	21	280	0.139	0.255	ns			12	deriv	iPD	LRRK2_PD	20	21	124	0.025	0.074	ns			12	deriv	iPD	LRRK2_PD	6	5	18	0.662	0.794	ns
		13	deriv	Control	GBA_PD	20	24	176	0.136	0.526	ns			13	deriv	Control	GBA_PD	21	25	213	0.283	0.564	ns			13	deriv	CTR	GBA_PD	6	6	20	0.818	0.818	ns
		13	deriv	Control	iPD	20	21	197	0.747	0.806	ns			13	deriv	Control	iPD	21	20	240	0.446	0.564	ns			13	deriv	CTR	iPD	6	6	29	0.093	0.186	ns
		13	deriv	Control	LRRK2_PD	20	21	220	0.806	0.806	ns			13	deriv	Control	LRRK2_PD	21	21	191	0.470	0.564	ns			13	deriv	CTR	LRRK2_PD	6	5	29	0.009	0.026	*
		13	deriv	GBA_PD	iPD	24	21	302	0.263	0.526	ns			13	deriv	GBA_PD	iPD	25	20	335	0.053	0.209	ns			13	deriv	GBA_PD	iPD	6	6	27	0.18	0.27	ns
		13	deriv	GBA_PD	LRRK2_PD	24	21	312	0.178	0.526	ns			13	deriv	GBA_PD	LRRK2_PD	25	21	286	0.615	0.615	ns			13	deriv	GBA_PD	LRRK2_PD	6	5	29	0.009	0.026	*
		13	deriv	iPD	LRRK2_PD	21	21	253	0.425	0.637	ns			13	deriv	iPD	LRRK2_PD	20	21	140	0.070	0.209	ns			13	deriv	iPD	LRRK2_PD	6	5	20	0.429	0.515	ns
		14	deriv	Control	GBA_PD	20	24	207	0.448	0.94	ns			14	deriv	Control	GBA_PD	21	25	217	0.324	0.573	ns			14	deriv	CTR	GBA_PD	6	6	23	0.485	0.485	ns
		14	deriv	Control	iPD	20	21	196	0.728	0.94	ns			14	deriv	Control	iPD	21	20	208	0.969	0.969	ns			14	deriv	CTR	iPD	6	6	27	0.18	0.27	ns
		14	deriv	Control	LRRK2_PD	20	21	181	0.461	0.94	ns			14	deriv	Control	LRRK2_PD	21	21	185	0.382	0.573	ns			14	deriv	CTR	LRRK2_PD	6	5	25	0.082	0.247	ns
		14	deriv	GBA_PD	iPD	24	21	257	0.919	0.94	ns			14	deriv	GBA_PD	iPD	25	20	302	0.242	0.573	ns			14	deriv	GBA_PD	iPD	6	6	27	0.18	0.27	ns
		14	deriv	GBA_PD	LRRK2_PD	24	21	247	0.919	0.94	ns			14	deriv	GBA_PD	LRRK2_PD	25	21	272	0.844	0.969	ns			14	deriv	GBA_PD	LRRK2_PD	6	5	28	0.017	0.104	ns
		14	deriv	iPD	LRRK2_PD	21	21	217	0.940	0.94	ns			14	deriv	iPD	LRRK2_PD	20	21	155	0.157	0.573	ns			14	deriv	iPD	LRRK2_PD	6	5	21	0.329	0.395	ns
		15	deriv	Control	GBA_PD	20	24	218	0.616	0.924	ns			15	deriv	Control	GBA_PD	21	25	202	0.188	0.360	ns			15	deriv	CTR	GBA_PD	6	6	26	0.24	0.36	ns
		15	deriv	Control	iPD	20	21	213	0.949	0.973	ns			15	deriv	Control	iPD	21	20	191	0.633	0.760	ns			15	deriv	CTR	iPD	6	6	26	0.24	0.36	ns
		15	deriv	Control	LRRK2_PD	20	21	167	0.271	0.924	ns			15	deriv	Control	LRRK2_PD	21	21	173	0.240	0.360	ns			15	deriv	CTR	LRRK2_PD	6	5	24	0.126	0.36	ns
		15	deriv	GBA_PD	iPD	24	21	250	0.973	0.973	ns			15	deriv	GBA_PD	iPD	25	20	305	0.216	0.360	ns			15	deriv	GBA_PD	iPD	6	6	19	0.937	0.937	ns
		15	deriv	GBA_PD	LRRK2_PD	24	21	226	0.565	0.924	ns			15	deriv	GBA_PD	LRRK2_PD	25	21	270	0.879	0.879	ns			15	deriv	GBA_PD	LRRK2_PD	6	5	23	0.177	0.36	ns
		15	deriv	iPD	LRRK2_PD	21	21	185	0.382	0.924	ns			15	deriv	iPD	LRRK2_PD	20	21	156	0.165	0.360	ns			15	deriv	iPD	LRRK2_PD	6	5	19	0.537	0.644	ns
		16	deriv	Control	GBA_PD	20	24	212	0.521	0.973	ns			16	deriv	Control	GBA_PD	21	25	195	0.141	0.211	ns			16	deriv	CTR	GBA_PD	6	6	25	0.31	0.643	ns
		16	deriv	Control	iPD	20	21	214	0.928	0.973	ns			16	deriv	Control	iPD	21	20	205	0.908	0.908	ns			16	deriv	CTR	iPD	6	6	21	0.699	0.699	ns
		16	deriv	Control	LRRK2_PD	20	21	175	0.372	0.973	ns			16	deriv	Control	LRRK2_PD	21	21	151	0.083	0.165	ns			16	deriv	CTR	LRRK2_PD	6	5	20	0.429	0.643	ns
		16	deriv	GBA_PD	iPD	24	21	268	0.727	0.973	ns			16	deriv	GBA_PD	iPD	25	20	327	0.080	0.165	ns			16	deriv	GBA_PD	iPD	6	6	9	0.18	0.643	ns
		16	deriv	GBA_PD	LRRK2_PD	24	21	250	0.973	0.973	ns			16	deriv	GBA_PD	LRRK2_PD	25	21	240	0.631	0.757	ns			16	deriv	GBA_PD	LRRK2_PD	6	5	9	0.329	0.643	ns
		16	deriv	iPD	LRRK2_PD	21	21	190	0.454	0.973	ns			16	deriv	iPD	LRRK2_PD	20	21	129	0.035	0.165	ns			16	deriv	iPD	LRRK2_PD	6	5	19	0.537	0.644	ns
		17	deriv	Control	GBA_PD	20	24	199	0.343	0.949	ns			17	deriv	Control	GBA_PD	21	25	192	0.123	0.184	ns			17	deriv	CTR	GBA_PD	6	6	25	0.31	0.515	ns
		17	deriv	Control	iPD	20	21	213	0.949	0.949	ns			17	deriv	Control	iPD	21	20	223	0.747	0.747	ns			17	deriv	CTR	iPD	6	6	20	0.818	0.818	ns
		17	deriv	Control	LRRK2_PD	20	21	198	0.767	0.949	ns			17	deriv	Control	LRRK2_PD	21	21	140	0.043	0.087	ns			17	deriv	CTR	LRRK2_PD	6	5	20	0.429	0.515	ns
		17	deriv	GBA_PD	iPD	24	21	271	0.677	0.949	ns			17	deriv	GBA_PD	iPD	25	20	347	0.026	0.080	ns			17	deriv	GBA_PD	iPD	6	6	6	0.065	0.378	ns
		17	deriv	GBA_PD	LRRK2_PD	24	21	286	0.450	0.949	ns			17	deriv	GBA_PD	LRRK2_PD	25	21	222	0.381	0.457	ns			17	deriv	GBA_PD	LRRK2_PD	6	5	6	0.126	0.378	ns
		17	deriv	iPD	LRRK2_PD	21	21	231	0.803	0.949	ns			17	deriv	iPD	LRRK2_PD	20	21	105	0.006	0.033	*			17	deriv	iPD	LRRK2_PD	6	5	20	0.429	0.515	ns
		18	deriv	Control	GBA_PD	20	24	180	0.162	0.495	ns			18	deriv	Control	GBA_PD	21	25	236	0.570	0.684	ns			18	deriv	CTR	GBA_PD	6	6	25	0.31	0.515	ns
		18	deriv	Control	iPD	20	21	156	0.165	0.495	ns			18	deriv	Control	iPD	21	20	203	0.867	0.867	ns			18	deriv	CTR	iPD	6	6	20	0.818	0.818	ns
		18	deriv	Control	LRRK2_PD	20	21	173	0.345	0.582	ns			18	deriv	Control	LRRK2_PD	21	21	142	0.049	0.098	ns			18	deriv	CTR	LRRK2_PD	6	5	20	0.429	0.515	ns
		18	deriv	GBA_PD	iPD	24	21	252	1.000	1.000	ns			18	deriv	GBA_PD	iPD	25	20	289	0.383	0.575	ns			18	deriv	GBA_PD	iPD	6	6	6	0.065	0.389	ns
		18	deriv	GBA_PD	LRRK2_PD	24	21	287	0.436	0.582	ns			18	deriv	GBA_PD	LRRK2_PD	25	21	170	0.042	0.098	ns			18	deriv	GBA_PD	LRRK2_PD	6	5	10	0.429	0.515	ns
		18	deriv	iPD	LRRK2_PD	21	21	249	0.485	0.582	ns			18	deriv	iPD	LRRK2_PD	20	21	122	0.021	0.098	ns			18	deriv	iPD	LRRK2_PD	6	5	21	0.329	0.515	ns
		19	deriv	Control	GBA_PD	20	24	165	0.079	0.158	ns			19	deriv	Control	GBA_PD	21	25	285	0.631	0.631	ns			19	deriv	CTR	GBA_PD	6	6	26	0.24	0.662	ns
		19	deriv	Control	iPD	20	21	101	0.004	0.014	*			19	deriv	Control	iPD	21	20	182	0.477	0.572	ns			19	deriv	CTR	iPD	6	6	23	0.485	0.662	ns
		19	deriv	Control	LRRK2_PD	20	21	103	0.005	0.014	*			19	deriv	Control	LRRK2_PD	21	21	167	0.184	0.285	ns			19	deriv	CTR	LRRK2_PD	6	5	20	0.429	0.662	ns
		19	deriv	GBA_PD	iPD	24	21	229	0.612	0.901	ns			19	deriv	GBA_PD	iPD	25	20	189	0.169	0.285	ns			19	deriv	GBA_PD	iPD	6	6	14	0.589	0.662	ns
		19	deriv	GBA_PD	LRRK2_PD	24	21	246	0.901	0.901	ns			19	deriv	GBA_PD	LRRK2_PD	25	21	147	0.010	0.061	ns			19	deriv	GBA_PD	LRRK2_PD	6	5	18	0.662	0.662	ns
		19	deriv	iPD	LRRK2_PD	21	21	233	0.765	0.901	ns			19	deriv	iPD	LRRK2_PD	20	21	159	0.190	0.285	ns			19	deriv	iPD	LRRK2_PD	6	5	24	0.126	0.662	ns
		20	deriv	Control	GBA_PD	20	24	165	0.079	0.158000	ns			20	deriv	Control	GBA_PD	21	25	320	0.211	0.422	ns			20	deriv	CTR	GBA_PD	6	6	26	0.24	0.48	ns
		20	deriv	Control	iPD	20	21	93	0.002	0.005000	**			20	deriv	Control	iPD	21	20	170	0.306	0.459	ns			20	deriv	CTR	iPD	6	6	24	0.394	0.485	ns
		20	deriv	Control	LRRK2_PD	20	21	65	7.27e-05	0.000436	***			20	deriv	Control	LRRK2_PD	21	21	199	0.601	0.615	ns			20	deriv	CTR	LRRK2_PD	6	5	23	0.177	0.48	ns
		20	deriv	GBA_PD	iPD	24	21	225	0.550	0.550000	ns			20	deriv	GBA_PD	iPD	25	20	137	0.009	0.055	ns			20	deriv	GBA_PD	iPD	6	6	23	0.485	0.485	ns
		20	deriv	GBA_PD	LRRK2_PD	24	21	206	0.304	0.456000	ns			20	deriv	GBA_PD	LRRK2_PD	25	21	162	0.026	0.079	ns			20	deriv	GBA_PD	LRRK2_PD	6	5	20	0.429	0.485	ns
		20	deriv	iPD	LRRK2_PD	21	21	191	0.470	0.550000	ns			20	deriv	iPD	LRRK2_PD	20	21	230	0.615	0.615	ns			20	deriv	iPD	LRRK2_PD	6	5	28	0.017	0.104	ns
		21	deriv	Control	GBA_PD	20	24	199	0.343	0.515	ns			21	deriv	Control	GBA_PD	21	25	308	0.324	0.519	ns			21	deriv	CTR	GBA_PD	6	6	26	0.24	0.288	ns
		21	deriv	Control	iPD	20	21	155	0.157	0.471	ns			21	deriv	Control	iPD	21	20	190	0.615	0.738	ns			21	deriv	CTR	iPD	6	6	29	0.093	0.186	ns
		21	deriv	Control	LRRK2_PD	20	21	119	0.017	0.103	ns			21	deriv	Control	LRRK2_PD	21	21	227	0.881	0.881	ns			21	deriv	CTR	LRRK2_PD	6	5	25	0.082	0.186	ns
		21	deriv	GBA_PD	iPD	24	21	243	0.848	0.848	ns			21	deriv	GBA_PD	iPD	25	20	171	0.073	0.436	ns			21	deriv	GBA_PD	iPD	6	6	25	0.31	0.31	ns
		21	deriv	GBA_PD	LRRK2_PD	24	21	217	0.436	0.523	ns			21	deriv	GBA_PD	LRRK2_PD	25	21	219	0.346	0.519	ns			21	deriv	GBA_PD	LRRK2_PD	6	5	24	0.126	0.189	ns
		21	deriv	iPD	LRRK2_PD	21	21	173	0.240	0.480	ns			21	deriv	iPD	LRRK2_PD	20	21	253	0.271	0.519	ns			21	deriv	iPD	LRRK2_PD	6	5	28	0.017	0.104	ns
		22	deriv	Control	GBA_PD	20	24	236	0.935	0.935	ns			22	deriv	Control	GBA_PD	21	25	259	0.948	0.948	ns			22	deriv	CTR	GBA_PD	6	6	25	0.31	0.372	ns
		22	deriv	Control	iPD	20	21	264	0.165	0.394	ns			22	deriv	Control	iPD	21	20	237	0.494	0.741	ns			22	deriv	CTR	iPD	6	6	28	0.132	0.198	ns
		22	deriv	Control	LRRK2_PD	20	21	269	0.128	0.394	ns			22	deriv	Control	LRRK2_PD	21	21	251	0.454	0.741	ns			22	deriv	CTR	LRRK2_PD	6	5	25	0.082	0.198	ns
		22	deriv	GBA_PD	iPD	24	21	307	0.217	0.394	ns			22	deriv	GBA_PD	iPD	25	20	313	0.155	0.741	ns			22	deriv	GBA_PD	iPD	6	6	24	0.394	0.394	ns
		22	deriv	GBA_PD	LRRK2_PD	24	21	302	0.263	0.394	ns			22	deriv	GBA_PD	LRRK2_PD	25	21	314	0.264	0.741	ns			22	deriv	GBA_PD	LRRK2_PD	6	5	25	0.082	0.198	ns
		22	deriv	iPD	LRRK2_PD	21	21	210	0.803	0.935	ns			22	deriv	iPD	LRRK2_PD	20	21	221	0.786	0.943	ns			22	deriv	iPD	LRRK2_PD	6	5	24	0.126	0.198	ns
		23	deriv	Control	GBA_PD	20	24	268	0.52100	0.521	ns			23	deriv	Control	GBA_PD	21	25	194	0.135	0.179	ns			23	deriv	CTR	GBA_PD	6	6	26	0.24	0.494	ns
		23	deriv	Control	iPD	20	21	320	0.00400	0.011	*			23	deriv	Control	iPD	21	20	279	0.074	0.148	ns			23	deriv	CTR	iPD	6	6	23	0.485	0.582	ns
		23	deriv	Control	LRRK2_PD	20	21	337	0.00064	0.004	**			23	deriv	Control	LRRK2_PD	21	21	256	0.382	0.382	ns			23	deriv	CTR	LRRK2_PD	6	5	24	0.126	0.494	ns
		23	deriv	GBA_PD	iPD	24	21	343	0.03900	0.058	ns			23	deriv	GBA_PD	iPD	25	20	387	0.001	0.008	**			23	deriv	GBA_PD	iPD	6	6	18	1	1	ns
		23	deriv	GBA_PD	LRRK2_PD	24	21	367	0.00800	0.016	*			23	deriv	GBA_PD	LRRK2_PD	25	21	349	0.057	0.148	ns			23	deriv	GBA_PD	LRRK2_PD	6	5	22	0.247	0.494	ns
		23	deriv	iPD	LRRK2_PD	21	21	258	0.35600	0.427	ns			23	deriv	iPD	LRRK2_PD	20	21	154	0.149	0.179	ns			23	deriv	iPD	LRRK2_PD	6	5	20	0.429	0.582	ns
		24	deriv	Control	GBA_PD	20	24	276	0.407000	0.407000	ns			24	deriv	Control	GBA_PD	21	25	177	0.060000	0.072	ns			24	deriv	CTR	GBA_PD	6	6	23	0.485	1	ns
		24	deriv	Control	iPD	20	21	336	0.000714	0.002000	**			24	deriv	Control	iPD	21	20	291	0.035000	0.069	ns			24	deriv	CTR	iPD	6	6	17	0.937	1	ns
		24	deriv	Control	LRRK2_PD	20	21	351	0.000122	0.000732	***			24	deriv	Control	LRRK2_PD	21	21	256	0.382000	0.382	ns			24	deriv	CTR	LRRK2_PD	6	5	15	1	1	ns
		24	deriv	GBA_PD	iPD	24	21	362	0.012000	0.018000	*			24	deriv	GBA_PD	iPD	25	20	406	0.000222	0.001	**			24	deriv	GBA_PD	iPD	6	6	13	0.485	1	ns
		24	deriv	GBA_PD	LRRK2_PD	24	21	385	0.002000	0.004000	**			24	deriv	GBA_PD	LRRK2_PD	25	21	362	0.028000	0.069	ns			24	deriv	GBA_PD	LRRK2_PD	6	5	13	0.792	1	ns
24	deriv	iPD	LRRK2_PD	21	21	282	0.126000	0.151000	ns					24	deriv	iPD	LRRK2_PD	20	21	137	0.058000	0.072	ns			24	deriv	iPD	LRRK2_PD	6	5	18	0.662	1	ns
																										25	deriv	CTR	GBA_PD	6	6	18	1	1	ns
																										25	deriv	CTR	iPD	6	6	12	0.394	0.591	ns
																										25	deriv	CTR	LRRK2_PD	6	5	8	0.247	0.494	ns
																										25	deriv	GBA_PD	iPD	6	6	8	0.132	0.494	ns
																										25	deriv	GBA_PD	LRRK2_PD	6	5	7	0.177	0.494	ns
																										25	deriv	iPD	LRRK2_PD	6	5	15	1	1	ns
																										26	deriv	CTR	GBA_PD	6	6	16	0.818	0.931	ns
																										26	deriv	CTR	iPD	6	6	8	0.132	0.198	ns
																										26	deriv	CTR	LRRK2_PD	6	5	5	0.082	0.198	ns
																										26	deriv	GBA_PD	iPD	6	6	8	0.132	0.198	ns
																										26	deriv	GBA_PD	LRRK2_PD	6	5	5	0.082	0.198	ns
																										26	deriv	iPD	LRRK2_PD	6	5	14	0.931	0.931	ns
																										27	deriv	CTR	GBA_PD	6	6	15	0.699	0.792	ns
																										27	deriv	CTR	iPD	6	6	9	0.18	0.36	ns
																										27	deriv	CTR	LRRK2_PD	6	5	5	0.082	0.36	ns
																										27	deriv	GBA_PD	iPD	6	6	11	0.31	0.465	ns
																										27	deriv	GBA_PD	LRRK2_PD	6	5	7	0.177	0.36	ns
																										27	deriv	iPD	LRRK2_PD	6	5	13	0.792	0.792	ns
																										28	deriv	CTR	GBA_PD	6	6	13	0.485	0.937	ns
																										28	deriv	CTR	iPD	6	6	12	0.394	0.937	ns
																										28	deriv	CTR	LRRK2_PD	6	5	9	0.329	0.937	ns
																										28	deriv	GBA_PD	iPD	6	6	17	0.937	0.937	ns
																										28	deriv	GBA_PD	LRRK2_PD	6	5	12	0.662	0.937	ns
																										28	deriv	iPD	LRRK2_PD	6	5	13	0.792	0.937	ns
																										29	deriv	CTR	GBA_PD	6	6	13	0.485	0.931	ns
																										29	deriv	CTR	iPD	6	6	16	0.818	0.931	ns
																										29	deriv	CTR	LRRK2_PD	6	5	12	0.662	0.931	ns
																										29	deriv	GBA_PD	iPD	6	6	21	0.699	0.931	ns
																										29	deriv	GBA_PD	LRRK2_PD	6	5	19	0.537	0.931	ns
																										29	deriv	iPD	LRRK2_PD	6	5	14	0.931	0.931	ns
																										30	deriv	CTR	GBA_PD	6	6	15	0.699	0.982	ns
																										30	deriv	CTR	iPD	6	6	20	0.818	0.982	ns
																										30	deriv	CTR	LRRK2_PD	6	5	18	0.662	0.982	ns
																										30	deriv	GBA_PD	iPD	6	6	24	0.394	0.982	ns
																										30	deriv	GBA_PD	LRRK2_PD	6	5	24	0.126	0.756	ns
																										30	deriv	iPD	LRRK2_PD	6	5	15	1	1	ns
																										31	deriv	CTR	GBA_PD	6	6	19	0.937	0.937	ns
																										31	deriv	CTR	iPD	6	6	26	0.24	0.36	ns
																										31	deriv	CTR	LRRK2_PD	6	5	29	0.009	0.052	ns
																										31	deriv	GBA_PD	iPD	6	6	27	0.18	0.36	ns
																										31	deriv	GBA_PD	LRRK2_PD	6	5	28	0.017	0.052	ns
																										31	deriv	iPD	LRRK2_PD	6	5	18	0.662	0.794	ns
																										32	deriv	CTR	GBA_PD	6	6	23	0.485	0.485	ns
																										32	deriv	CTR	iPD	6	6	31	0.041	0.104	ns
																										32	deriv	CTR	LRRK2_PD	6	5	30	0.004	0.026	*
																										32	deriv	GBA_PD	iPD	6	6	24	0.394	0.473	ns
																										32	deriv	GBA_PD	LRRK2_PD	6	5	26	0.052	0.104	ns
																										32	deriv	iPD	LRRK2_PD	6	5	23	0.177	0.265	ns
																										33	deriv	CTR	GBA_PD	6	6	29	0.093	0.186	ns
																										33	deriv	CTR	iPD	6	6	31	0.041	0.123	ns
																										33	deriv	CTR	LRRK2_PD	6	5	30	0.004	0.026	*
																										33	deriv	GBA_PD	iPD	6	6	16	0.818	0.818	ns
																										33	deriv	GBA_PD	LRRK2_PD	6	5	23	0.177	0.212	ns
																										33	deriv	iPD	LRRK2_PD	6	5	24	0.126	0.189	ns
																										34	deriv	CTR	GBA_PD	6	6	34	0.009	0.026	*
																										34	deriv	CTR	iPD	6	6	24	0.394	0.473	ns
																										34	deriv	CTR	LRRK2_PD	6	5	30	0.004	0.026	*
																										34	deriv	GBA_PD	iPD	6	6	9	0.18	0.27	ns
																										34	deriv	GBA_PD	LRRK2_PD	6	5	14	0.931	0.931	ns
																										34	deriv	iPD	LRRK2_PD	6	5	23	0.177	0.27	ns
																										35	deriv	CTR	GBA_PD	6	6	32	0.026	0.123	ns
																										35	deriv	CTR	iPD	6	6	21	0.699	0.699	ns
																										35	deriv	CTR	LRRK2_PD	6	5	25	0.082	0.123	ns
																										35	deriv	GBA_PD	iPD	6	6	5	0.041	0.123	ns
																										35	deriv	GBA_PD	LRRK2_PD	6	5	6	0.126	0.151	ns
																										35	deriv	iPD	LRRK2_PD	6	5	25	0.082	0.123	ns
																										36	deriv	CTR	GBA_PD	6	6	30	0.065	0.099	ns
																										36	deriv	CTR	iPD	6	6	17	0.937	0.937	ns
																										36	deriv	CTR	LRRK2_PD	6	5	25	0.082	0.099	ns
																										36	deriv	GBA_PD	iPD	6	6	5	0.041	0.099	ns
																										36	deriv	GBA_PD	LRRK2_PD	6	5	4	0.052	0.099	ns
																										36	deriv	iPD	LRRK2_PD	6	5	25	0.082	0.099	ns
																										37	deriv	CTR	GBA_PD	6	6	29	0.093	0.14	ns
																										37	deriv	CTR	iPD	6	6	18	1	1	ns
																										37	deriv	CTR	LRRK2_PD	6	5	25	0.082	0.14	ns
																										37	deriv	GBA_PD	iPD	6	6	7	0.093	0.14	ns
																										37	deriv	GBA_PD	LRRK2_PD	6	5	12	0.662	0.794	ns
																										37	deriv	iPD	LRRK2_PD	6	5	25	0.082	0.14	ns
																										38	deriv	CTR	GBA_PD	6	6	28	0.132	0.198	ns
																										38	deriv	CTR	iPD	6	6	19	0.937	0.937	ns
																										38	deriv	CTR	LRRK2_PD	6	5	25	0.082	0.198	ns
																										38	deriv	GBA_PD	iPD	6	6	8	0.132	0.198	ns
																										38	deriv	GBA_PD	LRRK2_PD	6	5	12	0.662	0.794	ns
																										38	deriv	iPD	LRRK2_PD	6	5	25	0.082	0.198	ns
																										39	deriv	CTR	GBA_PD	6	6	26	0.24	0.48	ns
																										39	deriv	CTR	iPD	6	6	18	1	1	ns
																										39	deriv	CTR	LRRK2_PD	6	5	25	0.082	0.247	ns
																										39	deriv	GBA_PD	iPD	6	6	12	0.394	0.591	ns
																										39	deriv	GBA_PD	LRRK2_PD	6	5	17	0.792	0.95	ns
																										39	deriv	iPD	LRRK2_PD	6	5	25	0.082	0.247	ns
																										40	deriv	CTR	GBA_PD	6	6	26	0.24	0.48	ns
																										40	deriv	CTR	iPD	6	6	19	0.937	0.937	ns
																										40	deriv	CTR	LRRK2_PD	6	5	25	0.082	0.247	ns
																										40	deriv	GBA_PD	iPD	6	6	12	0.394	0.591	ns
																										40	deriv	GBA_PD	LRRK2_PD	6	5	17	0.792	0.937	ns
																										40	deriv	iPD	LRRK2_PD	6	5	25	0.082	0.247	ns
