# Supplementary material for: Integrated Stress Response Signatures Drive Monocyte Dysfunction in GBA1- and LRRK2-Linked Parkinson’s Disease
Source: Research Square preprint supplement (doi:10.21203/rs.3.rs-8615050/v1), 2026-02-16
Supplement: Supplementary file 2 [file 2cc7e24322d83ad67b3f4b6a.xlsx]

## Sheet: README
Section	Description
METHOD	Individual subject-level derivatives from GAM-fitted trajectories (scaled fluorescence ×10^-6 A.U.)
Key_Point	Each subject has unique smoothed trajectory and rate of change; covariates adjusted in-model; fluorescence scaled.
GAM	GAM model with subject-specific random effects + covariates (scaled response)
LMER	Linear mixed-effects model for overall slopes + covariates (scaled response)
Tests	Wilcoxon tests on individual subject rates (scaled dF/dt)
Derivatives	Subject-specific instantaneous rates (smoothed, scaled dF/dt, ×10^-6 A.U./h)
Fitted	Subject-specific fitted fluorescence values (smoothed, covariate-adjusted, scaled ×10^-6 A.U.)
Plot_Type	Use_This_Sheet	What_It_Tests	Interpretation
Fluorescence Trajectories (scaled)	LMER_Fixed	Group×time interactions (β coefficients) in scaled fluorescence, covariate-adjusted	Do groups accumulate fluorescence at different linear rates (after covariate adjustment, in scaled units)?
Fluorescence Trajectories (scaled)	LMER_Slope_Pairs	Direct pairwise slope comparisons in scaled units	How much do slopes differ between specific group pairs (scaled fluorescence per hour)?
Rate Changes (Derivatives, scaled)	Wilcoxon_Subjects	Overall subject-level rate differences between groups (scaled dF/dt)	Do subjects have different mean rates across entire experiment (scaled dF/dt)?
Rate Changes (Derivatives, scaled)	Wilcoxon_Timepoints	Time-point-specific rate differences (scaled dF/dt)	At which specific times do rates differ (scaled dF/dt)?
Subject Boxplots (mean scaled dF/dt)	Wilcoxon_Subjects	Same as Wilcoxon_Subjects (visual representation, scaled dF/dt)	Distribution of subject-level mean rates per group (scaled dF/dt)

## Sheet: Data_Summary
Baseline TMRM
group	n_subjects
Control	18
GBA_PD	16
iPD	17
LRRK2_PD	14
ADP-Response
group	n_subjects
Control	13
GBA_PD	14
iPD	12
LRRK2_PD	13

## Sheet: Covariate_Screening
BASELINE TMRM
term	estimate	std.error	statistic	p.value
(Intercept)	20.12	2.31074	8.7072	9.37713e-18
time_elapsed_hours	-0.789464	0.0449493	-17.5634	4.48711e-62
groupGBA_PD	-1.56764	0.992838	-1.57894	0.114595
groupiPD	3.24328	0.938242	3.45676	0.000564522
groupLRRK2_PD	-7.70076	1.00341	-7.67458	3.26173e-14
age_at_draw	0.23736	0.0274048	8.66126	1.37365e-17
clinicNYUMD	14.6582	1.66204	8.81936	3.6656e-18
weeks_cryo	0.00246591	0.00366276	0.673237	0.500917
ancestryNon-Jewish	-6.84983	1.21678	-5.62949	2.21598e-08
ancestrySephardic Jewish	-25.2781	2.61988	-9.64857	2.56963e-21
sexMale	4.61119	0.641117	7.19243	1.07643e-12
assay_date_numeric	-0.0107549	0.00144274	-7.45449	1.64978e-13
ADP RESPONSE
term	estimate	std.error	statistic	p.value
(Intercept)	13.9016	2.57982	5.38861	8.43506e-08
time_elapsed_hours	-0.27464	0.0322943	-8.5043	4.99572e-17
groupGBA_PD	-4.00803	1.00321	-3.99519	6.83016e-05
groupiPD	-3.59436	1.03681	-3.46674	0.000544155
groupLRRK2_PD	-10.5554	1.03354	-10.2129	1.33893e-23
age_at_draw	0.235372	0.0243222	9.67725	1.97918e-21
clinicNYUMD	6.49841	1.54201	4.21425	2.68079e-05
weeks_cryo	-0.0177771	0.00319933	-5.55651	3.34084e-08
ancestryNon-Jewish	-5.2508	1.03834	-5.05693	4.87628e-07
ancestrySephardic Jewish	-18.1133	2.19919	-8.23632	4.31812e-16
sexMale	3.1376	0.630212	4.97864	7.27124e-07
assay_date_numeric	0.004079	0.00417595	0.976782	0.32886

## Sheet: Covariate_Fit
BASELINE TMRM
r.squared	adj.r.squared	sigma	statistic	p.value	df	logLik	AIC	BIC	deviance	df.residual	nobs
0.3591	0.353627	9.34524	65.6068	3.20691e-116	11	-4743.92	9513.84	9581.05	112486	1288	1300
ADP RESPONSE
r.squared	adj.r.squared	sigma	statistic	p.value	df	logLik	AIC	BIC	deviance	df.residual	nobs
0.286704	0.280612	8.39652	47.0637	1.00318e-86	11	-4604.75	9235.51	9302.72	90805.9	1288	1300

## Sheet: GAM_Parametric
GAM PARAMETRIC								GAM SMOOTHS
BASELINE TMRM
term	Estimate	Std. Error	t value	Pr(>|t|)	p.value			term	edf	Ref.df	F	p-value	p.value
(Intercept)	11.9554	7.5409	1.58541	0.113184	0.11318			s(time_elapsed_hours):groupControl	7.57046	8.46142	9.64355	0	< 1e-10
groupGBA_PD	-1.44062	3.26238	-0.441586	0.658882	0.65888			s(time_elapsed_hours):groupGBA_PD	8.17438	8.79493	9.62518	0	< 1e-10
groupiPD	3.36513	3.13493	1.07343	0.283333	0.28333			s(time_elapsed_hours):groupiPD	7.6234	8.49562	11.0304	0	< 1e-10
groupLRRK2_PD	-7.55801	3.29507	-2.29373	0.0220085	0.02201			s(time_elapsed_hours):groupLRRK2_PD	1.00533	1.00735	14.563	0.000141307	0.000141
age_at_draw	0.23779	0.0933489	2.54733	0.0110011	0.01100			s(time_elapsed_hours,sample_id_factor)	246.163	311	14.5979	0	< 1e-10
clinicNYUMD	14.3788	5.48509	2.62144	0.00888634	0.00889
ancestryNon-Jewish	-6.79038	4.09374	-1.65872	0.0974792	0.09748
ancestrySephardic Jewish	-24.896	8.76443	-2.84057	0.00459292	0.00459
sexMale	4.63222	2.15379	2.15073	0.0317323	0.03173
assay_date_numeric	-0.0102012	0.00490138	-2.08128	0.0376572	0.03766
ADP RESPONSE
term	Estimate	Std. Error	t value	Pr(>|t|)	p.value			term	edf	Ref.df	F	p-value	p.value
(Intercept)	9.69586	10.3052	0.940868	0.346993	0.3470			s(time_elapsed_hours):groupControl	8.81269	8.95951	36.1224	0	<1e-10
groupGBA_PD	-3.19932	5.07107	-0.630897	0.528248	0.5282			s(time_elapsed_hours):groupGBA_PD	8.66086	8.91544	23.0116	0	<1e-10
groupiPD	-2.72057	5.23861	-0.519329	0.603642	0.6036			s(time_elapsed_hours):groupiPD	8.19176	8.72313	13.5871	0	<1e-10
groupLRRK2_PD	-10.1622	5.18737	-1.95903	0.0503783	0.0504			s(time_elapsed_hours):groupLRRK2_PD	7.83112	8.52575	7.89707	0	<1e-10
age_at_draw	0.255585	0.122458	2.08712	0.0371221	0.0371			s(time_elapsed_hours,sample_id_factor)	223.066	246	272.958	0	<1e-10
clinicNYUMD	8.27832	7.72466	1.07167	0.284117	0.2841
weeks_cryo	-0.0177043	0.0158458	-1.11729	0.264131	0.2641
ancestryNon-Jewish	-5.50272	5.22838	-1.05247	0.29283	0.2928
ancestrySephardic Jewish	-20.2673	11.0734	-1.83027	0.0674975	0.0675
sexMale	3.63116	3.17841	1.14245	0.253534	0.2535

## Sheet: LMER_Fixed
	LMER
BASELINE TMRM										PAIR-WISE SLOPE COMPARISONS
effect	term	estimate	std.error	statistic	df	p.value	conf.low	conf.high		contrast	estimate	SE	df	t.ratio	p.value
fixed	(Intercept)	21.2373	7.56399	2.80768	55.8126	0.00686	6.08367	36.3909		Control - GBA_PD	-0.162154	0.0897705	1231	-1.80632	0.270770
fixed	groupGBA_PD	-3.09348	3.3934	-0.911617	64.5612	0.36536	-9.87145	3.68448		Control - iPD	0.104157	0.0883617	1231	1.17876	0.640414
fixed	groupiPD	4.46062	3.267	1.36536	65.0507	0.17684	-2.06394	10.9852		Control - LRRK2_PD	-0.296546	0.0931033	1231	-3.18512	0.008073
fixed	groupLRRK2_PD	-10.6343	3.43456	-3.09628	65.1021	0.00289	-17.4934	-3.77526		GBA_PD - iPD	0.266311	0.0910045	1231	2.92635	0.018322
fixed	time_elapsed_hours	-0.86601	0.0615821	-14.0627	1231	< 1e-10	-0.986827	-0.745192		GBA_PD - LRRK2_PD	-0.134392	0.0956152	1231	-1.40555	0.496062
fixed	age_at_draw	0.237109	0.0932934	2.54154	55	0.01389	0.0501447	0.424073		iPD - LRRK2_PD	-0.400702	0.0942937	1231	-4.24951	0.000135
fixed	clinicNYUMD	14.3807	5.48183	2.62334	55	0.01125	3.39485	25.3665
fixed	ancestryNon-Jewish	-6.72129	4.0913	-1.64282	55	0.10613	-14.9204	1.47787
fixed	ancestrySephardic Jewish	-24.9451	8.75922	-2.84787	55	0.00618	-42.499	-7.39124
fixed	sexMale	4.68278	2.15251	2.1755	55	0.03391	0.369052	8.99651
fixed	assay_date_numeric	-0.010683	0.00489847	-2.18089	55	0.03349	-0.0204998	-0.000866262
fixed	groupGBA_PD:time_elapsed_hours	0.162154	0.0897705	1.80632	1231	0.07111	-0.0139662	0.338274
fixed	groupiPD:time_elapsed_hours	-0.104157	0.0883617	-1.17876	1231	0.23872	-0.277513	0.0691993
fixed	groupLRRK2_PD:time_elapsed_hours	0.296546	0.0931033	3.18512	1231	0.00148	0.113887	0.479204
ADP RESPONSE
effect	term	estimate	std.error	statistic	df	p.value	conf.low	conf.high		contrast	estimate	SE	df	t.ratio	p.value
fixed	(Intercept)	15.766	10.363	1.52137	42.0919	0.1356	-5.14606	36.6781		Control - GBA_PD	-0.0411852	0.0365825	1244	-1.12582	0.6736
fixed	groupGBA_PD	-4.53629	5.11031	-0.887674	42.7369	0.3797	-14.844	5.77147		Control - iPD	0.0176155	0.038022	1244	0.463298	0.9670
fixed	groupiPD	-3.33372	5.27931	-0.63147	42.746	0.5311	-13.9823	7.31485		Control - LRRK2_PD	-0.0888506	0.0372538	1244	-2.38501	0.0805
fixed	groupLRRK2_PD	-11.8305	5.2274	-2.26317	42.7303	0.0288	-22.3745	-1.28651		GBA_PD - iPD	0.0588008	0.0373645	1244	1.5737	0.3941
fixed	time_elapsed_hours	-0.303876	0.0263424	-11.5356	1244	<1e-10	-0.355557	-0.252196		GBA_PD - LRRK2_PD	-0.0476654	0.0365825	1244	-1.30296	0.5612
fixed	age_at_draw	0.236896	0.123107	1.9243	42	0.0611	-0.0115449	0.485337		iPD - LRRK2_PD	-0.106466	0.038022	1244	-2.80012	0.0266
fixed	clinicNYUMD	6.67739	7.76561	0.859867	42	0.3947	-8.99425	22.349
fixed	weeks_cryo	-0.0171819	0.0159298	-1.0786	42	0.2869	-0.0493295	0.0149658
fixed	ancestryNon-Jewish	-5.31424	5.2561	-1.01106	42	0.3178	-15.9215	5.29301
fixed	ancestrySephardic Jewish	-18.2486	11.1321	-1.63928	42	0.1086	-40.7141	4.21684
fixed	sexMale	3.12102	3.19526	0.976765	42	0.3343	-3.32728	9.56931
fixed	groupGBA_PD:time_elapsed_hours	0.0411852	0.0365825	1.12582	1244	0.2605	-0.0305851	0.112956
fixed	groupiPD:time_elapsed_hours	-0.0176155	0.038022	-0.463298	1244	0.6432	-0.0922099	0.0569789
fixed	groupLRRK2_PD:time_elapsed_hours	0.0888506	0.0372538	2.38501	1244	0.0172	0.0157634	0.161938

## Sheet: Wilcoxon_Subjects
Comparison of overall subject-level rate differences between groups (scaled dF/dt)
BASELINE TMRM
.y.	group1	group2	n1	n2	statistic	p	p.adj	p.adj.signif
mean_deriv	Control	GBA_PD	18	16	152	0.798	0.798	ns
mean_deriv	Control	iPD	18	17	176	0.463	0.558	ns
mean_deriv	Control	LRRK2_PD	18	14	69	0.030	0.061	ns
mean_deriv	GBA_PD	iPD	16	17	157	0.465	0.558	ns
mean_deriv	GBA_PD	LRRK2_PD	16	14	54	0.015	0.046	*
mean_deriv	iPD	LRRK2_PD	17	14	48	0.004	0.024	*
ADP RESPONSE
.y.	group1	group2	n1	n2	statistic	p	p.adj	p.adj.signif
mean_deriv	Control	GBA_PD	13	14	85	0.793	0.840	ns
mean_deriv	Control	iPD	13	12	89	0.574	0.840	ns
mean_deriv	Control	LRRK2_PD	13	13	89	0.840	0.840	ns
mean_deriv	GBA_PD	iPD	14	12	118	0.085	0.509	ns
mean_deriv	GBA_PD	LRRK2_PD	14	13	107	0.458	0.840	ns
mean_deriv	iPD	LRRK2_PD	12	13	70	0.689	0.840	ns

## Sheet: Wilcoxon_Timepoints
Time-point-specific rate differences (scaled dF/dt)	BASELINE TMRM	time_elapsed_hours	.y.	group1	group2	n1	n2	statistic	p	p.adj	p.adj.signif		ADP RESPONSE	time_elapsed_hours	.y.	group1	group2	n1	n2	statistic	p	p.adj	p.adj.signif
		1	deriv	Control	GBA_PD	18	16	195	0.081000	0.122000	ns			1	deriv	Control	GBA_PD	13	14	89	0.943	1	ns
		1	deriv	Control	iPD	18	17	169	0.613000	0.613000	ns			1	deriv	Control	iPD	13	12	68	0.611	1	ns
		1	deriv	Control	LRRK2_PD	18	14	31	0.000132	0.000264	***			1	deriv	Control	LRRK2_PD	13	13	84	1.000	1	ns
		1	deriv	GBA_PD	iPD	16	17	102	0.231000	0.277000	ns			1	deriv	GBA_PD	iPD	14	12	79	0.820	1	ns
		1	deriv	GBA_PD	LRRK2_PD	16	14	9	1.33e-06	7.98e-06	****			1	deriv	GBA_PD	LRRK2_PD	14	13	98	0.756	1	ns
		1	deriv	iPD	LRRK2_PD	17	14	23	4.17e-05	0.000125	***			1	deriv	iPD	LRRK2_PD	12	13	86	0.689	1	ns
		2	deriv	Control	GBA_PD	18	16	181	0.211	0.316000	ns			2	deriv	Control	GBA_PD	13	14	93	0.943	1	ns
		2	deriv	Control	iPD	18	17	168	0.636	0.636000	ns			2	deriv	Control	iPD	13	12	79	0.979	1	ns
		2	deriv	Control	LRRK2_PD	18	14	46	0.002	0.004000	**			2	deriv	Control	LRRK2_PD	13	13	95	0.614	1	ns
		2	deriv	GBA_PD	iPD	16	17	111	0.382	0.458000	ns			2	deriv	GBA_PD	iPD	14	12	84	1.000	1	ns
		2	deriv	GBA_PD	LRRK2_PD	16	14	21	4.68e-05	0.000281	***			2	deriv	GBA_PD	LRRK2_PD	14	13	105	0.519	1	ns
		2	deriv	iPD	LRRK2_PD	17	14	40	0.001	0.004000	**			2	deriv	iPD	LRRK2_PD	12	13	86	0.689	1	ns
		3	deriv	Control	GBA_PD	18	16	154	0.746	0.763	ns			3	deriv	Control	GBA_PD	13	14	105	0.519	0.623	ns
		3	deriv	Control	iPD	18	17	165	0.708	0.763	ns			3	deriv	Control	iPD	13	12	99	0.270	0.540	ns
		3	deriv	Control	LRRK2_PD	18	14	93	0.220	0.440	ns			3	deriv	Control	LRRK2_PD	13	13	118	0.091	0.384	ns
		3	deriv	GBA_PD	iPD	16	17	145	0.763	0.763	ns			3	deriv	GBA_PD	iPD	14	12	98	0.494	0.623	ns
		3	deriv	GBA_PD	LRRK2_PD	16	14	81	0.208	0.440	ns			3	deriv	GBA_PD	LRRK2_PD	14	13	123	0.128	0.384	ns
		3	deriv	iPD	LRRK2_PD	17	14	81	0.138	0.440	ns			3	deriv	iPD	LRRK2_PD	12	13	87	0.650	0.650	ns
		4	deriv	Control	GBA_PD	18	16	115	0.330	0.660	ns			4	deriv	Control	GBA_PD	13	14	119	0.185	0.222	ns
		4	deriv	Control	iPD	18	17	159	0.858	0.858	ns			4	deriv	Control	iPD	13	12	117	0.034	0.069	ns
		4	deriv	Control	LRRK2_PD	18	14	139	0.639	0.858	ns			4	deriv	Control	LRRK2_PD	13	13	141	0.003	0.017	*
		4	deriv	GBA_PD	iPD	16	17	166	0.292	0.660	ns			4	deriv	GBA_PD	iPD	14	12	113	0.145	0.217	ns
		4	deriv	GBA_PD	LRRK2_PD	16	14	148	0.142	0.660	ns			4	deriv	GBA_PD	LRRK2_PD	14	13	140	0.017	0.050	ns
		4	deriv	iPD	LRRK2_PD	17	14	128	0.739	0.858	ns			4	deriv	iPD	LRRK2_PD	12	13	88	0.611	0.611	ns
		5	deriv	Control	GBA_PD	18	16	116	0.347	0.505	ns			5	deriv	Control	GBA_PD	13	14	123	0.128000	0.154	ns
		5	deriv	Control	iPD	18	17	160	0.832	0.832	ns			5	deriv	Control	iPD	13	12	126	0.008000	0.024	*
		5	deriv	Control	LRRK2_PD	18	14	148	0.419	0.505	ns			5	deriv	Control	LRRK2_PD	13	13	148	0.000628	0.004	**
		5	deriv	GBA_PD	iPD	16	17	166	0.292	0.505	ns			5	deriv	GBA_PD	iPD	14	12	115	0.118000	0.154	ns
		5	deriv	GBA_PD	LRRK2_PD	16	14	158	0.058	0.347	ns			5	deriv	GBA_PD	LRRK2_PD	14	13	141	0.015000	0.029	*
		5	deriv	iPD	LRRK2_PD	17	14	140	0.421	0.505	ns			5	deriv	iPD	LRRK2_PD	12	13	82	0.852000	0.852	ns
		6	deriv	Control	GBA_PD	18	16	158	0.646	0.866	ns			6	deriv	Control	GBA_PD	13	14	115	0.259	0.311	ns
		6	deriv	Control	iPD	18	17	167	0.660	0.866	ns			6	deriv	Control	iPD	13	12	116	0.040	0.150	ns
		6	deriv	Control	LRRK2_PD	18	14	121	0.866	0.866	ns			6	deriv	Control	LRRK2_PD	13	13	123	0.050	0.150	ns
		6	deriv	GBA_PD	iPD	16	17	142	0.845	0.866	ns			6	deriv	GBA_PD	iPD	14	12	108	0.231	0.311	ns
		6	deriv	GBA_PD	LRRK2_PD	16	14	102	0.697	0.866	ns			6	deriv	GBA_PD	LRRK2_PD	14	13	115	0.259	0.311	ns
		6	deriv	iPD	LRRK2_PD	17	14	96	0.377	0.866	ns			6	deriv	iPD	LRRK2_PD	12	13	68	0.611	0.611	ns
		7	deriv	Control	GBA_PD	18	16	177	0.266	0.382	ns			7	deriv	Control	GBA_PD	13	14	73	0.402	0.564	ns
		7	deriv	Control	iPD	18	17	184	0.318	0.382	ns			7	deriv	Control	iPD	13	12	64	0.470	0.564	ns
		7	deriv	Control	LRRK2_PD	18	14	74	0.049	0.099	ns			7	deriv	Control	LRRK2_PD	13	13	36	0.012	0.036	*
		7	deriv	GBA_PD	iPD	16	17	137	0.986	0.986	ns			7	deriv	GBA_PD	iPD	14	12	78	0.781	0.781	ns
		7	deriv	GBA_PD	LRRK2_PD	16	14	47	0.006	0.031	*			7	deriv	GBA_PD	LRRK2_PD	14	13	36	0.007	0.036	*
		7	deriv	iPD	LRRK2_PD	17	14	55	0.010	0.031	*			7	deriv	iPD	LRRK2_PD	12	13	47	0.098	0.195	ns
		8	deriv	Control	GBA_PD	18	16	105	0.187	0.374	ns			8	deriv	Control	GBA_PD	13	14	42	0.017000	0.020000	*
		8	deriv	Control	iPD	18	17	171	0.568	0.667	ns			8	deriv	Control	iPD	13	12	16	0.000344	0.000688	***
		8	deriv	Control	LRRK2_PD	18	14	100	0.338	0.507	ns			8	deriv	Control	LRRK2_PD	13	13	3	1.35e-06	4.05e-06	****
		8	deriv	GBA_PD	iPD	16	17	183	0.094	0.374	ns			8	deriv	GBA_PD	iPD	14	12	41	0.027000	0.027000	*
		8	deriv	GBA_PD	LRRK2_PD	16	14	123	0.667	0.667	ns			8	deriv	GBA_PD	LRRK2_PD	14	13	2	3.99e-07	2.39e-06	****
		8	deriv	iPD	LRRK2_PD	17	14	85	0.186	0.374	ns			8	deriv	iPD	LRRK2_PD	12	13	19	0.000756	0.001000	**
		9	deriv	Control	GBA_PD	18	16	90	0.064	0.129	ns			9	deriv	Control	GBA_PD	13	14	58	0.116	0.139000	ns
		9	deriv	Control	iPD	18	17	164	0.732	0.878	ns			9	deriv	Control	iPD	13	12	25	0.003	0.006000	**
		9	deriv	Control	LRRK2_PD	18	14	123	0.925	0.925	ns			9	deriv	Control	LRRK2_PD	13	13	4	2.31e-06	1.39e-05	****
		9	deriv	GBA_PD	iPD	16	17	192	0.044	0.129	ns			9	deriv	GBA_PD	iPD	14	12	56	0.160	0.160000	ns
		9	deriv	GBA_PD	LRRK2_PD	16	14	157	0.064	0.129	ns			9	deriv	GBA_PD	LRRK2_PD	14	13	13	3.72e-05	0.000112	***
		9	deriv	iPD	LRRK2_PD	17	14	105	0.597	0.878	ns			9	deriv	iPD	LRRK2_PD	12	13	38	0.030	0.045000	*
		10	deriv	Control	GBA_PD	18	16	121	0.443	0.630	ns			10	deriv	Control	GBA_PD	13	14	79	0.583	0.810	ns
		10	deriv	Control	iPD	18	17	162	0.782	0.782	ns			10	deriv	Control	iPD	13	12	61	0.376	0.810	ns
		10	deriv	Control	LRRK2_PD	18	14	90	0.180	0.462	ns			10	deriv	Control	LRRK2_PD	13	13	53	0.113	0.678	ns
		10	deriv	GBA_PD	iPD	16	17	170	0.231	0.462	ns			10	deriv	GBA_PD	iPD	14	12	77	0.742	0.810	ns
		10	deriv	GBA_PD	LRRK2_PD	16	14	96	0.525	0.630	ns			10	deriv	GBA_PD	LRRK2_PD	14	13	78	0.550	0.810	ns
		10	deriv	iPD	LRRK2_PD	17	14	79	0.118	0.462	ns			10	deriv	iPD	LRRK2_PD	12	13	73	0.810	0.810	ns
		11	deriv	Control	GBA_PD	18	16	149	0.878	0.878	ns			11	deriv	Control	GBA_PD	13	14	85	0.793	0.936	ns
		11	deriv	Control	iPD	18	17	167	0.660	0.878	ns			11	deriv	Control	iPD	13	12	76	0.936	0.936	ns
		11	deriv	Control	LRRK2_PD	18	14	62	0.014	0.043	*			11	deriv	Control	LRRK2_PD	13	13	71	0.511	0.936	ns
		11	deriv	GBA_PD	iPD	16	17	146	0.736	0.878	ns			11	deriv	GBA_PD	iPD	14	12	87	0.899	0.936	ns
		11	deriv	GBA_PD	LRRK2_PD	16	14	57	0.022	0.044	*			11	deriv	GBA_PD	LRRK2_PD	14	13	97	0.793	0.936	ns
		11	deriv	iPD	LRRK2_PD	17	14	55	0.010	0.043	*			11	deriv	iPD	LRRK2_PD	12	13	81	0.894	0.936	ns
		12	deriv	Control	GBA_PD	18	16	113	0.297	0.446	ns			12	deriv	Control	GBA_PD	13	14	80	0.616	0.979	ns
		12	deriv	Control	iPD	18	17	176	0.463	0.552	ns			12	deriv	Control	iPD	13	12	71	0.728	0.979	ns
		12	deriv	Control	LRRK2_PD	18	14	79	0.077	0.231	ns			12	deriv	Control	LRRK2_PD	13	13	62	0.264	0.979	ns
		12	deriv	GBA_PD	iPD	16	17	178	0.136	0.272	ns			12	deriv	GBA_PD	iPD	14	12	86	0.940	0.979	ns
		12	deriv	GBA_PD	LRRK2_PD	16	14	97	0.552	0.552	ns			12	deriv	GBA_PD	LRRK2_PD	14	13	89	0.943	0.979	ns
		12	deriv	iPD	LRRK2_PD	17	14	66	0.036	0.215	ns			12	deriv	iPD	LRRK2_PD	12	13	77	0.979	0.979	ns
		13	deriv	Control	GBA_PD	18	16	54	0.001000	0.003	**			13	deriv	Control	GBA_PD	13	14	70	0.325	0.564	ns
		13	deriv	Control	iPD	18	17	175	0.483000	0.570	ns			13	deriv	Control	iPD	13	12	61	0.376	0.564	ns
		13	deriv	Control	LRRK2_PD	18	14	156	0.267000	0.400	ns			13	deriv	Control	LRRK2_PD	13	13	46	0.050	0.301	ns
		13	deriv	GBA_PD	iPD	16	17	223	0.001000	0.003	**			13	deriv	GBA_PD	iPD	14	12	77	0.742	0.742	ns
		13	deriv	GBA_PD	LRRK2_PD	16	14	191	0.000611	0.003	**			13	deriv	GBA_PD	LRRK2_PD	14	13	72	0.375	0.564	ns
		13	deriv	iPD	LRRK2_PD	17	14	134	0.570000	0.570	ns			13	deriv	iPD	LRRK2_PD	12	13	69	0.650	0.742	ns
		14	deriv	Control	GBA_PD	18	16	75	0.017	0.050	ns			14	deriv	Control	GBA_PD	13	14	69	0.302	0.453	ns
		14	deriv	Control	iPD	18	17	148	0.883	0.883	ns			14	deriv	Control	iPD	13	12	56	0.247	0.453	ns
		14	deriv	Control	LRRK2_PD	18	14	145	0.488	0.592	ns			14	deriv	Control	LRRK2_PD	13	13	41	0.026	0.154	ns
		14	deriv	GBA_PD	iPD	16	17	197	0.028	0.056	ns			14	deriv	GBA_PD	iPD	14	12	77	0.742	0.742	ns
		14	deriv	GBA_PD	LRRK2_PD	16	14	174	0.009	0.050	ns			14	deriv	GBA_PD	LRRK2_PD	14	13	63	0.185	0.453	ns
		14	deriv	iPD	LRRK2_PD	17	14	137	0.493	0.592	ns			14	deriv	iPD	LRRK2_PD	12	13	65	0.503	0.604	ns
		15	deriv	Control	GBA_PD	18	16	148	0.905	0.905	ns			15	deriv	Control	GBA_PD	13	14	78	0.550	0.825	ns
		15	deriv	Control	iPD	18	17	146	0.832	0.905	ns			15	deriv	Control	iPD	13	12	76	0.936	0.936	ns
		15	deriv	Control	LRRK2_PD	18	14	93	0.220	0.660	ns			15	deriv	Control	LRRK2_PD	13	13	59	0.204	0.825	ns
		15	deriv	GBA_PD	iPD	16	17	123	0.657	0.905	ns			15	deriv	GBA_PD	iPD	14	12	90	0.781	0.936	ns
		15	deriv	GBA_PD	LRRK2_PD	16	14	81	0.208	0.660	ns			15	deriv	GBA_PD	LRRK2_PD	14	13	74	0.430	0.825	ns
		15	deriv	iPD	LRRK2_PD	17	14	99	0.444	0.888	ns			15	deriv	iPD	LRRK2_PD	12	13	62	0.406	0.825	ns
		16	deriv	Control	GBA_PD	18	16	167	0.443	0.664	ns			16	deriv	Control	GBA_PD	13	14	98	0.756	0.756	ns
		16	deriv	Control	iPD	18	17	167	0.660	0.792	ns			16	deriv	Control	iPD	13	12	100	0.247	0.695	ns
		16	deriv	Control	LRRK2_PD	18	14	85	0.125	0.250	ns			16	deriv	Control	LRRK2_PD	13	13	96	0.579	0.695	ns
		16	deriv	GBA_PD	iPD	16	17	132	0.901	0.901	ns			16	deriv	GBA_PD	iPD	14	12	109	0.212	0.695	ns
		16	deriv	GBA_PD	LRRK2_PD	16	14	65	0.052	0.250	ns			16	deriv	GBA_PD	LRRK2_PD	14	13	106	0.488	0.695	ns
		16	deriv	iPD	LRRK2_PD	17	14	76	0.092	0.250	ns			16	deriv	iPD	LRRK2_PD	12	13	64	0.470	0.695	ns
		17	deriv	Control	GBA_PD	18	16	95	0.095	0.189	ns			17	deriv	Control	GBA_PD	13	14	97	0.793	0.793	ns
		17	deriv	Control	iPD	18	17	194	0.184	0.276	ns			17	deriv	Control	iPD	13	12	115	0.046	0.137	ns
		17	deriv	Control	LRRK2_PD	18	14	150	0.377	0.452	ns			17	deriv	Control	LRRK2_PD	13	13	110	0.204	0.296	ns
		17	deriv	GBA_PD	iPD	16	17	205	0.012	0.037	*			17	deriv	GBA_PD	iPD	14	12	131	0.015	0.089	ns
		17	deriv	GBA_PD	LRRK2_PD	16	14	179	0.004	0.027	*			17	deriv	GBA_PD	LRRK2_PD	14	13	120	0.169	0.296	ns
		17	deriv	iPD	LRRK2_PD	17	14	115	0.891	0.891	ns			17	deriv	iPD	LRRK2_PD	12	13	56	0.247	0.296	ns
		18	deriv	Control	GBA_PD	18	16	68	0.008	0.016	*			18	deriv	Control	GBA_PD	13	14	74	0.430	0.550	ns
		18	deriv	Control	iPD	18	17	170	0.590	0.866	ns			18	deriv	Control	iPD	13	12	105	0.152	0.304	ns
		18	deriv	Control	LRRK2_PD	18	14	136	0.722	0.866	ns			18	deriv	Control	LRRK2_PD	13	13	82	0.920	0.920	ns
		18	deriv	GBA_PD	iPD	16	17	214	0.004	0.013	*			18	deriv	GBA_PD	iPD	14	12	130	0.017	0.104	ns
		18	deriv	GBA_PD	LRRK2_PD	16	14	187	0.001	0.007	**			18	deriv	GBA_PD	LRRK2_PD	14	13	107	0.458	0.550	ns
		18	deriv	iPD	LRRK2_PD	17	14	116	0.922	0.922	ns			18	deriv	iPD	LRRK2_PD	12	13	41	0.046	0.137	ns
		19	deriv	Control	GBA_PD	18	16	89	0.059	0.178	ns			19	deriv	Control	GBA_PD	13	14	61	0.155	0.290	ns
		19	deriv	Control	iPD	18	17	141	0.708	0.850	ns			19	deriv	Control	iPD	13	12	68	0.611	0.611	ns
		19	deriv	Control	LRRK2_PD	18	14	76	0.059	0.178	ns			19	deriv	Control	LRRK2_PD	13	13	36	0.012	0.048	*
		19	deriv	GBA_PD	iPD	16	17	170	0.231	0.347	ns			19	deriv	GBA_PD	iPD	14	12	110	0.193	0.290	ns
		19	deriv	GBA_PD	LRRK2_PD	16	14	108	0.886	0.886	ns			19	deriv	GBA_PD	LRRK2_PD	14	13	68	0.280	0.336	ns
		19	deriv	iPD	LRRK2_PD	17	14	79	0.118	0.236	ns			19	deriv	iPD	LRRK2_PD	12	13	34	0.016	0.048	*
		20	deriv	Control	GBA_PD	18	16	102	0.154	0.231	ns			20	deriv	Control	GBA_PD	13	14	68	0.280	0.336	ns
		20	deriv	Control	iPD	18	17	128	0.424	0.509	ns			20	deriv	Control	iPD	13	12	51	0.152	0.228	ns
		20	deriv	Control	LRRK2_PD	18	14	54	0.005	0.032	*			20	deriv	Control	LRRK2_PD	13	13	35	0.010	0.061	ns
		20	deriv	GBA_PD	iPD	16	17	145	0.763	0.763	ns			20	deriv	GBA_PD	iPD	14	12	82	0.940	0.940	ns
		20	deriv	GBA_PD	LRRK2_PD	16	14	77	0.154	0.231	ns			20	deriv	GBA_PD	LRRK2_PD	14	13	50	0.048	0.145	ns
		20	deriv	iPD	LRRK2_PD	17	14	70	0.053	0.160	ns			20	deriv	iPD	LRRK2_PD	12	13	47	0.098	0.195	ns
														21	deriv	Control	GBA_PD	13	14	90	0.981	0.981	ns
														21	deriv	Control	iPD	13	12	63	0.437	0.655	ns
														21	deriv	Control	LRRK2_PD	13	13	66	0.362	0.655	ns
														21	deriv	GBA_PD	iPD	14	12	62	0.274	0.655	ns
														21	deriv	GBA_PD	LRRK2_PD	14	13	69	0.302	0.655	ns
														21	deriv	iPD	LRRK2_PD	12	13	77	0.979	0.981	ns
														22	deriv	Control	GBA_PD	13	14	99	0.720	0.96	ns
														22	deriv	Control	iPD	13	12	73	0.810	0.96	ns
														22	deriv	Control	LRRK2_PD	13	13	86	0.960	0.96	ns
														22	deriv	GBA_PD	iPD	14	12	71	0.527	0.96	ns
														22	deriv	GBA_PD	LRRK2_PD	14	13	88	0.905	0.96	ns
														22	deriv	iPD	LRRK2_PD	12	13	90	0.538	0.96	ns
														23	deriv	Control	GBA_PD	13	14	86	0.830	0.96	ns
														23	deriv	Control	iPD	13	12	74	0.852	0.96	ns
														23	deriv	Control	LRRK2_PD	13	13	86	0.960	0.96	ns
														23	deriv	GBA_PD	iPD	14	12	81	0.899	0.96	ns
														23	deriv	GBA_PD	LRRK2_PD	14	13	99	0.720	0.96	ns
														23	deriv	iPD	LRRK2_PD	12	13	89	0.574	0.96	ns
														24	deriv	Control	GBA_PD	13	14	73	0.402	0.936	ns
														24	deriv	Control	iPD	13	12	70	0.689	0.936	ns
														24	deriv	Control	LRRK2_PD	13	13	79	0.801	0.936	ns
														24	deriv	GBA_PD	iPD	14	12	90	0.781	0.936	ns
														24	deriv	GBA_PD	LRRK2_PD	14	13	100	0.685	0.936	ns
														24	deriv	iPD	LRRK2_PD	12	13	80	0.936	0.936	ns
														25	deriv	Control	GBA_PD	13	14	62	0.169	0.864	ns
														25	deriv	Control	iPD	13	12	66	0.538	0.864	ns
														25	deriv	Control	LRRK2_PD	13	13	73	0.579	0.864	ns
														25	deriv	GBA_PD	iPD	14	12	99	0.462	0.864	ns
														25	deriv	GBA_PD	LRRK2_PD	14	13	99	0.720	0.864	ns
														25	deriv	iPD	LRRK2_PD	12	13	76	0.936	0.936	ns

## Sheet: AUC_Kruskal_Wallis
AUC ANALYSIS OF GAM FITTED FLUORESCENCE FOR BASELINE TMRM
K-W AUC
.y.	n	statistic	df	p	method
auc	65	11.2308	3	0.0105	Kruskal-Wallis
AUC_Wilcoxon_Pairewise
.y.	group1	group2	n1	n2	statistic	p	p.adj	p.adj.signif
auc	Control	GBA_PD	18	16	212	0.018	0.055	ns
auc	Control	iPD	18	17	156	0.935	0.935	ns
auc	Control	LRRK2_PD	18	14	203	0.003	0.016	*
auc	GBA_PD	iPD	16	17	88	0.087	0.131	ns
auc	GBA_PD	LRRK2_PD	16	14	140	0.257	0.308	ns
auc	iPD	LRRK2_PD	17	14	171	0.04	0.079	ns
