# Supplementary material for: Integrated Stress Response Signatures Drive Monocyte Dysfunction in GBA1- and LRRK2-Linked Parkinson’s Disease
Source: Research Square preprint supplement (doi:10.21203/rs.3.rs-8615050/v1), 2026-02-16
Supplement: Supplementary file 2 [file 55768ffd0b0749f75334edfa.pdf]

# Integrated Stress Response Signatures Drive Monocyte Dysfunction in *GBA1*- and *LRRK2*-Linked Parkinson's Disease

**Authors:** Daniele Mattei<sup>1-4#</sup>, Erica Brophy<sup>1-4#</sup>, Mikaela Rosen<sup>1-4</sup>, Oriol Narcis Majos<sup>1-4</sup>, Aloysius Domingo<sup>5,6</sup>, Elena Meijia<sup>1-4</sup>, Claudia De Sanctis<sup>11,12</sup>, Beomjin Jang<sup>1-4</sup>, Tarek Khashan<sup>1-4</sup>, Mengxi Yang<sup>7,8</sup>, Deborah Raymond<sup>7,8</sup>, Casey Young<sup>7,8</sup>, Jack Humphrey<sup>1-4</sup>, Elisa Navarro<sup>1-4,10</sup>, , Amanda Allan<sup>1-4</sup>, Katherine Leaver<sup>7,8</sup>, Viktoriya Katsnelson<sup>7,8</sup>, Alexander Chung<sup>1-4</sup>, Benjamin Muller<sup>1-4</sup>, Matthew Swan<sup>7,8</sup>, Vicki L. Shanker<sup>7,8</sup>, Mariel Pullman<sup>7,8</sup>, Adina Wise<sup>7,8</sup>, Roberto Ortega<sup>7,8</sup>, Kelly Astudillo<sup>9</sup>, Steven Frucht<sup>9</sup>, Susan Bressman<sup>7,8</sup>, Giulietta Riboldi<sup>9</sup>, Laurie J. Ozelius<sup>5,6</sup>, Rachel Saunders-Pullman<sup>7,8</sup>, Towfique Raj<sup>1-4,7\*</sup>

## Affiliations:

<sup>1</sup>Department of Genetics and Genomic Sciences, Icahn School of Medicine at Mount Sinai, New York, NY, USA.

<sup>2</sup>Nash Family Department of Neuroscience & Friedman Brain Institute, Icahn School of Medicine at Mount Sinai, New York, NY, USA.

<sup>3</sup>Ronald M. Loeb Center for Alzheimer's Disease, Icahn School of Medicine at Mount Sinai, New York, NY, USA.

<sup>4</sup>Icahn Genomics Institute, Icahn School of Medicine at Mount Sinai, New York, NY, USA.

<sup>5</sup>Department of Neurology, Massachusetts General Hospital and Harvard Medical School, Boston, MA 02114, USA.

<sup>6</sup>Center for Genomic Medicine, Massachusetts General Hospital, Boston, MA 02114, USA.

Program in Medical and Population Genetics, Broad Institute, Cambridge, MA 02142, USA.

<sup>7</sup>Department of Neurology, Icahn School of Medicine at Mount Sinai and Mount Sinai Beth Israel, New York, NY, USA.

<sup>8</sup>Bonnie and Tom Strauss Movement Disorders Center, Icahn School of Medicine at Mount Sinai, New York, NY, USA.

<sup>9</sup>The Marlene and Paolo Fresco Institute for Parkinson's and Movement Disorders, Department of Neurology, NYU Langone Health, New York City, New York, USA.

<sup>10</sup>Neurochemistry Research Institute, Department of Biochemistry and Molecular Biology, School of Medicine, Complutense University of Madrid, 28040 Madrid, Spain.

<sup>11</sup>Department of Pathology, Friedman Brain Institute, Icahn School of Medicine at Mount Sinai, New York, NY, 10029, USA.

<sup>12</sup>Nash Family Department of Neuroscience, Department of Psychiatry, Friedman Brain Institute, Icahn School of Medicine at Mount Sinai, New York, NY, USA.

## #Contributed Equally

## \*Corresponding authors:

Towfique Raj [towfique.raj@mssm.edu](mailto:towfique.raj@mssm.edu); Icahn School of Medicine at Mount Sinai, New York, NY, USA.

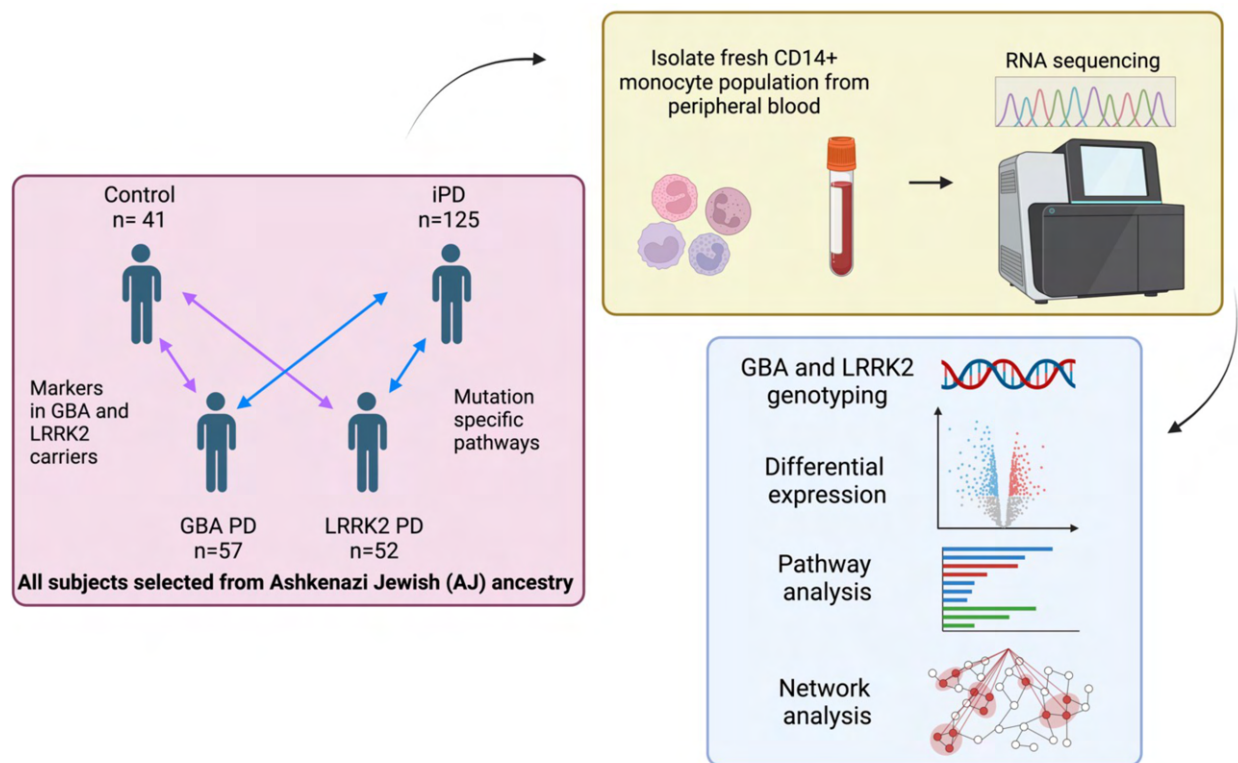

**Supplementary Fig. 1 | Project design schematic representation.** Schematic representation of project design and rationale for the comparison of the selected cohorts and analysis of biological samples in monocytes. Fresh CD14+ monocytes were isolated from peripheral blood within 3 hours of blood drawn from 233 donors with neurological diseases, as well as 41 unaffected subjects (controls) generating a total of 274 samples. Genome-wide genotyping was performed using DNA isolated from all donors and all subjects are from Ashkenazi Jewish European ancestry. The following analyses were performed with this dataset: (i) differential expression analysis; (ii) weighted gene co-expression analysis; (iii) gene set enrichment analysis.

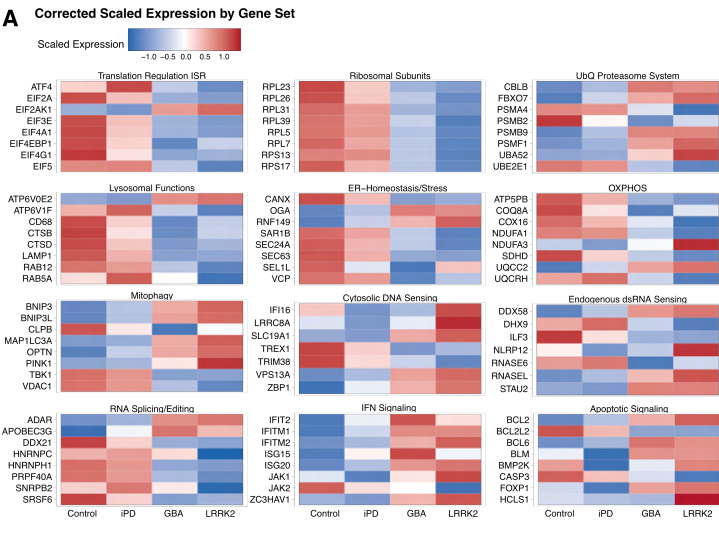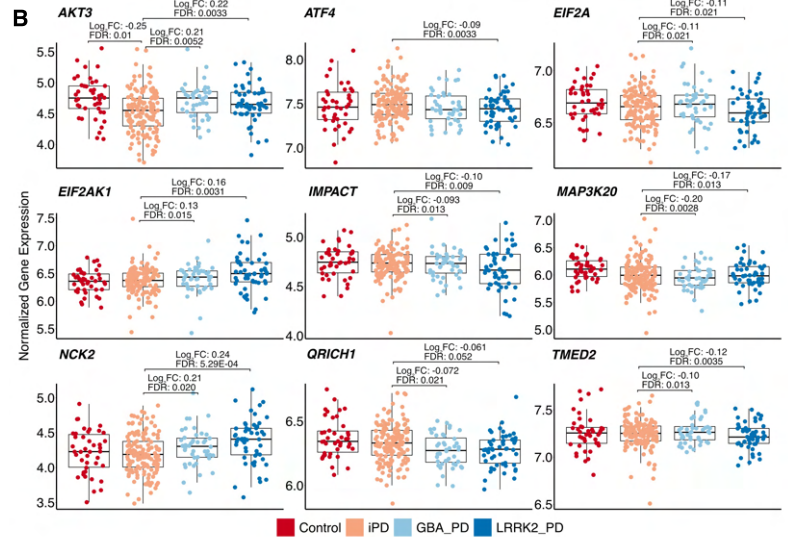

**Supplementary Fig. 2 | (A)** Heatmaps comparing the corrected, scaled SVA expression key genes associated with the biological processes significantly deregulated in GBA1- and LRRK2-PD monocytes relative to iPD (resolved from Fig. 1F). All displayed genes were significantly differentially expressed in either or both GBA1- and LRRK2-PD monocytes (FDR < 0.05, method = BH). Scaled expression is defined as z-score-transformed mean expression per gene, calculated by centering and standardizing SVA-corrected normalized expression. **(B)** Boxplots comparing the SVA corrected expression of core genes involved in the integrated stress response (ISR) signaling. Displayed genes are from the gene ontology term GO:0140467 (ISR signaling).

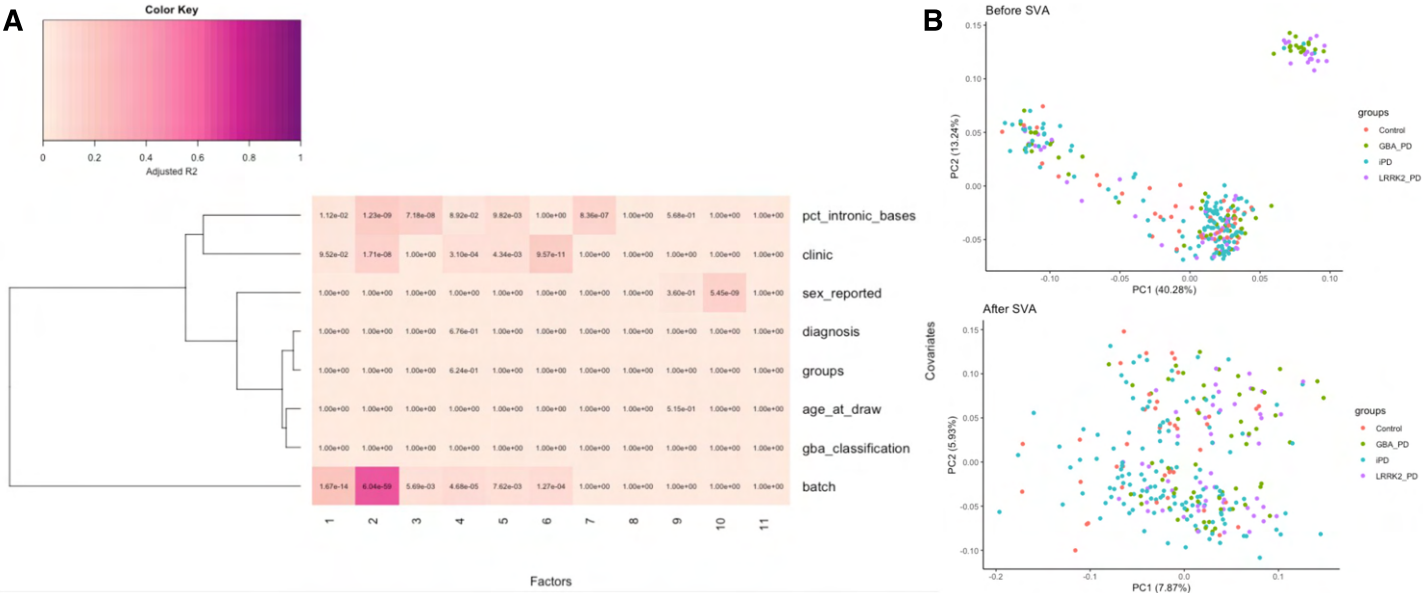

**Supplementary Fig. 3 | Covariate selection and correlation with possible confounders. (A)** Heatmap showing the correlation of the first 11 SVs (x-axis) and the known covariates (y-axis). **(B)** Scatter plot showing the results from the principal component (PC) analysis before and after surrogate variable analysis (SVA).

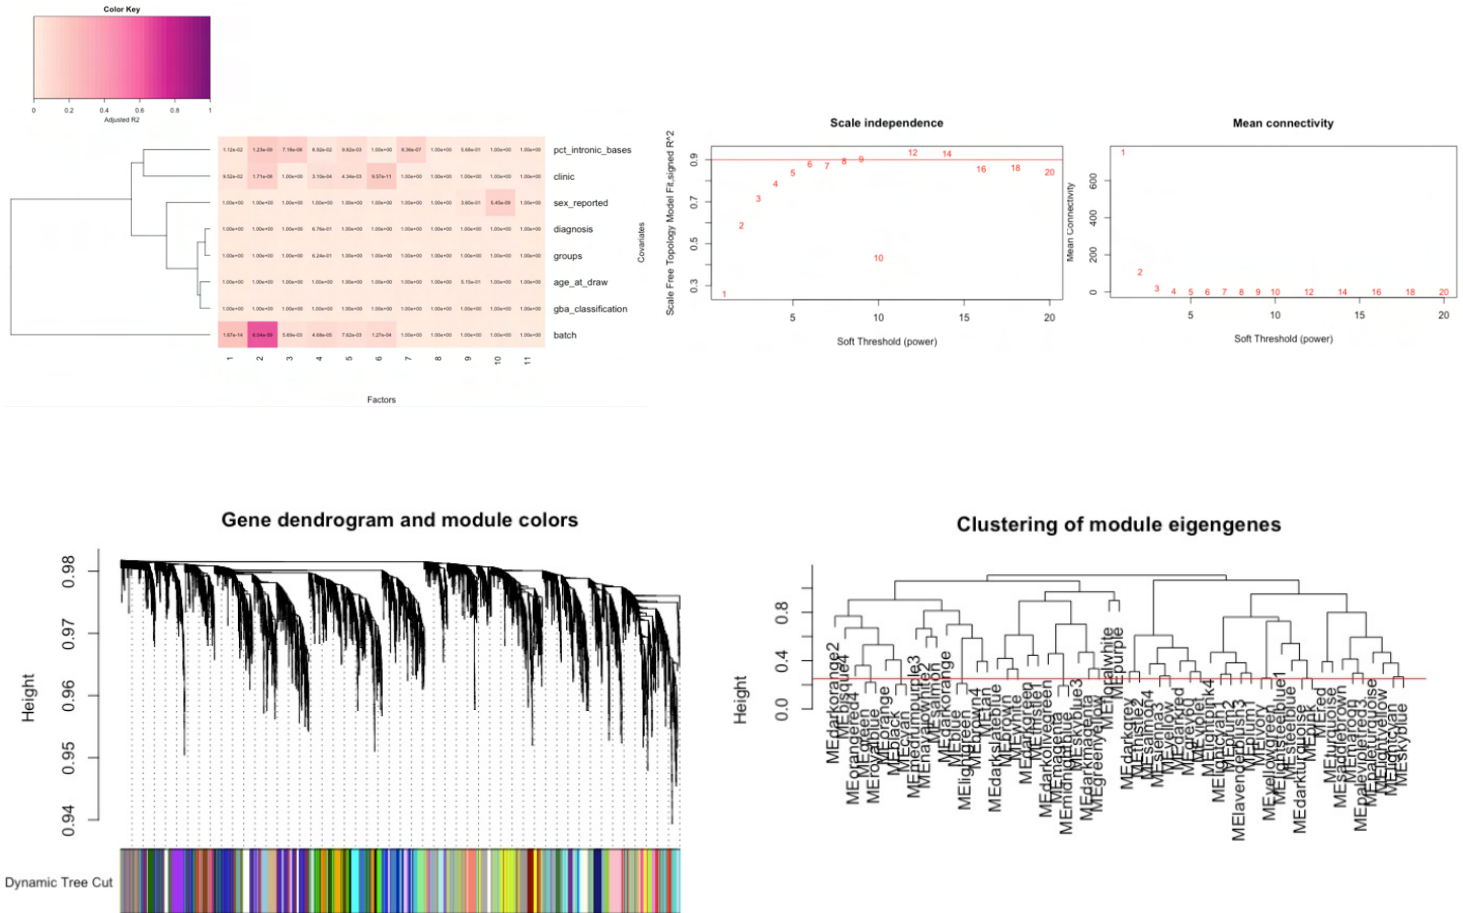

### Supplementary Fig. 4 | Gene network construction in human monocytes using WGCNA.

53 unique co-expression modules were obtained using WGCNA. **(A)** Heatmap showing the correlation of the first 11 SVs (x-axis) and the known covariates (y-axis). **(B)** Right: Evaluation of network topology with different soft-thresholding powers. The y-axis represents the scale-free fit index as a function of the soft-thresholding power (x-axis). Left: The mean connectivity (y-axis) as a function of the soft-thresholding power. **(C)** Gene dendrogram using “Dynamic Tree Cut” to assign genes to different modules and modules to colors, showing before and after collapsing modules into 65 final networks. **(D)** Module eigengenes clustering dendrogram based on topological overlap. Modules below the threshold (Module Dissimilarity = 0.25) indicated by the red line were merged. These values correspond to a correlation of 0.75.

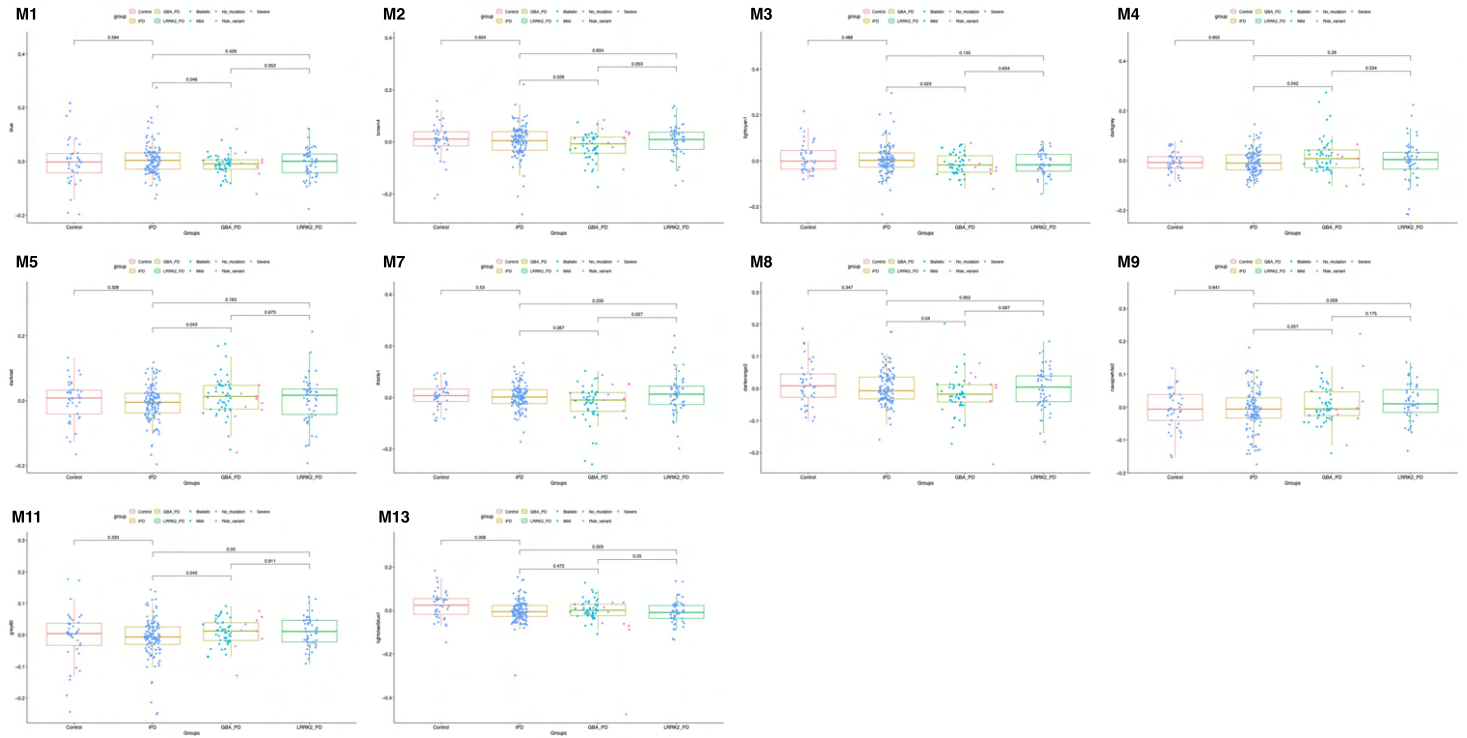

**Supplementary Fig. 5 | Modules Eigengene expression comparison between groups.** Boxplots show eigengene expressions for all modules except M6, M10 and M12, displayed in Fig. 3B. Boxplots indicate median, quartiles, and whiskers (1.5× IQR). Eigengene expression was compared via Wilcoxon sum-rank test, nominal p-value thresholds: \*p ≤ 0.05, \*\*p ≤ 0.01, \*\*\*p ≤ 0.001.



**A**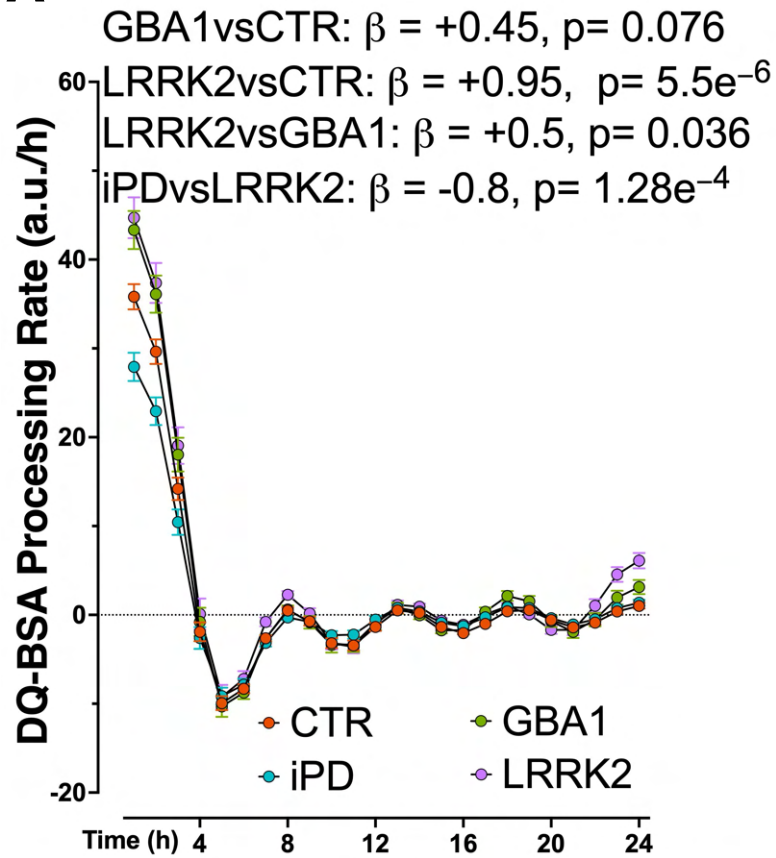**B**

| Wilcoxon test  |         |       |
|----------------|---------|-------|
| Time Point (h) | CTR Vs. | FDR   |
| 1              | GBA1    | 0.01  |
| 1              | iPD     | 0.001 |
| 1              | LRRK2   | 0.013 |
| 2              | GBA1    | 0.039 |
| 2              | iPD     | 0.005 |
| 2              | LRRK2   | 0.032 |
| 7              | LRRK2   | 0.012 |
| 8              | LRRK2   | 0.005 |
| 14             | LRRK2   | 0.046 |
| 15             | GBA1    | 0.014 |
| 15             | iPD     | 0.014 |
| 15             | LRRK2   | 0.006 |
| 16             | iPD     | 0.016 |
| 16             | LRRK2   | 0.036 |
| 18             | GBA1    | 0.007 |
| 20             | GBA1    | 0.049 |
| 20             | LRRK2   | 0.001 |
| 22             | LRRK2   | 0.012 |
| 23             | GBA1    | 0.003 |
| 23             | LRRK2   | 0.000 |
| 24             | GBA1    | 0.001 |
| 24             | LRRK2   | 0.000 |

**Supplementary Fig. 6 | Altered lysosomal proteolysis rates in PD monocyte-derived macrophages (MDMs) measured with DQ-BSA. (A)** Time course of covariate-adjusted DQ-BSA processing rates (a.u./h; mean  $\pm$  SEM) in MDMs from controls (CTR), GBA1-PD, iPD and LRRK2-PD patients over 24 h. Rates were obtained as time-derivatives of generalized additive model (GAM)-fitted fluorescence trajectories, and compared between groups using linear mixed-effects models with donor as a random effect and age, clinic, ancestry, weeks frozen and assay date as covariates. Text reports slope (group $\times$ time) contrasts versus the indicated reference group ( $\beta$ , a.u./h;  $p$ ). **(B)** Significant per-time-point differences in DQ-BSA processing rates between CTR and each PD subgroup, assessed by Wilcoxon rank-sum tests with Benjamini–Hochberg FDR correction; table lists time (h), comparison and FDR-adjusted  $q$ -values.

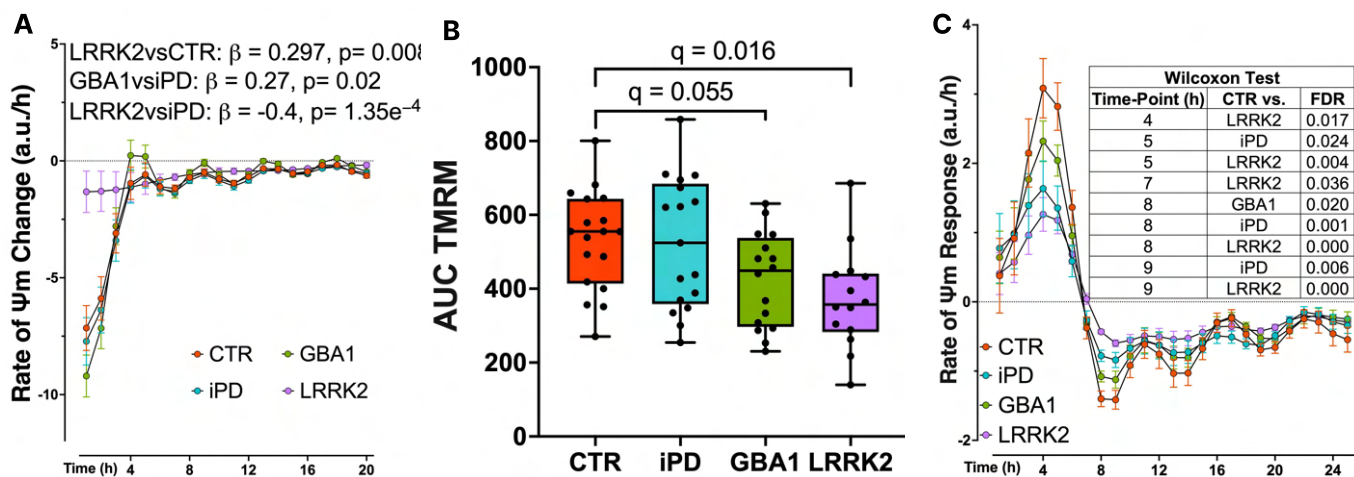

**Supplementary Fig. 6 | Mitochondrial membrane potential dynamics in PD monocyte-derived macrophages.** **(A)** Time course of covariate-adjusted rates of change in TMRM fluorescence ( $\Delta\Psi_m$ ; a.u./h, mean  $\pm$  SEM) in monocyte-derived macrophages (MDMs) from controls (CTR), GBA1-PD, iPD and LRRK2-PD patients at baseline. Rates were obtained as first derivatives of generalized additive model (GAM)-fitted TMRM trajectories and compared between groups with linear mixed-effects models. Text reports slope (group $\times$ time) contrasts between the indicated groups ( $\beta$ , a.u./h;  $p$ ). **(B)** Box-and-whisker plots (min–max, line = median; each point = one donor) of subject-level TMRM area under the curve AUC at baseline. Group differences were assessed by Kruskal-Wallis test followed by pairwise Wilcoxon rank-sum tests with Benjamini–Hochberg FDR correction;  $q$ -values are shown above brackets. **(C)** Detailed time course of  $\Delta\Psi_m$  response rates (a.u./h, mean  $\pm$  SEM) following 100  $\mu$ M ADP, with accompanying table listing time points (h) at which CTR differed from each PD subgroup by Wilcoxon rank-sum tests (FDR-adjusted  $q$ -values).
