# Supplementary material for: Integrated Stress Response Signatures Drive Monocyte Dysfunction in GBA1- and LRRK2-Linked Parkinson’s Disease
Source: Research Square preprint supplement (doi:10.21203/rs.3.rs-8615050/v1), 2026-02-16
Supplement: Supplementary file 4 [file 7bb2146393aff83e66173606.xlsx]

## Sheet: README
Table 1:	Metadata for all monocyte samples.
Table 2:	Full summary statistics from monocyte differential gene expression between GBA-PD and iPD
Table 3:	Monocyte Gene Set Enrichment Analysis (GSEA) results for all gene sets FDR < 0.05 (GBA-PD vs iPD))
Table 4:	Full summary statistics from monocyte differential gene expression between LRRK2-PD and iPD
Table 5:	Monocyte GSEA for all gene sets FDR < 0.05 (LRRK2-PD vs iPD))
Table 6:	Full summary statistics from monocyte differential gene expression between iPD and controls
Table 7:	Full summary statistics from the monocyte differentially expressed genes overlapping between GBA-PD and LRRK2-PD relative to iPD
Table 8:	Monocyte GSEA results for the differentialy expressed genes overlapping between GBA-PD and LRRK2-PD relative to iPD
Table 9:	List of genes specifically differentially expressed in LRRK2-PD monocytes relative to iPD
Table 10:	GSEA results for the genes specifically differentially expressed in LRRK2-PD monocytes relative to iPD
Table 11:	List of genes specifically differentially expressed in GBA-PD monocytes relative to iPD

## Sheet: Table_1 Monocyte_Metadata
Sample_id	donor_id	Age_at_Draw	Sex_reported	batch	clinic	RNA_Box	Processed_By	PCT_INTRONIC_BASES	Diagnosis	GBA_classification	groups
ADRC86855-01	ADRC86855	63	Female	batch_1	ADRC	Library_Prep_RNA_1-73	HIMC	36.4768	Control	No_mutation	Control
ADRC50636-01	ADRC50636	66	Female	batch_1	ADRC	Library_Prep_RNA_1-73	HIMC	27.9168	Control	No_mutation	Control
ADRC96322-01	ADRC96322	76	Female	batch_1	ADRC	Library_Prep_RNA_1-73	Unknown	24.3281	Control	No_mutation	Control
ADRC111-01	ADRC111	67	Female	batch_1	ADRC	Library_Prep_RNA_1-73	HIMC	31.485	Control	No_mutation	Control
NYUMD0006-01	NYUMD0006	69	Female	batch_1	NYUMD	NYUMD_RNA_Seq_Box_1	HIMC	21.7397	PD	Mild	GBA_PD
NYUMD0008-01	NYUMD0008	59	Female	batch_1	NYUMD	NYUMD_RNA_Seq_Box_1	HIMC	13.6863	PD	Mild	GBA_PD
NYUMD0009-01	NYUMD0009	74	Female	batch_1	NYUMD	NYUMD_RNA_Seq_Box_1	HIMC	17.1371	PD	No_mutation	LRRK2_PD
NYUMD0010-01	NYUMD0010	48	Male	batch_1	NYUMD	NYUMD_RNA_Seq_Box_1	HIMC	17.0437	PD	Mild	GBA_PD
NYUMD0016-01	NYUMD0016	66	Male	batch_1	NYUMD	NYUMD_RNA_Seq_Box_1	HIMC	25.5542	PD	No_mutation	iPD
NYUMD0021-01	NYUMD0021	28	Female	batch_1	NYUMD	Unknown	HIMC	20.4029	PD	Mild	GBA_PD
NYUMD0024-01	NYUMD0024	75	Male	batch_1	NYUMD	Unknown	HIMC	26.5899	PD	No_mutation	iPD
NYUMD0027-01	NYUMD0027	77	Male	batch_1	NYUMD	Unknown	HIMC	22.6295	PD	Mild	GBA_PD
NYUMD0029-01	NYUMD0029	65	Male	batch_2	NYUMD	Unknown	HIMC	38.8295	PD	No_mutation	iPD
NYUMD0030-01	NYUMD0030	67	Male	batch_1	NYUMD	Unknown	Unknown	17.6373	PD	No_mutation	iPD
NYUMD0031-01	NYUMD0031	80	Male	batch_1	NYUMD	NYUMD_RNA_Seq_Box_1	Unknown	12.6899	PD	No_mutation	iPD
NYUMD0043-01	NYUMD0043	70	Male	batch_1	NYUMD	NYUMD_RNA_Seq_Box_1	Unknown	11.0475	PD	No_mutation	iPD
NYUMD0046-01	NYUMD0046	59	Female	batch_1	NYUMD	NYUMD_RNA_Seq_Box_1	Unknown	16.5809	PD	Mild	GBA_PD
NYUMD0047-01	NYUMD0047	60	Male	batch_1	NYUMD	NYUMD_RNA_Seq_Box_1	Unknown	14.9307	Control	No_mutation	Control
NYUMD0055-01	NYUMD0055	75	Female	batch_2	NYUMD	Unknown	Unknown	22.7245	PD	No_mutation	iPD
NYUMD0057-01	NYUMD0057	79	Male	batch_2	NYUMD	Unknown	Unknown	23.7721	PD	No_mutation	iPD
NYUMD0061-01	NYUMD0061	75	Female	batch_2	NYUMD	Unknown	Unknown	36.6023	PD	No_mutation	iPD
NYUMD0062-01	NYUMD0062	72	Female	batch_1	NYUMD	NYUMD_RNA_Seq_Box_1	Unknown	21.6222	PD	No_mutation	iPD
NYUMD0064-01	NYUMD0064	68	Male	batch_1	NYUMD	Unknown	Unknown	28.4698	PD	No_mutation	iPD
NYUMD0065-01	NYUMD0065	71	Male	batch_1	NYUMD	NYUMD_RNA_Seq_Box_1	Unknown	27.291	Control	No_mutation	Control
NYUMD0072-01	NYUMD0072	71	Male	batch_1	NYUMD	NYUMD_RNA_Seq_Box_1	Unknown	22.7233	PD	No_mutation	iPD
NYUMD0073-01	NYUMD0073	66	Female	batch_2	NYUMD	Unknown	Unknown	44.6094	PD	No_mutation	LRRK2_PD
NYUMD0075-01	NYUMD0075	56	Female	batch_1	NYUMD	Unknown	Unknown	24.1782	Control	No_mutation	Control
NYUMD0076-01	NYUMD0076	83	Male	batch_1	NYUMD	Unknown	Unknown	23.3051	PD	No_mutation	iPD
NYUMD0079-01	NYUMD0079	57	Male	batch_1	NYUMD	Unknown	Unknown	11.3684	Control	No_mutation	Control
NYUMD0097-01	NYUMD0097	62	Female	batch_1	NYUMD	NYUMD_RNA_Seq_Box_1	Unknown	23.0904	PD	Mild	GBA_PD
NYUMD0100-01	NYUMD0100	77	Male	batch_2	NYUMD	Unknown	Unknown	38.0565	PD	No_mutation	iPD
NYUMD0101-01	NYUMD0101	74	Female	batch_1	NYUMD	NYUMD_RNA_Seq_Box_1	Unknown	23.6626	Control	No_mutation	Control
NYUMD0111-01	NYUMD0111	68	Female	batch_1	NYUMD	Unknown	Unknown	32.2664	PD	Mild	GBA_PD
NYUMD0117-01	NYUMD0117	71	Male	batch_2	NYUMD	Unknown	Unknown	48.0507	Control	No_mutation	Control
NYUMD0129-01	NYUMD0129	78	Female	batch_2	NYUMD	Unknown	Unknown	42.643	PD	No_mutation	iPD
NYUMD0133-01	NYUMD0133	71	Female	batch_2	NYUMD	Unknown	Unknown	29.7035	PD	No_mutation	iPD
NYUMD0134-01	NYUMD0134	65	Female	batch_2	NYUMD	Unknown	Unknown	35.1783	PD	No_mutation	iPD
NYUMD0136-01	NYUMD0136	73	Male	batch_2	NYUMD	Unknown	Unknown	32.022	PD	No_mutation	iPD
NYUMD0149-01	NYUMD0149	69	Male	batch_2	NYUMD	Unknown	Unknown	50.4665	Control	No_mutation	Control
NYUMD0152-01	NYUMD0152	76	Male	batch_2	NYUMD	Unknown	Unknown	24.3086	PD	No_mutation	LRRK2_PD
NYUMD0171-01	NYUMD0171	56	Female	batch_2	NYUMD	Unknown	Unknown	44.3656	PD	Mild	GBA_PD
NYUMD0172-01	NYUMD0172	50	Male	batch_2	NYUMD	Unknown	Maojuan	49.4134	PD	Mild	GBA_PD
NYUMD0178-01	NYUMD0178	69	Female	batch_2	NYUMD	Unknown	Maojuan	29.9445	PD	Risk_variant	NA
NYUMD0182-01	NYUMD0182	28	Male	batch_2	NYUMD	Unknown	Maojuan	40.6175	Control	No_mutation	Control
NYUMD0183-01	NYUMD0183	69	Male	batch_2	NYUMD	Unknown	Amanda	47.8746	PD	No_mutation	iPD
NYUMD0184-01	NYUMD0184	67	Female	batch_2	NYUMD	Unknown	Amanda	53.8765	Control	No_mutation	Control
NYUMD0185-01	NYUMD0185	69	Male	batch_2	NYUMD	Unknown	Maojuan	51.4488	PD	No_mutation	iPD
NYUMD0187-01	NYUMD0187	68	Female	batch_2	NYUMD	Unknown	Maojuan	45.727	Control	No_mutation	Control
NYUMD0186-01	NYUMD0186	74	Female	batch_2	NYUMD	Unknown	Maojuan	53.3186	Control	No_mutation	Control
NYUMD0190-01	NYUMD0190	47	Female	batch_2	NYUMD	Unknown	Maojuan	53.5293	PD	Mild	GBA_PD
NYUMD0194-01	NYUMD0194	76	Female	batch_2	NYUMD	Unknown	Maojuan	55.8451	PD	No_mutation	iPD
NYUMD0195-01	NYUMD0195	78	Male	batch_2	NYUMD	Unknown	Maojuan	32.3132	Control	No_mutation	Control
NYUMD0196-01	NYUMD0196	76	Female	batch_2	NYUMD	Unknown	Maojuan	33.5678	PD	No_mutation	iPD
NYUMD0197-01	NYUMD0197	77	Male	batch_2	NYUMD	Unknown	Maojuan	42.0461	PD	No_mutation	iPD
NYUMD0198-01	NYUMD0198	65	Female	batch_2	NYUMD	Unknown	Maojuan	29.3931	Control	No_mutation	Control
NYUMD0199-01	NYUMD0199	48	Male	batch_2	NYUMD	Unknown	Maojuan	40.8345	PD	No_mutation	iPD
MSMD0026-01	MSMD0026	68	Male	batch_1	MSMD	Unknown	Unknown	18.5978	PD	No_mutation	iPD
MSMD0027-01	MSMD0027	59	Male	batch_1	MSMD	Unknown	Unknown	9.5764	PD	No_mutation	LRRK2_PD
MSMD0037-01	MSMD0037	57	Female	batch_1	MSMD	Unknown	Unknown	33.576	PD	No_mutation	LRRK2_PD
MSMD0042-01	MSMD0042	77	Male	batch_1	MSMD	Unknown	Unknown	36.4146	PD	No_mutation	iPD
MSMD0043-01	MSMD0043	72	Female	batch_1	MSMD	Unknown	Unknown	32.2123	Control	No_mutation	Control
MSMD0046-01	MSMD0046	72	Male	batch_1	MSMD	Unknown	Unknown	35.0423	PD	No_mutation	iPD
MSMD0067-01	MSMD0067	69	Male	batch_1	MSMD	Unknown	Unknown	12.9378	Control	No_mutation	Control
MSMD0069-01	MSMD0069	65	Female	batch_1	MSMD	Unknown	Unknown	19.059	Control	No_mutation	Control
MSMD0078-01	MSMD0078	67	Male	batch_1	MSMD	Unknown	Unknown	17.1412	PD	No_mutation	LRRK2_PD
MSMD0098-01	MSMD0098	64	Female	batch_1	MSMD	Unknown	Unknown	39.1782	Control	No_mutation	Control
MSMD0171-01	MSMD0171	68	Female	batch_1	MSMD	MSMD RNA Box 1_RNA Library Prep 74-173	Unknown	33.3813	PD	No_mutation	iPD
MSMD0185-01	MSMD0185	76	Female	batch_1	MSMD	MSMD RNA Box 1_RNA Library Prep 74-173	Unknown	13.8926	PD	Severe	NA
MSMD0192-01	MSMD0192	59	Male	batch_1	MSMD	RNA Library Prep 74-173	Unknown	14.6831	PD	No_mutation	iPD
MSMD0202-01	MSMD0202	66	Female	batch_1	MSMD	MSMD RNA Box 1_RNA Library 174-	Unknown	14.7909	PD	No_mutation	iPD
CCH0001-01	CCH0001	61	Male	batch_1	CCH	RNA Library Prep 74-173	HIMC	23.4061	Control	No_mutation	Control
BIMD0009-01	BIMD0009	81	Female	batch_1	BIMD	RNA_Library_Prep_74-173	HIMC	35.1502	PD	No_mutation	iPD
BIMD0010-01	BIMD0010	68	Male	batch_2	BIMD	NA	HIMC	34.1827	PD	No_mutation	iPD
BIMD0012-01	BIMD0012	75	Male	batch_2	BIMD	BIMD RNA-Seq Box 1_RNA Library Prep 74-173	HIMC	32.1125	PD	No_mutation	LRRK2_PD
BIMD0020-01	BIMD0020	62	Male	batch_1	BIMD	BIMD RNA-Seq Box 1_RNA Library Prep 74-173	HIMC	26.8431	PD	No_mutation	iPD
BIMD0023-01	BIMD0023	72	Male	batch_1	BIMD	RNA_Library_Prep_74-173	HIMC	34.2948	PD	No_mutation	iPD
BIMD0028-01	BIMD0028	78	Female	batch_1	BIMD	BIMD RNA-Seq Box 1_RNA Library Prep 74-173	HIMC	26.4521	PD	No_mutation	iPD
BIMD0029-01	BIMD0029	71	Female	batch_2	BIMD	BIMD RNA-Seq Box 1_RNA Library Prep 74-173	HIMC	30.0646	PD	Mild	GBA_PD
BIMD0035-01	BIMD0035	71	Female	batch_1	BIMD	BIMD RNA-Seq Box 1_RNA Library Prep 74-173	HIMC	21.8931	Control	No_mutation	Control
BIMD0041-01	BIMD0041	60	Female	batch_1	BIMD	BIMD RNA-Seq Box 1_RNA Library Prep 74-173	HIMC	28.7952	Control	No_mutation	Control
BIMD0042-01	BIMD0042	72	Male	batch_1	BIMD	BIMD RNA-Seq Box 1_RNA Library Prep 74-173	HIMC	23.9277	PD	No_mutation	iPD
BIMD0044-01	BIMD0044	69	Male	batch_1	BIMD	BIMD RNA-Seq Box 1_RNA Library Prep 74-173	HIMC	26.265	PD	No_mutation	iPD
BIMD0047-01	BIMD0047	66	Female	batch_1	BIMD	BIMD RNA-Seq Box 1_RNA Library Prep 74-173	HIMC	28.5123	PD	No_mutation	iPD
BIMD0048-01	BIMD0048	68	Male	batch_1	BIMD	BIMD RNA-Seq Box 1_RNA Library Prep 74-173	HIMC	19.9669	PD	No_mutation	iPD
BIMD0049-01	BIMD0049	72	Female	batch_1	BIMD	BIMD RNA-Seq Box 1_RNA Library Prep 74-173	HIMC	33.3158	PD	No_mutation	LRRK2_PD
BIMD0054-01	BIMD0054	70	Male	batch_1	BIMD	BIMD RNA-Seq Box 1_RNA Library Prep 74-173	HIMC	15.442	PD	Mild	GBA_PD
BIMD0056-01	BIMD0056	72	Male	batch_1	BIMD	BIMD RNA-Seq Box 1_RNA Library Prep 74-173	HIMC	17.9449	PD	No_mutation	LRRK2_PD
BIMD0058-01	BIMD0058	68	Male	batch_1	BIMD	BIMD RNA-Seq Box 1_RNA Library Prep 74-173	HIMC	22.7179	PD	No_mutation	iPD
BIMD0059-01	BIMD0059	66	Female	batch_3	BIMD	BIMD RNA-Seq Box 1_RNA Library Prep 74-173	HIMC	16.4357	Control	No_mutation	Control
BIMD0060-01	BIMD0060	65	Female	batch_1	BIMD	BIMD RNA-Seq Box 1_RNA Library Prep 74-173	HIMC	18.2091	PD	No_mutation	LRRK2_PD
BIMD0063-01	BIMD0063	82	Male	batch_3	BIMD	BIMD RNA-Seq Box 1_RNA Library 174-	HIMC	29.8463	PD	Mild	GBA_PD
BIMD0066-01	BIMD0066	78	Male	batch_1	BIMD	BIMD_RNA-Seq_Box_1	HIMC	19.1843	PD	No_mutation	iPD
BIMD0067-01	BIMD0067	56	Male	batch_1	BIMD	BIMD_RNA-Seq_Box_1	HIMC	17.0293	PD	No_mutation	LRRK2_PD
BIMD0068-01	BIMD0068	65	Female	batch_1	BIMD	BIMD_RNA-Seq_Box_1	HIMC	16.3098	PD	No_mutation	LRRK2_PD
BIMD0070-01	BIMD0070	75	Male	batch_2	BIMD	BIMD_RNA-Seq_Box_1	HIMC	36.9916	PD	Mild	GBA_PD
BIMD0071-01	BIMD0071	75	Male	batch_1	BIMD	BIMD_RNA-Seq_Box_1	HIMC	45.8378	PD	Mild	GBA_PD
BIMD0073-01	BIMD0073	79	Male	batch_3	BIMD	BIMD_RNA-Seq_Box_1	HIMC	35.2568	PD	Mild	GBA_PD
BIMD0075-01	BIMD0075	74	Male	batch_1	BIMD	BIMD_RNA-Seq_Box_1	HIMC	19.3438	PD	No_mutation	LRRK2_PD
BIMD0079-01	BIMD0079	78	Male	batch_1	BIMD	NA	HIMC	22.341	PD	No_mutation	LRRK2_PD
BIMD0080-01	BIMD0080	66	Male	batch_2	BIMD	NA	NA	26.3387	PD	No_mutation	LRRK2_PD
BIMD0083-01	BIMD0083	75	Male	batch_1	BIMD	BIMD RNA-Seq Box 1	NA	30.8601	PD	No_mutation	LRRK2_PD
BIMD0088-01	BIMD0088	62	Female	batch_1	BIMD	NA	NA	37.5824	PD	Mild	GBA_PD
BIMD0089-01	BIMD0089	58	Female	batch_1	BIMD	BIMD_RNA-Seq_Box_1	NA	24.5777	PD	Mild	GBA_PD
BIMD0091-01	BIMD0091	64	Female	batch_1	BIMD	NA	NA	21.0394	PD	No_mutation	LRRK2_PD
BIMD0092-01	BIMD0092	67	Male	batch_1	BIMD	NA	NA	20.7023	PD	No_mutation	iPD
BIMD0097-01	BIMD0097	67	Female	batch_1	BIMD	BIMD_RNA-Seq_Box_1	NA	27.9563	PD	No_mutation	iPD
BIMD0098-01	BIMD0098	66	Male	batch_1	BIMD	BIMD_RNA-Seq_Box_1	NA	27.0611	PD	No_mutation	iPD
BIMD0099-01	BIMD0099	62	Male	batch_1	BIMD	NA	NA	12.7112	PD	No_mutation	iPD
BIMD0102-01	BIMD0102	58	Female	batch_1	BIMD	NA	NA	16.3346	PD	No_mutation	iPD
BIMD0106-01	BIMD0106	76	Male	batch_1	BIMD	BIMD_RNA-Seq_Box_1	NA	32.2664	PD	No_mutation	iPD
BIMD0107-01	BIMD0107	74	Female	batch_1	BIMD	NA	NA	18.1639	Control	No_mutation	Control
BIMD0108-01	BIMD0108	75	Male	batch_2	BIMD	NA	NA	48.0158	PD	No_mutation	LRRK2_PD
BIMD0109-01	BIMD0109	75	Female	batch_1	BIMD	NA	NA	26.146	Control	No_mutation	Control
BIMD0110-01	BIMD0110	76	Male	batch_1	BIMD	NA	NA	32.2664	PD	No_mutation	iPD
BIMD0111-01	BIMD0111	78	Male	batch_1	BIMD	BIMD_RNA-Seq_Box_1	NA	32.2664	PD	No_mutation	iPD
BIMD0114-01	BIMD0114	66	Male	batch_1	BIMD	BIMD_RNA-Seq_Box_1	NA	32.2664	PD	No_mutation	iPD
BIMD0116-01	BIMD0116	72	Female	batch_1	BIMD	NA	NA	26.5808	PD	No_mutation	iPD
BIMD0119-01	BIMD0119	74	Male	batch_2	BIMD	NA	NA	32.033	PD	No_mutation	LRRK2_PD
BIMD0120-01	BIMD0120	66	Female	batch_2	BIMD	NA	NA	26.6497	PD	Severe	NA
BIMD0122-01	BIMD0122	59	Female	batch_2	BIMD	NA	NA	38.6728	PD	No_mutation	LRRK2_PD
BIMD0125-01	BIMD0125	68	Male	batch_2	BIMD	NA	NA	36.78	PD	No_mutation	LRRK2_PD
BIMD0130-01	BIMD0130	70	Male	batch_2	BIMD	NA	NA	21.5031	PD	No_mutation	iPD
BIMD0131-01	BIMD0131	78	Female	batch_2	BIMD	NA	NA	25.2807	PD	No_mutation	LRRK2_PD
BIMD0133-01	BIMD0133	77	Female	batch_2	BIMD	NA	NA	30.6489	PD	No_mutation	LRRK2_PD
BIMD0139-01	BIMD0139	72	Female	batch_2	BIMD	NA	NA	44.2276	PD	No_mutation	iPD
BIMD0143-01	BIMD0143	63	Male	batch_2	BIMD	NA	NA	39.1302	PD	No_mutation	iPD
BIMD0145-01	BIMD0145	74	Male	batch_2	BIMD	NA	NA	25.5562	PD	No_mutation	iPD
BIMD0148-01	BIMD0148	73	Female	batch_2	BIMD	NA	NA	33.244	PD	No_mutation	NA
BIMD0151-01	BIMD0151	71	Male	batch_2	BIMD	NA	NA	39.7141	PD	Mild	GBA_PD
BIMD0152-01	BIMD0152	58	Female	batch_2	BIMD	NA	NA	57.7419	PD	Severe	NA
BIMD0156-01	BIMD0156	72	Male	batch_2	BIMD	NA	NA	46.4643	PD	Mild	GBA_PD
BIMD0157-01	BIMD0157	36	Male	batch_2	BIMD	NA	NA	19.4674	PD	Mild	GBA_PD
BIMD0158-01	BIMD0158	62	Male	batch_2	BIMD	NA	NA	34.6831	PD	No_mutation	iPD
BIMD0161-01	BIMD0161	68	Male	batch_2	BIMD	NA	NA	39.2283	PD	No_mutation	iPD
BIMD0162-01	BIMD0162	56	Male	batch_2	BIMD	NA	NA	36.938	PD	No_mutation	LRRK2_PD
BIMD0163-01	BIMD0163	84	Male	batch_2	BIMD	NA	NA	46.8833	PD	No_mutation	iPD
BIMD0164-01	BIMD0164	60	Male	batch_2	BIMD	NA	Maojuan	34.3843	PD	No_mutation	iPD
BIMD0166-01	BIMD0166	60	Male	batch_2	BIMD	NA	NA	33.8898	PD	No_mutation	LRRK2_PD
BIMD0167-01	BIMD0167	74	Male	batch_2	BIMD	NA	NA	37.5447	PD	No_mutation	iPD
BIMD0168-01	BIMD0168	68	Male	batch_2	BIMD	NA	NA	42.5724	PD	Mild	GBA_PD
BIMD0169-01	BIMD0169	64	Male	batch_2	BIMD	NA	NA	36.8267	PD	No_mutation	iPD
BIMD0171-01	BIMD0171	47	Male	batch_2	BIMD	NA	NA	39.1099	PD	No_mutation	iPD
BIMD0172-01	BIMD0172	66	Female	batch_2	BIMD	NA	NA	45.6104	PD	No_mutation	iPD
BIMD0173-01	BIMD0173	79	Male	batch_2	BIMD	NA	NA	45.3094	PD	No_mutation	iPD
BIMD0174-01	BIMD0174	72	Male	batch_2	BIMD	NA	NA	39.8668	PD	No_mutation	iPD
BIMD0176-01	BIMD0176	80	Male	batch_2	BIMD	NA	NA	34.0765	PD	No_mutation	LRRK2_PD
BIMD0177-01	BIMD0177	74	Female	batch_2	BIMD	NA	NA	43.6822	PD	No_mutation	iPD
BIMD0178-01	BIMD0178	74	Male	batch_2	BIMD	NA	NA	37.9386	Control	No_mutation	Control
BIMD0179-01	BIMD0179	72	Female	batch_2	BIMD	NA	NA	42.3846	PD	No_mutation	iPD
BIMD0180-01	BIMD0180	68	Male	batch_2	BIMD	NA	NA	35.2633	Control	No_mutation	Control
BIMD0183-01	BIMD0183	66	Male	batch_2	BIMD	NA	NA	31.8484	PD	No_mutation	LRRK2_PD
BIMD0186-01	BIMD0186	68	Male	batch_2	BIMD	NA	NA	31.0285	PD	No_mutation	iPD
BIMD0187-01	BIMD0187	64	Male	batch_2	BIMD	NA	NA	34.2021	Control	No_mutation	Control
BIMD0189-01	BIMD0189	81	Female	batch_2	BIMD	NA	Maojuan	39.8583	PD	No_mutation	iPD
BIMD0192-01	BIMD0192	72	Female	batch_2	BIMD	NA	Maojuan	38.9253	Control	No_mutation	Control
BIMD0194-01	BIMD0194	85	Female	batch_3	BIMD	BIMD_RNA_Box_2	Maojuan	28.3699	Control	No_mutation	Control
BIMD0195-01	BIMD0195	71	Male	batch_2	BIMD	NA	Maojuan	29.035	PD	No_mutation	iPD
BIMD0198-01	BIMD0198	71	Male	batch_3	BIMD	BIMD_RNA_Box_1	Maojuan	32.5703	PD	Mild	GBA_PD
BIMD0201-01	BIMD0201	72	Male	batch_2	BIMD	NA	Maojuan	47.621	Control	No_mutation	Control
BIMD0202-01	BIMD0202	86	Female	batch_2	BIMD	NA	Maojuan	36.7469	PD	No_mutation	LRRK2_PD
BIMD0204-01	BIMD0204	65	Male	batch_2	BIMD	NA	Maojuan	46.0143	PD	No_mutation	iPD
BIMD0205-01	BIMD0205	73	Male	batch_2	BIMD	NA	Amanda	27.6118	PD	No_mutation	iPD
BIMD0206-01	BIMD0206	68	Male	batch_2	BIMD	NA	Maojuan	38.0724	PD	Risk_variant	NA
BIMD0208-01	BIMD0208	66	Female	batch_2	BIMD	NA	Maojuan	51.3349	PD	Mild	GBA_PD
BIMD0209-01	BIMD0209	67	Male	batch_2	BIMD	NA	Maojuan	33.6448	Control	No_mutation	Control
BIMD0210-01	BIMD0210	67	Male	batch_2	BIMD	NA	Amanda	43.7203	PD	No_mutation	iPD
BIMD0211-01	BIMD0211	73	Female	batch_3	BIMD	BIMD_RNA_Box_1	Maojuan	28.5166	PD	No_mutation	iPD
BIMD0213-01	BIMD0213	79	Male	batch_2	BIMD	NA	Maojuan	27.4572	PD	No_mutation	LRRK2_PD
BIMD0215-01	BIMD0215	68	Female	batch_2	BIMD	NA	Maojuan	39.4195	PD	Mild	GBA_PD
BIMD0216-01	BIMD0216	64	Male	batch_2	BIMD	NA	Maojuan	49.2841	PD	No_mutation	iPD
BIMD0217-01	BIMD0217	78	Male	batch_2	BIMD	NA	Maojuan	40.2794	PD	No_mutation	iPD
BIMD0219-01	BIMD0219	77	Male	batch_2	BIMD	NA	Amanda	24.3415	PD	No_mutation	iPD
BIMD0220-01	BIMD0220	55	Female	batch_2	BIMD	NA	Amanda	37.1452	PD	Mild	GBA_PD
BIMD0221-01	BIMD0221	74	Male	batch_3	BIMD	BIMD_RNA_Box_1	Maojuan	37.846	PD	No_mutation	iPD
BIMD0222-01	BIMD0222	50	Male	batch_2	BIMD	NA	Maojuan	47.3806	PD	Mild	GBA_PD
BIMD0223-01	BIMD0223	73	Male	batch_3	BIMD	BIMD_RNA_Box_1	Maojuan	20.3983	PD	No_mutation	LRRK2_PD
BIMD0224-01	BIMD0224	82	Female	batch_3	BIMD	BIMD_RNA_Box_2	NA	26.6569	PD	No_mutation	LRRK2_PD
BIMD0228-01	BIMD0228	59	Female	batch_3	BIMD	BIMD_RNA_Box_1	Maojuan	36.2599	PD	No_mutation	LRRK2_PD
BIMD0229-01	BIMD0229	62	Male	batch_2	BIMD	NA	Maojuan	26.1247	PD	Mild	GBA_PD
BIMD0230-01	BIMD0230	74	Male	batch_3	BIMD	BIMD_RNA_Box_1	Maojuan	36.2787	PD	Mild	GBA_PD
BIMD0234-01	BIMD0234	49	Female	batch_3	BIMD	BIMD_RNA_Box_1	Maojuan	33.4626	PD	Mild	GBA_PD
BIMD0235-01	BIMD0235	67	Male	batch_3	BIMD	BIMD_RNA_Box_1	Maojuan	26.6573	PD	Mild	GBA_PD
BIMD0236-01	BIMD0236	81	Male	batch_3	BIMD	BIMD_RNA_Box_1	Maojuan	26.0314	PD	No_mutation	LRRK2_PD
BIMD0237-01	BIMD0237	75	Male	batch_3	BIMD	BIMD_RNA_Box_1	Amanda	35.6902	PD	No_mutation	iPD
BIMD0238-01	BIMD0238	72	Female	batch_3	BIMD	BIMD_RNA_Box_1	Maojuan	31.989	PD	No_mutation	iPD
BIMD0240-01	BIMD0240	50	Female	batch_3	BIMD	BIMD_RNA_Box_1	Maojuan	32.5156	PD	No_mutation	iPD
BIMD0241-01	BIMD0241	51	Male	batch_3	BIMD	BIMD_RNA_Box_1	Maojuan	28.6082	PD	No_mutation	iPD
BIMD0244-01	BIMD0244	53	Male	batch_3	BIMD	BIMD_RNA_Box_1	Amanda	38.016	PD	No_mutation	LRRK2_PD
BIMD0245-01	BIMD0245	80	Male	batch_3	BIMD	BIMD_RNA_Box_1	Amanda	36.2769	Control	No_mutation	Control
BIMD0246-01	BIMD0246	67	Male	batch_3	BIMD	BIMD_RNA_Box_1	Amanda	43.7011	PD	Risk_variant	NA
BIMD0247-01	BIMD0247	56	Female	batch_3	BIMD	BIMD_RNA_Box_1	Amanda	21.0088	Control	No_mutation	Control
BIMD0248-01	BIMD0248	67	Female	batch_3	BIMD	BIMD_RNA_Box_1	Maojuan	31.5969	PD	Severe	NA
BIMD0249-01	BIMD0249	81	Male	batch_3	BIMD	BIMD_RNA_Box_1	Maojuan	26.2552	PD	Mild	GBA_PD
BIMD0250-01	BIMD0250	91	Female	batch_3	BIMD	BIMD_RNA_Box_1	Amanda	30.6923	PD	No_mutation	LRRK2_PD
BIMD0251-01	BIMD0251	69	Female	batch_3	BIMD	BIMD_RNA_Box_1	Maojuan	32.308	PD	Mild	GBA_PD
BIMD0252-01	BIMD0252	82	Male	batch_3	BIMD	BIMD_RNA_Box_1	Maojuan	33.9046	PD	No_mutation	LRRK2_PD
BIMD0253-01	BIMD0253	81	Male	batch_3	BIMD	BIMD_RNA_Box_1	Amanda	39.5578	PD	No_mutation	LRRK2_PD
BIMD0254-01	BIMD0254	72	Male	batch_3	BIMD	BIMD_RNA_Box_1	Amanda	43.9897	PD	Mild	GBA_PD
BIMD0255-01	BIMD0255	74	Male	batch_3	BIMD	BIMD_RNA_Box_1	Maojuan	35.9863	PD	No_mutation	LRRK2_PD
BIMD0256-01	BIMD0256	70	Male	batch_3	BIMD	BIMD_RNA_Box_1	Maojuan	29.4214	PD	No_mutation	iPD
BIMD0257-01	BIMD0257	74	Female	batch_3	BIMD	BIMD_RNA_Box_1	Amanda	39.8252	Control	No_mutation	Control
BIMD0261-01	BIMD0261	66	Male	batch_3	BIMD	BIMD_RNA_Box_1	Amanda	44.1704	PD	No_mutation	iPD
BIMD0262-01	BIMD0262	81	Female	batch_3	BIMD	BIMD_RNA_Box_1	Amanda	33.6775	PD	No_mutation	iPD
BIMD0263-01	BIMD0263	69	Male	batch_3	BIMD	BIMD_RNA_Box_1	Amanda	28.5729	PD	No_mutation	iPD
BIMD0265-01	BIMD0265	55	Female	batch_3	BIMD	BIMD_RNA_Box_1	Maojuan	29.2046	PD	No_mutation	iPD
BIMD0266-01	BIMD0266	75	Female	batch_3	BIMD	BIMD_RNA_Box_1	Maojuan	26.9429	PD	No_mutation	LRRK2_PD
BIMD0267-01	BIMD0267	77	Male	batch_3	BIMD	BIMD_RNA_Box_1	Maojuan	27.2046	PD	No_mutation	LRRK2_PD
BIMD0270-01	BIMD0270	58	Male	batch_3	BIMD	BIMD_RNA_Box_1	Maojuan	25.2739	PD	Mild	GBA_PD
BIMD0272-01	BIMD0272	78	Female	batch_3	BIMD	BIMD_RNA_Box_1	Maojuan	30.56	Control	No_mutation	Control
BIMD0273-01	BIMD0273	58	Female	batch_3	BIMD	BIMD_RNA_Box_2	Maojuan	27.3416	PD	Mild	GBA_PD
BIMD0274-01	BIMD0274	51	Male	batch_3	BIMD	BIMD_RNA_Box_1	Maojuan	25.5654	PD	Mild	GBA_PD
BIMD0275-01	BIMD0275	61	Female	batch_3	BIMD	BIMD_RNA_Box_1	Maojuan	25.4828	PD	No_mutation	iPD
BIMD0276-01	BIMD0276	79	Male	batch_3	BIMD	BIMD_RNA_Box_1	Maojuan	38.5009	PD	No_mutation	LRRK2_PD
BIMD0278-01	BIMD0278	72	Female	batch_3	BIMD	BIMD_RNA_Box_1	Maojuan	39.0113	PD	No_mutation	iPD
BIMD0279-01	BIMD0279	69	Male	batch_3	BIMD	BIMD_RNA_Box_1	Maojuan	28.1383	PD	No_mutation	iPD
BIMD0280-01	BIMD0280	75	Male	batch_3	BIMD	BIMD_RNA_Box_1	Maojuan	34.3713	PD	No_mutation	LRRK2_PD
BIMD0281-01	BIMD0281	84	Male	batch_3	BIMD	BIMD_RNA_Box_1	Maojuan	28.5755	PD	No_mutation	iPD
BIMD0282-01	BIMD0282	61	Male	batch_3	BIMD	BIMD_RNA_Box_1	Maojuan	36.9848	PD	Mild	GBA_PD
BIMD0283-01	BIMD0283	66	Male	batch_3	BIMD	BIMD_RNA_Box_1	Maojuan	29.5115	PD	No_mutation	iPD
BIMD0285-01	BIMD0285	77	Female	batch_3	BIMD	BIMD_RNA_Box_1	Maojuan	33.4981	PD	No_mutation	iPD
BIMD0290-01	BIMD0290	55	Male	batch_3	BIMD	BIMD_RNA_Box_1	Amanda	28.9188	PD	No_mutation	iPD
BIMD0291-01	BIMD0291	78	Male	batch_3	BIMD	BIMD_RNA_Box_1	Maojuan	32.306	PD	No_mutation	iPD
BIMD0295-01	BIMD0295	65	Male	batch_3	BIMD	BIMD_RNA_Box_1	Amanda	35.2801	PD	No_mutation	iPD
BIMD0297-01	BIMD0297	67	Male	batch_3	BIMD	BIMD_RNA_Box_1	Maojuan	29.0191	PD	No_mutation	iPD
BIMD0298-01	BIMD0298	77	Female	batch_3	BIMD	BIMD_RNA_Box_1	Maojuan	20.5147	PD	No_mutation	LRRK2_PD
BIMD0300-01	BIMD0300	73	Female	batch_3	BIMD	BIMD_RNA_Box_1	Maojuan	27.923	PD	No_mutation	iPD
BIMD0301-01	BIMD0301	66	Male	batch_3	BIMD	BIMD_RNA_Box_1	Maojuan	29.5479	PD	No_mutation	iPD
BIMD0305-01	BIMD0305	70	Female	batch_3	BIMD	BIMD_RNA_Box_1	Maojuan	29.1545	PD	No_mutation	LRRK2_PD
BIMD0306-01	BIMD0306	66	Male	batch_3	BIMD	BIMD_RNA_Box_1	Maojuan	43.4323	PD	Mild	GBA_PD
BIMD0307-01	BIMD0307	73	Female	batch_3	BIMD	BIMD_RNA_Box_1	Maojuan	26.9249	PD	No_mutation	iPD
BIMD0308-01	BIMD0308	82	Female	batch_3	BIMD	BIMD_RNA_Box_1	Maojuan	25.9971	PD	No_mutation	iPD
BIMD0309-01	BIMD0309	83	Male	batch_3	BIMD	BIMD_RNA_Box_1	Maojuan	27.4923	Control	No_mutation	Control
BIMD0310-01	BIMD0310	65	Male	batch_3	BIMD	BIMD_RNA_Box_1	Amanda	31.6777	PD	No_mutation	iPD
BIMD0313-01	BIMD0313	51	Male	batch_3	BIMD	BIMD_RNA_Box_1	Maojuan_Amanda	37.2281	PD	No_mutation	LRRK2_PD
BIMD0314-01	BIMD0314	72	Male	batch_3	BIMD	BIMD_RNA_Box_2	Maojuan	29.3574	PD	No_mutation	iPD
BIMD0315-01	BIMD0315	65	Male	batch_3	BIMD	BIMD_RNA_Box_2	Maojuan	29.5006	PD	Mild	GBA_PD
BIMD0316-01	BIMD0316	72	Female	batch_3	BIMD	BIMD_RNA_Box_2	Maojuan	41.8838	PD	No_mutation	LRRK2_PD
BIMD0317-01	BIMD0317	64	Male	batch_3	BIMD	BIMD_RNA_Box_2	Maojuan	35.9602	PD	No_mutation	iPD
BIMD0320-01	BIMD0320	79	Female	batch_3	BIMD	BIMD_RNA_Box_2	Maojuan	36.5278	PD	No_mutation	iPD
BIMD0321-01	BIMD0321	76	Male	batch_3	BIMD	BIMD_RNA_Box_2	Maojuan	37.6737	PD	No_mutation	iPD
BIMD0323-01	BIMD0323	74	Male	batch_3	BIMD	BIMD_RNA_Box_2	Maojuan_Amanda	28.9141	PD	No_mutation	LRRK2_PD
BIMD0324-01	BIMD0324	82	Male	batch_3	BIMD	BIMD_RNA_Box_2	Maojuan	26.6401	PD	No_mutation	iPD
BIMD0327-01	BIMD0327	67	Male	batch_3	BIMD	BIMD_RNA_Box_2	Maojuan	31.7589	PD	No_mutation	iPD
BIMD0328-01	BIMD0328	70	Male	batch_3	BIMD	BIMD_RNA_Box_2	Maojuan	32.7807	PD	No_mutation	iPD
BIMD0329-01	BIMD0329	70	Male	batch_3	BIMD	BIMD_RNA_Box_2	Amanda	30.9795	PD	No_mutation	iPD
BIMD0330-01	BIMD0330	85	Female	batch_3	BIMD	BIMD_RNA_Box_2	Maojuan	49.9511	PD	No_mutation	LRRK2_PD
BIMD0332-01	BIMD0332	61	Female	batch_3	BIMD	BIMD_RNA_Box_2	Maojuan	32.992	PD	Severe	NA
BIMD0334-01	BIMD0334	84	Male	batch_3	BIMD	BIMD_RNA_Box_2	Maojuan	40.9271	Control	No_mutation	Control
BIMD0335-01	BIMD0335	70	Male	batch_3	BIMD	BIMD_RNA_Box_2	Maojuan	28.0105	PD	No_mutation	iPD
BIMD0337-01	BIMD0337	75	Female	batch_3	BIMD	BIMD_RNA_Box_2	Maojuan	31.1637	PD	No_mutation	iPD
BIMD0340-01	BIMD0340	78	Female	batch_3	BIMD	BIMD_RNA_Box_2	Maojuan	30.0892	PD	No_mutation	iPD
BIMD0341-01	BIMD0341	63	Male	batch_3	BIMD	BIMD_RNA_Box_2	Maojuan	29.7219	PD	No_mutation	LRRK2_PD
BIMD0342-01	BIMD0342	69	Male	batch_3	BIMD	BIMD_RNA_Box_2	Maojuan	34.0057	PD	No_mutation	LRRK2_PD
BIMD0343-01	BIMD0343	57	Male	batch_3	BIMD	BIMD_RNA_Box_2	Maojuan	29.9222	PD	No_mutation	LRRK2_PD
BIMD0346-01	BIMD0346	63	Male	batch_3	BIMD	BIMD_RNA_Box_2	Maojuan	29.1988	PD	No_mutation	iPD
BIMD0347-01	BIMD0347	75	Male	batch_3	BIMD	BIMD_RNA_Box_2	Maojuan	39.688	PD	No_mutation	iPD
BIMD0349-01	BIMD0349	63	Male	batch_3	BIMD	BIMD_RNA_Box_2	Maojuan	31.8724	PD	No_mutation	iPD
BIMD0350-01	BIMD0350	79	Male	batch_3	BIMD	BIMD_RNA_Box_2	Maojuan	29.9393	PD	No_mutation	iPD
BIMD0351-01	BIMD0351	70	Male	batch_3	BIMD	BIMD_RNA_Box_2	Amanda	48.7125	PD	Risk_variant	NA
BIMD0356-01	BIMD0356	54	Male	batch_3	BIMD	BIMD_RNA_Box_2	Maojuan	29.7231	PD	Mild	GBA_PD
BIMD0362-01	BIMD0362	62	Female	batch_3	BIMD	BIMD_RNA_Box_2	Maojuan	43.4322	PD	Mild	GBA_PD
BIMD0364-01	BIMD0364	87	Male	batch_3	BIMD	BIMD_RNA_Box_2	Maojuan	31.2915	PD	No_mutation	iPD
BIMD0365-01	BIMD0365	66	Male	batch_3	BIMD	BIMD_RNA_Box_2	Maojuan	47.0264	PD	No_mutation	iPD
BIMD0366-01	BIMD0366	57	Female	batch_3	BIMD	BIMD_RNA_Box_2	Maojuan	35.8712	PD	No_mutation	iPD
BIMD0367-01	BIMD0367	69	Male	batch_3	BIMD	BIMD_RNA_Box_2	Maojuan	38.6417	PD	No_mutation	iPD
BIMD0370-01	BIMD0370	64	Female	batch_3	BIMD	BIMD_RNA_Box_2	Maojuan	25.8672	PD	No_mutation	LRRK2_PD
BIMD0372-01	BIMD0372	78	Male	batch_3	BIMD	BIMD_RNA_Box_2	Maojuan	35.1447	PD	No_mutation	iPD
BIMD0373-01	BIMD0373	66	Female	batch_3	BIMD	BIMD_RNA_Box_2	Maojuan	49.576	PD	No_mutation	iPD
BIMD0379-01	BIMD0379	71	Male	batch_3	BIMD	BIMD_RNA_Box_2	Amanda	30.3484	PD	No_mutation	iPD
BIMD0382-01	BIMD0382	67	Female	batch_3	BIMD	BIMD_RNA_Box_2	Maojuan	38.255	PD	Mild	GBA_PD
BIMD0383-01	BIMD0383	84	Male	batch_3	BIMD	BIMD_RNA_Box_2	Amanda	33.5498	PD	No_mutation	iPD
BIMD0384-01	BIMD0384	64	Female	batch_3	BIMD	BIMD_RNA_Box_2	Maojuan	32.3556	Control	No_mutation	Control
NYUMD0003-01	NYUMD0003	74	Male	batch_1	NYUMD	NYUMD_RNA_Seq_Box_1	HIMC	21.0962	PD	Biallelic	iPD
BIMD0212-01	BIMD0212	65	Male	batch_2	BIMD	NA	Maojuan	46.7549	PD	Biallelic	GBA_PD
BIMD0077-01	BIMD0077	51	Male	batch_1	BIMD	NA	HIMC	32.9412	PD	Biallelic	GBA_PD
BIMD0302-01	BIMD0302	66	Female	batch_3	BIMD	BIMD_RNA_Box_1	Maojuan	24.611	PD	Biallelic	GBA_PD

## Sheet: Table_2 GBAviPD_DEGs
ensembl	logFC	AveExpr	t	P.Value	adj.P.Val	B	gene_name	gene_type	gene_reg
ENSG00000198168.9	0.512371	1.85888	5.96832	7.7134e-09	6.75296e-05	9.12095	SVIP	protein_coding	up
ENSG00000116852.14	0.26614	5.42443	5.91579	1.02325e-08	6.75296e-05	9.59742	KIF21B	protein_coding	up
ENSG00000106415.13	0.347865	2.30207	5.8171	1.73156e-08	7.61829e-05	8.60717	GLCCI1	protein_coding	up
ENSG00000160789.20	0.959096	4.14816	5.75036	2.4625e-08	8.12563e-05	8.71164	LMNA	protein_coding	up
ENSG00000155749.12	0.539867	0.380307	5.67587	3.63539e-08	9.5967e-05	6.50833	ALS2CR12	protein_coding	up
ENSG00000038427.16	-0.308942	12.3794	-5.46077	1.09643e-07	0.000210153	7.34005	VCAN	protein_coding	down
ENSG00000150637.9	0.818096	2.96111	5.44603	1.18121e-07	0.000210153	7.13852	CD226	protein_coding	up
ENSG00000197746.14	-0.189879	11.6939	-5.41636	1.37172e-07	0.000210153	7.14764	PSAP	protein_coding	down
ENSG00000084234.17	-0.267845	9.98019	-5.40766	1.43297e-07	0.000210153	7.12633	APLP2	protein_coding	down
ENSG00000160781.17	0.489653	1.51882	5.3519	1.89414e-07	0.000250008	6.1705	PAQR6	protein_coding	up
ENSG00000132205.11	-0.219419	8.18158	-5.293	2.53738e-07	0.000281707	6.59951	EMILIN2	protein_coding	down
ENSG00000106603.18	0.211311	4.93257	5.29111	2.56117e-07	0.000281707	6.589	COA1	protein_coding	up
ENSG00000118922.17	0.434783	4.66219	5.21437	3.73459e-07	0.000371186	6.2358	KLF12	protein_coding	up
ENSG00000027075.15	0.386461	3.82666	5.20356	3.93712e-07	0.000371186	6.1545	PRKCH	protein_coding	up
ENSG00000123384.13	-0.355444	10.2004	-5.1841	4.32871e-07	0.000374154	6.0994	LRP1	protein_coding	down
ENSG00000108829.10	-0.172807	6.51201	-5.17451	4.53555e-07	0.000374154	6.05818	LRRC59	protein_coding	down
ENSG00000137198.9	0.740198	1.58636	5.16064	4.85149e-07	0.000376676	5.39792	GMPR	protein_coding	up
ENSG00000196576.15	-0.26638	8.77494	-5.13554	5.47837e-07	0.000401717	5.88292	PLXNB2	protein_coding	down
ENSG00000163472.19	0.308181	2.52711	5.07418	7.35921e-07	0.000511233	5.39042	TMEM79	protein_coding	up
ENSG00000171843.16	0.347293	2.62695	5.03538	8.85731e-07	0.00055796	5.27907	MLLT3	protein_coding	up
ENSG00000124635.8	0.532383	0.609565	5.03287	8.96359e-07	0.00055796	4.40222	HIST1H2BJ	protein_coding	up
ENSG00000164543.7	0.247371	4.42055	5.02095	9.48631e-07	0.00055796	5.37106	STK17A	protein_coding	up
ENSG00000114735.9	0.171526	4.11213	5.00883	1.00482e-06	0.00055796	5.31138	HEMK1	protein_coding	up
ENSG00000082146.13	0.525156	4.55111	4.99692	1.06314e-06	0.00055796	5.26391	STRADB	protein_coding	up
ENSG00000068724.16	-0.186039	7.36547	-4.98991	1.09902e-06	0.00055796	5.23422	TTC7A	protein_coding	down
ENSG00000104774.13	-0.196061	8.47082	-4.98989	1.0991e-06	0.00055796	5.23486	MAN2B1	protein_coding	down
ENSG00000106682.14	-0.120249	7.93093	-4.97709	1.16762e-06	0.000570795	5.17776	EIF4H	protein_coding	down
ENSG00000073849.15	0.229018	5.98915	4.95067	1.32234e-06	0.000612526	5.06194	ST6GAL1	protein_coding	up
ENSG00000084652.16	-0.12174	5.8301	-4.94403	1.36424e-06	0.000612526	5.03398	TXLNA	protein_coding	down
ENSG00000120708.17	-0.277782	8.94508	-4.93961	1.39284e-06	0.000612526	5.01676	TGFBI	protein_coding	down
ENSG00000164506.14	0.234385	5.49928	4.93271	1.43862e-06	0.000612526	4.9845	STXBP5	protein_coding	up
ENSG00000129226.14	-0.205226	9.4472	-4.9086	1.61041e-06	0.000664242	4.88284	CD68	protein_coding	down
ENSG00000148672.9	-0.104501	7.26616	-4.86909	1.93557e-06	0.000758792	4.70895	GLUD1	protein_coding	down
ENSG00000162777.17	0.255706	4.74602	4.86146	2.00528e-06	0.000758792	4.68177	DENND2D	protein_coding	up
ENSG00000272419.6	0.270402	4.6061	4.86073	2.0121e-06	0.000758792	4.67874	LINC01145	transcribed_unprocessed_pseudogene	up
ENSG00000165168.7	-0.189525	10.8046	-4.84507	2.16333e-06	0.000793162	4.6118	CYBB	protein_coding	down
ENSG00000090238.11	0.262852	6.36593	4.82118	2.41557e-06	0.000851424	4.50317	YPEL3	protein_coding	up
ENSG00000088179.9	0.265981	4.29288	4.81556	2.4788e-06	0.000851424	4.48584	PTPN4	protein_coding	up
ENSG00000067208.14	-0.194916	5.98246	-4.81235	2.51576e-06	0.000851424	4.46885	EVI5	protein_coding	down
ENSG00000121064.12	-0.216293	7.18171	-4.79312	2.74798e-06	0.000906765	4.38512	SCPEP1	protein_coding	down
ENSG00000125257.15	0.337505	3.18766	4.78358	2.87073e-06	0.000924165	4.30255	ABCC4	protein_coding	up
ENSG00000034713.8	0.181265	5.41717	4.77812	2.94336e-06	0.000924985	4.3204	GABARAPL2	protein_coding	up
ENSG00000104164.10	-0.128989	6.36246	-4.77165	3.03181e-06	0.000930626	4.29359	BLOC1S6	protein_coding	down
ENSG00000125354.23	0.166057	6.04415	4.75147	3.32418e-06	0.000997178	4.20287	2025-09-06	protein_coding	up
ENSG00000123739.11	0.325422	2.77737	4.73622	3.56286e-06	0.00104503	4.06848	PLA2G12A	protein_coding	up
ENSG00000166340.17	-0.205826	8.92726	-4.72918	3.6787e-06	0.00105555	4.11629	TPP1	protein_coding	down
ENSG00000154814.14	0.287405	3.7558	4.71913	3.85021e-06	0.00106418	4.07486	OXNAD1	protein_coding	up
ENSG00000114423.21	0.229797	4.0567	4.71644	3.8974e-06	0.00106418	4.06927	CBLB	protein_coding	up
ENSG00000082512.15	0.36148	2.53023	4.71055	4.00261e-06	0.00106418	3.91312	TRAF5	protein_coding	up
ENSG00000077157.22	0.245746	5.42928	4.70898	4.03127e-06	0.00106418	4.03079	PPP1R12B	protein_coding	up
ENSG00000179051.14	-0.184993	6.94204	-4.69609	4.273e-06	0.00110587	3.97254	RCC2	protein_coding	down
ENSG00000159399.9	-0.24646	6.9411	-4.68194	4.55446e-06	0.00111081	3.91201	HK2	protein_coding	down
ENSG00000120594.17	-0.173307	8.85868	-4.67622	4.6732e-06	0.00111081	3.89523	PLXDC2	protein_coding	down
ENSG00000196187.12	0.163561	5.48028	4.67494	4.70029e-06	0.00111081	3.89062	TMEM63A	protein_coding	up
ENSG00000127022.15	-0.155909	9.23077	-4.67413	4.71731e-06	0.00111081	3.88935	CANX	protein_coding	down
ENSG00000107331.17	0.234158	4.39881	4.67401	4.71987e-06	0.00111081	3.89538	ABCA2	protein_coding	up
ENSG00000100280.16	-0.159002	7.02665	-4.67041	4.79705e-06	0.00111081	3.86435	AP1B1	protein_coding	down
ENSG00000069493.15	0.306499	3.89458	4.66093	5.00558e-06	0.00113911	3.83883	CLEC2D	protein_coding	up
ENSG00000157978.11	0.281281	4.03144	4.65002	5.25649e-06	0.00116649	3.79536	LDLRAP1	protein_coding	up
ENSG00000178695.5	-0.198764	9.50366	-4.64807	5.30262e-06	0.00116649	3.78287	KCTD12	protein_coding	down
ENSG00000013306.16	0.499817	5.56169	4.63942	5.5118e-06	0.00119082	3.74731	SLC25A39	protein_coding	up
ENSG00000271503.6	0.916507	3.32197	4.63613	5.59367e-06	0.00119082	3.70692	CCL5	protein_coding	up
ENSG00000277147.6	0.340722	3.38596	4.60831	6.3322e-06	0.00131271	3.61234	LINC00869	transcribed_unprocessed_pseudogene	up
ENSG00000198589.12	0.16988	5.73673	4.60366	6.46452e-06	0.00131271	3.58867	LRBA	protein_coding	up
ENSG00000173638.19	0.198747	5.50862	4.60366	6.46459e-06	0.00131271	3.59333	SLC19A1	protein_coding	up
ENSG00000058262.10	-0.136704	7.55373	-4.57883	7.21724e-06	0.00144334	3.48557	SEC61A1	protein_coding	down
ENSG00000198951.11	-0.145784	7.54747	-4.57065	7.48312e-06	0.00147027	3.45533	NAGA	protein_coding	down
ENSG00000180573.9	0.249028	6.41668	4.56519	7.66595e-06	0.00147027	3.42994	HIST1H2AC	protein_coding	up
ENSG00000146859.6	0.225674	4.71454	4.5646	7.68606e-06	0.00147027	3.44503	TMEM140	protein_coding	up
ENSG00000161960.15	-0.142113	8.90876	-4.54876	8.24208e-06	0.0015541	3.37232	EIF4A1	protein_coding	down
ENSG00000197629.5	-0.172613	10.4718	-4.53841	8.62621e-06	0.00160362	3.33971	MPEG1	protein_coding	down
ENSG00000170956.17	0.523847	2.72873	4.52647	9.09047e-06	0.00160566	3.21566	CEACAM3	protein_coding	up
ENSG00000172053.18	-0.152297	7.05203	-4.5252	9.14102e-06	0.00160566	3.26772	QARS	protein_coding	down
ENSG00000213658.11	0.379821	2.20024	4.52474	9.15959e-06	0.00160566	3.12228	LAT	protein_coding	up
ENSG00000205302.7	-0.128976	6.62846	-4.52152	9.28996e-06	0.00160566	3.25848	SNX2	protein_coding	down
ENSG00000163736.4	0.956141	4.52807	4.50875	9.82406e-06	0.00160566	3.2238	PPBP	protein_coding	up
ENSG00000169180.11	0.2007	7.48686	4.50758	9.87442e-06	0.00160566	3.19334	XPO6	protein_coding	up
ENSG00000115935.17	0.142481	8.4763	4.5069	9.90396e-06	0.00160566	3.19797	WIPF1	protein_coding	up
ENSG00000116497.18	0.130777	4.67937	4.50442	1.00117e-05	0.00160566	3.20185	S100PBP	protein_coding	up
ENSG00000172183.15	0.458234	3.47055	4.50209	1.01143e-05	0.00160566	3.18891	ISG20	protein_coding	up
ENSG00000284691.1	0.406909	0.905147	4.50097	1.0164e-05	0.00160566	2.58991	AC073111.5	protein_coding	up
ENSG00000116824.5	0.650496	1.13165	4.50008	1.02036e-05	0.00160566	2.71204	CD2	protein_coding	up
ENSG00000187699.10	0.691665	2.5644	4.49864	1.02678e-05	0.00160566	3.10792	C2orf88	protein_coding	up
ENSG00000128011.4	0.269834	2.46519	4.4951	1.04279e-05	0.00160566	3.0552	LRFN1	protein_coding	up
ENSG00000149218.5	0.326124	3.47894	4.49274	1.05358e-05	0.00160566	3.15465	ENDOD1	protein_coding	up
ENSG00000173868.11	0.502217	3.93843	4.49133	1.06006e-05	0.00160566	3.15252	PHOSPHO1	protein_coding	up
ENSG00000172349.17	0.162739	7.42984	4.48839	1.07375e-05	0.00160566	3.11598	IL16	protein_coding	up
ENSG00000142192.21	-0.210493	7.0689	-4.48547	1.08749e-05	0.00160566	3.11287	APP	protein_coding	down
ENSG00000198721.12	0.174561	3.27495	4.48345	1.09711e-05	0.00160566	3.10784	ECI2	protein_coding	up
ENSG00000136868.11	-0.181448	5.95521	-4.48057	1.11094e-05	0.00160566	3.09455	SLC31A1	protein_coding	down
ENSG00000145687.16	0.154425	4.77088	4.48037	1.1119e-05	0.00160566	3.10538	SSBP2	protein_coding	up
ENSG00000125952.19	0.121398	6.75874	4.47728	1.12694e-05	0.00160566	3.06836	MAX	protein_coding	up
ENSG00000123329.18	0.182175	7.33259	4.47639	1.13135e-05	0.00160566	3.06687	ARHGAP9	protein_coding	up
ENSG00000102096.9	0.361915	4.2162	4.46639	1.18159e-05	0.00165913	3.0581	PIM2	protein_coding	up
ENSG00000198858.10	0.297261	6.63563	4.46251	1.20167e-05	0.00166956	3.01411	R3HDM4	protein_coding	up
ENSG00000010818.10	0.301138	4.9847	4.45947	1.2176e-05	0.00167408	3.0175	HIVEP2	protein_coding	up
ENSG00000115758.13	0.281647	4.7746	4.4552	1.24032e-05	0.00168773	3.00652	ODC1	protein_coding	up
ENSG00000179091.5	-0.149863	5.54687	-4.45008	1.26815e-05	0.00170058	2.98007	CYC1	protein_coding	down
ENSG00000100351.16	0.9273	2.32325	4.44713	1.28444e-05	0.00170058	2.86982	GRAP2	protein_coding	up
ENSG00000170275.14	-0.169442	7.67528	-4.44416	1.30105e-05	0.00170058	2.94567	CRTAP	protein_coding	down
ENSG00000198715.13	0.357837	4.59272	4.44412	1.3013e-05	0.00170058	2.96581	GLMP	protein_coding	up
ENSG00000074800.15	-0.138511	8.70484	-4.43877	1.33171e-05	0.00171003	2.92852	ENO1	protein_coding	down
ENSG00000088930.8	-0.111529	7.13523	-4.4383	1.33444e-05	0.00171003	2.92039	XRN2	protein_coding	down
ENSG00000163737.3	1.00832	2.54669	4.42713	1.40037e-05	0.00176001	2.82281	PF4	protein_coding	up
ENSG00000030582.18	-0.18866	9.08973	-4.42508	1.41277e-05	0.00176001	2.87569	GRN	protein_coding	down
ENSG00000108960.9	0.431454	3.73676	4.42497	1.41345e-05	0.00176001	2.89488	MMD	protein_coding	up
ENSG00000227507.2	0.421586	1.96756	4.41797	1.45673e-05	0.00176508	2.69845	LTB	protein_coding	up
ENSG00000165609.13	0.163004	4.40395	4.41772	1.45831e-05	0.00176508	2.86245	NUDT5	protein_coding	up
ENSG00000121552.4	-0.214008	6.49642	-4.4165	1.46599e-05	0.00176508	2.84818	CSTA	protein_coding	down
ENSG00000170271.11	0.510317	2.98955	4.4126	1.49079e-05	0.00176508	2.80652	FAXDC2	protein_coding	up
ENSG00000136830.12	-0.270206	6.43342	-4.41197	1.49481e-05	0.00176508	2.82229	FAM129B	protein_coding	down
ENSG00000134802.17	-0.183573	5.89834	-4.41151	1.49776e-05	0.00176508	2.82402	SLC43A3	protein_coding	down
ENSG00000174437.17	-0.171978	7.28495	-4.40364	1.54927e-05	0.00180353	2.77879	ATP2A2	protein_coding	down
ENSG00000151458.12	-0.212371	5.87275	-4.40238	1.55771e-05	0.00180353	2.78882	ANKRD50	protein_coding	down
ENSG00000075240.17	-0.197751	5.94505	-4.39912	1.57967e-05	0.00181305	2.77249	GRAMD4	protein_coding	down
ENSG00000138593.9	-0.13215	6.36329	-4.39466	1.61015e-05	0.0018321	2.74464	SECISBP2L	protein_coding	down
ENSG00000197061.4	0.322516	2.52287	4.38791	1.65741e-05	0.00186976	2.6744	HIST1H4C	protein_coding	up
ENSG00000158987.20	0.181842	5.37849	4.37931	1.71951e-05	0.00191949	2.69169	RAPGEF6	protein_coding	up
ENSG00000142676.14	-0.124547	7.63085	-4.37781	1.73058e-05	0.00191949	2.69576	RPL11	protein_coding	down
ENSG00000213281.5	-0.129257	6.42997	-4.37543	1.74831e-05	0.00192299	2.67357	NRAS	protein_coding	down
ENSG00000084754.12	-0.141154	7.57778	-4.37127	1.77968e-05	0.00194132	2.65409	HADHA	protein_coding	down
ENSG00000127527.14	0.144901	4.95825	4.3674	1.80924e-05	0.00195739	2.65721	EPS15L1	protein_coding	up
ENSG00000196967.10	0.181488	2.77496	4.36214	1.85029e-05	0.00196569	2.60836	ZNF585A	protein_coding	up
ENSG00000111266.8	0.26848	2.73001	4.36177	1.85328e-05	0.00196569	2.59675	DUSP16	protein_coding	up
ENSG00000091527.15	-0.108893	8.43337	-4.36072	1.86159e-05	0.00196569	2.61763	CDV3	protein_coding	down
ENSG00000130309.11	-0.136355	7.47467	-4.35578	1.90115e-05	0.00198678	2.59193	COLGALT1	protein_coding	down
ENSG00000136732.16	0.441189	4.90937	4.34979	1.95023e-05	0.00198678	2.59317	GYPC	protein_coding	up
ENSG00000135677.11	-0.154383	9.06787	-4.34562	1.98512e-05	0.00198678	2.56363	GNS	protein_coding	down
ENSG00000225470.7	0.257517	3.60899	4.34556	1.98565e-05	0.00198678	2.58723	JPX	lincRNA	up
ENSG00000147649.10	-0.113707	7.602	-4.34503	1.99013e-05	0.00198678	2.55327	MTDH	protein_coding	down
ENSG00000107581.13	-0.120215	7.76317	-4.34178	2.01779e-05	0.00198678	2.53865	EIF3A	protein_coding	down
ENSG00000166401.14	-0.181458	5.79756	-4.33694	2.05966e-05	0.00198678	2.52889	SERPINB8	protein_coding	down
ENSG00000147044.21	0.166571	3.97109	4.33581	2.06952e-05	0.00198678	2.54975	CASK	protein_coding	up
ENSG00000100784.12	0.224023	4.90352	4.33377	2.08754e-05	0.00198678	2.52452	RPS6KA5	protein_coding	up
ENSG00000068796.16	0.178051	5.27635	4.33278	2.09628e-05	0.00198678	2.51354	KIF2A	protein_coding	up
ENSG00000188735.13	0.191346	3.78619	4.32939	2.12665e-05	0.00198678	2.52499	TMEM120B	protein_coding	up
ENSG00000111275.13	-0.253823	7.27983	-4.32901	2.13006e-05	0.00198678	2.49524	ALDH2	protein_coding	down
ENSG00000149292.16	0.339573	1.11713	4.32893	2.13078e-05	0.00198678	2.13785	TTC12	protein_coding	up
ENSG00000065413.20	0.157796	7.95715	4.32821	2.13734e-05	0.00198678	2.48484	ANKRD44	protein_coding	up
ENSG00000154310.17	0.370125	2.73436	4.32714	2.147e-05	0.00198678	2.47845	TNIK	protein_coding	up
ENSG00000001036.13	-0.120658	5.32707	-4.327	2.14828e-05	0.00198678	2.50344	FUCA2	protein_coding	down
ENSG00000102317.18	-0.132234	7.43524	-4.32622	2.1554e-05	0.00198678	2.48031	RBM3	protein_coding	down
ENSG00000166398.12	0.151939	4.63599	4.32496	2.16691e-05	0.00198678	2.4971	KIAA0355	protein_coding	up
ENSG00000046651.15	0.150097	3.59409	4.32489	2.16756e-05	0.00198678	2.50814	OFD1	protein_coding	up
ENSG00000278828.1	0.36274	3.86301	4.31698	2.24132e-05	0.00202347	2.47875	HIST1H3H	protein_coding	up
ENSG00000071051.14	0.209478	4.24253	4.31649	2.24601e-05	0.00202347	2.47242	NCK2	protein_coding	up
ENSG00000071082.11	-0.214186	8.31673	-4.31569	2.25358e-05	0.00202347	2.44742	RPL31	protein_coding	down
ENSG00000104205.14	-0.141966	5.97	-4.30758	2.33218e-05	0.0020733	2.41661	SGK3	protein_coding	down
ENSG00000139737.22	0.272489	1.64843	4.30673	2.34049e-05	0.0020733	2.19879	SLAIN1	protein_coding	up
ENSG00000236088.9	0.24415	1.71315	4.30328	2.37485e-05	0.00208971	2.2057	COX10-AS1	processed_transcript	up
ENSG00000204282.4	0.221261	4.01855	4.29876	2.42048e-05	0.00210602	2.4078	TNRC6C-AS1	processed_transcript	up
ENSG00000068354.16	0.144718	3.83857	4.29716	2.43688e-05	0.00210602	2.40321	TBC1D25	protein_coding	up
ENSG00000135046.14	-0.22805	8.67152	-4.29674	2.44125e-05	0.00210602	2.37567	ANXA1	protein_coding	down
ENSG00000196998.18	0.136618	5.63018	4.28803	2.53234e-05	0.00217041	2.32946	WDR45	protein_coding	up
ENSG00000136280.16	0.139622	5.63555	4.28435	2.57188e-05	0.00217608	2.31899	CCM2	protein_coding	up
ENSG00000099385.11	-0.13532	3.66457	-4.28434	2.57192e-05	0.00217608	2.35095	BCL7C	protein_coding	down
ENSG00000270049.2	0.30044	1.17159	4.28276	2.58908e-05	0.00217664	1.95016	AC009061.2	antisense	up
ENSG00000131143.8	-0.120047	6.33736	-4.27765	2.64526e-05	0.00220979	2.30311	COX4I1	protein_coding	down
ENSG00000186660.15	-0.141186	7.12949	-4.27077	2.72275e-05	0.00226022	2.25963	ZFP91	protein_coding	down
ENSG00000022567.9	0.279088	4.89219	4.26763	2.75879e-05	0.00226471	2.27036	SLC45A4	protein_coding	up
ENSG00000101439.9	-0.183607	9.33255	-4.26731	2.76247e-05	0.00226471	2.2613	CST3	protein_coding	down
ENSG00000162722.9	0.694023	3.34304	4.26552	2.7833e-05	0.00226509	2.27142	TRIM58	protein_coding	up
ENSG00000161654.9	-0.100679	6.05099	-4.26433	2.79725e-05	0.00226509	2.23833	LSM12	protein_coding	down
ENSG00000159023.21	0.279473	7.48042	4.26075	2.83947e-05	0.00228525	2.21924	EPB41	protein_coding	up
ENSG00000104408.9	-0.184693	7.983	-4.24925	2.97929e-05	0.00236974	2.1862	EIF3E	protein_coding	down
ENSG00000154760.14	0.288903	2.25042	4.24916	2.98035e-05	0.00236974	2.12812	SLFN13	protein_coding	up
ENSG00000145335.15	0.623387	3.79315	4.24516	3.03055e-05	0.00239522	2.20661	SNCA	protein_coding	up
ENSG00000231074.8	0.220187	4.54518	4.23945	3.1036e-05	0.00242556	2.17014	HCG18	antisense	up
ENSG00000122417.15	0.235959	2.53317	4.23929	3.10569e-05	0.00242556	2.13219	ODF2L	protein_coding	up
ENSG00000171552.13	0.392199	5.00217	4.2357	3.15254e-05	0.00244767	2.15476	BCL2L1	protein_coding	up
ENSG00000116586.11	0.145755	3.46085	4.23227	3.19791e-05	0.00246838	2.15352	LAMTOR2	protein_coding	up
ENSG00000075884.14	0.213923	5.43629	4.2206	3.35684e-05	0.00255806	2.07572	ARHGAP15	protein_coding	up
ENSG00000184007.21	-0.142048	8.67038	-4.22006	3.36438e-05	0.00255806	2.07737	PTP4A2	protein_coding	down
ENSG00000056558.11	0.25729	3.76388	4.21699	3.40752e-05	0.00255806	2.10105	TRAF1	protein_coding	up
ENSG00000099804.9	0.256556	4.89042	4.21661	3.413e-05	0.00255806	2.07652	CDC34	protein_coding	up
ENSG00000137876.10	-0.185579	5.80628	-4.21552	3.42847e-05	0.00255806	2.07771	RSL24D1	protein_coding	down
ENSG00000171298.13	-0.211594	7.38162	-4.21344	3.45812e-05	0.00255806	2.04154	GAA	protein_coding	down
ENSG00000105287.12	0.158038	5.12523	4.21277	3.46782e-05	0.00255806	2.06013	PRKD2	protein_coding	up
ENSG00000108861.9	-0.157913	6.58144	-4.21268	3.46915e-05	0.00255806	2.04214	DUSP3	protein_coding	down
ENSG00000180871.8	0.601896	4.3659	4.20849	3.52981e-05	0.00258833	2.06817	CXCR2	protein_coding	up
ENSG00000102871.16	0.146853	3.88262	4.20614	3.56444e-05	0.00259929	2.06083	TRADD	protein_coding	up
ENSG00000177575.12	-0.289139	6.99796	-4.20409	3.59482e-05	0.00260704	2.01941	CD163	protein_coding	down
ENSG00000153560.12	-0.126995	6.48933	-4.19323	3.76004e-05	0.00271195	1.9603	UBP1	protein_coding	down
ENSG00000120333.4	0.130607	3.12358	4.19071	3.79943e-05	0.00271632	1.99495	MRPS14	protein_coding	up
ENSG00000138735.16	0.543653	2.89382	4.18971	3.81504e-05	0.00271632	1.98592	PDE5A	protein_coding	up
ENSG00000136908.17	0.26851	3.90668	4.1889	3.82783e-05	0.00271632	1.99613	DPM2	protein_coding	up
ENSG00000197324.9	0.215653	7.25265	4.18619	3.87091e-05	0.00271975	1.93612	LRP10	protein_coding	up
ENSG00000152270.9	0.194822	5.73153	4.18601	3.87388e-05	0.00271975	1.93755	PDE3B	protein_coding	up
ENSG00000158856.18	1.07947	1.47652	4.18129	3.95005e-05	0.00275088	1.64981	DMTN	protein_coding	up
ENSG00000124181.14	0.438147	1.89361	4.18068	3.9599e-05	0.00275088	1.81707	PLCG1	protein_coding	up
ENSG00000120705.13	-0.125606	6.42404	-4.17405	4.0696e-05	0.00281229	1.89784	ETF1	protein_coding	down
ENSG00000158122.12	-0.138697	4.39292	-4.16889	4.15691e-05	0.00282716	1.917	PRXL2C	protein_coding	down
ENSG00000075415.12	-0.100982	7.70683	-4.16889	4.15696e-05	0.00282716	1.87139	SLC25A3	protein_coding	down
ENSG00000103994.17	-0.149689	8.77356	-4.16787	4.17445e-05	0.00282716	1.87771	ZNF106	protein_coding	down
ENSG00000136213.10	0.272534	3.81398	4.16687	4.19171e-05	0.00282716	1.91463	CHST12	protein_coding	up
ENSG00000107281.10	0.456453	0.0449179	4.16479	4.22767e-05	0.00282716	1.00693	NPDC1	protein_coding	up
ENSG00000135439.11	0.219665	3.79626	4.16432	4.23585e-05	0.00282716	1.90528	AGAP2	protein_coding	up
ENSG00000091436.17	-0.198981	6.03972	-4.1639	4.24312e-05	0.00282716	1.86655	MAP3K20	protein_coding	down
ENSG00000106351.13	0.303866	1.85891	4.16165	4.28248e-05	0.00282716	1.73578	AGFG2	protein_coding	up
ENSG00000127334.10	0.140291	5.68617	4.16095	4.29484e-05	0.00282716	1.84338	DYRK2	protein_coding	up
ENSG00000102445.18	0.296354	3.52395	4.16036	4.30533e-05	0.00282716	1.89187	RUBCNL	protein_coding	up
ENSG00000179295.17	-0.132495	6.5829	-4.15833	4.34142e-05	0.00283675	1.83403	PTPN11	protein_coding	down
ENSG00000175463.11	0.166195	5.49023	4.15453	4.4095e-05	0.00286705	1.82717	TBC1D10C	protein_coding	up
ENSG00000044115.21	-0.168953	7.63731	-4.14937	4.50384e-05	0.00290401	1.80306	CTNNA1	protein_coding	down
ENSG00000196914.9	0.308609	4.2623	4.14902	4.51035e-05	0.00290401	1.83681	ARHGEF12	protein_coding	up
ENSG00000170759.11	-0.108229	7.28682	-4.14775	4.53385e-05	0.00290496	1.79504	KIF5B	protein_coding	down
ENSG00000137216.19	0.252457	4.0881	4.14543	4.57722e-05	0.00291859	1.83301	TMEM63B	protein_coding	up
ENSG00000198952.8	0.229628	6.12547	4.143	4.62297e-05	0.00293359	1.77085	SMG5	protein_coding	up
ENSG00000142546.13	0.193406	4.47812	4.14042	4.67199e-05	0.00293904	1.80369	NOSIP	protein_coding	up
ENSG00000129353.15	0.247443	6.60406	4.14021	4.6761e-05	0.00293904	1.76255	SLC44A2	protein_coding	up
ENSG00000088812.18	-0.138794	6.04714	-4.13847	4.70949e-05	0.002946	1.76632	ATRN	protein_coding	down
ENSG00000123338.13	-0.112782	8.91479	-4.1325	4.82573e-05	0.00300447	1.7463	NCKAP1L	protein_coding	down
ENSG00000263264.1	0.192293	3.83638	4.12678	4.93981e-05	0.00306106	1.7667	AC119396.1	protein_coding	up
ENSG00000145391.13	-0.180771	6.29214	-4.12348	5.00684e-05	0.0030881	1.70694	SETD7	protein_coding	down
ENSG00000156261.13	-0.175138	6.40238	-4.12083	5.06122e-05	0.00310712	1.70219	CCT8	protein_coding	down
ENSG00000174007.8	0.285726	1.79756	4.11629	5.15561e-05	0.00314775	1.58532	CEP19	protein_coding	up
ENSG00000198056.14	0.213042	1.7646	4.11526	5.17748e-05	0.00314775	1.57307	PRIM1	protein_coding	up
ENSG00000205268.10	0.203149	5.24915	4.11424	5.19894e-05	0.00314775	1.6781	PDE7A	protein_coding	up
ENSG00000196405.13	0.279961	5.75309	4.11076	5.27301e-05	0.00317801	1.65484	EVL	protein_coding	up
ENSG00000177272.9	0.338654	3.64711	4.10584	5.37975e-05	0.00322106	1.69178	KCNA3	protein_coding	up
ENSG00000183258.12	-0.12339	5.34279	-4.10425	5.41451e-05	0.00322106	1.65302	DDX41	protein_coding	down
ENSG00000153944.11	0.135216	5.05737	4.10272	5.44826e-05	0.00322106	1.63981	MSI2	protein_coding	up
ENSG00000155465.18	-0.181908	7.89894	-4.10266	5.44973e-05	0.00322106	1.62769	SLC7A7	protein_coding	down
ENSG00000270629.6	-0.183066	7.4699	-4.1019	5.46646e-05	0.00322106	1.62169	NBPF14	protein_coding	down
ENSG00000187446.12	-0.146786	8.01769	-4.09669	5.5834e-05	0.00327535	1.60235	CHP1	protein_coding	down
ENSG00000104824.17	-0.083708	7.73974	-4.09305	5.66649e-05	0.00330146	1.58581	HNRNPL	protein_coding	down
ENSG00000106066.15	-0.184345	8.13253	-4.09255	5.67794e-05	0.00330146	1.59864	CPVL	protein_coding	down
ENSG00000139433.10	-0.109726	6.29938	-4.09021	5.7319e-05	0.00331822	1.58226	GLTP	protein_coding	down
ENSG00000116260.17	-0.168484	6.83373	-4.08853	5.77115e-05	0.00332635	1.57157	QSOX1	protein_coding	down
ENSG00000169896.17	-0.199771	8.88284	-4.08445	5.86738e-05	0.00336711	1.56701	ITGAM	protein_coding	down
ENSG00000256594.8	0.1643	4.44299	4.07599	6.07155e-05	0.00345525	1.56073	AC010186.2	transcribed_unprocessed_pseudogene	up
ENSG00000083838.15	0.176056	2.57162	4.07487	6.09909e-05	0.00345525	1.54004	ZNF446	protein_coding	up
ENSG00000117632.23	0.354057	1.23789	4.07485	6.09951e-05	0.00345525	1.28041	STMN1	protein_coding	up
ENSG00000164023.14	-0.20134	6.124	-4.07362	6.13011e-05	0.00345775	1.5325	SGMS2	protein_coding	down
ENSG00000137710.15	-0.134637	5.01145	-4.07021	6.21489e-05	0.00348671	1.53696	RDX	protein_coding	down
ENSG00000143207.21	0.0931607	6.1882	4.06944	6.23429e-05	0.00348671	1.49853	COP1	protein_coding	up
ENSG00000184232.9	-0.147502	4.79318	-4.06803	6.27006e-05	0.00349192	1.53703	OAF	protein_coding	down
ENSG00000198089.15	0.143798	4.58048	4.05934	6.49357e-05	0.0036012	1.49738	SFI1	protein_coding	up
ENSG00000106546.14	-0.264571	8.28785	-4.05528	6.60052e-05	0.00363162	1.45586	AHR	protein_coding	down
ENSG00000068383.19	0.151288	3.89576	4.05517	6.60345e-05	0.00363162	1.50389	INPP5A	protein_coding	up
ENSG00000181467.4	-0.104407	7.65378	-4.04887	6.77289e-05	0.00370487	1.42451	RAP2B	protein_coding	down
ENSG00000142784.16	0.161909	6.17812	4.04587	6.85502e-05	0.00370487	1.41423	WDTC1	protein_coding	up
ENSG00000185896.11	-0.158558	7.98815	-4.04586	6.85541e-05	0.00370487	1.41393	LAMP1	protein_coding	down
ENSG00000079335.20	0.15169	4.23104	4.04531	6.87061e-05	0.00370487	1.45667	CDC14A	protein_coding	up
ENSG00000146463.11	-0.0935621	6.04678	-4.04508	6.87698e-05	0.00370487	1.41877	ZMYM4	protein_coding	down
ENSG00000213402.3	0.469596	1.77195	4.04263	6.9449e-05	0.0037222	1.33296	PTPRCAP	protein_coding	up
ENSG00000197818.11	0.13598	5.04525	4.04157	6.97467e-05	0.0037222	1.42015	SLC9A8	protein_coding	up
ENSG00000178209.15	-0.191757	9.5732	-4.04089	6.99376e-05	0.0037222	1.41578	PLEC	protein_coding	down
ENSG00000176171.11	0.229971	2.92145	4.03586	7.13625e-05	0.00376875	1.43353	BNIP3	protein_coding	up
ENSG00000065534.18	0.565007	2.06474	4.03547	7.14748e-05	0.00376875	1.363	MYLK	protein_coding	up
ENSG00000170345.10	-0.267747	10.8561	-4.03479	7.16687e-05	0.00376875	1.41254	FOS	protein_coding	down
ENSG00000147454.14	0.308443	7.31695	4.03302	7.21803e-05	0.00378059	1.36344	SLC25A37	protein_coding	up
ENSG00000136381.13	-0.139089	6.83723	-4.03187	7.2513e-05	0.003783	1.35907	IREB2	protein_coding	down
ENSG00000085265.11	-0.223556	11.0547	-4.03055	7.28983e-05	0.00378813	1.39804	FCN1	protein_coding	down
ENSG00000204160.12	0.266203	5.72435	4.02672	7.4024e-05	0.00382379	1.3521	ZDHHC18	protein_coding	up
ENSG00000121104.8	0.260021	5.04742	4.02625	7.41639e-05	0.00382379	1.36852	FAM117A	protein_coding	up
ENSG00000173726.11	-0.131198	6.66993	-4.02485	7.45814e-05	0.00383035	1.33907	TOMM20	protein_coding	down
ENSG00000107854.6	-0.109361	7.27978	-4.02017	7.59906e-05	0.00388286	1.31578	TNKS2	protein_coding	down
ENSG00000196182.10	0.141159	6.54893	4.0195	7.61922e-05	0.00388286	1.31429	STK40	protein_coding	up
ENSG00000116459.11	-0.106059	6.24565	-4.01349	7.80464e-05	0.00396205	1.30934	ATP5PB	protein_coding	down
ENSG00000184900.15	-0.161087	5.90402	-4.01218	7.84543e-05	0.0039675	1.29943	SUMO3	protein_coding	down
ENSG00000137815.14	-0.103906	5.86831	-4.00953	7.92871e-05	0.00399432	1.28496	RTF1	protein_coding	down
ENSG00000165071.14	0.184998	6.43882	4.00805	7.97585e-05	0.00400278	1.26922	TMEM71	protein_coding	up
ENSG00000108588.14	-0.144351	5.56352	-4.00555	8.05565e-05	0.00402752	1.28312	CCDC47	protein_coding	down
ENSG00000120742.11	-0.100548	7.61675	-4.00227	8.16157e-05	0.0040387	1.2571	SERP1	protein_coding	down
ENSG00000171490.13	-0.142755	6.87979	-4.00138	8.19077e-05	0.0040387	1.25541	RSL1D1	protein_coding	down
ENSG00000100307.13	0.190267	4.58411	4.0013	8.19313e-05	0.0040387	1.28949	CBX7	protein_coding	up
ENSG00000132819.17	0.350822	6.31287	4.00108	8.20041e-05	0.0040387	1.25001	RBM38	protein_coding	up
ENSG00000178802.18	0.125503	4.1107	3.99992	8.23849e-05	0.00404237	1.29834	MPI	protein_coding	up
ENSG00000023191.17	-0.123827	7.50698	-3.98949	8.58757e-05	0.00419805	1.21044	RNH1	protein_coding	down
ENSG00000114867.20	-0.120788	7.56509	-3.97889	8.95652e-05	0.00436225	1.16814	EIF4G1	protein_coding	down
ENSG00000166965.12	0.312616	2.27915	3.97745	9.00772e-05	0.00436457	1.18438	RCCD1	protein_coding	up
ENSG00000228474.6	0.155654	6.28196	3.97583	9.06594e-05	0.00436457	1.1514	OST4	protein_coding	up
ENSG00000107679.14	0.209471	3.62351	3.97494	9.09779e-05	0.00436457	1.22103	PLEKHA1	protein_coding	up
ENSG00000101577.9	0.149777	6.04836	3.97462	9.10958e-05	0.00436457	1.14901	LPIN2	protein_coding	up
ENSG00000082014.16	-0.169682	6.22629	-3.97354	9.1486e-05	0.00436457	1.15793	SMARCD3	protein_coding	down
ENSG00000033170.16	0.23051	2.53612	3.97321	9.16047e-05	0.00436457	1.1947	FUT8	protein_coding	up
ENSG00000198231.13	-0.116632	6.3783	-3.97232	9.19275e-05	0.00436457	1.1427	DDX42	protein_coding	down
ENSG00000197603.14	0.218712	3.54131	3.96969	9.28909e-05	0.0043945	1.20436	CPLANE1	protein_coding	up
ENSG00000198876.13	0.33565	6.59668	3.96566	9.43831e-05	0.00444915	1.12029	DCAF12	protein_coding	up
ENSG00000165406.16	0.277834	6.06621	3.96467	9.47544e-05	0.00445076	1.11542	2025-03-08	protein_coding	up
ENSG00000105967.16	-0.181817	6.90721	-3.95901	9.68988e-05	0.00452613	1.108	TFEC	protein_coding	down
ENSG00000155090.15	-0.203306	8.13689	-3.95862	9.70449e-05	0.00452613	1.11226	KLF10	protein_coding	down
ENSG00000152234.16	-0.102695	7.5009	-3.95362	9.89808e-05	0.00460017	1.08055	ATP5F1A	protein_coding	down
ENSG00000071073.13	0.188583	5.20527	3.95081	0.000100085	0.00463516	1.08139	MGAT4A	protein_coding	up
ENSG00000232859.9	0.215383	1.99285	3.94579	0.000102085	0.00471124	1.03761	LYRM9	protein_coding	up
ENSG00000111142.14	-0.130631	5.17782	-3.94451	0.000102601	0.00471858	1.07846	METAP2	protein_coding	down
ENSG00000089775.11	0.148915	4.45499	3.94218	0.000103544	0.00473392	1.07684	ZBTB25	protein_coding	up
ENSG00000160445.11	0.188764	5.14844	3.94192	0.000103652	0.00473392	1.05635	ZER1	protein_coding	up
ENSG00000168497.5	0.840043	3.36377	3.94098	0.000104034	0.004735	1.10602	CAVIN2	protein_coding	up
ENSG00000057252.13	-0.119838	6.94319	-3.93634	0.000105951	0.00479795	1.01401	SOAT1	protein_coding	down
ENSG00000198948.12	0.808405	1.81621	3.9358	0.000106177	0.00479795	0.988403	MFAP3L	protein_coding	up
ENSG00000180776.15	-0.215541	8.0191	-3.93501	0.000106508	0.00479795	1.01774	ZDHHC20	protein_coding	down
ENSG00000214212.9	-0.143534	6.83853	-3.93189	0.000107823	0.00482382	0.999772	C19orf38	protein_coding	down
ENSG00000196365.11	-0.108514	4.50734	-3.93153	0.000107976	0.00482382	1.05074	LONP1	protein_coding	down
ENSG00000117394.21	0.430119	2.0464	3.93105	0.000108179	0.00482382	0.990802	SLC2A1	protein_coding	up
ENSG00000100994.12	-0.11556	5.68107	-3.92809	0.000109441	0.0048637	1.00044	PYGB	protein_coding	down
ENSG00000196743.8	-0.229439	7.31001	-3.92643	0.000110158	0.00486719	0.981986	GM2A	protein_coding	down
ENSG00000149782.11	-0.186187	4.60216	-3.9262	0.000110258	0.00486719	1.03383	PLCB3	protein_coding	down
ENSG00000171853.16	0.14865	5.40302	3.92169	0.000112226	0.00493757	0.97522	TRAPPC12	protein_coding	up
ENSG00000090376.10	-0.16466	8.59634	-3.9193	0.000113281	0.00496745	0.963921	IRAK3	protein_coding	down
ENSG00000116151.14	0.218052	1.25789	3.91683	0.000114382	0.00498394	0.770883	MORN1	protein_coding	up
ENSG00000038532.16	0.101487	5.63414	3.9164	0.000114577	0.00498394	0.948578	CLEC16A	protein_coding	up
ENSG00000105053.11	0.151908	4.77908	3.91592	0.00011479	0.00498394	0.974629	VRK3	protein_coding	up
ENSG00000159346.13	0.204663	7.71875	3.91477	0.000115312	0.00499018	0.93539	ADIPOR1	protein_coding	up
ENSG00000172057.10	0.197189	3.85164	3.91384	0.000115729	0.00499185	1.00107	ORMDL3	protein_coding	up
ENSG00000254838.5	0.274615	5.3294	3.9117	0.000116703	0.00500551	0.943387	GVINP1	transcribed_unprocessed_pseudogene	up
ENSG00000153786.12	-0.162617	8.06163	-3.91148	0.000116804	0.00500551	0.930806	ZDHHC7	protein_coding	down
ENSG00000115355.16	-0.133972	7.7693	-3.90799	0.000118409	0.00505786	0.919838	CCDC88A	protein_coding	down
ENSG00000135678.12	-0.187903	4.98657	-3.90506	0.000119775	0.00509972	0.941448	CPM	protein_coding	down
ENSG00000008517.16	0.675311	0.831176	3.8999	0.000122213	0.00518678	0.660277	IL32	protein_coding	up
ENSG00000117020.17	0.208112	4.60977	3.89669	0.000123754	0.00522672	0.911644	AKT3	protein_coding	up
ENSG00000073605.18	0.24291	1.96155	3.89629	0.000123946	0.00522672	0.872531	GSDMB	protein_coding	up
ENSG00000163131.11	-0.144363	11.8623	-3.89246	0.00012581	0.00526664	0.914743	CTSS	protein_coding	down
ENSG00000005022.6	-0.146786	7.02623	-3.89036	0.000126844	0.00526664	0.853013	SLC25A5	protein_coding	down
ENSG00000184863.11	0.0766044	7.30534	3.89031	0.000126868	0.00526664	0.842748	RBM33	protein_coding	up
ENSG00000196284.16	0.268443	1.17679	3.88998	0.000127035	0.00526664	0.673593	SUPT3H	protein_coding	up
ENSG00000181896.12	0.159972	3.92386	3.88974	0.000127152	0.00526664	0.914526	ZNF101	protein_coding	up
ENSG00000107960.11	0.155559	4.44919	3.88947	0.000127287	0.00526664	0.892246	STN1	protein_coding	up
ENSG00000104081.14	-0.223879	6.6554	-3.88671	0.000128662	0.00530692	0.843479	BMF	protein_coding	down
ENSG00000068831.19	0.1086	6.42458	3.88503	0.000129503	0.00532495	0.825717	RASGRP2	protein_coding	up
ENSG00000125910.5	0.242816	5.31361	3.88135	0.000131371	0.00535776	0.84073	S1PR4	protein_coding	up
ENSG00000109111.15	-0.0814292	6.67076	-3.8812	0.000131448	0.00535776	0.811926	SUPT6H	protein_coding	down
ENSG00000126247.10	-0.154818	8.06094	-3.88106	0.000131519	0.00535776	0.819085	CAPNS1	protein_coding	down
ENSG00000169871.13	0.119858	5.65088	3.87913	0.000132508	0.00538146	0.815526	TRIM56	protein_coding	up
ENSG00000168172.9	-0.133641	7.75469	-3.87462	0.000134855	0.00544398	0.796585	HOOK3	protein_coding	down
ENSG00000126091.20	0.213183	2.35141	3.87458	0.000134872	0.00544398	0.841526	ST3GAL3	protein_coding	up
ENSG00000170385.10	-0.17882	6.68739	-3.86906	0.000137795	0.00554499	0.779163	SLC30A1	protein_coding	down
ENSG00000049860.14	-0.119611	7.08879	-3.86692	0.000138944	0.00556859	0.772041	HEXB	protein_coding	down
ENSG00000025796.14	-0.135105	5.89661	-3.8664	0.000139225	0.00556859	0.776237	SEC63	protein_coding	down
ENSG00000189180.15	0.134479	5.57253	3.86309	0.000141019	0.00560152	0.760932	ZNF33A	protein_coding	up
ENSG00000062282.15	0.238328	4.87213	3.86221	0.000141502	0.00560152	0.781898	DGAT2	protein_coding	up
ENSG00000132471.12	0.154311	6.36149	3.86187	0.00014169	0.00560152	0.760126	WBP2	protein_coding	up
ENSG00000180628.15	0.161064	6.79861	3.86136	0.000141967	0.00560152	0.739403	PCGF5	protein_coding	up
ENSG00000147677.11	-0.100546	7.61587	-3.86099	0.000142171	0.00560152	0.747875	EIF3H	protein_coding	down
ENSG00000157240.3	-0.226386	4.99711	-3.85873	0.000143425	0.00560951	0.785345	FZD1	protein_coding	down
ENSG00000124570.19	-0.110036	6.47308	-3.85872	0.00014343	0.00560951	0.735451	SERPINB6	protein_coding	down
ENSG00000155903.11	0.11518	5.66335	3.85832	0.000143648	0.00560951	0.741272	RASA2	protein_coding	up
ENSG00000122085.17	0.138944	4.23401	3.8563	0.000144775	0.00563683	0.782964	MTERF4	protein_coding	up
ENSG00000089597.18	-0.118313	7.1087	-3.85525	0.000145368	0.00564327	0.722737	GANAB	protein_coding	down
ENSG00000102804.15	0.223423	4.98792	3.85412	0.000146006	0.0056514	0.744459	TSC22D1	protein_coding	up
ENSG00000149311.18	0.134422	8.01181	3.85126	0.000147629	0.00569752	0.715231	ATM	protein_coding	up
ENSG00000169504.15	-0.176796	6.25282	-3.84938	0.000148703	0.00572223	0.71621	CLIC4	protein_coding	down
ENSG00000105127.9	-0.103779	5.37345	-3.84596	0.00015068	0.00578145	0.713631	AKAP8	protein_coding	down
ENSG00000196776.16	0.128574	6.99086	3.84469	0.000151421	0.00579169	0.68023	CD47	protein_coding	up
ENSG00000076662.10	0.183422	7.7088	3.844	0.000151824	0.00579169	0.685515	ICAM3	protein_coding	up
ENSG00000197852.11	0.28278	4.73408	3.84309	0.00015236	0.00579537	0.724013	INKA2	protein_coding	up
ENSG00000113273.17	-0.1559	6.1178	-3.84153	0.000153276	0.00581347	0.686266	ARSB	protein_coding	down
ENSG00000169727.12	-0.080523	5.7218	-3.83743	0.000155721	0.00588353	0.673421	GPS1	protein_coding	down
ENSG00000140416.21	0.219174	3.17859	3.83664	0.000156197	0.00588353	0.747704	TPM1	protein_coding	up
ENSG00000085449.15	-0.118155	6.75449	-3.8362	0.00015646	0.00588353	0.662129	WDFY1	protein_coding	down
ENSG00000238160.1	0.316057	1.61042	3.83514	0.000157103	0.00588584	0.627009	AC116366.2	antisense	up
ENSG00000127824.14	0.185686	5.37069	3.83446	0.000157511	0.00588584	0.667204	TUBA4A	protein_coding	up
ENSG00000168256.18	-0.131301	5.77066	-3.83389	0.00015786	0.00588584	0.663129	NKIRAS2	protein_coding	down
ENSG00000164244.20	-0.0826203	5.82871	-3.83226	0.000158855	0.00589661	0.652818	PRRC1	protein_coding	down
ENSG00000111859.17	0.156178	6.44324	3.83195	0.000159042	0.00589661	0.634847	NEDD9	protein_coding	up
ENSG00000187840.5	-0.126661	4.36718	-3.83068	0.00015982	0.00590887	0.70598	EIF4EBP1	protein_coding	down
ENSG00000006534.16	-0.128056	6.49397	-3.82785	0.000161574	0.00595702	0.633976	ALDH3B1	protein_coding	down
ENSG00000168615.12	-0.181017	5.67382	-3.82557	0.000162993	0.00597707	0.651603	ADAM9	protein_coding	down
ENSG00000135124.14	-0.173042	5.51389	-3.82552	0.000163023	0.00597707	0.641669	P2RX4	protein_coding	down
ENSG00000168003.16	-0.138339	6.24604	-3.82479	0.000163485	0.00597741	0.628755	SLC3A2	protein_coding	down
ENSG00000169045.17	-0.125364	8.2152	-3.82355	0.000164266	0.00598934	0.619071	HNRNPH1	protein_coding	down
ENSG00000109113.20	-0.164883	4.48601	-3.82249	0.000164934	0.00599715	0.677671	RAB34	protein_coding	down
ENSG00000166169.17	0.175916	4.30127	3.81891	0.000167217	0.00606346	0.653635	POLL	protein_coding	up
ENSG00000104687.14	-0.131583	6.37613	-3.81587	0.000169178	0.00611609	0.595646	GSR	protein_coding	down
ENSG00000230590.10	0.135785	5.98986	3.81523	0.000169595	0.00611609	0.584729	FTX	lincRNA	up
ENSG00000100664.11	-0.124916	7.88218	-3.81154	0.000172016	0.00617255	0.575835	EIF5	protein_coding	down
ENSG00000176715.16	0.107046	5.42676	3.81141	0.000172096	0.00617255	0.583389	ACSF3	protein_coding	up
ENSG00000134086.7	-0.0958369	6.47852	-3.80993	0.000173078	0.00619094	0.566521	VHL	protein_coding	down
ENSG00000143772.9	0.127522	6.2711	3.80903	0.000173678	0.00619561	0.55661	ITPKB	protein_coding	up
ENSG00000205593.12	-0.206672	3.36413	-3.80289	0.000177806	0.00632578	0.634296	DENND6B	protein_coding	down
ENSG00000100596.6	-0.129279	7.91002	-3.79798	0.000181176	0.00640754	0.529924	SPTLC2	protein_coding	down
ENSG00000104973.18	0.166523	5.466	3.79795	0.000181197	0.00640754	0.54369	MED25	protein_coding	up
ENSG00000101162.3	0.700381	4.97928	3.79743	0.000181561	0.00640754	0.55231	TUBB1	protein_coding	up
ENSG00000117758.14	-0.139554	6.34698	-3.79507	0.000183201	0.00643322	0.522002	STX12	protein_coding	down
ENSG00000114850.6	-0.122595	7.17083	-3.79499	0.000183263	0.00643322	0.517925	SSR3	protein_coding	down
ENSG00000072858.10	0.363026	1.81029	3.79429	0.000183752	0.00643328	0.520839	SIDT1	protein_coding	up
ENSG00000243279.4	0.219962	1.68874	3.79201	0.000185355	0.00646399	0.479789	PRAF2	protein_coding	up
ENSG00000162852.14	0.13869	4.78514	3.79166	0.000185609	0.00646399	0.538381	CNST	protein_coding	up
ENSG00000241399.7	-0.142019	8.56638	-3.79052	0.000186416	0.00646528	0.509257	CD302	protein_coding	down
ENSG00000172059.11	-0.175832	6.69735	-3.78968	0.000187014	0.00646528	0.51101	KLF11	protein_coding	down
ENSG00000173535.14	0.455303	4.50299	3.78954	0.000187115	0.00646528	0.554381	TNFRSF10C	protein_coding	up
ENSG00000161204.11	-0.126142	4.89372	-3.78746	0.000188603	0.00648738	0.528204	ABCF3	protein_coding	down
ENSG00000112195.9	0.298406	3.1533	3.78727	0.000188738	0.00648738	0.582002	TREML2	protein_coding	up
ENSG00000182220.14	-0.106508	7.61432	-3.78257	0.000192153	0.00656924	0.476451	ATP6AP2	protein_coding	down
ENSG00000160305.18	0.124022	5.73764	3.78246	0.000192233	0.00656924	0.473998	DIP2A	protein_coding	up
ENSG00000247774.6	0.409713	1.29651	3.78194	0.000192613	0.00656924	0.390632	PCED1B-AS1	processed_transcript	up
ENSG00000174748.20	-0.112135	9.61774	-3.77897	0.000194809	0.0066125	0.486857	RPL15	protein_coding	down
ENSG00000174501.14	0.206595	3.25311	3.77887	0.000194883	0.0066125	0.551694	ANKRD36C	protein_coding	up
ENSG00000141376.22	0.13179	4.72791	3.77791	0.000195592	0.00661955	0.491492	BCAS3	protein_coding	up
ENSG00000175115.12	0.124661	6.81968	3.77698	0.000196288	0.00662304	0.44949	PACS1	protein_coding	up
ENSG00000134597.16	-0.106531	3.63744	-3.77643	0.000196699	0.00662304	0.541606	RBMX2	protein_coding	down
ENSG00000103351.13	0.229207	1.89823	3.77433	0.000198278	0.00665921	0.47442	CLUAP1	protein_coding	up
ENSG00000185883.12	0.158402	7.49643	3.77319	0.000199141	0.00666856	0.463367	ATP6V0C	protein_coding	up
ENSG00000147604.14	-0.210779	8.78865	-3.77262	0.000199567	0.00666856	0.460884	RPL7	protein_coding	down
ENSG00000180822.11	0.180665	3.08748	3.77059	0.000201116	0.00670337	0.526098	PSMG4	protein_coding	up
ENSG00000157500.12	-0.0963364	6.23148	-3.76955	0.000201913	0.00671296	0.434436	APPL1	protein_coding	down
ENSG00000158473.6	-0.231174	6.12057	-3.76731	0.000203642	0.00674081	0.440719	CD1D	protein_coding	down
ENSG00000119686.10	-0.239455	5.14468	-3.76714	0.000203772	0.00674081	0.459141	FLVCR2	protein_coding	down
ENSG00000100077.15	-0.168553	7.5419	-3.76614	0.000204541	0.00674745	0.419681	GRK3	protein_coding	down
ENSG00000128604.20	-0.193129	7.1297	-3.76556	0.000204995	0.00674745	0.415819	IRF5	protein_coding	down
ENSG00000160588.10	0.219288	4.18352	3.7649	0.000205514	0.0067477	0.472855	MPZL3	protein_coding	up
ENSG00000127663.15	0.121749	6.43396	3.76182	0.000207929	0.00678948	0.393352	KDM4B	protein_coding	up
ENSG00000113282.13	-0.0988127	6.77279	-3.76136	0.000208288	0.00678948	0.395511	CLINT1	protein_coding	down
ENSG00000182899.16	-0.139551	7.28001	-3.76121	0.000208405	0.00678948	0.412499	RPL35A	protein_coding	down
ENSG00000204406.13	0.147488	4.64194	3.76066	0.000208844	0.00678948	0.435874	MBD5	protein_coding	up
ENSG00000275379.1	0.310034	1.6415	3.75964	0.000209656	0.00679914	0.375948	HIST1H3I	protein_coding	up
ENSG00000125834.12	0.134467	4.31807	3.75485	0.000213497	0.00690675	0.432861	STK35	protein_coding	up
ENSG00000114126.17	0.219975	3.47749	3.7525	0.000215405	0.00695143	0.459062	TFDP2	protein_coding	up
ENSG00000157551.19	0.424188	3.54616	3.75094	0.00021668	0.00696807	0.455966	KCNJ15	protein_coding	up
ENSG00000154473.18	0.0796235	5.51215	3.74913	0.000218165	0.00696807	0.365095	BUB3	protein_coding	up
ENSG00000143797.12	0.22383	3.95564	3.7491	0.000218195	0.00696807	0.427405	MBOAT2	protein_coding	up
ENSG00000138600.10	-0.0868719	6.04767	-3.74883	0.000218413	0.00696807	0.358056	SPPL2A	protein_coding	down
ENSG00000140743.8	0.215934	2.30123	3.74865	0.00021856	0.00696807	0.428333	AC092338.1	protein_coding	up
ENSG00000148158.17	-0.164566	7.33622	-3.74685	0.00022006	0.00699895	0.350398	SNX30	protein_coding	down
ENSG00000120533.13	-0.123596	5.35375	-3.74559	0.000221109	0.00701272	0.373813	ENY2	protein_coding	down
ENSG00000141384.12	0.212133	2.46253	3.74506	0.000221555	0.00701272	0.428049	TAF4B	protein_coding	up
ENSG00000198408.14	0.0990239	7.44951	3.74383	0.000222587	0.00702499	0.332243	OGA	protein_coding	up
ENSG00000151176.8	-0.202691	5.94275	-3.74285	0.000223412	0.00702499	0.360246	PLBD2	protein_coding	down
ENSG00000111371.15	0.47513	3.61256	3.7427	0.000223539	0.00702499	0.422968	SLC38A1	protein_coding	up
ENSG00000136436.14	-0.0914542	7.11287	-3.74143	0.000224611	0.00703308	0.327999	CALCOCO2	protein_coding	down
ENSG00000152102.18	-0.121308	6.24522	-3.74113	0.000224863	0.00703308	0.328865	FAM168B	protein_coding	down
ENSG00000108384.15	0.261303	1.37472	3.73909	0.000226609	0.00707094	0.284527	RAD51C	protein_coding	up
ENSG00000111911.7	-0.123639	4.18815	-3.73608	0.000229197	0.00713483	0.393619	HINT3	protein_coding	down
ENSG00000264920.1	0.279771	0.541667	3.73391	0.000231079	0.00717649	0.0243893	AC018521.5	processed_transcript	up
ENSG00000148019.13	0.219419	3.2948	3.73269	0.000232147	0.00719273	0.396177	CEP78	protein_coding	up
ENSG00000198689.11	-0.0892237	5.02236	-3.73075	0.000233846	0.00721575	0.330557	SLC9A6	protein_coding	down
ENSG00000100225.18	0.211074	6.88273	3.7306	0.000233983	0.00721575	0.283872	FBXO7	protein_coding	up
ENSG00000214013.9	-0.0797917	5.60508	-3.72965	0.00023482	0.00722467	0.302584	GANC	protein_coding	down
ENSG00000073331.18	0.201688	5.46356	3.72844	0.00023589	0.00723773	0.294645	ALPK1	protein_coding	up
ENSG00000072864.15	0.123406	5.93575	3.72794	0.000236341	0.00723773	0.280469	NDE1	protein_coding	up
ENSG00000135899.17	0.158447	6.39221	3.72569	0.000238346	0.00728146	0.268784	SP110	protein_coding	up
ENSG00000173272.16	0.272112	2.23345	3.72463	0.000239302	0.00728146	0.352495	MZT2A	protein_coding	up
ENSG00000000938.13	-0.112376	9.49179	-3.7241	0.00023978	0.00728146	0.294734	FGR	protein_coding	down
ENSG00000196329.11	0.265369	4.96661	3.72351	0.00024031	0.00728146	0.307252	GIMAP5	protein_coding	up
ENSG00000165389.7	-0.157093	4.89904	-3.72304	0.00024074	0.00728146	0.316989	SPTSSA	protein_coding	down
ENSG00000040341.18	0.109061	4.71575	3.72266	0.000241079	0.00728146	0.307256	STAU2	protein_coding	up
ENSG00000110442.12	-0.127365	6.12652	-3.72108	0.000242517	0.00730817	0.267099	COMMD9	protein_coding	down
ENSG00000163001.11	0.174977	1.68498	3.71991	0.00024359	0.00732378	0.274513	CFAP36	protein_coding	up
ENSG00000135316.17	-0.0924314	6.86197	-3.71903	0.000244392	0.0073312	0.250064	SYNCRIP	protein_coding	down
ENSG00000111261.14	0.390847	1.75303	3.71729	0.000245998	0.00736264	0.267992	MANSC1	protein_coding	up
ENSG00000196663.16	0.19037	5.24022	3.7156	0.000247565	0.00739278	0.258672	TECPR2	protein_coding	up
ENSG00000169057.22	0.0911886	6.11794	3.71359	0.000249443	0.00743136	0.230548	MECP2	protein_coding	up
ENSG00000160255.18	-0.153595	10.8427	-3.71301	0.000249983	0.00743136	0.280605	ITGB2	protein_coding	down
ENSG00000203896.10	0.330822	1.66174	3.7097	0.000253109	0.00750739	0.240114	LIME1	protein_coding	up
ENSG00000205730.6	-0.169932	5.82433	-3.70789	0.000254832	0.00754155	0.232461	ITPRIPL2	protein_coding	down
ENSG00000148153.14	-0.143656	5.24529	-3.70641	0.000256257	0.00756558	0.241656	INIP	protein_coding	down
ENSG00000232593.7	0.182032	2.5734	3.70551	0.000257118	0.00756558	0.305815	KANTR	protein_coding	up
ENSG00000106266.11	-0.134825	3.55114	-3.70526	0.000257364	0.00756558	0.304617	SNX8	protein_coding	down
ENSG00000178234.13	0.101764	4.57724	3.70459	0.000258011	0.00756776	0.252332	GALNT11	protein_coding	up
ENSG00000180953.11	0.310095	2.02793	3.70311	0.000259447	0.00759299	0.269187	ST20	protein_coding	up
ENSG00000144749.13	0.262476	2.46407	3.70013	0.000262355	0.00764429	0.282002	LRIG1	protein_coding	up
ENSG00000142875.19	0.2213	5.14273	3.70013	0.000262358	0.00764429	0.214947	PRKACB	protein_coding	up
ENSG00000104731.14	0.144929	3.85875	3.69824	0.000264221	0.00768162	0.262835	KLHDC4	protein_coding	up
ENSG00000185201.16	0.345764	6.98361	3.69511	0.000267334	0.00775504	0.182434	IFITM2	protein_coding	up
ENSG00000108175.17	-0.144317	7.9407	-3.69352	0.000268926	0.00777195	0.168371	ZMIZ1	protein_coding	down
ENSG00000099991.18	0.156996	5.87822	3.69204	0.000270422	0.00777195	0.163754	CABIN1	protein_coding	up
ENSG00000198668.11	0.107745	7.86409	3.69181	0.000270646	0.00777195	0.161152	CALM1	protein_coding	up
ENSG00000197006.14	-0.126536	7.94933	-3.69176	0.000270706	0.00777195	0.166562	METTL9	protein_coding	down
ENSG00000154122.14	0.263483	4.39864	3.6916	0.000270861	0.00777195	0.219148	ANKH	protein_coding	up
ENSG00000196642.19	-0.095521	6.21838	-3.69081	0.000271666	0.00777815	0.157996	RABL6	protein_coding	down
ENSG00000173744.17	-0.157782	7.35516	-3.68976	0.000272736	0.00778933	0.149687	AGFG1	protein_coding	down
ENSG00000161970.14	-0.202299	8.51031	-3.68926	0.000273237	0.00778933	0.187271	RPL26	protein_coding	down
ENSG00000117984.14	-0.166784	9.14769	-3.68627	0.000276312	0.00786001	0.159512	CTSD	protein_coding	down
ENSG00000163464.7	0.748009	2.30485	3.68498	0.00027764	0.00788081	0.188515	CXCR1	protein_coding	up
ENSG00000137752.24	-0.111935	7.75383	-3.68083	0.000281973	0.00797182	0.130148	CASP1	protein_coding	down
ENSG00000174840.9	-0.0987144	5.54716	-3.67911	0.000283789	0.00797182	0.129717	PDE12	protein_coding	down
ENSG00000136111.13	0.174693	4.23433	3.67899	0.000283915	0.00797182	0.182755	TBC1D4	protein_coding	up
ENSG00000163644.15	0.211282	4.1926	3.67803	0.000284939	0.00797182	0.179101	PPM1K	protein_coding	up
ENSG00000082397.17	-0.223883	6.59788	-3.67768	0.00028531	0.00797182	0.128115	EPB41L3	protein_coding	down
ENSG00000156508.18	-0.121792	12.9287	-3.67759	0.000285405	0.00797182	0.19331	EEF1A1	protein_coding	down
ENSG00000135250.17	0.122598	5.99526	3.67724	0.000285769	0.00797182	0.108587	SRPK2	protein_coding	up
ENSG00000186017.14	0.214627	1.5764	3.67717	0.000285854	0.00797182	0.128188	ZNF566	protein_coding	up
ENSG00000163512.14	-0.135527	5.75894	-3.67676	0.000286282	0.00797182	0.131283	AZI2	protein_coding	down
ENSG00000204310.13	0.129575	4.83416	3.67614	0.000286951	0.00797361	0.158364	AGPAT1	protein_coding	up
ENSG00000267322.2	0.286991	2.69086	3.67342	0.000289871	0.00803784	0.205707	SNHG22	antisense	up
ENSG00000140836.17	-0.197128	6.96943	-3.6713	0.000292163	0.0080844	0.100094	ZFHX3	protein_coding	down
ENSG00000277224.2	0.282661	2.69894	3.66924	0.000294411	0.00812957	0.19282	HIST1H2BF	protein_coding	up
ENSG00000131355.14	0.392986	4.91596	3.6684	0.000295333	0.008138	0.118285	ADGRE3	protein_coding	up
ENSG00000051108.15	-0.152965	6.78986	-3.667	0.00029688	0.00816359	0.0751125	HERPUD1	protein_coding	down
ENSG00000284428.1	0.233748	2.00421	3.66495	0.000299144	0.0082038	0.133628	AC092329.4	processed_transcript	up
ENSG00000125818.18	0.17014	6.28329	3.66456	0.000299586	0.0082038	0.062848	PSMF1	protein_coding	up
ENSG00000170919.15	0.141766	3.09119	3.66186	0.0003026	0.00826074	0.169349	TPT1-AS1	processed_transcript	up
ENSG00000163161.13	-0.105621	5.12889	-3.66158	0.000302917	0.00826074	0.0818424	ERCC3	protein_coding	down
ENSG00000134815.19	0.155162	5.29553	3.65972	0.00030501	0.00830067	0.0682857	DHX34	protein_coding	up
ENSG00000167671.12	0.207079	5.63855	3.65626	0.000308954	0.0083907	0.0524036	UBXN6	protein_coding	up
ENSG00000134243.12	-0.207578	7.53544	-3.65501	0.00031039	0.00841241	0.0395581	SORT1	protein_coding	down
ENSG00000135387.21	-0.0796847	7.69332	-3.65365	0.000311956	0.00843753	0.030959	CAPRIN1	protein_coding	down
ENSG00000105374.10	0.493501	2.51087	3.65147	0.000314488	0.0084859	0.126609	NKG7	protein_coding	up
ENSG00000100439.10	0.151742	4.36339	3.65101	0.000315031	0.0084859	0.0893953	ABHD4	protein_coding	up
ENSG00000171365.17	-0.142885	4.7751	-3.64689	0.000319876	0.00859394	0.064313	CLCN5	protein_coding	down
ENSG00000150867.14	0.18457	7.3528	3.64649	0.000320344	0.00859394	0.00163697	PIP4K2A	protein_coding	up
ENSG00000165458.14	-0.110198	7.2671	-3.64287	0.00032467	0.00869233	-0.00601477	INPPL1	protein_coding	down
ENSG00000126262.4	0.415785	3.64693	3.64044	0.000327593	0.00875284	0.0832328	FFAR2	protein_coding	up
ENSG00000260917.1	0.163264	2.55912	3.63793	0.000330653	0.00881374	0.087539	AL158212.3	sense_overlapping	up
ENSG00000146731.11	-0.123425	5.97057	-3.63747	0.000331208	0.00881374	-0.000140132	CCT6A	protein_coding	down
ENSG00000137814.11	-0.110855	4.34924	-3.63612	0.000332869	0.00884013	0.0440502	HAUS2	protein_coding	down
ENSG00000122218.15	-0.114608	7.94022	-3.63467	0.000334654	0.00885773	-0.0292915	COPA	protein_coding	down
ENSG00000147202.18	-0.11603	6.32147	-3.63449	0.000334874	0.00885773	-0.0185308	DIAPH2	protein_coding	down
ENSG00000141580.16	-0.102902	6.18213	-3.63353	0.000336065	0.00887144	-0.0301709	WDR45B	protein_coding	down
ENSG00000059145.18	0.136435	4.16679	3.63201	0.000337953	0.00890349	0.0307899	UNKL	protein_coding	up
ENSG00000001461.17	0.179868	3.72342	3.63139	0.000338729	0.00890613	0.0490271	NIPAL3	protein_coding	up
ENSG00000154146.13	0.259324	5.81559	3.63004	0.000340426	0.00893297	-0.0180749	NRGN	protein_coding	up
ENSG00000163249.12	-0.177357	4.81918	-3.62904	0.000341672	0.00894787	0.00026033	CCNYL1	protein_coding	down
ENSG00000180530.11	-0.192963	7.02114	-3.62598	0.000345556	0.00903168	-0.0501842	NRIP1	protein_coding	down
ENSG00000115762.16	-0.0839747	7.39615	-3.62292	0.000349465	0.00911579	-0.0740446	PLEKHB2	protein_coding	down
ENSG00000152256.13	0.145016	4.99893	3.62176	0.000350965	0.00911953	-0.0498723	PDK1	protein_coding	up
ENSG00000135749.19	0.211905	3.83574	3.62174	0.00035099	0.00911953	0.0115871	PCNX2	protein_coding	up
ENSG00000185278.15	0.114528	6.01997	3.61933	0.000354116	0.00916335	-0.0871145	ZBTB37	protein_coding	up
ENSG00000163453.11	-0.178505	4.13308	-3.61914	0.000354365	0.00916335	0.0027568	IGFBP7	protein_coding	down
ENSG00000113140.11	0.547159	3.45847	3.6184	0.000355332	0.00916335	0.0198851	SPARC	protein_coding	up
ENSG00000109062.12	0.180332	6.32624	3.61803	0.00035582	0.00916335	-0.0958232	SLC9A3R1	protein_coding	up
ENSG00000114942.14	-0.136773	6.55331	-3.61778	0.000356148	0.00916335	-0.0620061	EEF1B2	protein_coding	down
ENSG00000172292.14	-0.117805	6.46899	-3.6172	0.000356911	0.00916512	-0.0862696	CERS6	protein_coding	down
ENSG00000279369.1	0.148135	3.36191	3.61616	0.000358276	0.00918229	0.0152451	AC046185.3	TEC	up
ENSG00000107551.21	-0.149666	7.27046	-3.61326	0.000362118	0.00926279	-0.100745	RASSF4	protein_coding	down
ENSG00000107372.13	-0.120039	8.59413	-3.61259	0.000362999	0.00926736	-0.0937407	ZFAND5	protein_coding	down
ENSG00000176595.4	-0.181997	6.06387	-3.6111	0.000364994	0.00928628	-0.0957252	KBTBD11	protein_coding	down
ENSG00000136840.19	0.314366	2.99409	3.61099	0.000365147	0.00928628	0.00720074	ST6GALNAC4	protein_coding	up
ENSG00000179526.17	0.165851	4.45129	3.6073	0.000370124	0.00939005	-0.0669612	SHARPIN	protein_coding	up
ENSG00000235437.7	0.171485	2.7684	3.60691	0.000370651	0.00939005	-0.00626161	LINC01278	processed_transcript	up
ENSG00000134440.12	-0.100484	6.4178	-3.6054	0.000372712	0.00939057	-0.115919	NARS	protein_coding	down
ENSG00000196943.14	-0.121948	6.02019	-3.60533	0.000372815	0.00939057	-0.13008	NOP9	protein_coding	down
ENSG00000255302.4	-0.134064	6.32359	-3.605	0.000373256	0.00939057	-0.112906	EID1	protein_coding	down
ENSG00000103249.18	-0.153633	6.59559	-3.60481	0.000373517	0.00939057	-0.128788	CLCN7	protein_coding	down
ENSG00000165914.15	0.323061	1.37787	3.60401	0.00037462	0.0094004	-0.157565	TTC7B	protein_coding	up
ENSG00000135966.13	-0.09535	5.20129	-3.60224	0.000377053	0.00944349	-0.107947	TGFBRAP1	protein_coding	down
ENSG00000149781.12	-0.107648	7.38936	-3.60137	0.000378265	0.00945591	-0.144259	FERMT3	protein_coding	down
ENSG00000080839.11	0.133801	3.54361	3.5999	0.000380305	0.00947685	-0.0460529	RBL1	protein_coding	up
ENSG00000148660.20	0.118386	5.55569	3.59973	0.000380539	0.00947685	-0.142577	CAMK2G	protein_coding	up
ENSG00000113916.18	0.220124	7.53164	3.59868	0.000382005	0.00949546	-0.156641	BCL6	protein_coding	up
ENSG00000092148.13	-0.105155	7.35241	-3.59577	0.000386101	0.00957924	-0.163973	HECTD1	protein_coding	down
ENSG00000101464.10	0.157686	2.25621	3.59214	0.000391268	0.00967431	-0.0690301	PIGU	protein_coding	up
ENSG00000197102.12	-0.122452	8.50101	-3.59205	0.000391399	0.00967431	-0.164947	DYNC1H1	protein_coding	down
ENSG00000105383.15	-0.14072	6.78418	-3.5897	0.000394773	0.00973946	-0.181917	CD33	protein_coding	down
ENSG00000171105.14	-0.18927	5.95696	-3.58896	0.000395838	0.0097475	-0.155618	INSR	protein_coding	down
ENSG00000197857.13	0.148606	3.1522	3.58817	0.000396993	0.00975775	-0.0689757	ZNF44	protein_coding	up
ENSG00000090013.10	0.202123	5.64713	3.58735	0.000398184	0.00976883	-0.171563	BLVRB	protein_coding	up
ENSG00000114861.20	0.102288	7.216	3.58668	0.000399154	0.00977446	-0.200429	FOXP1	protein_coding	up
ENSG00000105223.20	-0.159006	7.18017	-3.58406	0.000402991	0.00985014	-0.200393	PLD3	protein_coding	down
ENSG00000197386.12	-0.133109	7.14721	-3.58349	0.000403836	0.00985256	-0.208776	HTT	protein_coding	down
ENSG00000143774.16	0.189662	6.28718	3.58167	0.000406526	0.00989989	-0.20843	GUK1	protein_coding	up
ENSG00000122359.18	0.134871	7.07826	3.57791	0.000412138	0.0100181	-0.228067	ANXA11	protein_coding	up
ENSG00000164327.13	0.114701	6.70552	3.57575	0.000415399	0.0100665	-0.238022	RICTOR	protein_coding	up
ENSG00000207008.1	0.719833	-0.224994	3.57558	0.000415656	0.0100665	-0.627261	SNORA54	snoRNA	up
ENSG00000074370.18	0.166042	5.87904	3.57203	0.000421059	0.0101787	-0.235683	ATP2A3	protein_coding	up
ENSG00000136826.15	-0.205786	8.05193	-3.57108	0.000422528	0.0101955	-0.220774	KLF4	protein_coding	down
ENSG00000149564.12	0.401333	1.25199	3.57006	0.000424086	0.0102099	-0.262507	ESAM	protein_coding	up
ENSG00000165732.13	-0.132644	6.8703	-3.56968	0.000424673	0.0102099	-0.241052	DDX21	protein_coding	down
ENSG00000164054.15	0.144305	7.13763	3.56889	0.000425904	0.0102209	-0.258076	SHISA5	protein_coding	up
ENSG00000180773.15	-0.160233	5.66476	-3.56616	0.00043015	0.0103041	-0.239257	SLC36A4	protein_coding	down
ENSG00000048028.11	0.103365	4.19602	3.56399	0.000433561	0.010367	-0.193536	USP28	protein_coding	up
ENSG00000166579.15	0.159721	6.02965	3.56294	0.000435215	0.0103877	-0.27606	NDEL1	protein_coding	up
ENSG00000083812.12	0.126755	3.97087	3.56211	0.000436531	0.0104003	-0.188256	ZNF324	protein_coding	up
ENSG00000181638.18	0.179128	2.49552	3.56081	0.000438606	0.0104166	-0.155073	ZFP41	protein_coding	up
ENSG00000120137.7	-0.086454	7.02393	-3.56049	0.000439117	0.0104166	-0.280824	PANK3	protein_coding	down
ENSG00000162664.17	-0.10895	5.05011	-3.56019	0.000439581	0.0104166	-0.240979	ZNF326	protein_coding	down
ENSG00000141084.11	0.190135	4.60292	3.55733	0.000444182	0.0104967	-0.232682	RANBP10	protein_coding	up
ENSG00000067225.18	-0.160215	9.07059	-3.5571	0.000444554	0.0104967	-0.270472	PKM	protein_coding	down
ENSG00000176903.4	0.243033	2.62532	3.556	0.000446321	0.0105078	-0.166361	PNMA1	protein_coding	up
ENSG00000107036.12	-0.110638	7.1524	-3.55582	0.000446614	0.0105078	-0.294972	RIC1	protein_coding	down
ENSG00000121774.18	-0.107951	6.78221	-3.55443	0.000448875	0.0105249	-0.297924	KHDRBS1	protein_coding	down
ENSG00000123473.15	0.254423	2.94489	3.55439	0.000448936	0.0105249	-0.171765	STIL	protein_coding	up
ENSG00000171867.16	-0.102892	6.68178	-3.5514	0.000453839	0.010621	-0.302723	PRNP	protein_coding	down
ENSG00000136813.14	-0.106809	6.75096	-3.54982	0.000456434	0.0106605	-0.311523	ECPAS	protein_coding	down
ENSG00000140968.11	-0.140621	6.96483	-3.5494	0.000457142	0.0106605	-0.306928	IRF8	protein_coding	down
ENSG00000168036.18	-0.10598	7.7056	-3.54604	0.000462725	0.0107716	-0.324456	CTNNB1	protein_coding	down
ENSG00000102710.20	0.102243	5.76499	3.54311	0.000467673	0.0108676	-0.332854	SUPT20H	protein_coding	up
ENSG00000113163.16	-0.0987639	7.17407	-3.54195	0.000469633	0.010894	-0.344609	COL4A3BP	protein_coding	down
ENSG00000124766.6	-0.23416	5.99531	-3.54085	0.000471501	0.0108961	-0.309768	SOX4	protein_coding	down
ENSG00000160310.18	0.134529	5.81068	3.5406	0.000471934	0.0108961	-0.34206	PRMT2	protein_coding	up
ENSG00000133392.18	0.219051	2.928	3.53955	0.00047372	0.0108961	-0.217502	MYH11	protein_coding	up
ENSG00000161642.17	-0.167011	7.44386	-3.5395	0.00047381	0.0108961	-0.337942	ZNF385A	protein_coding	down
ENSG00000114737.15	0.228653	3.75658	3.5394	0.000473989	0.0108961	-0.245239	CISH	protein_coding	up
ENSG00000105701.16	0.279133	7.25094	3.53888	0.000474881	0.0108961	-0.352125	FKBP8	protein_coding	up
ENSG00000125534.10	0.241242	5.29506	3.53851	0.000475502	0.0108961	-0.291728	PPDPF	protein_coding	up
ENSG00000111671.9	-0.180623	2.66715	-3.53441	0.000482606	0.0110397	-0.233913	SPSB2	protein_coding	down
ENSG00000124193.15	-0.0773867	7.48233	-3.53235	0.000486215	0.0111015	-0.37034	SRSF6	protein_coding	down
ENSG00000154217.15	0.0945054	5.2822	3.53138	0.000487912	0.0111015	-0.356337	PITPNC1	protein_coding	up
ENSG00000148229.13	-0.102789	5.64646	-3.53102	0.000488551	0.0111015	-0.356584	POLE3	protein_coding	down
ENSG00000110880.10	-0.103196	7.41953	-3.53068	0.000489156	0.0111015	-0.376402	CORO1C	protein_coding	down
ENSG00000108244.16	0.525232	1.93166	3.53047	0.000489514	0.0111015	-0.270035	KRT23	protein_coding	up
ENSG00000142937.12	-0.11607	8.6858	-3.52857	0.000492878	0.0111587	-0.364892	RPS8	protein_coding	down
ENSG00000142185.16	-0.159703	5.02623	-3.52808	0.000493756	0.0111594	-0.333244	TRPM2	protein_coding	down
ENSG00000182196.13	-0.112822	4.4987	-3.52698	0.000495721	0.0111846	-0.287641	ARL6IP4	protein_coding	down
ENSG00000066926.11	0.290067	4.44638	3.52312	0.000502671	0.0113221	-0.339921	FECH	protein_coding	up
ENSG00000132879.14	0.174724	2.27115	3.52248	0.000503821	0.0113287	-0.283516	FBXO44	protein_coding	up
ENSG00000128340.15	0.110349	8.14912	3.52153	0.000505541	0.011348	-0.400339	RAC2	protein_coding	up
ENSG00000146416.18	0.207728	2.06619	3.51791	0.00051217	0.0114711	-0.307099	AIG1	protein_coding	up
ENSG00000100364.18	-0.15232	7.22529	-3.51731	0.000513291	0.0114711	-0.415376	KIAA0930	protein_coding	down
ENSG00000119471.15	0.158542	4.89365	3.51705	0.000513759	0.0114711	-0.381477	HSDL2	protein_coding	up
ENSG00000136044.12	0.110518	4.19107	3.51665	0.000514501	0.0114711	-0.349902	APPL2	protein_coding	up
ENSG00000142864.14	-0.0822059	7.27544	-3.51498	0.000517609	0.0115209	-0.425257	SERBP1	protein_coding	down
ENSG00000059728.11	0.240311	7.8439	3.51409	0.000519255	0.0115381	-0.430872	MXD1	protein_coding	up
ENSG00000109475.16	-0.189898	7.85204	-3.51273	0.000521804	0.0115716	-0.408917	RPL34	protein_coding	down
ENSG00000270882.2	0.269409	4.47684	3.51186	0.000523438	0.0115716	-0.373546	HIST2H4A	protein_coding	up
ENSG00000120306.11	0.197447	3.28919	3.51172	0.0005237	0.0115716	-0.313868	CYSTM1	protein_coding	up
ENSG00000042493.16	-0.167646	6.56029	-3.51142	0.000524267	0.0115716	-0.416387	CAPG	protein_coding	down
ENSG00000257027.1	0.18518	4.16064	3.51086	0.000525319	0.0115754	-0.366566	AC010186.3	sense_intronic	up
ENSG00000185885.16	0.524169	2.70416	3.50724	0.000532189	0.0117073	-0.31705	IFITM1	protein_coding	up
ENSG00000060749.15	-0.122862	6.7067	-3.50597	0.000534621	0.0117079	-0.457545	QSER1	protein_coding	down
ENSG00000165410.14	-0.23296	3.52483	-3.50583	0.000534902	0.0117079	-0.335203	CFL2	protein_coding	down
ENSG00000143952.20	-0.0935365	5.35919	-3.50549	0.000535546	0.0117079	-0.425179	VPS54	protein_coding	down
ENSG00000108883.13	-0.0995947	6.81172	-3.50494	0.000536611	0.0117079	-0.459347	EFTUD2	protein_coding	down
ENSG00000072756.17	0.0918042	4.00554	3.50492	0.000536651	0.0117079	-0.374927	TRNT1	protein_coding	up
ENSG00000108784.10	-0.109484	4.03684	-3.50245	0.000541428	0.0117926	-0.370903	NAGLU	protein_coding	down
ENSG00000165714.11	0.140394	3.59619	3.50089	0.00054446	0.0118321	-0.36489	BORCS5	protein_coding	up
ENSG00000089351.14	0.142864	5.45652	3.50059	0.000545036	0.0118321	-0.451758	GRAMD1A	protein_coding	up
ENSG00000183597.15	0.129912	5.5691	3.4996	0.000546988	0.011855	-0.468523	TANGO2	protein_coding	up
ENSG00000100003.18	0.202852	1.30318	3.49913	0.000547895	0.0118552	-0.451858	SEC14L2	protein_coding	up
ENSG00000177731.16	-0.0943814	7.77277	-3.4984	0.000549344	0.0118671	-0.478623	FLII	protein_coding	down
ENSG00000196924.16	-0.125929	11.1906	-3.49787	0.000550378	0.01187	-0.421654	FLNA	protein_coding	down
ENSG00000160193.11	0.156587	1.92897	3.49616	0.000553763	0.0119235	-0.380576	WDR4	protein_coding	up
ENSG00000279415.1	0.309675	0.227021	3.49304	0.000559985	0.0120031	-0.677252	AC099494.2	TEC	up
ENSG00000105483.18	0.154659	7.08578	3.49302	0.00056002	0.0120031	-0.505075	CARD8	protein_coding	up
ENSG00000175470.20	0.0909775	5.12384	3.49225	0.000561559	0.0120031	-0.476613	PPP2R2D	protein_coding	up
ENSG00000075945.13	0.174502	2.90031	3.49213	0.000561811	0.0120031	-0.366926	KIFAP3	protein_coding	up
ENSG00000160695.14	-0.0857206	5.63136	-3.49203	0.000562008	0.0120031	-0.484846	VPS11	protein_coding	down
ENSG00000185420.19	0.174779	1.4732	3.4877	0.000570782	0.0121708	-0.454929	SMYD3	protein_coding	up
ENSG00000155508.13	-0.11022	6.92089	-3.48678	0.000572659	0.012181	-0.520339	CNOT8	protein_coding	down
ENSG00000005249.13	0.312007	4.7643	3.48656	0.000573103	0.012181	-0.476181	PRKAR2B	protein_coding	up
ENSG00000183354.12	0.0774983	6.26263	3.4856	0.000575062	0.012203	-0.527131	KIAA2026	protein_coding	up
ENSG00000131473.17	-0.0897897	6.79479	-3.48269	0.000581072	0.0122994	-0.52846	ACLY	protein_coding	down
ENSG00000083720.13	0.224436	1.95187	3.48228	0.000581931	0.0122994	-0.416753	OXCT1	protein_coding	up
ENSG00000117155.16	0.202872	2.48636	3.48189	0.000582728	0.0122994	-0.395683	SSX2IP	protein_coding	up
ENSG00000165092.13	-0.253406	5.91839	-3.4816	0.000583332	0.0122994	-0.493128	ALDH1A1	protein_coding	down
ENSG00000162711.17	-0.173386	7.00168	-3.48027	0.000586113	0.0123383	-0.522275	NLRP3	protein_coding	down
ENSG00000008441.16	0.231196	4.35895	3.47958	0.000587552	0.0123489	-0.462972	NFIX	protein_coding	up
ENSG00000110048.12	-0.113315	5.82726	-3.4788	0.0005892	0.0123638	-0.532848	OSBP	protein_coding	down
ENSG00000163328.13	0.191344	5.09694	3.47795	0.000590984	0.0123816	-0.522592	GPR155	protein_coding	up
ENSG00000081059.20	0.404734	3.85646	3.47746	0.000592019	0.0123836	-0.441991	TCF7	protein_coding	up
ENSG00000111913.18	0.196366	8.44183	3.47422	0.000598898	0.0125077	-0.54426	RIPOR2	protein_coding	up
ENSG00000237593.1	0.360538	-0.672187	3.47342	0.000600601	0.012514	-1.02152	AL445220.1	processed_pseudogene	up
ENSG00000008226.19	0.159422	2.67292	3.47292	0.000601675	0.012514	-0.422334	DLEC1	protein_coding	up
ENSG00000104331.9	-0.111868	6.52756	-3.47275	0.000602047	0.012514	-0.56079	IMPAD1	protein_coding	down
ENSG00000074964.17	-0.143864	6.15357	-3.47048	0.000606934	0.0125958	-0.550329	ARHGEF10L	protein_coding	down
ENSG00000203618.5	0.806508	1.24385	3.47002	0.000607913	0.0125963	-0.535128	GP1BB	protein_coding	up
ENSG00000162441.12	-0.0895187	5.18974	-3.46914	0.000609826	0.0126006	-0.539393	LZIC	protein_coding	down
ENSG00000134108.13	-0.124397	6.59237	-3.46834	0.000611556	0.0126006	-0.576532	ARL8B	protein_coding	down
ENSG00000114013.16	-0.183099	6.86634	-3.46794	0.000612443	0.0126006	-0.559813	CD86	protein_coding	down
ENSG00000085760.14	-0.116763	3.74754	-3.46785	0.000612622	0.0126006	-0.461175	MTIF2	protein_coding	down
ENSG00000143363.17	0.145927	3.78808	3.46773	0.000612892	0.0126006	-0.476405	PRUNE1	protein_coding	up
ENSG00000198853.12	-0.202207	5.08594	-3.46443	0.000620129	0.0127295	-0.534481	RUSC2	protein_coding	down
ENSG00000107438.9	0.473518	1.50435	3.4621	0.000625285	0.0128154	-0.536695	PDLIM1	protein_coding	up
ENSG00000233559.1	0.26228	1.38765	3.46091	0.000627927	0.0128321	-0.542185	LINC00513	lincRNA	up
ENSG00000092964.18	-0.140606	7.98416	-3.46079	0.000628189	0.0128321	-0.589852	DPYSL2	protein_coding	down
ENSG00000166900.17	0.143284	5.88886	3.46042	0.000629017	0.0128321	-0.605983	STX3	protein_coding	up
ENSG00000146083.12	0.110449	6.8175	3.45929	0.000631541	0.0128638	-0.594585	RNF44	protein_coding	up
ENSG00000085491.17	-0.128301	5.90088	-3.45753	0.000635519	0.0129248	-0.584533	SLC25A24	protein_coding	down
ENSG00000182199.11	-0.0994148	5.23078	-3.45279	0.000646275	0.0131234	-0.592299	SHMT2	protein_coding	down
ENSG00000029639.11	0.173247	1.76517	3.45056	0.000651402	0.0132071	-0.525799	TFB1M	protein_coding	up
ENSG00000086598.11	-0.100961	7.26732	-3.44872	0.000655678	0.0132735	-0.639103	TMED2	protein_coding	down
ENSG00000113269.14	-0.100374	8.2918	-3.44795	0.000657457	0.0132891	-0.635087	RNF130	protein_coding	down
ENSG00000022840.16	0.178666	7.30134	3.4473	0.000658967	0.0132924	-0.652176	RNF10	protein_coding	up
ENSG00000166669.13	0.166256	3.24538	3.44702	0.000659633	0.0132924	-0.51759	ATF7IP2	protein_coding	up
ENSG00000108344.15	-0.0919882	5.42735	-3.44651	0.000660832	0.0132962	-0.618907	PSMD3	protein_coding	down
ENSG00000124406.16	0.115376	5.6387	3.44455	0.000665432	0.0133684	-0.644764	ATP8A1	protein_coding	up
ENSG00000232119.8	0.0993211	4.53946	3.44324	0.000668507	0.0134098	-0.604799	MCTS1	protein_coding	up
ENSG00000155393.13	-0.162802	4.91814	-3.44256	0.000670118	0.0134131	-0.597027	HEATR3	protein_coding	down
ENSG00000154059.11	-0.0932181	4.74591	-3.44209	0.000671228	0.0134131	-0.595502	IMPACT	protein_coding	down
ENSG00000115241.11	-0.0766886	5.49548	-3.44189	0.000671721	0.0134131	-0.630334	PPM1G	protein_coding	down
ENSG00000089009.15	-0.0959657	8.7138	-3.44121	0.000673342	0.0134251	-0.643168	RPL6	protein_coding	down
ENSG00000172765.17	0.142461	5.00342	3.43686	0.000683749	0.0135925	-0.648068	TMCC1	protein_coding	up
ENSG00000111817.17	-0.15811	6.49463	-3.43684	0.000683798	0.0135925	-0.672997	DSE	protein_coding	down
ENSG00000133142.17	-0.174027	2.11942	-3.43218	0.000695159	0.0137853	-0.559725	TCEAL4	protein_coding	down
ENSG00000125844.15	-0.130573	5.73093	-3.432	0.000695584	0.0137853	-0.668952	RRBP1	protein_coding	down
ENSG00000172575.12	0.339598	2.37413	3.43133	0.000697246	0.0137891	-0.54957	RASGRP1	protein_coding	up
ENSG00000111669.15	-0.0733131	7.46824	-3.43105	0.000697929	0.0137891	-0.694268	TPI1	protein_coding	down
ENSG00000105926.15	0.196439	2.33189	3.43065	0.000698908	0.0137891	-0.55198	MPP6	protein_coding	up
ENSG00000067560.11	-0.11861	9.59746	-3.42886	0.000703331	0.0138556	-0.672269	RHOA	protein_coding	down
ENSG00000123349.14	-0.153924	6.90322	-3.4277	0.000706209	0.0138916	-0.679003	PFDN5	protein_coding	down
ENSG00000197457.10	0.24584	2.40562	3.42544	0.000711864	0.013982	-0.566707	STMN3	protein_coding	up
ENSG00000104447.12	-0.118015	7.0141	-3.42483	0.0007134	0.0139913	-0.708712	TRPS1	protein_coding	down
ENSG00000011523.14	0.107982	5.00766	3.42412	0.000715174	0.0140053	-0.688865	CEP68	protein_coding	up
ENSG00000168385.18	-0.107283	7.92264	-3.42033	0.000724782	0.0141542	-0.72566	2025-09-02	protein_coding	down
ENSG00000196504.16	-0.0710627	7.03429	-3.42028	0.00072492	0.0141542	-0.731469	PRPF40A	protein_coding	down
ENSG00000170396.8	-0.155223	3.14703	-3.41874	0.000728859	0.0142101	-0.592916	ZNF804A	protein_coding	down
ENSG00000065559.15	0.12292	5.19949	3.41766	0.000731625	0.0142342	-0.71354	MAP2K4	protein_coding	up
ENSG00000060491.16	-0.093356	6.81419	-3.41742	0.000732256	0.0142342	-0.733018	OGFR	protein_coding	down
ENSG00000123064.12	-0.0966238	5.32094	-3.41576	0.000736537	0.0142964	-0.70953	DDX54	protein_coding	down
ENSG00000103342.13	0.194508	6.43668	3.41179	0.000746879	0.0144758	-0.764911	GSPT1	protein_coding	up
ENSG00000093072.17	-0.138882	9.53271	-3.41011	0.000751286	0.0145399	-0.732566	ADA2	protein_coding	down
ENSG00000118007.13	0.0768174	5.63418	3.40947	0.000752994	0.0145516	-0.751035	STAG1	protein_coding	up
ENSG00000205269.6	-0.184792	8.04349	-3.40835	0.000755947	0.0145873	-0.757231	TMEM170B	protein_coding	down
ENSG00000161911.11	0.694323	0.55638	3.40769	0.000757713	0.0146001	-0.851107	TREML1	protein_coding	up
ENSG00000125691.13	-0.104726	7.66392	-3.40531	0.000764066	0.0146711	-0.747937	RPL23	protein_coding	down
ENSG00000151065.14	0.15625	2.35897	3.40492	0.000765107	0.0146711	-0.630399	DCP1B	protein_coding	up
ENSG00000254469.7	0.24828	0.180561	3.4045	0.000766237	0.0146711	-0.962603	AP002495.2	protein_coding	up
ENSG00000228242.6	0.19519	3.18607	3.40429	0.000766802	0.0146711	-0.644075	AC093495.1	antisense	up
ENSG00000136286.16	-0.10378	8.3891	-3.40402	0.000767518	0.0146711	-0.772415	MYO1G	protein_coding	down
ENSG00000163788.14	0.0744658	7.15475	3.40381	0.00076807	0.0146711	-0.790423	SNRK	protein_coding	up
ENSG00000055163.20	0.186811	6.38389	3.40199	0.000773006	0.0147441	-0.796288	CYFIP2	protein_coding	up
ENSG00000183963.18	-0.170809	2.18459	-3.40157	0.000774147	0.0147445	-0.652998	SMTN	protein_coding	down
ENSG00000169957.10	-0.119962	3.93762	-3.40043	0.000777228	0.0147782	-0.687286	ZNF768	protein_coding	down
ENSG00000006530.17	0.11528	3.80296	3.40009	0.000778153	0.0147782	-0.692206	AGK	protein_coding	up
ENSG00000217555.12	0.137233	4.97603	3.39819	0.000783362	0.0148557	-0.757956	CKLF	protein_coding	up
ENSG00000086232.13	0.133794	6.38136	3.39713	0.000786271	0.0148895	-0.813216	EIF2AK1	protein_coding	up
ENSG00000103121.8	0.125938	3.26846	3.39588	0.000789706	0.0149115	-0.674075	CMC2	protein_coding	up
ENSG00000100360.15	0.136876	3.30482	3.39558	0.000790551	0.0149115	-0.67774	IFT27	protein_coding	up
ENSG00000151576.10	-0.118199	5.09481	-3.39548	0.000790823	0.0149115	-0.767029	QTRT2	protein_coding	down
ENSG00000264772.6	-0.205456	4.65826	-3.39217	0.000800018	0.0150634	-0.748793	AC016876.2	processed_transcript	down
ENSG00000090661.12	0.359331	2.89484	3.39114	0.000802912	0.0150963	-0.674436	CERS4	protein_coding	up
ENSG00000140543.14	0.152066	2.52669	3.39048	0.00080477	0.0151098	-0.669938	DET1	protein_coding	up
ENSG00000138434.17	-0.0909562	7.40439	-3.39	0.000806115	0.0151127	-0.829206	ITPRID2	protein_coding	down
ENSG00000173757.9	0.117133	7.41174	3.38961	0.000807216	0.0151127	-0.835014	STAT5B	protein_coding	up
ENSG00000170142.11	-0.0963167	5.69407	-3.38811	0.000811463	0.0151456	-0.803594	UBE2E1	protein_coding	down
ENSG00000167850.3	-0.170594	5.00477	-3.38793	0.000811967	0.0151456	-0.77072	CD300C	protein_coding	down
ENSG00000265148.5	0.246133	3.39129	3.38754	0.000813067	0.0151456	-0.707032	TSPOAP1-AS1	antisense	up
ENSG00000117592.9	0.170314	6.27561	3.38737	0.000813563	0.0151456	-0.841425	PRDX6	protein_coding	up
ENSG00000144036.15	0.130344	3.69792	3.3859	0.000817746	0.015202	-0.727835	EXOC6B	protein_coding	up
ENSG00000273247.5	0.175921	2.81307	3.38308	0.000825819	0.0153305	-0.695779	AC097376.2	antisense	up
ENSG00000129084.17	-0.0860908	6.06904	-3.38266	0.00082703	0.0153314	-0.836243	PSMA1	protein_coding	down
ENSG00000138785.15	-0.0986183	3.30939	-3.38171	0.000829769	0.0153606	-0.712517	INTS12	protein_coding	down
ENSG00000173660.12	-0.110679	4.93988	-3.3778	0.000841165	0.0155377	-0.782563	UQCRH	protein_coding	down
ENSG00000100578.15	0.123084	4.31713	3.37752	0.000841983	0.0155377	-0.79435	KIAA0586	protein_coding	up
ENSG00000164951.16	-0.126915	6.57049	-3.37687	0.000843897	0.0155377	-0.858311	PDP1	protein_coding	down
ENSG00000141959.17	-0.103592	6.81714	-3.37682	0.000844044	0.0155377	-0.863522	PFKL	protein_coding	down
ENSG00000196072.12	-0.115009	4.95753	-3.37566	0.000847452	0.0155622	-0.808601	BLOC1S2	protein_coding	down
ENSG00000114999.8	-0.0816369	5.49823	-3.37557	0.000847733	0.0155622	-0.846338	TTL	protein_coding	down
ENSG00000198574.6	0.510139	1.50252	3.37472	0.00085023	0.0155864	-0.767988	SH2D1B	protein_coding	up
ENSG00000100100.12	0.153385	5.60137	3.37272	0.00085617	0.0156735	-0.873616	PIK3IP1	protein_coding	up
ENSG00000102796.11	0.197182	2.90228	3.37177	0.000859002	0.0156861	-0.731319	DHRS12	protein_coding	up
ENSG00000143376.14	-0.077908	7.93048	-3.37161	0.000859483	0.0156861	-0.883882	SNX27	protein_coding	down
ENSG00000188994.13	0.103311	6.5157	3.3713	0.000860427	0.0156861	-0.89431	ZNF292	protein_coding	up
ENSG00000135976.19	0.199849	3.66634	3.37081	0.000861896	0.0156913	-0.775599	ANKRD36	protein_coding	up
ENSG00000274487.2	0.172268	2.9816	3.37019	0.000863741	0.0157032	-0.738436	AC244154.1	transcribed_unprocessed_pseudogene	up
ENSG00000114450.10	-0.0989771	7.28394	-3.36919	0.000866738	0.015736	-0.889235	GNB4	protein_coding	down
ENSG00000185973.11	0.0903127	4.83254	3.36823	0.000869664	0.0157674	-0.851784	TMLHE	protein_coding	up
ENSG00000129255.16	-0.100659	4.93788	-3.36779	0.000870976	0.0157696	-0.845372	MPDU1	protein_coding	down
ENSG00000196912.12	0.241459	2.86634	3.36696	0.000873491	0.0157934	-0.747309	ANKRD36B	protein_coding	up
ENSG00000143545.8	-0.351588	1.06747	-3.36576	0.00087715	0.015836	-0.865586	RAB13	protein_coding	down
ENSG00000118705.17	-0.0988269	7.01701	-3.3654	0.000878242	0.015836	-0.902592	RPN2	protein_coding	down
ENSG00000110077.14	-0.132327	8.6613	-3.36432	0.00088153	0.0158505	-0.884404	MS4A6A	protein_coding	down
ENSG00000122507.20	0.135374	3.19701	3.36419	0.000881949	0.0158505	-0.766739	BBS9	protein_coding	up
ENSG00000130921.7	0.132955	2.48188	3.36396	0.000882654	0.0158505	-0.748268	C12orf65	protein_coding	up
ENSG00000150540.14	-0.174567	5.07751	-3.36179	0.000889333	0.0159263	-0.838843	HNMT	protein_coding	down
ENSG00000230989.6	-0.123392	6.24904	-3.36153	0.000890132	0.0159263	-0.899878	HSBP1	protein_coding	down
ENSG00000101191.16	0.0752379	6.38436	3.36141	0.000890493	0.0159263	-0.924679	DIDO1	protein_coding	up
ENSG00000250011.1	0.453507	-0.142378	3.35803	0.000901005	0.0160925	-1.11823	HMGB1P3	processed_pseudogene	up
ENSG00000168264.10	-0.144211	8.47703	-3.35587	0.000907767	0.0161914	-0.921015	IRF2BP2	protein_coding	down
ENSG00000273245.1	0.276451	-0.559854	3.35469	0.000911479	0.0162234	-1.35	AC092653.1	lincRNA	up
ENSG00000162636.16	-0.114505	5.93265	-3.35452	0.000912019	0.0162234	-0.922512	FAM102B	protein_coding	down
ENSG00000124333.16	-0.0980287	5.02617	-3.35343	0.000915479	0.0162411	-0.889276	VAMP7	protein_coding	down
ENSG00000170088.14	-0.113958	4.47705	-3.35265	0.000917971	0.0162635	-0.865867	TMEM192	protein_coding	down
ENSG00000178971.15	0.150392	5.0253	3.35119	0.000922598	0.0162838	-0.909034	CTC1	protein_coding	up
ENSG00000134697.13	-0.0906522	4.84223	-3.35093	0.000923452	0.0162838	-0.88293	GNL2	protein_coding	down
ENSG00000134954.14	0.546902	3.81923	3.35087	0.000923638	0.0162838	-0.835403	ETS1	protein_coding	up
ENSG00000271614.1	-0.241636	5.93661	-3.35074	0.00092405	0.0162838	-0.90531	ATP2B1-AS1	lincRNA	down
ENSG00000273311.1	0.152787	2.40345	3.3492	0.000928976	0.0163487	-0.792037	DGCR11	sense_intronic	up
ENSG00000169609.14	0.118738	3.68841	3.34802	0.000932775	0.0163578	-0.846144	C15orf40	protein_coding	up
ENSG00000220323.4	0.199437	3.1859	3.34786	0.000933302	0.0163578	-0.814793	HIST2H2BD	transcribed_unprocessed_pseudogene	up
ENSG00000064726.9	-0.0734481	6.05133	-3.34734	0.00093498	0.0163578	-0.945117	BTBD1	protein_coding	down
ENSG00000254986.7	-0.116708	4.09029	-3.34711	0.000935727	0.0163578	-0.855869	DPP3	protein_coding	down
ENSG00000124313.15	-0.16721	5.01782	-3.34688	0.000936484	0.0163578	-0.896278	IQSEC2	protein_coding	down
ENSG00000122783.16	0.12331	4.91952	3.34674	0.000936925	0.0163578	-0.926523	CYREN	protein_coding	up
ENSG00000131652.14	-0.102287	3.60422	-3.34591	0.000939615	0.0163815	-0.831482	THOC6	protein_coding	down
ENSG00000068697.7	-0.0935689	6.52695	-3.34503	0.000942471	0.0163815	-0.961111	LAPTM4A	protein_coding	down
ENSG00000128595.17	-0.0822793	5.6552	-3.34485	0.000943068	0.0163815	-0.942581	CALU	protein_coding	down
ENSG00000163219.11	0.143203	6.14757	3.34432	0.000944803	0.0163815	-0.970885	ARHGAP25	protein_coding	up
ENSG00000100528.12	-0.110769	5.52022	-3.34424	0.000945066	0.0163815	-0.938426	CNIH1	protein_coding	down
ENSG00000231721.7	0.154889	4.9621	3.34365	0.000946993	0.0163815	-0.936716	LINC-PINT	processed_transcript	up
ENSG00000254477.2	0.232538	0.491602	3.3436	0.000947152	0.0163815	-1.05209	AP000640.1	processed_transcript	up
ENSG00000137166.14	-0.168042	4.12577	-3.34328	0.000948213	0.0163815	-0.850665	FOXP4	protein_coding	down
ENSG00000140443.14	0.245961	5.3387	3.34237	0.000951171	0.0164084	-0.954734	IGF1R	protein_coding	up
ENSG00000198648.11	0.172665	3.74181	3.34204	0.000952259	0.0164084	-0.866146	STK39	protein_coding	up
ENSG00000169084.13	0.153669	3.14952	3.34099	0.000955739	0.0164255	-0.833347	DHRSX	protein_coding	up
ENSG00000163214.21	-0.131463	5.64048	-3.3361	0.00097201	0.0166421	-0.967563	DHX57	protein_coding	down
ENSG00000158669.11	-0.107163	5.67714	-3.33598	0.000972405	0.0166421	-0.968899	GPAT4	protein_coding	down
ENSG00000007237.18	-0.159889	8.7472	-3.33589	0.00097272	0.0166421	-0.981035	GAS7	protein_coding	down
ENSG00000173905.8	-0.128124	3.90326	-3.33569	0.000973385	0.0166421	-0.869722	GOLIM4	protein_coding	down
ENSG00000166946.14	0.0827817	6.3969	3.3341	0.000978721	0.016701	-1.00715	CCNDBP1	protein_coding	up
ENSG00000108091.11	-0.120222	6.54291	-3.33391	0.000979361	0.016701	-0.996624	CCDC6	protein_coding	down
ENSG00000100292.17	-0.169775	6.91747	-3.33224	0.000985027	0.016776	-0.998721	HMOX1	protein_coding	down
ENSG00000079308.19	0.409746	4.23347	3.33091	0.000989559	0.0168071	-0.90375	TNS1	protein_coding	up
ENSG00000009307.16	-0.0638362	8.89128	-3.33089	0.000989617	0.0168071	-0.989878	CSDE1	protein_coding	down
ENSG00000102921.8	0.0830072	6.32927	3.33058	0.000990676	0.0168071	-1.02125	AC026470.1	protein_coding	up
ENSG00000081665.14	0.152484	4.47073	3.32972	0.000993625	0.0168355	-0.952901	ZNF506	protein_coding	up
ENSG00000131504.17	-0.101793	8.16767	-3.32923	0.000995297	0.0168422	-1.01187	DIAPH1	protein_coding	down
ENSG00000162924.14	-0.112922	7.94075	-3.32807	0.000999286	0.016867	-1.01827	REL	protein_coding	down
ENSG00000187735.14	-0.0624693	6.03725	-3.32793	0.000999772	0.016867	-1.00209	TCEA1	protein_coding	down
ENSG00000065491.8	0.161462	3.30301	3.32729	0.00100196	0.016867	-0.877621	TBC1D22B	protein_coding	up
ENSG00000100201.21	0.097452	9.64495	3.32721	0.00100224	0.016867	-0.98678	DDX17	protein_coding	up
ENSG00000206562.11	0.120944	2.16777	3.32659	0.00100439	0.016867	-0.859821	METTL6	protein_coding	up
ENSG00000106665.15	-0.147718	5.00488	-3.32658	0.00100443	0.016867	-0.969681	CLIP2	protein_coding	down
ENSG00000179104.9	-0.124012	5.21553	-3.32609	0.0010061	0.0168735	-0.982188	TMTC2	protein_coding	down
ENSG00000186501.14	0.138181	3.66846	3.32439	0.00101201	0.0169511	-0.911424	TMEM222	protein_coding	up
ENSG00000084207.16	-0.11985	7.1938	-3.32234	0.00101919	0.0170362	-1.0184	GSTP1	protein_coding	down
ENSG00000165156.15	-0.0923529	5.17231	-3.3222	0.00101967	0.0170362	-0.993893	ZHX1	protein_coding	down
ENSG00000107201.10	0.189933	5.18713	3.32134	0.00102268	0.017065	-1.00529	DDX58	protein_coding	up
ENSG00000144559.10	0.173632	2.57118	3.31954	0.00102904	0.0171466	-0.878607	TAMM41	protein_coding	up
ENSG00000118200.14	-0.212048	3.55051	-3.31922	0.00103017	0.0171466	-0.911247	CAMSAP2	protein_coding	down
ENSG00000224397.6	0.203498	5.7288	3.31874	0.00103186	0.0171531	-1.02072	SMIM25	lincRNA	up
ENSG00000169919.17	-0.146742	5.68165	-3.31795	0.00103465	0.0171638	-1.02542	GUSB	protein_coding	down
ENSG00000160710.16	0.0955452	8.81754	3.31783	0.00103511	0.0171638	-1.03576	ADAR	protein_coding	up
ENSG00000110446.11	-0.105472	7.38925	-3.31739	0.00103667	0.0171681	-1.05487	SLC15A3	protein_coding	down
ENSG00000143409.15	0.149755	4.98501	3.31618	0.00104098	0.017218	-1.02053	MINDY1	protein_coding	up
ENSG00000168300.14	0.122284	6.35397	3.31427	0.00104782	0.0173093	-1.06235	PCMTD1	protein_coding	up
ENSG00000004399.12	-0.162773	7.61517	-3.30825	0.0010697	0.0176444	-1.07374	PLXND1	protein_coding	down
ENSG00000184381.18	0.228241	1.80783	3.30795	0.00107078	0.0176444	-0.935629	PLA2G6	protein_coding	up
ENSG00000187608.9	0.342748	3.77001	3.30544	0.00108003	0.0177748	-0.964059	ISG15	protein_coding	up
ENSG00000121807.5	-0.198349	7.44084	-3.30398	0.00108544	0.0178147	-1.07765	CCR2	protein_coding	down
ENSG00000168014.16	0.110032	4.83823	3.30382	0.00108604	0.0178147	-1.0461	C2CD3	protein_coding	up
ENSG00000137817.17	-0.0867658	5.55636	-3.30369	0.00108651	0.0178147	-1.07464	PARP6	protein_coding	down
ENSG00000145833.16	-0.0842409	6.03561	-3.3022	0.00109207	0.0178663	-1.0884	DDX46	protein_coding	down
ENSG00000010256.11	-0.0893081	6.06306	-3.30212	0.00109236	0.0178663	-1.08307	UQCRC1	protein_coding	down
ENSG00000167106.12	0.343591	2.90242	3.30058	0.00109814	0.0179385	-0.938365	FAM102A	protein_coding	up
ENSG00000112739.17	-0.0774055	6.82946	-3.29987	0.0011008	0.0179597	-1.10967	PRPF4B	protein_coding	down
ENSG00000124523.15	0.101231	3.11282	3.29766	0.00110915	0.0180737	-0.960708	SIRT5	protein_coding	up
ENSG00000258610.1	-0.817792	0.0115884	-3.29612	0.00111501	0.0181467	-1.43985	AF111169.1	lincRNA	down
ENSG00000137955.16	-0.12955	5.49376	-3.29413	0.00112264	0.0182484	-1.09196	RABGGTB	protein_coding	down
ENSG00000166233.15	-0.0639723	6.80441	-3.29296	0.0011271	0.0182985	-1.1361	ARIH1	protein_coding	down
ENSG00000178199.13	0.23727	2.75129	3.29184	0.00113143	0.0183461	-0.963937	ZC3H12D	protein_coding	up
ENSG00000081154.11	-0.0925171	6.28039	-3.29066	0.00113599	0.0183974	-1.12426	PCNP	protein_coding	down
ENSG00000130830.15	0.160812	6.8176	3.2895	0.00114052	0.0184197	-1.14888	MPP1	protein_coding	up
ENSG00000175166.17	-0.0881127	6.6229	-3.28932	0.00114119	0.0184197	-1.14222	PSMD2	protein_coding	down
ENSG00000104765.16	0.140286	8.1115	3.28913	0.00114196	0.0184197	-1.13578	BNIP3L	protein_coding	up
ENSG00000182827.9	-0.0923107	5.37938	-3.28858	0.00114411	0.0184197	-1.10705	ACBD3	protein_coding	down
ENSG00000130684.14	0.121981	3.46928	3.28842	0.00114474	0.0184197	-1.00976	ZNF337	protein_coding	up
ENSG00000170946.15	0.106361	2.89508	3.28816	0.00114574	0.0184197	-0.980087	DNAJC24	protein_coding	up
ENSG00000198832.10	0.27048	0.09571	3.28742	0.00114864	0.0184309	-1.28384	SELENOM	protein_coding	up
ENSG00000116711.10	-0.184147	3.06869	-3.28727	0.00114923	0.0184309	-0.981884	PLA2G4A	protein_coding	down
ENSG00000113387.12	-0.104301	6.81228	-3.2861	0.00115382	0.0184821	-1.14031	SUB1	protein_coding	down
ENSG00000281376.1	0.357689	2.21338	3.28485	0.00115873	0.0185383	-0.980327	ABALON	antisense	up
ENSG00000274180.1	0.190707	4.70353	3.28443	0.00116041	0.0185426	-1.08427	NATD1	protein_coding	up
ENSG00000169413.3	-0.169437	6.25635	-3.28354	0.00116392	0.0185763	-1.14355	RNASE6	protein_coding	down
ENSG00000182093.15	0.16786	2.97072	3.27944	0.00118027	0.0188145	-1.00876	WRB	protein_coding	up
ENSG00000216490.4	-0.115274	9.91881	-3.27857	0.0011838	0.0188268	-1.12995	IFI30	protein_coding	down
ENSG00000203814.6	0.217185	4.82943	3.27786	0.00118664	0.0188268	-1.12899	HIST2H2BF	protein_coding	up
ENSG00000139725.8	0.128215	4.93113	3.27785	0.00118667	0.0188268	-1.12204	RHOF	protein_coding	up
ENSG00000063854.13	0.204154	3.89269	3.27783	0.00118675	0.0188268	-1.06644	HAGH	protein_coding	up
ENSG00000270681.1	-0.321914	0.876038	-3.27712	0.00118965	0.0188501	-1.15184	AC095055.1	antisense	down
ENSG00000162368.13	-0.0960316	6.67682	-3.27488	0.00119874	0.0189678	-1.17651	CMPK1	protein_coding	down
ENSG00000243716.10	0.193657	5.9859	3.27427	0.00120124	0.0189678	-1.16814	NPIPB5	protein_coding	up
ENSG00000069966.18	0.226068	2.39939	3.27423	0.00120138	0.0189678	-1.00826	GNB5	protein_coding	up
ENSG00000240065.8	0.199033	5.52502	3.27124	0.00121367	0.0190913	-1.17267	PSMB9	protein_coding	up
ENSG00000124795.16	-0.0860855	7.12643	-3.27109	0.00121426	0.0190913	-1.1874	DEK	protein_coding	down
ENSG00000109917.11	-0.0950597	5.16053	-3.271	0.00121463	0.0190913	-1.14759	ZPR1	protein_coding	down
ENSG00000259494.2	0.14811	2.22823	3.27081	0.00121544	0.0190913	-1.01851	MRPL46	protein_coding	up
ENSG00000140450.9	-0.215335	5.98471	-3.27057	0.00121644	0.0190913	-1.17032	ARRDC4	protein_coding	down
ENSG00000185800.12	0.261254	2.38199	3.26978	0.0012197	0.0191197	-1.02085	DMWD	protein_coding	up
ENSG00000170006.12	0.139861	8.25652	3.26722	0.00123035	0.0192638	-1.19956	TMEM154	protein_coding	up
ENSG00000051128.19	-0.15985	4.86362	-3.26616	0.00123475	0.0193088	-1.13183	HOMER3	protein_coding	down
ENSG00000145416.13	-0.116719	7.82354	-3.26583	0.00123615	0.0193088	-1.20071	2025-03-01	protein_coding	down
ENSG00000147526.20	-0.0694515	7.93754	-3.26412	0.00124334	0.0193982	-1.21482	TACC1	protein_coding	down
ENSG00000135829.17	-0.0851492	7.24135	-3.26319	0.00124729	0.0194244	-1.21791	DHX9	protein_coding	down
ENSG00000257103.8	-0.0733306	7.09673	-3.26296	0.00124824	0.0194244	-1.22163	LSM14A	protein_coding	down
ENSG00000100811.13	-0.0777607	7.20062	-3.26245	0.00125041	0.0194244	-1.22337	YY1	protein_coding	down
ENSG00000196684.12	0.207406	5.25001	3.26233	0.00125091	0.0194244	-1.1994	HSH2D	protein_coding	up
ENSG00000166562.9	0.119896	2.9152	3.25908	0.00126476	0.0196165	-1.06169	SEC11C	protein_coding	up
ENSG00000121390.18	0.0765789	5.10557	3.25787	0.00126995	0.0196737	-1.19504	PSPC1	protein_coding	up
ENSG00000169891.18	0.200792	4.75381	3.2571	0.00127328	0.0197023	-1.19216	REPS2	protein_coding	up
ENSG00000128594.8	0.221729	4.35836	3.25664	0.00127523	0.0197094	-1.15884	LRRC4	protein_coding	up
ENSG00000165916.8	-0.0841965	3.90358	-3.25587	0.00127858	0.0197339	-1.10298	PSMC3	protein_coding	down
ENSG00000166311.10	0.1093	3.78786	3.25558	0.00127982	0.0197339	-1.11886	SMPD1	protein_coding	up
ENSG00000243667.7	0.140626	1.43694	3.25524	0.00128131	0.0197339	-1.09411	WDR92	protein_coding	up
ENSG00000180884.10	0.152319	2.65308	3.25452	0.00128443	0.0197497	-1.06894	ZNF792	protein_coding	up
ENSG00000143157.11	-0.073955	6.55179	-3.25431	0.00128532	0.0197497	-1.24753	POGK	protein_coding	down
ENSG00000008516.17	0.372405	4.87142	3.25303	0.00129094	0.0198129	-1.18062	MMP25	protein_coding	up
ENSG00000087274.17	0.117543	7.48235	3.25156	0.00129734	0.0198427	-1.25987	ADD1	protein_coding	up
ENSG00000119242.8	0.189533	3.28989	3.25149	0.00129767	0.0198427	-1.09821	CCDC92	protein_coding	up
ENSG00000072736.19	0.0807612	6.88438	3.25136	0.00129825	0.0198427	-1.2647	NFATC3	protein_coding	up
ENSG00000183735.10	-0.120832	5.19564	-3.25121	0.0012989	0.0198427	-1.20809	TBK1	protein_coding	down
ENSG00000018510.15	-0.101624	6.02911	-3.25013	0.00130365	0.0198559	-1.2396	AGPS	protein_coding	down
ENSG00000259834.1	0.291722	2.86529	3.24971	0.00130549	0.0198559	-1.09318	AL365361.1	lincRNA	up
ENSG00000182287.14	-0.146021	8.64118	-3.24957	0.00130613	0.0198559	-1.23271	AP1S2	protein_coding	down
ENSG00000114166.8	0.148665	5.96532	3.2493	0.00130729	0.0198559	-1.26307	KAT2B	protein_coding	up
ENSG00000168016.14	0.21982	6.34507	3.24904	0.00130843	0.0198559	-1.26285	TRANK1	protein_coding	up
ENSG00000225791.6	-0.176291	1.44842	-3.24896	0.00130878	0.0198559	-1.1308	TRAM2-AS1	lincRNA	down
ENSG00000133657.15	-0.141489	6.6925	-3.24732	0.00131606	0.0199246	-1.26751	ATP13A3	protein_coding	down
ENSG00000065883.16	0.0562882	6.89237	3.24726	0.00131633	0.0199246	-1.27582	CDK13	protein_coding	up
ENSG00000206344.7	0.280287	3.15801	3.24654	0.00131956	0.0199506	-1.11007	HCG27	lincRNA	up
ENSG00000107771.17	0.0933274	5.67314	3.24342	0.00133352	0.0201387	-1.2724	CCSER2	protein_coding	up
ENSG00000100129.18	-0.114694	8.36524	-3.24275	0.00133651	0.0201607	-1.27116	EIF3L	protein_coding	down
ENSG00000150961.15	-0.0965421	6.05531	-3.24197	0.00134005	0.0201653	-1.27944	SEC24D	protein_coding	down
ENSG00000116786.13	-0.086275	6.31095	-3.24178	0.00134092	0.0201653	-1.27913	PLEKHM2	protein_coding	down
ENSG00000111647.13	-0.0856068	6.78887	-3.24167	0.0013414	0.0201653	-1.28474	UHRF1BP1L	protein_coding	down
ENSG00000164111.15	-0.137201	8.01013	-3.24056	0.00134644	0.020218	-1.27469	ANXA5	protein_coding	down
ENSG00000129473.9	-0.140712	4.12141	-3.23934	0.00135197	0.0202662	-1.18358	BCL2L2	protein_coding	down
ENSG00000101236.17	0.119877	6.81491	3.23901	0.00135351	0.0202662	-1.29433	RNF24	protein_coding	up
ENSG00000172663.9	0.125399	3.23978	3.2386	0.00135536	0.0202662	-1.1415	TMEM134	protein_coding	up
ENSG00000166275.15	-0.145062	4.37332	-3.23851	0.00135579	0.0202662	-1.19347	BORCS7	protein_coding	down
ENSG00000279833.1	0.214011	2.23915	3.23709	0.00136226	0.02034	-1.11404	AL031846.2	antisense	up
ENSG00000129460.16	-0.104564	4.04436	-3.23668	0.00136414	0.020345	-1.18731	NGDN	protein_coding	down
ENSG00000130755.13	0.120756	5.7566	3.23557	0.00136929	0.0203987	-1.26972	GMFG	protein_coding	up
ENSG00000160785.13	0.0980209	5.52772	3.23402	0.00137642	0.0204818	-1.286	SLC25A44	protein_coding	up
ENSG00000187231.14	-0.140774	6.06364	-3.23312	0.00138063	0.020503	-1.29868	SESTD1	protein_coding	down
ENSG00000184831.13	0.228079	0.0254135	3.23288	0.00138173	0.020503	-1.43486	APOO	protein_coding	up
ENSG00000182551.14	-0.104821	5.15546	-3.23231	0.00138439	0.020503	-1.268	ADI1	protein_coding	down
ENSG00000181744.8	-0.115112	5.8511	-3.23231	0.0013844	0.020503	-1.29357	DIPK2A	protein_coding	down
ENSG00000131043.12	-0.0806354	4.47571	-3.23205	0.00138561	0.020503	-1.23137	AAR2	protein_coding	down
ENSG00000130518.17	0.265985	3.24188	3.23133	0.00138896	0.0205296	-1.15292	IQCN	protein_coding	up
ENSG00000110700.7	-0.096995	7.48225	-3.23021	0.00139421	0.020575	-1.30412	RPS13	protein_coding	down
ENSG00000285851.1	0.21521	2.34314	3.22957	0.00139719	0.020575	-1.13464	AL359762.3	processed_transcript	up
ENSG00000138101.18	0.182613	1.9299	3.22918	0.00139904	0.020575	-1.14799	DTNB	protein_coding	up
ENSG00000137414.6	0.151873	5.82679	3.22885	0.00140057	0.020575	-1.32253	FAM8A1	protein_coding	up
ENSG00000143641.10	-0.0918222	5.87203	-3.22869	0.00140135	0.020575	-1.31003	GALNT2	protein_coding	down
ENSG00000269743.3	0.218523	1.01054	3.22868	0.00140139	0.020575	-1.22463	SLC25A53	protein_coding	up
ENSG00000204394.13	-0.105021	5.33555	-3.22828	0.00140326	0.0205796	-1.28821	VARS	protein_coding	down
ENSG00000130640.13	-0.0993744	6.43318	-3.22782	0.00140545	0.0205888	-1.3236	TUBGCP2	protein_coding	down
ENSG00000078687.17	0.213535	3.6679	3.22694	0.00140962	0.0206096	-1.20005	TNRC6C	protein_coding	up
ENSG00000070770.9	-0.121096	6.04513	-3.22675	0.00141049	0.0206096	-1.32245	CSNK2A2	protein_coding	down
ENSG00000277157.1	0.247818	2.09134	3.22653	0.00141155	0.0206096	-1.14376	HIST1H4D	protein_coding	up
ENSG00000083099.11	-0.0943088	4.51096	-3.22533	0.00141725	0.0206699	-1.25596	LYRM2	protein_coding	down
ENSG00000163235.16	0.284834	2.79332	3.22469	0.0014203	0.0206752	-1.15839	TGFA	protein_coding	up
ENSG00000263072.6	0.178506	1.81114	3.22444	0.0014215	0.0206752	-1.16268	ZNF213-AS1	antisense	up
ENSG00000198218.11	-0.0722762	6.29379	-3.22427	0.00142231	0.0206752	-1.33916	QRICH1	protein_coding	down
ENSG00000131503.21	-0.133089	7.15936	-3.2236	0.00142552	0.0206878	-1.34426	ANKHD1	protein_coding	down
ENSG00000283674.2	0.295458	2.35095	3.22343	0.00142631	0.0206878	-1.15236	AC068587.4	processed_transcript	up
ENSG00000206418.4	-0.133295	4.63494	-3.22223	0.00143209	0.0207341	-1.26336	RAB12	protein_coding	down
ENSG00000186654.21	0.46071	1.25615	3.22211	0.00143265	0.0207341	-1.20642	PRR5	protein_coding	up
ENSG00000234420.7	0.132332	3.7	3.22062	0.00143983	0.0208108	-1.22703	ZNF37BP	transcribed_processed_pseudogene	up
ENSG00000057935.13	0.162954	2.28973	3.22036	0.0014411	0.0208108	-1.16045	MTA3	protein_coding	up
ENSG00000122566.21	-0.0875753	8.30784	-3.21934	0.00144603	0.0208444	-1.34242	HNRNPA2B1	protein_coding	down
ENSG00000260078.3	0.29061	2.17843	3.21923	0.00144658	0.0208444	-1.16362	AC007342.3	transcribed_unprocessed_pseudogene	up
ENSG00000198695.2	-0.257198	8.23904	-3.21871	0.00144908	0.0208575	-1.28934	MT-ND6	protein_coding	down
ENSG00000144895.12	-0.10724	6.67133	-3.21629	0.00146091	0.0210049	-1.34758	EIF2A	protein_coding	down
ENSG00000105939.13	0.120109	7.20691	3.21516	0.00146646	0.0210495	-1.37191	ZC3HAV1	protein_coding	up
ENSG00000268362.5	0.20962	1.459	3.21501	0.0014672	0.0210495	-1.21485	AC092279.1	lincRNA	up
ENSG00000122435.10	0.148022	2.67962	3.21465	0.00146897	0.021052	-1.18571	TRMT13	protein_coding	up
ENSG00000161267.12	0.317417	1.50846	3.21247	0.0014797	0.0211829	-1.21194	BDH1	protein_coding	up
ENSG00000234436.1	-0.438809	-1.27784	-3.21168	0.00148361	0.0212158	-1.94188	AC245884.2	unprocessed_pseudogene	down
ENSG00000035115.21	0.165831	2.68577	3.21118	0.00148612	0.0212287	-1.19504	SH3YL1	protein_coding	up
ENSG00000170315.13	0.222513	7.26324	3.2104	0.00149	0.021257	-1.37112	UBB	protein_coding	up
ENSG00000196747.4	0.295381	1.11558	3.21013	0.00149132	0.021257	-1.23754	HIST1H2AI	protein_coding	up
ENSG00000143162.9	-0.13902	7.41778	-3.20975	0.00149324	0.0212614	-1.37305	CREG1	protein_coding	down
ENSG00000105355.9	-0.114867	6.17994	-3.20876	0.0014982	0.0213089	-1.37077	PLIN3	protein_coding	down
ENSG00000176619.13	-0.104827	3.60863	-3.20814	0.00150133	0.0213306	-1.24131	LMNB2	protein_coding	down
ENSG00000159496.14	0.216166	2.31574	3.20701	0.00150699	0.021388	-1.1978	RGL4	protein_coding	up
ENSG00000169714.16	-0.0687278	8.14665	-3.20564	0.00151394	0.0214634	-1.3809	CNBP	protein_coding	down
ENSG00000180354.16	0.198058	4.92014	3.20264	0.00152916	0.021656	-1.362	MTURN	protein_coding	up
ENSG00000150977.10	-0.106377	6.15407	-3.20088	0.00153818	0.0217392	-1.393	RILPL2	protein_coding	down
ENSG00000065613.14	-0.0734804	6.82063	-3.20085	0.00153833	0.0217392	-1.40509	SLK	protein_coding	down
ENSG00000182718.16	-0.0940156	8.82174	-3.19986	0.00154344	0.021788	-1.38552	ANXA2	protein_coding	down
ENSG00000131042.14	-0.120313	8.314	-3.19741	0.0015561	0.0219434	-1.40858	LILRB2	protein_coding	down
ENSG00000179361.17	0.096304	4.97494	3.1964	0.00156138	0.0219943	-1.37056	ARID3B	protein_coding	up
ENSG00000166313.19	0.271431	1.74287	3.19566	0.00156523	0.0220251	-1.24699	APBB1	protein_coding	up
ENSG00000171863.14	-0.144345	7.82263	-3.19505	0.00156842	0.0220464	-1.40031	RPS7	protein_coding	down
ENSG00000286070.1	-0.24397	2.32615	-3.193	0.00157917	0.0221739	-1.23699	GGT1	protein_coding	down
ENSG00000125089.17	-0.151562	6.59983	-3.1923	0.00158284	0.0222004	-1.41748	SH3TC1	protein_coding	down
ENSG00000160883.11	-0.130768	7.31834	-3.192	0.00158442	0.0222004	-1.41935	HK3	protein_coding	down
ENSG00000263335.1	0.32165	1.47996	3.19125	0.00158841	0.0222194	-1.27068	AF001548.2	antisense	up
ENSG00000153879.9	-0.104673	5.43434	-3.19111	0.00158915	0.0222194	-1.39753	CEBPG	protein_coding	down
ENSG00000170889.14	-0.146511	9.05001	-3.18954	0.00159747	0.0223122	-1.41352	RPS9	protein_coding	down
ENSG00000159674.12	0.399085	0.943234	3.18915	0.00159955	0.0223177	-1.3263	SPON2	protein_coding	up
ENSG00000112234.9	0.091967	5.17128	3.18751	0.00160826	0.0223775	-1.41501	FBXL4	protein_coding	up
ENSG00000108387.14	0.305554	0.596196	3.1875	0.00160832	0.0223775	-1.41455	2025-09-04	protein_coding	up
ENSG00000179406.7	0.175396	3.06484	3.18739	0.00160893	0.0223775	-1.27937	LINC00174	processed_transcript	up
ENSG00000123091.5	0.139454	6.31517	3.18697	0.0016112	0.0223856	-1.45559	RNF11	protein_coding	up
ENSG00000077147.16	-0.0873401	7.0007	-3.18615	0.00161559	0.0224228	-1.44728	TM9SF3	protein_coding	down
ENSG00000004139.14	0.142187	3.50477	3.18582	0.00161735	0.0224238	-1.3047	SARM1	protein_coding	up
ENSG00000174373.16	0.0882024	5.57665	3.1854	0.00161964	0.0224319	-1.44114	RALGAPA1	protein_coding	up
ENSG00000129219.14	-0.158539	4.71086	-3.18474	0.00162317	0.0224573	-1.37601	PLD2	protein_coding	down
ENSG00000143067.5	-0.155408	4.19592	-3.1844	0.001625	0.022459	-1.34893	ZNF697	protein_coding	down
ENSG00000272501.1	0.204603	3.31015	3.18128	0.00164194	0.0226012	-1.3128	AL662844.4	antisense	up
ENSG00000065357.20	0.13128	5.58144	3.18127	0.00164202	0.0226012	-1.45599	DGKA	protein_coding	up
ENSG00000142657.21	-0.119091	7.49507	-3.18109	0.00164297	0.0226012	-1.45229	PGD	protein_coding	down
ENSG00000119950.21	0.172893	5.93111	3.18098	0.00164361	0.0226012	-1.46652	MXI1	protein_coding	up
ENSG00000196419.12	-0.0811494	7.09291	-3.18066	0.00164535	0.0226012	-1.45811	XRCC6	protein_coding	down
ENSG00000082153.18	-0.086963	7.57695	-3.18062	0.00164556	0.0226012	-1.46151	BZW1	protein_coding	down
ENSG00000182389.19	0.324493	2.59427	3.1775	0.00166271	0.0227935	-1.28559	CACNB4	protein_coding	up
ENSG00000146376.11	0.148166	4.26772	3.17744	0.00166302	0.0227935	-1.37903	ARHGAP18	protein_coding	up
ENSG00000160959.8	0.108125	4.14789	3.17703	0.00166529	0.022801	-1.38152	LRRC14	protein_coding	up
ENSG00000275221.1	0.365708	1.33583	3.17624	0.00166969	0.0228375	-1.3063	HIST1H2AK	protein_coding	up
ENSG00000104976.12	-0.126332	3.27137	-3.17478	0.00167778	0.0229166	-1.31268	SNAPC2	protein_coding	down
ENSG00000155463.13	-0.10376	6.9122	-3.17422	0.0016809	0.0229166	-1.48531	OXA1L	protein_coding	down
ENSG00000008083.14	-0.116746	7.18925	-3.17421	0.00168093	0.0229166	-1.49161	JARID2	protein_coding	down
ENSG00000132670.20	0.0855622	5.76105	3.1738	0.00168324	0.0229166	-1.47781	PTPRA	protein_coding	up
ENSG00000186260.16	0.163411	3.20489	3.17333	0.00168585	0.0229166	-1.32513	MRTFB	protein_coding	up
ENSG00000257093.7	0.12814	4.94443	3.17333	0.00168588	0.0229166	-1.45183	KIAA1147	protein_coding	up
ENSG00000120318.16	0.165699	4.97328	3.1729	0.0016883	0.0229257	-1.44343	ARAP3	protein_coding	up
ENSG00000181163.13	-0.0903034	6.91345	-3.17183	0.00169429	0.0229834	-1.48248	NPM1	protein_coding	down
ENSG00000124120.11	0.134045	4.02266	3.17074	0.00170038	0.0230393	-1.39441	TTPAL	protein_coding	up
ENSG00000285756.1	0.452914	3.19918	3.17048	0.00170189	0.0230393	-1.33349	BX890604.2	lincRNA	up
ENSG00000261471.1	0.19178	3.57758	3.16756	0.00171842	0.0232391	-1.36211	AC092145.1	antisense	up
ENSG00000101460.13	0.343264	-0.0238852	3.1665	0.00172445	0.0232749	-1.62628	MAP1LC3A	protein_coding	up
ENSG00000165801.10	-0.131496	6.97713	-3.16648	0.00172459	0.0232749	-1.51254	ARHGEF40	protein_coding	down
ENSG00000248323.6	0.295514	5.04713	3.16549	0.00173021	0.0233035	-1.47092	LUCAT1	antisense	up
ENSG00000163545.8	0.164859	6.14645	3.16549	0.00173024	0.0233035	-1.51257	NUAK2	protein_coding	up
ENSG00000213918.10	0.15425	4.28137	3.16482	0.00173406	0.0233311	-1.42432	DNASE1	protein_coding	up
ENSG00000059573.9	0.216313	2.00475	3.16421	0.00173755	0.0233543	-1.31759	ALDH18A1	protein_coding	up
ENSG00000196730.13	-0.156726	7.05696	-3.16373	0.00174033	0.0233679	-1.51178	DAPK1	protein_coding	down
ENSG00000134830.5	0.168287	5.50571	3.16163	0.00175245	0.0235066	-1.51202	C5AR2	protein_coding	up
ENSG00000145425.10	-0.177186	9.27671	-3.16045	0.00175931	0.023555	-1.48765	RPS3A	protein_coding	down
ENSG00000267575.6	0.163672	2.10846	3.1604	0.00175962	0.023555	-1.32682	AC006504.5	lincRNA	up
ENSG00000233382.7	0.178396	0.869438	3.15884	0.00176872	0.0236291	-1.43114	NKAPP1	transcribed_processed_pseudogene	up
ENSG00000273802.2	0.233948	2.40647	3.15883	0.00176874	0.0236291	-1.33356	HIST1H2BG	protein_coding	up
ENSG00000057704.13	0.203196	4.97265	3.15822	0.00177232	0.0236531	-1.49468	TMCC3	protein_coding	up
ENSG00000063046.17	-0.117206	9.15543	-3.1567	0.00178124	0.0237416	-1.50894	EIF4B	protein_coding	down
ENSG00000273587.1	0.582729	-1.95489	3.15642	0.00178287	0.0237416	-2.09506	SNORA78	snoRNA	up
ENSG00000104231.11	-0.12356	4.38456	-3.15617	0.00178436	0.0237416	-1.43838	ZFAND1	protein_coding	down
ENSG00000265681.7	-0.172475	8.20841	-3.15561	0.00178766	0.023752	-1.51534	RPL17	protein_coding	down
ENSG00000065548.18	-0.118292	5.70724	-3.15543	0.00178873	0.023752	-1.49991	ZC3H15	protein_coding	down
ENSG00000214900.9	0.221433	2.38047	3.15486	0.0017921	0.0237728	-1.34356	LINC01588	lincRNA	up
ENSG00000106733.21	0.257176	2.09411	3.15454	0.00179398	0.0237739	-1.34252	NMRK1	protein_coding	up
ENSG00000112303.14	0.245631	7.62191	3.15421	0.00179596	0.0237763	-1.54397	VNN2	protein_coding	up
ENSG00000151883.18	0.126002	7.37275	3.1539	0.00179778	0.0237765	-1.55126	PARP8	protein_coding	up
ENSG00000156711.17	0.261888	2.87587	3.15352	0.00180002	0.0237823	-1.35941	MAPK13	protein_coding	up
ENSG00000180329.14	-0.0965075	3.78379	-3.15269	0.00180497	0.0238167	-1.40581	CCDC43	protein_coding	down
ENSG00000072110.13	0.115521	7.10752	3.15248	0.00180624	0.0238167	-1.55854	ACTN1	protein_coding	up
ENSG00000128271.22	0.277407	2.74214	3.14951	0.00182401	0.0240236	-1.36398	ADORA2A	protein_coding	up
ENSG00000207445.1	-0.547033	-0.268674	-3.14925	0.00182557	0.0240236	-1.6943	SNORD15B	snoRNA	down
ENSG00000101966.12	-0.100459	5.94011	-3.14848	0.00183023	0.0240609	-1.55623	XIAP	protein_coding	down
ENSG00000029993.15	-0.235944	2.12183	-3.14636	0.00184306	0.0241921	-1.36759	HMGB3	protein_coding	down
ENSG00000101182.15	-0.0804077	5.56492	-3.14622	0.00184387	0.0241921	-1.52281	PSMA7	protein_coding	down
ENSG00000175274.18	0.198707	4.46604	3.14575	0.00184674	0.0242057	-1.47562	TP53I11	protein_coding	up
ENSG00000186767.6	-0.14193	2.71017	-3.14496	0.00185155	0.0242447	-1.37406	SPIN4	protein_coding	down
ENSG00000169813.16	-0.0749487	7.04999	-3.14449	0.00185441	0.024258	-1.5719	HNRNPF	protein_coding	down
ENSG00000175662.17	0.141248	4.61534	3.14351	0.00186045	0.024313	-1.50457	TOM1L2	protein_coding	up
ENSG00000122643.20	0.137649	4.47646	3.14269	0.00186546	0.0243543	-1.50067	NT5C3A	protein_coding	up
ENSG00000164889.14	-0.0927294	5.62489	-3.14221	0.00186837	0.0243683	-1.55408	SLC4A2	protein_coding	down
ENSG00000250571.7	0.122839	3.24743	3.1409	0.00187647	0.0244401	-1.41737	GLI4	protein_coding	up
ENSG00000181649.7	-0.353679	0.423402	-3.14044	0.00187932	0.0244401	-1.59668	PHLDA2	protein_coding	down
ENSG00000066923.17	0.203998	1.66769	3.14017	0.00188099	0.0244401	-1.39379	STAG3	protein_coding	up
ENSG00000082074.17	0.131869	9.22116	3.14012	0.00188129	0.0244401	-1.557	FYB1	protein_coding	up
ENSG00000125245.12	0.219704	2.33957	3.13745	0.00189791	0.0246317	-1.3915	GPR18	protein_coding	up
ENSG00000115339.13	0.127628	4.09576	3.13655	0.00190349	0.0246799	-1.49856	GALNT3	protein_coding	up
ENSG00000187257.16	0.094271	5.24834	3.13502	0.00191308	0.0247799	-1.57406	RSBN1L	protein_coding	up
ENSG00000119922.10	0.314292	5.36537	3.13418	0.0019184	0.024809	-1.57874	IFIT2	protein_coding	up
ENSG00000273749.5	-0.134787	6.96374	-3.13407	0.00191908	0.024809	-1.59505	CYFIP1	protein_coding	down
ENSG00000019582.15	-0.11937	11.3909	-3.13329	0.00192402	0.0248485	-1.53018	CD74	protein_coding	down
ENSG00000102144.15	-0.0845872	8.28984	-3.13056	0.00194133	0.0250475	-1.6009	PGK1	protein_coding	down
ENSG00000071553.17	-0.0844141	6.97773	-3.13	0.0019449	0.0250691	-1.6201	ATP6AP1	protein_coding	down
ENSG00000259207.7	0.708548	3.76102	3.12966	0.00194706	0.0250724	-1.49195	ITGB3	protein_coding	up
ENSG00000128694.12	0.156764	1.5283	3.12855	0.00195418	0.0251396	-1.42914	OSGEPL1	protein_coding	up
ENSG00000119535.17	0.122253	9.77395	3.12765	0.00195994	0.0251846	-1.58263	CSF3R	protein_coding	up
ENSG00000185252.19	0.150879	2.44927	3.12741	0.00196149	0.0251846	-1.42004	ZNF74	protein_coding	up
ENSG00000108055.9	-0.0906653	5.28257	-3.1267	0.00196601	0.0252088	-1.58096	SMC3	protein_coding	down
ENSG00000130517.14	-0.136127	5.52222	-3.12652	0.0019672	0.0252088	-1.60175	PGPEP1	protein_coding	down
ENSG00000089505.17	0.284089	1.17837	3.12523	0.00197555	0.0252912	-1.47832	CMTM1	protein_coding	up
ENSG00000128891.15	0.125124	3.98794	3.12449	0.00198036	0.0253283	-1.52572	CCDC32	protein_coding	up
ENSG00000119280.16	0.242526	2.16932	3.1233	0.00198806	0.0254022	-1.42801	C1orf198	protein_coding	up
ENSG00000140829.12	-0.0887424	5.29525	-3.12253	0.00199306	0.025436	-1.59635	DHX38	protein_coding	down
ENSG00000150054.18	-0.141488	5.98538	-3.12213	0.00199572	0.025436	-1.61634	MPP7	protein_coding	down
ENSG00000242574.9	-0.170268	7.69839	-3.12201	0.00199649	0.025436	-1.62891	HLA-DMB	protein_coding	down
ENSG00000135506.16	-0.0950095	7.6558	-3.12138	0.0020006	0.0254638	-1.63346	OS9	protein_coding	down
ENSG00000206941.1	-0.634904	-1.93841	-3.12089	0.00200379	0.0254799	-2.29666	SNORD15A	snoRNA	down
ENSG00000147168.12	0.245938	5.20402	3.12038	0.00200714	0.0254978	-1.60719	IL2RG	protein_coding	up
ENSG00000282988.2	0.238082	4.93168	3.11998	0.00200981	0.0255072	-1.58841	AL031777.3	protein_coding	up
ENSG00000115756.13	0.12049	5.45728	3.11924	0.00201468	0.0255445	-1.62299	HPCAL1	protein_coding	up
ENSG00000026103.22	0.159749	4.93689	3.11839	0.00202029	0.025591	-1.61194	FAS	protein_coding	up
ENSG00000160199.14	0.106857	3.8216	3.11759	0.00202556	0.0256331	-1.53205	PKNOX1	protein_coding	up
ENSG00000168538.16	-0.0846773	6.21032	-3.11689	0.00203023	0.0256677	-1.64303	TRAPPC11	protein_coding	down
ENSG00000187742.14	0.0805851	5.62646	3.11605	0.00203577	0.0257131	-1.64947	SECISBP2	protein_coding	up
ENSG00000197363.9	0.118736	2.03244	3.11533	0.00204061	0.0257328	-1.45007	ZNF517	protein_coding	up
ENSG00000206190.11	0.272309	3.446	3.11523	0.00204123	0.0257328	-1.51052	ATP10A	protein_coding	up
ENSG00000083123.15	0.188612	1.67193	3.11399	0.00204954	0.0258045	-1.46293	BCKDHB	protein_coding	up
ENSG00000155096.14	-0.0709986	7.33474	-3.11374	0.00205119	0.0258045	-1.66191	AZIN1	protein_coding	down
ENSG00000100325.15	0.176997	5.4384	3.11327	0.00205435	0.0258045	-1.64614	ASCC2	protein_coding	up
ENSG00000181982.18	-0.139905	5.06576	-3.11322	0.00205474	0.0258045	-1.60827	CCDC149	protein_coding	down
ENSG00000180398.12	-0.114109	5.78351	-3.1125	0.00205951	0.0258399	-1.64479	MCFD2	protein_coding	down
ENSG00000062650.19	-0.0608333	6.9946	-3.1118	0.00206428	0.0258751	-1.66656	WAPL	protein_coding	down
ENSG00000204103.4	-0.192905	7.59569	-3.1115	0.00206628	0.0258756	-1.6581	MAFB	protein_coding	down
ENSG00000185745.10	0.376929	3.91212	3.1101	0.00207575	0.0259695	-1.5579	IFIT1	protein_coding	up
ENSG00000196205.8	-0.111489	6.65352	-3.10823	0.00208847	0.0260348	-1.65008	EEF1A1P5	processed_pseudogene	down
ENSG00000214485.6	-0.214602	1.87094	-3.10815	0.00208902	0.0260348	-1.47386	RPL7P1	processed_pseudogene	down
ENSG00000100353.18	-0.0832167	7.08139	-3.10815	0.00208903	0.0260348	-1.67455	EIF3D	protein_coding	down
ENSG00000118308.15	0.0906664	5.9974	3.10803	0.00208982	0.0260348	-1.67755	LRMP	protein_coding	up
ENSG00000136156.14	0.104453	9.69335	3.10788	0.00209083	0.0260348	-1.64016	ITM2B	protein_coding	up
ENSG00000238795.1	0.20503	3.94295	3.10658	0.00209971	0.0261207	-1.53895	SCARNA12	snoRNA	up
ENSG00000134287.10	-0.0848068	7.59179	-3.10622	0.00210217	0.0261267	-1.68839	ARF3	protein_coding	down
ENSG00000244026.6	0.198774	1.18117	3.10589	0.00210448	0.0261308	-1.52854	FAM86DP	transcribed_unprocessed_pseudogene	up
ENSG00000139266.6	0.144588	2.45786	3.1054	0.00210782	0.0261477	-1.47845	2025-03-09	protein_coding	up
ENSG00000126067.12	-0.102062	5.88648	-3.10346	0.00212122	0.0262677	-1.67629	PSMB2	protein_coding	down
ENSG00000156931.15	0.0903743	6.21272	3.10342	0.00212148	0.0262677	-1.69575	VPS8	protein_coding	up
ENSG00000159140.20	-0.116729	9.11477	-3.10308	0.0021238	0.0262718	-1.66942	SON	protein_coding	down
ENSG00000146433.8	0.0907077	4.54892	3.10192	0.00213183	0.0263464	-1.63468	TMEM181	protein_coding	up
ENSG00000103942.13	0.219686	1.90376	3.09979	0.00214667	0.026505	-1.49354	HOMER2	protein_coding	up
ENSG00000268861.6	0.184779	4.80691	3.09914	0.00215123	0.0265366	-1.64976	AC008878.3	protein_coding	up
ENSG00000111640.15	-0.116122	10.3825	-3.09837	0.00215666	0.0265786	-1.65283	GAPDH	protein_coding	down
ENSG00000166783.22	0.0994825	7.35665	3.09759	0.00216216	0.0266045	-1.71592	MARF1	protein_coding	up
ENSG00000165209.18	0.193443	2.29776	3.0975	0.00216279	0.0266045	-1.49918	STRBP	protein_coding	up
ENSG00000186814.14	0.137491	2.74941	3.09687	0.00216719	0.0266249	-1.51602	ZSCAN30	protein_coding	up
ENSG00000213066.13	0.1762	2.9821	3.09669	0.00216848	0.0266249	-1.53172	FGFR1OP	protein_coding	up
ENSG00000140264.19	0.111663	8.27932	3.09544	0.00217728	0.0267081	-1.70766	SERF2	protein_coding	up
ENSG00000160325.14	-0.171816	3.56734	-3.09401	0.00218745	0.026808	-1.55957	CACFD1	protein_coding	down
ENSG00000110756.17	-0.0947155	4.90595	-3.09323	0.00219299	0.0268509	-1.66064	HPS5	protein_coding	down
ENSG00000107897.19	-0.0905117	4.97767	-3.09226	0.00219993	0.026911	-1.66871	ACBD5	protein_coding	down
ENSG00000076770.14	0.168566	6.79844	3.09132	0.00220663	0.0269679	-1.73758	MBNL3	protein_coding	up
ENSG00000018189.13	-0.107951	5.81053	-3.0907	0.00221111	0.0269864	-1.70887	RUFY3	protein_coding	down
ENSG00000181450.17	0.148341	2.82056	3.09054	0.00221223	0.0269864	-1.54088	ZNF678	protein_coding	up
ENSG00000149658.18	-0.0835985	5.62709	-3.09014	0.00221515	0.026997	-1.71064	YTHDF1	protein_coding	down
ENSG00000119655.10	-0.103009	7.20388	-3.08867	0.00222571	0.0271007	-1.73253	NPC2	protein_coding	down
ENSG00000174456.14	0.106734	3.87568	3.08762	0.00223332	0.0271595	-1.62537	C12orf76	protein_coding	up
ENSG00000166979.13	0.27472	0.709962	3.08744	0.00223466	0.0271595	-1.62829	EVA1C	protein_coding	up
ENSG00000004487.16	-0.0704105	5.40049	-3.08618	0.00224376	0.0272451	-1.70671	KDM1A	protein_coding	down
ENSG00000198730.9	-0.0924446	5.62018	-3.08558	0.00224815	0.0272651	-1.72563	CTR9	protein_coding	down
ENSG00000169016.17	-0.122126	2.89838	-3.08539	0.00224954	0.0272651	-1.54925	E2F6	protein_coding	down
ENSG00000156414.19	-0.355526	3.3757	-3.08289	0.00226786	0.0274619	-1.5725	TDRD9	protein_coding	down
ENSG00000118961.15	0.144916	2.79788	3.08246	0.00227103	0.0274751	-1.55784	LDAH	protein_coding	up
ENSG00000228784.8	0.180134	2.2985	3.08035	0.00228657	0.0276377	-1.54507	LINC00954	lincRNA	up
ENSG00000187097.12	0.104774	3.41828	3.07918	0.00229525	0.0276993	-1.60707	ENTPD5	protein_coding	up
ENSG00000205018.2	0.220564	0.905008	3.0791	0.00229586	0.0276993	-1.61039	AC092384.1	antisense	up
ENSG00000162783.10	-0.141339	6.85547	-3.07833	0.00230159	0.0277431	-1.73637	IER5	protein_coding	down
ENSG00000112531.17	-0.0754603	8.92858	-3.07743	0.00230833	0.0277819	-1.74536	QKI	protein_coding	down
ENSG00000161021.13	0.0852801	6.21734	3.07734	0.00230902	0.0277819	-1.76742	MAML1	protein_coding	up
ENSG00000143079.15	-0.181122	3.49679	-3.07651	0.00231519	0.0278307	-1.60339	CTTNBP2NL	protein_coding	down
ENSG00000158623.14	-0.171494	4.04094	-3.07488	0.00232743	0.0279363	-1.64689	COPG2	protein_coding	down
ENSG00000187764.11	0.111163	7.5885	3.07478	0.0023282	0.0279363	-1.77848	SEMA4D	protein_coding	up
ENSG00000160326.14	-0.148903	5.84624	-3.0743	0.0023318	0.0279395	-1.75192	SLC2A6	protein_coding	down
ENSG00000116157.6	0.392235	0.551008	3.07418	0.0023327	0.0279395	-1.68917	GPX7	protein_coding	up
ENSG00000164253.14	-0.097432	5.05444	-3.07338	0.00233877	0.0279867	-1.72187	WDR41	protein_coding	down
ENSG00000107819.13	-0.111245	5.61234	-3.07288	0.00234257	0.0280068	-1.75794	SFXN3	protein_coding	down
ENSG00000123360.12	-0.151502	3.31977	-3.07259	0.00234478	0.028007	-1.60458	PDE1B	protein_coding	down
ENSG00000140105.18	-0.176054	8.47608	-3.07232	0.00234683	0.028007	-1.76768	WARS	protein_coding	down
ENSG00000124198.9	-0.09725	6.23162	-3.07193	0.00234978	0.0280169	-1.77745	ARFGEF2	protein_coding	down
ENSG00000115825.10	-0.0971308	6.55946	-3.07154	0.00235274	0.0280253	-1.78299	PRKD3	protein_coding	down
ENSG00000078124.12	-0.119085	6.02782	-3.07128	0.00235473	0.0280253	-1.76748	ACER3	protein_coding	down
ENSG00000234616.8	0.104553	4.2658	3.07078	0.00235851	0.028045	-1.6969	JRK	protein_coding	up
ENSG00000129128.13	-0.0737145	7.87149	-3.06558	0.00239845	0.0284942	-1.79563	SPCS3	protein_coding	down
ENSG00000114391.13	-0.0839095	7.06347	-3.06411	0.00240984	0.0286038	-1.78506	RPL24	protein_coding	down
ENSG00000160593.18	0.10962	8.79389	3.06278	0.00242025	0.0287016	-1.78632	JAML	protein_coding	up
ENSG00000198920.10	0.0914703	3.55355	3.06215	0.00242517	0.0287342	-1.6633	KIAA0753	protein_coding	up
ENSG00000232112.3	-0.118855	5.06459	-3.06155	0.00242986	0.0287639	-1.71473	TMA7	protein_coding	down
ENSG00000221923.9	0.192763	1.67858	3.06114	0.00243306	0.0287692	-1.60032	ZNF880	protein_coding	up
ENSG00000144224.17	-0.0886546	6.67044	-3.06093	0.00243467	0.0287692	-1.8176	UBXN4	protein_coding	down
ENSG00000119335.16	-0.0650179	7.96984	-3.06063	0.00243706	0.0287717	-1.80587	SET	protein_coding	down
ENSG00000149346.15	0.112137	3.77203	3.05677	0.00246757	0.0291058	-1.69816	SLX4IP	protein_coding	up
ENSG00000161955.16	-0.128225	6.35327	-3.05608	0.00247302	0.029132	-1.80922	TNFSF13	protein_coding	down
ENSG00000170458.14	-0.182881	8.94095	-3.05593	0.0024742	0.029132	-1.80622	CD14	protein_coding	down
ENSG00000183520.12	-0.142964	3.99813	-3.05544	0.00247815	0.0291525	-1.70443	UTP11	protein_coding	down
ENSG00000255026.1	0.433299	-0.451232	3.05492	0.00248225	0.0291748	-1.92157	AC136475.3	antisense	up
ENSG00000155636.15	0.0978818	2.75796	3.0543	0.00248725	0.0291966	-1.63443	RBM45	protein_coding	up
ENSG00000109445.11	-0.133222	3.88416	-3.05402	0.00248951	0.0291966	-1.69397	ZNF330	protein_coding	down
ENSG00000113615.13	-0.10947	5.87767	-3.05386	0.00249075	0.0291966	-1.82411	SEC24A	protein_coding	down
ENSG00000271122.1	0.125315	2.62717	3.0521	0.00250496	0.0293371	-1.62908	AC018647.2	antisense	up
ENSG00000125651.14	-0.0990233	5.32346	-3.05128	0.00251151	0.0293878	-1.79984	GTF2F1	protein_coding	down
ENSG00000128000.16	0.123216	4.03018	3.04764	0.00254108	0.0297074	-1.74534	ZNF780B	protein_coding	up
ENSG00000140931.20	-0.0951506	6.13005	-3.04692	0.002547	0.0297503	-1.84823	CMTM3	protein_coding	down
ENSG00000250462.8	-0.123677	3.73854	-3.04481	0.0025643	0.0299259	-1.71752	LRRC37BP1	transcribed_unprocessed_pseudogene	down
ENSG00000168522.13	0.0754754	5.58647	3.04446	0.00256717	0.0299329	-1.84568	FNTA	protein_coding	up
ENSG00000096401.8	-0.0930816	5.83682	-3.04402	0.00257079	0.0299371	-1.84434	CDC5L	protein_coding	down
ENSG00000134970.14	-0.0786221	7.28364	-3.04369	0.00257349	0.0299371	-1.85933	TMED7	protein_coding	down
ENSG00000084090.13	-0.0888268	7.43274	-3.04359	0.00257433	0.0299371	-1.85822	STARD7	protein_coding	down
ENSG00000178467.18	0.0875515	3.86171	3.0407	0.00259833	0.0301896	-1.75187	P4HTM	protein_coding	up
ENSG00000129292.20	0.0951687	6.78351	3.03941	0.00260906	0.0302806	-1.88313	PHF20L1	protein_coding	up
ENSG00000184384.14	0.127753	5.93443	3.03911	0.00261157	0.0302806	-1.87549	MAML2	protein_coding	up
ENSG00000132330.17	0.122594	3.3372	3.03894	0.00261305	0.0302806	-1.71209	SCLY	protein_coding	up
ENSG00000125810.10	-0.149109	9.46219	-3.03828	0.00261854	0.0302954	-1.84423	CD93	protein_coding	down
ENSG00000147471.12	-0.0717562	5.69631	-3.03824	0.00261892	0.0302954	-1.85949	PLPBP	protein_coding	down
ENSG00000095564.14	-0.0930019	7.18933	-3.03784	0.00262222	0.0303071	-1.88425	BTAF1	protein_coding	down
ENSG00000177606.6	-0.342664	7.26562	-3.0359	0.00263856	0.0304461	-1.82104	JUN	protein_coding	down
ENSG00000108840.15	0.108596	6.2769	3.03575	0.00263985	0.0304461	-1.89284	HDAC5	protein_coding	up
ENSG00000169554.20	-0.115521	9.27421	-3.0356	0.00264117	0.0304461	-1.85723	ZEB2	protein_coding	down
ENSG00000108433.16	0.0781036	5.45614	3.03525	0.00264409	0.0304531	-1.87296	GOSR2	protein_coding	up
ENSG00000101160.14	-0.095678	8.32085	-3.03487	0.0026473	0.0304635	-1.87313	CTSZ	protein_coding	down
ENSG00000186854.11	0.398891	1.39854	3.03414	0.00265354	0.0305088	-1.68024	TRABD2A	protein_coding	up
ENSG00000126945.9	-0.0868282	6.12038	-3.03369	0.00265736	0.0305261	-1.87372	HNRNPH2	protein_coding	down
ENSG00000136504.12	0.0557556	6.82963	3.03313	0.00266208	0.0305537	-1.90507	KAT7	protein_coding	up
ENSG00000239713.9	0.121764	5.10846	3.03207	0.00267114	0.030631	-1.8613	APOBEC3G	protein_coding	up
ENSG00000168763.16	0.109268	4.80544	3.02968	0.00269162	0.0308391	-1.85404	CNNM3	protein_coding	up
ENSG00000109118.14	0.0777854	6.4559	3.02896	0.00269784	0.0308836	-1.90538	PHF12	protein_coding	up
ENSG00000204852.15	0.142917	2.4618	3.02727	0.00271251	0.0310246	-1.68907	TCTN1	protein_coding	up
ENSG00000100216.6	-0.0822189	5.27194	-3.02682	0.00271634	0.0310416	-1.86136	TOMM22	protein_coding	down
ENSG00000090382.6	-0.203267	13.298	-3.02614	0.0027223	0.0310828	-1.78673	LYZ	protein_coding	down
ENSG00000079263.19	0.184138	3.25756	3.02489	0.00273318	0.0311353	-1.7507	SP140	protein_coding	up
ENSG00000114023.15	0.12705	2.69144	3.0246	0.00273569	0.0311353	-1.71006	FAM162A	protein_coding	up
ENSG00000126759.13	-0.100288	8.13792	-3.02444	0.00273715	0.0311353	-1.90835	CFP	protein_coding	down
ENSG00000166454.10	-0.0673737	5.9444	-3.0242	0.00273918	0.0311353	-1.90308	ATMIN	protein_coding	down
ENSG00000256043.3	-0.105565	5.35161	-3.02408	0.00274024	0.0311353	-1.87152	CTSO	protein_coding	down
ENSG00000113575.10	-0.0945285	7.04625	-3.02399	0.00274106	0.0311353	-1.92155	PPP2CA	protein_coding	down
ENSG00000112473.18	-0.117875	4.35475	-3.02363	0.00274415	0.0311437	-1.82041	SLC39A7	protein_coding	down
ENSG00000131069.20	-0.0834075	5.24669	-3.02201	0.00275839	0.0312783	-1.882	ACSS2	protein_coding	down
ENSG00000163867.17	-0.0885773	5.76298	-3.02026	0.00277384	0.0314266	-1.91716	ZMYM6	protein_coding	down
ENSG00000169692.13	-0.124365	5.20131	-3.0194	0.00278148	0.0314801	-1.88472	AGPAT2	protein_coding	down
ENSG00000124813.22	0.121005	4.83821	3.01912	0.00278393	0.0314801	-1.88096	RUNX2	protein_coding	up
ENSG00000279500.1	0.253763	1.35873	3.01868	0.00278786	0.0314801	-1.7228	AC108704.2	TEC	up
ENSG00000123240.17	0.482008	1.94639	3.01865	0.00278811	0.0314801	-1.70483	OPTN	protein_coding	up
ENSG00000127311.9	0.179181	5.01879	3.01825	0.00279173	0.0314941	-1.90243	HELB	protein_coding	up
ENSG00000149639.15	-0.157552	5.65808	-3.01776	0.00279606	0.031516	-1.89883	SOGA1	protein_coding	down
ENSG00000173611.17	0.144333	3.36375	3.01744	0.0027989	0.0315211	-1.7771	SCAI	protein_coding	up
ENSG00000113621.14	-0.0733522	4.73312	-3.01653	0.00280703	0.0315612	-1.86471	TXNDC15	protein_coding	down
ENSG00000173281.5	0.206342	4.24321	3.01633	0.00280883	0.0315612	-1.84345	PPP1R3B	protein_coding	up
ENSG00000081692.12	0.104488	3.2409	3.01624	0.00280963	0.0315612	-1.76904	JMJD4	protein_coding	up
ENSG00000101335.10	0.752174	0.574745	3.01469	0.00282353	0.0316903	-1.81252	MYL9	protein_coding	up
ENSG00000121310.17	0.380349	1.50648	3.01434	0.00282666	0.0316985	-1.72666	ECHDC2	protein_coding	up
ENSG00000116791.14	0.449411	1.9856	3.01269	0.00284155	0.0318384	-1.72101	CRYZ	protein_coding	up
ENSG00000197969.13	0.144104	4.82464	3.01205	0.00284743	0.0318772	-1.90861	VPS13A	protein_coding	up
ENSG00000110955.9	-0.0654851	7.89029	-3.01145	0.00285285	0.0319108	-1.95069	ATP5F1B	protein_coding	down
ENSG00000147813.16	-0.147395	5.81615	-3.01094	0.00285743	0.031935	-1.92663	NAPRT	protein_coding	down
ENSG00000197299.12	0.1738	1.89664	3.01066	0.00286006	0.0319373	-1.72583	BLM	protein_coding	up
ENSG00000182511.12	-0.116455	6.87459	-3.00907	0.00287454	0.0320719	-1.955	FES	protein_coding	down
ENSG00000196757.8	0.129226	3.33525	3.00813	0.00288309	0.032122	-1.79757	ZNF700	protein_coding	up
ENSG00000173145.11	0.131591	2.86484	3.00805	0.0028839	0.032122	-1.7653	NOC3L	protein_coding	up
ENSG00000008988.9	-0.0984887	7.91584	-3.00745	0.0028894	0.0321336	-1.9525	RPS20	protein_coding	down
ENSG00000169895.6	-0.0928781	5.41987	-3.0074	0.0028898	0.0321336	-1.93238	SYAP1	protein_coding	down
ENSG00000277075.2	0.183844	3.67351	3.00663	0.0028969	0.0321853	-1.81498	HIST1H2AE	protein_coding	up
ENSG00000196363.9	-0.0869683	4.25133	-3.00581	0.00290451	0.0321964	-1.86894	WDR5	protein_coding	down
ENSG00000153827.13	-0.0650636	8.40064	-3.00566	0.00290589	0.0321964	-1.96051	TRIP12	protein_coding	down
ENSG00000164466.13	0.136972	3.41504	3.00555	0.00290686	0.0321964	-1.81293	SFXN1	protein_coding	up
ENSG00000182541.18	0.136014	5.35863	3.00546	0.00290765	0.0321964	-1.94851	LIMK2	protein_coding	up
ENSG00000245848.3	-0.128114	6.78768	-3.00464	0.00291525	0.0322382	-1.96432	CEBPA	protein_coding	down
ENSG00000162894.12	0.568149	1.64326	3.00438	0.00291766	0.0322382	-1.74747	FCMR	protein_coding	up
ENSG00000164828.18	-0.086504	5.84294	-3.00427	0.00291876	0.0322382	-1.95882	SUN1	protein_coding	down
ENSG00000185624.15	-0.0845765	7.36582	-3.00324	0.00292827	0.0323163	-1.97279	P4HB	protein_coding	down
ENSG00000100983.11	-0.083466	4.17118	-3.00257	0.0029345	0.0323171	-1.8678	GSS	protein_coding	down
ENSG00000067248.10	-0.0845569	5.16389	-3.00251	0.00293506	0.0323171	-1.92742	DHX29	protein_coding	down
ENSG00000087470.17	-0.0750995	5.84253	-3.00244	0.00293569	0.0323171	-1.96436	DNM1L	protein_coding	down
ENSG00000001561.7	0.257563	2.64254	3.00192	0.0029406	0.0323442	-1.77131	ENPP4	protein_coding	up
ENSG00000164687.11	0.192601	2.12618	3.0009	0.00295013	0.0324219	-1.75181	FABP5	protein_coding	up
ENSG00000144161.13	0.164956	2.163	2.99945	0.00296372	0.0325442	-1.75631	ZC3H8	protein_coding	up
ENSG00000283787.1	0.192203	4.19841	2.99802	0.00297718	0.0326616	-1.89223	PRR33	protein_coding	up
ENSG00000107362.13	-0.086997	4.14192	-2.99779	0.00297936	0.0326616	-1.88292	ABHD17B	protein_coding	down
ENSG00000211772.11	0.658249	1.19569	2.997	0.0029868	0.0326807	-1.78279	TRBC2	TR_C_gene	up
ENSG00000123159.16	0.222513	1.28078	2.99696	0.00298717	0.0326807	-1.78373	GIPC1	protein_coding	up
ENSG00000121797.10	-0.182704	2.79176	-2.99682	0.00298853	0.0326807	-1.77984	CCRL2	protein_coding	down
ENSG00000277775.1	0.211559	1.02856	2.99624	0.00299407	0.0327142	-1.79839	HIST1H3F	protein_coding	up
ENSG00000196459.14	0.11708	3.7344	2.99591	0.00299715	0.0327208	-1.86697	TRAPPC2	protein_coding	up
ENSG00000267080.5	0.145183	2.52947	2.99431	0.0030124	0.03286	-1.77766	ASB16-AS1	antisense	up
ENSG00000023909.10	0.162652	2.55291	2.99113	0.00304293	0.0331656	-1.79392	GCLM	protein_coding	up
ENSG00000102805.15	0.0885221	5.74183	2.98904	0.00306311	0.0333581	-2.01514	CLN5	protein_coding	up
ENSG00000116977.18	-0.0817124	7.24611	-2.98818	0.00307145	0.0333617	-2.02451	LGALS8	protein_coding	down
ENSG00000136940.13	-0.0987434	3.65491	-2.98807	0.0030725	0.0333617	-1.86908	PDCL	protein_coding	down
ENSG00000163050.17	-0.118594	5.73943	-2.98804	0.00307283	0.0333617	-2.00221	COQ8A	protein_coding	down
ENSG00000022267.17	0.422231	1.37893	2.98793	0.00307386	0.0333617	-1.80181	FHL1	protein_coding	up
ENSG00000171791.13	0.307651	3.57978	2.98679	0.00308497	0.0333617	-1.87752	BCL2	protein_coding	up
ENSG00000074696.13	0.122174	3.2509	2.98672	0.0030857	0.0333617	-1.84979	HACD3	protein_coding	up
ENSG00000163346.17	0.139334	5.5471	2.98667	0.00308612	0.0333617	-2.00901	PBXIP1	protein_coding	up
ENSG00000197258.5	-0.205686	1.40417	-2.98658	0.00308702	0.0333617	-1.80088	EIF4BP6	processed_pseudogene	down
ENSG00000130695.15	-0.113973	4.62613	-2.98653	0.00308751	0.0333617	-1.94518	CEP85	protein_coding	down
ENSG00000100348.10	-0.105994	4.43251	-2.98641	0.00308872	0.0333617	-1.93094	TXN2	protein_coding	down
ENSG00000154265.16	0.184769	2.76483	2.98506	0.00310189	0.0334766	-1.82363	ABCA5	protein_coding	up
ENSG00000137409.19	-0.0797077	6.49017	-2.98439	0.00310848	0.0335186	-2.03491	MTCH1	protein_coding	down
ENSG00000144747.17	-0.0643388	6.23335	-2.98397	0.0031126	0.0335186	-2.02677	TMF1	protein_coding	down
ENSG00000105708.9	0.211074	1.86428	2.98389	0.0031134	0.0335186	-1.79492	ZNF14	protein_coding	up
ENSG00000165240.20	0.109061	4.67942	2.98348	0.0031174	0.0335342	-1.97317	ATP7A	protein_coding	up
ENSG00000113649.11	-0.0614364	5.93483	-2.98246	0.00312748	0.033603	-2.03198	TCERG1	protein_coding	down
ENSG00000197114.11	-0.110491	3.91597	-2.98232	0.00312888	0.033603	-1.894	ZGPAT	protein_coding	down
ENSG00000211460.12	-0.071773	5.46415	-2.98089	0.00314302	0.0337225	-2.00097	TSN	protein_coding	down
ENSG00000137055.15	-0.0793346	5.29584	-2.98059	0.00314601	0.0337225	-2.00581	PLAA	protein_coding	down
ENSG00000104093.13	-0.106244	9.21086	-2.98042	0.00314767	0.0337225	-2.01052	DMXL2	protein_coding	down
ENSG00000160613.12	0.0697026	6.44151	2.98008	0.0031511	0.0337319	-2.0538	PCSK7	protein_coding	up
ENSG00000116514.16	0.135463	5.75718	2.97921	0.00315972	0.0337716	-2.04042	RNF19B	protein_coding	up
ENSG00000117614.10	-0.0856833	5.83905	-2.97897	0.00316208	0.0337716	-2.01874	SYF2	protein_coding	down
ENSG00000135930.14	-0.0694841	5.9517	-2.97893	0.00316249	0.0337716	-2.03573	EIF4E2	protein_coding	down
ENSG00000026508.18	-0.123818	10.0689	-2.97861	0.00316576	0.0337792	-1.99804	CD44	protein_coding	down
ENSG00000088854.12	-0.0965695	4.72152	-2.97817	0.00317011	0.0337983	-1.97799	C20orf194	protein_coding	down
ENSG00000117036.12	-0.109399	6.02229	-2.97768	0.00317505	0.0338237	-2.04322	ETV3	protein_coding	down
ENSG00000169189.17	0.130888	3.61775	2.97637	0.00318819	0.0338789	-1.90182	NSMCE1	protein_coding	up
ENSG00000162836.12	0.20529	1.92597	2.9762	0.00318983	0.0338789	-1.81414	ACP6	protein_coding	up
ENSG00000184445.12	0.0806573	3.8437	2.97605	0.00319143	0.0338789	-1.92867	KNTC1	protein_coding	up
ENSG00000274020.3	0.140394	2.78976	2.97569	0.003195	0.0338789	-1.84569	LINC01138	processed_transcript	up
ENSG00000136240.10	-0.0777916	5.64001	-2.97517	0.00320024	0.0338789	-2.03576	KDELR2	protein_coding	down
ENSG00000172530.20	0.129625	4.65722	2.97493	0.00320266	0.0338789	-1.99861	BANP	protein_coding	up
ENSG00000134955.11	-0.152412	6.06864	-2.97471	0.00320488	0.0338789	-2.03614	SLC37A2	protein_coding	down
ENSG00000274290.2	0.219539	2.24177	2.97464	0.00320556	0.0338789	-1.82442	HIST1H2BE	protein_coding	up
ENSG00000175193.13	-0.10639	5.13467	-2.97464	0.00320563	0.0338789	-1.99506	PARL	protein_coding	down
ENSG00000210082.2	-0.648864	7.77616	-2.97461	0.00320591	0.0338789	-2.00677	MT-RNR2	Mt_rRNA	down
ENSG00000168214.20	-0.0929508	7.49615	-2.97373	0.00321477	0.0339454	-2.06469	RBPJ	protein_coding	down
ENSG00000113407.13	-0.0765826	5.04616	-2.97331	0.00321908	0.0339637	-1.99675	TARS	protein_coding	down
ENSG00000166224.16	-0.0994025	6.22753	-2.973	0.00322225	0.0339701	-2.05891	SGPL1	protein_coding	down
ENSG00000155099.8	0.105561	4.8008	2.97207	0.00323171	0.0340243	-2.01558	PIP4P2	protein_coding	up
ENSG00000165669.14	-0.059638	5.63503	-2.97198	0.00323255	0.0340243	-2.03945	FAM204A	protein_coding	down
ENSG00000125779.22	0.0811206	5.82372	2.97168	0.00323566	0.0340299	-2.0557	PANK2	protein_coding	up
ENSG00000230606.10	0.327743	0.344966	2.97111	0.00324148	0.0340639	-1.94519	AC092683.1	lincRNA	up
ENSG00000235453.10	0.13993	2.20853	2.97053	0.0032474	0.034099	-1.83274	SMIM27	protein_coding	up
ENSG00000146729.10	-0.0818543	5.84913	-2.9698	0.00325491	0.0341372	-2.05173	NIPSNAP2	protein_coding	down
ENSG00000175387.16	0.0613398	7.42396	2.96959	0.00325698	0.0341372	-2.07696	SMAD2	protein_coding	up
ENSG00000100614.18	0.091048	6.68591	2.96939	0.00325902	0.0341372	-2.08293	PPM1A	protein_coding	up
ENSG00000121316.11	-0.145009	8.62267	-2.96916	0.00326145	0.0341372	-2.05505	PLBD1	protein_coding	down
ENSG00000204420.9	0.55332	2.49622	2.96891	0.00326397	0.0341372	-1.84434	MPIG6B	protein_coding	up
ENSG00000167005.14	-0.0530271	6.18296	-2.96841	0.00326912	0.034164	-2.06787	NUDT21	protein_coding	down
ENSG00000152240.13	-0.120269	2.71004	-2.96797	0.00327364	0.0341842	-1.85411	HAUS1	protein_coding	down
ENSG00000023902.14	-0.104981	7.78876	-2.96618	0.0032921	0.03434	-2.07834	PLEKHO1	protein_coding	down
ENSG00000166411.14	-0.0964097	5.24836	-2.96602	0.00329377	0.03434	-2.03469	IDH3A	protein_coding	down
ENSG00000162129.13	-0.100277	5.91805	-2.96445	0.00331009	0.0344829	-2.06773	CLPB	protein_coding	down
ENSG00000135070.15	0.118034	4.39761	2.96331	0.003322	0.0345797	-2.00749	ISCA1	protein_coding	up
ENSG00000182923.17	0.12483	4.75654	2.96269	0.0033285	0.0346201	-2.03799	CEP63	protein_coding	up
ENSG00000273703.1	0.458753	-1.6574	2.96232	0.00333232	0.0346325	-2.46774	HIST1H2BM	protein_coding	up
ENSG00000164733.21	-0.132557	9.25739	-2.96157	0.00334023	0.0346874	-2.06492	CTSB	protein_coding	down
ENSG00000101474.12	0.141918	5.43164	2.96038	0.00335267	0.0347441	-2.07958	APMAP	protein_coding	up
ENSG00000177119.16	-0.0890689	7.51334	-2.96028	0.0033538	0.0347441	-2.09352	ANO6	protein_coding	down
ENSG00000173890.17	-0.191444	4.54077	-2.96023	0.00335429	0.0347441	-2.01448	GPR160	protein_coding	down
ENSG00000128524.5	-0.148533	5.92137	-2.9598	0.00335877	0.0347441	-2.08621	ATP6V1F	protein_coding	down
ENSG00000250151.9	0.15554	3.31467	2.9598	0.00335885	0.0347441	-1.92387	ARPC4-TTLL3	protein_coding	up
ENSG00000167986.13	-0.0891943	7.06932	-2.95888	0.00336856	0.0348172	-2.10449	DDB1	protein_coding	down
ENSG00000196549.10	0.519653	3.35739	2.95847	0.00337285	0.0348343	-1.92089	MME	protein_coding	up
ENSG00000166200.15	-0.104234	6.06394	-2.95581	0.00340112	0.0350988	-2.08314	COPS2	protein_coding	down
ENSG00000135503.13	-0.123123	5.2845	-2.95398	0.0034207	0.0352634	-2.07507	ACVR1B	protein_coding	down
ENSG00000214309.5	0.226154	-0.0114776	2.95382	0.00342241	0.0352634	-2.03593	MBLAC1	protein_coding	up
ENSG00000072952.18	0.186232	4.38508	2.95338	0.00342713	0.0352844	-2.03465	MRVI1	protein_coding	up
ENSG00000198918.8	-0.152634	7.68662	-2.95231	0.00343863	0.0353534	-2.09268	RPL39	protein_coding	down
ENSG00000140396.13	0.0612231	7.41123	2.95226	0.00343919	0.0353534	-2.12773	NCOA2	protein_coding	up
ENSG00000059758.8	0.0936959	4.94581	2.95201	0.00344187	0.0353535	-2.08039	CDK17	protein_coding	up
ENSG00000285976.1	-0.104365	6.75192	-2.95159	0.00344644	0.0353729	-2.11951	AL135905.2	protein_coding	down
ENSG00000142102.15	0.183615	5.15867	2.95124	0.00345021	0.0353771	-2.09096	PGGHG	protein_coding	up
ENSG00000274001.1	-0.418534	-1.27027	-2.95105	0.00345221	0.0353771	-2.39904	AL512506.1	sense_intronic	down
ENSG00000139722.7	0.108188	5.375	2.95025	0.0034609	0.0354387	-2.10329	VPS37B	protein_coding	up
ENSG00000163960.12	-0.0842512	6.71227	-2.94923	0.00347199	0.0355243	-2.1363	UBXN7	protein_coding	down
ENSG00000087502.18	0.0932255	4.42923	2.94883	0.00347635	0.0355243	-2.0466	ERGIC2	protein_coding	up
ENSG00000183935.5	-0.148824	3.79518	-2.94874	0.00347734	0.0355243	-1.98008	HTR7P1	transcribed_processed_pseudogene	down
ENSG00000149485.18	-0.1955	5.21951	-2.94817	0.00348349	0.0355322	-2.07251	FADS1	protein_coding	down
ENSG00000095370.20	0.0905125	6.43541	2.94817	0.0034835	0.0355322	-2.13374	SH2D3C	protein_coding	up
ENSG00000157916.20	0.0592479	5.70512	2.94681	0.00349836	0.0356562	-2.11826	RER1	protein_coding	up
ENSG00000079257.8	0.214579	0.990176	2.94621	0.003505	0.0356963	-1.92756	LXN	protein_coding	up
ENSG00000184216.14	-0.10318	6.40945	-2.94448	0.003524	0.0358622	-2.13287	IRAK1	protein_coding	down
ENSG00000259699.2	0.300975	-0.0188507	2.94413	0.00352781	0.0358733	-2.08841	HMGB1P8	processed_pseudogene	up
ENSG00000018699.13	0.130399	2.91179	2.94359	0.00353379	0.0358988	-1.93987	TTC27	protein_coding	up
ENSG00000043462.12	0.0845527	7.53283	2.94341	0.00353576	0.0358988	-2.14942	LCP2	protein_coding	up
ENSG00000106635.8	-0.0779138	4.99206	-2.94282	0.00354234	0.035938	-2.09026	BCL7B	protein_coding	down
ENSG00000145569.6	-0.100914	6.15045	-2.94247	0.00354623	0.0359498	-2.1185	OTULINL	protein_coding	down
ENSG00000100226.16	0.0804168	6.3208	2.94212	0.00355005	0.035958	-2.15409	GTPBP1	protein_coding	up
ENSG00000104142.11	-0.0763056	5.26128	-2.9419	0.00355248	0.035958	-2.10892	VPS18	protein_coding	down
ENSG00000089876.11	-0.103193	3.83734	-2.9411	0.00356139	0.0360205	-2.00598	DHX32	protein_coding	down
ENSG00000196605.7	0.147392	1.56176	2.94073	0.00356557	0.0360352	-1.90825	ZNF846	protein_coding	up
ENSG00000106948.16	0.0997069	8.53414	2.93965	0.00357755	0.036126	-2.14268	AKNA	protein_coding	up
ENSG00000236567.2	0.267186	0.927148	2.93943	0.00358003	0.036126	-1.94855	TCF3P1	processed_pseudogene	up
ENSG00000111540.16	0.102742	6.72944	2.93901	0.00358468	0.0361453	-2.15979	RAB5B	protein_coding	up
ENSG00000152127.9	0.115205	5.39826	2.93869	0.00358826	0.0361538	-2.14132	MGAT5	protein_coding	up
ENSG00000113300.12	-0.0867026	5.91983	-2.93823	0.00359346	0.0361786	-2.14878	CNOT6	protein_coding	down
ENSG00000156471.12	-0.0744077	6.57975	-2.93781	0.00359819	0.0361858	-2.15591	PTDSS1	protein_coding	down
ENSG00000172794.20	0.152127	5.54321	2.93768	0.00359967	0.0361858	-2.15221	RAB37	protein_coding	up
ENSG00000246263.2	0.149278	2.98925	2.93667	0.00361103	0.0362724	-1.964	UBR5-AS1	antisense	up
ENSG00000205339.10	-0.0887588	6.69862	-2.93641	0.00361393	0.036274	-2.15711	IPO7	protein_coding	down
ENSG00000104522.16	0.121468	4.03102	2.93493	0.00363066	0.03639	-2.0531	TSTA3	protein_coding	up
ENSG00000133943.20	0.137482	5.72088	2.9349	0.003631	0.03639	-2.15879	DGLUCY	protein_coding	up
ENSG00000186532.11	0.102445	3.65338	2.93131	0.00367186	0.0367558	-2.03492	SMYD4	protein_coding	up
ENSG00000134744.14	0.0995538	5.09246	2.93121	0.00367307	0.0367558	-2.14895	TUT4	protein_coding	up
ENSG00000198746.13	-0.102786	3.222	-2.93007	0.00368611	0.0368583	-1.98938	GPATCH3	protein_coding	down
ENSG00000243678.11	-0.10933	5.37299	-2.92658	0.0037264	0.0372118	-2.11581	NME2	protein_coding	down
ENSG00000108100.18	-0.071941	7.81322	-2.92652	0.0037271	0.0372118	-2.18834	CCNY	protein_coding	down
ENSG00000245937.7	0.174779	2.17003	2.92517	0.00374277	0.0373255	-1.94873	LINC01184	lincRNA	up
ENSG00000167562.12	0.123379	3.66007	2.925	0.00374471	0.0373255	-2.05126	ZNF701	protein_coding	up
ENSG00000168310.11	0.129605	6.16143	2.92469	0.00374837	0.0373255	-2.19619	IRF2	protein_coding	up
ENSG00000235944.8	0.151893	1.93474	2.92453	0.00375015	0.0373255	-1.94601	ZNF815P	transcribed_unprocessed_pseudogene	up
ENSG00000174695.10	-0.0972855	7.29771	-2.92432	0.00375263	0.0373255	-2.18638	TMEM167A	protein_coding	down
ENSG00000162747.11	0.723307	4.11727	2.92242	0.00377485	0.0374821	-2.04784	FCGR3B	protein_coding	up
ENSG00000182774.12	-0.113966	7.96808	-2.92237	0.00377545	0.0374821	-2.17434	RPS17	protein_coding	down
ENSG00000181800.5	0.158738	4.68835	2.92211	0.00377851	0.0374821	-2.12628	CELF2-AS1	antisense	up
ENSG00000214688.6	0.175492	3.47007	2.92201	0.00377973	0.0374821	-2.04356	C10orf105	protein_coding	up
ENSG00000171130.18	0.190381	2.52015	2.92145	0.00378629	0.0374936	-1.96768	ATP6V0E2	protein_coding	up
ENSG00000105122.13	0.0996208	5.37868	2.92143	0.00378657	0.0374936	-2.1843	RASAL3	protein_coding	up
ENSG00000205352.11	0.115514	6.69847	2.9203	0.00379987	0.0375971	-2.21322	PRR13	protein_coding	up
ENSG00000213654.10	0.0972873	7.48339	2.9198	0.0038057	0.0376265	-2.21342	GPSM3	protein_coding	up
ENSG00000121413.12	0.28271	1.61174	2.91778	0.00382973	0.0378358	-1.96387	ZSCAN18	protein_coding	up
ENSG00000266642.2	0.266461	0.756992	2.91718	0.00383689	0.0378491	-2.03063	AC024267.6	antisense	up
ENSG00000179630.11	-0.158018	3.37162	-2.91677	0.00384171	0.0378491	-2.02674	LACC1	protein_coding	down
ENSG00000197321.14	0.113649	6.12334	2.91649	0.00384504	0.0378491	-2.22572	SVIL	protein_coding	up
ENSG00000285106.1	0.224012	2.58514	2.91647	0.00384534	0.0378491	-1.98358	AC016831.7	lincRNA	up
ENSG00000125149.11	-0.107234	5.24276	-2.91646	0.00384541	0.0378491	-2.16854	C16orf70	protein_coding	down
ENSG00000143303.12	-0.0819148	3.87433	-2.91362	0.00387942	0.0381304	-2.08594	RRNAD1	protein_coding	down
ENSG00000070540.13	0.1304	4.60689	2.91359	0.00387977	0.0381304	-2.16069	WIPI1	protein_coding	up
ENSG00000133026.12	0.229822	2.32112	2.91291	0.00388798	0.0381826	-1.98213	MYH10	protein_coding	up
ENSG00000162227.8	-0.100504	3.12348	-2.91233	0.00389502	0.0382168	-2.02805	TAF6L	protein_coding	down
ENSG00000173402.11	-0.100218	4.74835	-2.91172	0.00390232	0.0382168	-2.14874	DAG1	protein_coding	down
ENSG00000123415.15	0.0949071	3.14668	2.91132	0.00390719	0.0382168	-2.0424	SMUG1	protein_coding	up
ENSG00000228903.7	0.24505	1.78441	2.91108	0.00391013	0.0382168	-1.97879	RASA4CP	transcribed_unprocessed_pseudogene	up
ENSG00000099910.17	0.096073	3.70207	2.91075	0.0039141	0.0382168	-2.09183	KLHL22	protein_coding	up
ENSG00000227195.10	0.406783	-1.3407	2.91064	0.00391549	0.0382168	-2.40564	MIR663AHG	processed_transcript	up
ENSG00000170677.6	-0.15793	4.0223	-2.91034	0.00391913	0.0382168	-2.09149	SOCS6	protein_coding	down
ENSG00000106479.11	0.107321	4.14625	2.91031	0.0039195	0.0382168	-2.13322	ZNF862	protein_coding	up
ENSG00000104903.4	0.142076	5.52886	2.91015	0.00392139	0.0382168	-2.21537	LYL1	protein_coding	up
ENSG00000067704.10	-0.0721928	5.88244	-2.91001	0.00392312	0.0382168	-2.20963	IARS2	protein_coding	down
ENSG00000197329.12	0.14231	6.99926	2.90977	0.00392599	0.0382168	-2.24727	PELI1	protein_coding	up
ENSG00000165655.17	-0.236903	3.78206	-2.90976	0.00392621	0.0382168	-2.05729	ZNF503	protein_coding	down
ENSG00000166164.15	-0.0662335	6.66627	-2.90851	0.00394134	0.0383358	-2.24975	BRD7	protein_coding	down
ENSG00000234292.3	0.317257	0.241038	2.90778	0.00395036	0.0383798	-2.12593	AC123595.1	lincRNA	up
ENSG00000196550.10	-0.216161	1.26109	-2.90767	0.00395168	0.0383798	-2.0114	FAM72A	protein_coding	down
ENSG00000161944.16	-0.217671	4.55453	-2.9065	0.00396599	0.0384905	-2.13348	ASGR2	protein_coding	down
ENSG00000168438.15	-0.0795355	5.98495	-2.90597	0.00397246	0.0384952	-2.2263	CDC40	protein_coding	down
ENSG00000009954.11	-0.092694	6.37212	-2.90586	0.00397385	0.0384952	-2.2477	BAZ1B	protein_coding	down
ENSG00000140319.10	-0.102357	6.18498	-2.90575	0.00397522	0.0384952	-2.2355	SRP14	protein_coding	down
ENSG00000015676.18	0.0764244	5.19131	2.9051	0.00398328	0.0385449	-2.22063	NUDCD3	protein_coding	up
ENSG00000247315.3	-0.100321	4.61083	-2.90439	0.00399203	0.0386013	-2.17795	ZCCHC3	protein_coding	down
ENSG00000135801.9	-0.065805	4.5953	-2.90407	0.00399589	0.0386103	-2.17675	TAF5L	protein_coding	down
ENSG00000187091.13	0.133058	2.64371	2.90293	0.00401009	0.0387193	-2.02603	PLCD1	protein_coding	up
ENSG00000078369.18	-0.0710634	8.50536	-2.90121	0.00403137	0.0388883	-2.24811	GNB1	protein_coding	down
ENSG00000198105.14	0.129491	2.06213	2.90104	0.00403349	0.0388883	-2.00758	ZNF248	protein_coding	up
ENSG00000081189.15	-0.125223	7.22485	-2.90068	0.00403809	0.0389042	-2.25233	MEF2C	protein_coding	down
ENSG00000072062.13	-0.0647947	7.34959	-2.89926	0.00405585	0.0390468	-2.26883	PRKACA	protein_coding	down
ENSG00000103148.15	0.193424	4.60675	2.89841	0.00406651	0.0391083	-2.16775	NPRL3	protein_coding	up
ENSG00000205208.5	-0.107089	2.79695	-2.8981	0.00407038	0.0391083	-2.03951	C4orf46	protein_coding	down
ENSG00000271964.1	0.34303	-0.774704	2.89793	0.00407251	0.0391083	-2.32459	AC090948.1	antisense	up
ENSG00000101574.15	0.143599	2.53178	2.8978	0.00407409	0.0391083	-2.03755	METTL4	protein_coding	up
ENSG00000143226.13	0.121873	9.08388	2.8946	0.00411451	0.0394676	-2.25321	FCGR2A	protein_coding	up
ENSG00000185418.16	0.117298	2.48309	2.8941	0.00412093	0.0395004	-2.04282	TARSL2	protein_coding	up
ENSG00000123405.14	0.135443	6.36517	2.89373	0.00412565	0.039517	-2.28411	NFE2	protein_coding	up
ENSG00000143862.8	-0.0852847	5.73984	-2.89222	0.00414484	0.039672	-2.26476	ARL8A	protein_coding	down
ENSG00000162385.11	-0.101975	3.49991	-2.89146	0.00415462	0.0397366	-2.11003	MAGOH	protein_coding	down
ENSG00000125485.17	0.122621	2.42379	2.89123	0.00415761	0.0397366	-2.04429	DDX31	protein_coding	up
ENSG00000123353.10	0.0817961	4.29211	2.88932	0.0041821	0.0399417	-2.20023	ORMDL2	protein_coding	up
ENSG00000122694.16	-0.0792423	7.84564	-2.88835	0.00419466	0.0400328	-2.29146	GLIPR2	protein_coding	down
ENSG00000241990.5	0.1772	0.564706	2.88747	0.00420607	0.0401126	-2.10621	PRR34-AS1	antisense	up
ENSG00000003402.20	0.0805311	8.4636	2.88645	0.00421919	0.0401868	-2.28903	CFLAR	protein_coding	up
ENSG00000104679.11	-0.0837502	3.51726	-2.88638	0.0042202	0.0401868	-2.12258	R3HCC1	protein_coding	down
ENSG00000057608.17	-0.075006	8.24305	-2.88598	0.00422537	0.0401868	-2.28463	GDI2	protein_coding	down
ENSG00000278952.1	-0.285797	0.58705	-2.88593	0.00422603	0.0401868	-2.13135	AP003068.4	TEC	down
ENSG00000278705.1	0.206384	2.63241	2.8851	0.00423677	0.0401885	-2.07528	HIST1H4B	protein_coding	up
ENSG00000169446.5	-0.0752828	6.06913	-2.88508	0.00423707	0.0401885	-2.29386	MMGT1	protein_coding	down
ENSG00000147548.17	0.0586988	7.21184	2.88504	0.00423763	0.0401885	-2.31348	NSD3	protein_coding	up
ENSG00000122406.13	-0.0780142	8.62588	-2.88498	0.00423838	0.0401885	-2.28308	RPL5	protein_coding	down
ENSG00000177337.7	0.269166	0.936095	2.88387	0.00425282	0.0402832	-2.08087	DLGAP1-AS1	antisense	up
ENSG00000109618.12	-0.0960958	4.12909	-2.88375	0.00425447	0.0402832	-2.19293	SEPSECS	protein_coding	down
ENSG00000140400.17	-0.140068	6.93968	-2.88335	0.00425964	0.0403033	-2.30711	MAN2C1	protein_coding	down
ENSG00000173041.12	0.165525	2.08094	2.88263	0.00426908	0.040339	-2.05508	ZNF680	protein_coding	up
ENSG00000171307.19	0.0829438	3.4283	2.8826	0.00426953	0.040339	-2.13702	ZDHHC16	protein_coding	up
ENSG00000165782.10	-0.0924983	4.74156	-2.88182	0.00427974	0.0404065	-2.2404	PIP4P1	protein_coding	down
ENSG00000160691.18	-0.0687092	5.7962	-2.88102	0.00429035	0.0404777	-2.30523	SHC1	protein_coding	down
ENSG00000172830.13	0.101222	3.51076	2.88014	0.00430199	0.0405511	-2.14793	SSH3	protein_coding	up
ENSG00000255587.9	-0.15169	4.45369	-2.8799	0.00430515	0.0405511	-2.21551	RAB44	protein_coding	down
ENSG00000229754.1	0.266685	4.16179	2.87973	0.00430734	0.0405511	-2.20456	CXCR2P1	transcribed_unprocessed_pseudogene	up
ENSG00000119318.13	-0.0793304	7.20364	-2.87899	0.0043171	0.040614	-2.31937	RAD23B	protein_coding	down
ENSG00000115486.12	-0.0851464	5.15207	-2.87856	0.0043229	0.0406395	-2.28511	GGCX	protein_coding	down
ENSG00000146776.14	0.0964943	4.84161	2.87802	0.00433	0.0406773	-2.25708	ATXN7L1	protein_coding	up
ENSG00000203497.2	0.235606	0.826996	2.87683	0.0043459	0.0406955	-2.11109	PDCD4-AS1	antisense	up
ENSG00000081014.11	-0.0948938	4.72447	-2.87682	0.00434608	0.0406955	-2.24848	AP4E1	protein_coding	down
ENSG00000048740.18	0.078842	8.24307	2.87648	0.00435061	0.0406955	-2.32141	CELF2	protein_coding	up
ENSG00000181788.4	0.145886	5.62084	2.87646	0.00435088	0.0406955	-2.32142	SIAH2	protein_coding	up
ENSG00000007202.15	-0.0925105	7.81793	-2.87643	0.00435124	0.0406955	-2.3238	KIAA0100	protein_coding	down
ENSG00000177054.14	0.114832	2.97679	2.8764	0.00435166	0.0406955	-2.12195	ZDHHC13	protein_coding	up
ENSG00000171310.11	0.0877756	6.69511	2.87617	0.00435466	0.0406955	-2.33962	CHST11	protein_coding	up
ENSG00000134046.12	-0.0955954	7.51378	-2.87603	0.0043566	0.0406955	-2.32356	MBD2	protein_coding	down
ENSG00000125740.14	-0.344313	7.73239	-2.87573	0.0043606	0.0407041	-2.26152	FOSB	protein_coding	down
ENSG00000100227.18	-0.0919846	6.07241	-2.87483	0.00437266	0.0407878	-2.32948	POLDIP3	protein_coding	down
ENSG00000118971.8	0.20665	5.33125	2.87413	0.00438211	0.0408471	-2.31437	CCND2	protein_coding	up
ENSG00000176396.10	-0.0964266	3.39951	-2.87327	0.00439359	0.0409252	-2.1517	EID2	protein_coding	down
ENSG00000074706.13	0.168389	5.46505	2.87284	0.00439948	0.0409512	-2.32087	IPCEF1	protein_coding	up
ENSG00000087095.13	0.063755	4.235	2.87254	0.00440349	0.0409596	-2.23939	NLK	protein_coding	up
ENSG00000172081.14	0.0938317	8.13562	2.87204	0.0044103	0.040994	-2.32547	MOB3A	protein_coding	up
ENSG00000228492.2	0.223005	1.77664	2.87137	0.00441934	0.0410492	-2.0763	RAB11FIP1P1	processed_pseudogene	up
ENSG00000181192.12	0.0899356	5.02347	2.87	0.00443798	0.0411933	-2.30492	DHTKD1	protein_coding	up
ENSG00000095002.14	0.163821	2.54695	2.86955	0.00444407	0.0412208	-2.10993	MSH2	protein_coding	up
ENSG00000111906.17	0.226467	2.77892	2.86791	0.00446641	0.041399	-2.12664	HDDC2	protein_coding	up
ENSG00000211584.14	0.135434	4.35163	2.86747	0.00447244	0.0414258	-2.24889	SLC48A1	protein_coding	up
ENSG00000120992.18	-0.0696167	6.51169	-2.86652	0.00448551	0.0415177	-2.34539	LYPLA1	protein_coding	down
ENSG00000128311.14	0.122158	2.99846	2.86613	0.0044909	0.0415384	-2.14385	TST	protein_coding	up
ENSG00000130821.16	0.321763	2.53759	2.86425	0.00451679	0.0417487	-2.11095	SLC6A8	protein_coding	up
ENSG00000162819.12	-0.0600091	6.79921	-2.86387	0.00452208	0.0417683	-2.36394	BROX	protein_coding	down
ENSG00000124098.10	0.186314	5.85274	2.86222	0.0045449	0.0419497	-2.36548	FAM210B	protein_coding	up
ENSG00000180340.6	-0.169997	3.6077	-2.86048	0.00456912	0.0421438	-2.196	FZD2	protein_coding	down
ENSG00000196372.13	-0.123025	4.41754	-2.85991	0.0045771	0.042188	-2.26737	ASB13	protein_coding	down
ENSG00000213648.10	-0.244907	4.32587	-2.85953	0.00458247	0.0421957	-2.22662	SULT1A4	protein_coding	down
ENSG00000105866.15	0.114222	4.1849	2.85939	0.00458434	0.0421957	-2.27537	SP4	protein_coding	up
ENSG00000092201.10	-0.0672212	6.13754	-2.85895	0.0045906	0.0422021	-2.36736	SUPT16H	protein_coding	down
ENSG00000100097.12	-0.142313	7.44124	-2.85889	0.00459142	0.0422021	-2.36013	LGALS1	protein_coding	down
ENSG00000104880.17	0.0904697	5.65169	2.85651	0.00462498	0.0424809	-2.36868	ARHGEF18	protein_coding	up
ENSG00000115053.16	-0.10488	7.09164	-2.85616	0.00462992	0.0424967	-2.38078	NCL	protein_coding	down
ENSG00000099875.14	0.101635	7.66163	2.85426	0.00465674	0.042708	-2.39098	MKNK2	protein_coding	up
ENSG00000213190.3	0.144829	4.64969	2.85408	0.00465941	0.042708	-2.31672	MLLT11	protein_coding	up
ENSG00000170949.17	0.121154	4.4932	2.85345	0.00466836	0.0427271	-2.31347	ZNF160	protein_coding	up
ENSG00000105204.14	0.119578	3.78386	2.85331	0.00467025	0.0427271	-2.24052	DYRK1B	protein_coding	up
ENSG00000232098.3	0.191621	1.3766	2.85282	0.00467733	0.0427271	-2.12846	AC012313.1	lincRNA	up
ENSG00000197943.10	0.0803973	6.91637	2.85267	0.00467948	0.0427271	-2.40224	PLCG2	protein_coding	up
ENSG00000167792.12	-0.0680523	5.21207	-2.8526	0.0046804	0.0427271	-2.34558	NDUFV1	protein_coding	down
ENSG00000134996.11	0.0937779	5.91686	2.85257	0.00468091	0.0427271	-2.37247	OSTF1	protein_coding	up
ENSG00000213614.9	-0.0870092	6.29173	-2.85218	0.00468641	0.0427477	-2.38848	HEXA	protein_coding	down
ENSG00000162241.12	0.12255	3.65722	2.85189	0.0046906	0.0427563	-2.24066	SLC25A45	protein_coding	up
ENSG00000111785.20	0.101516	2.8753	2.85118	0.00470074	0.0428192	-2.17822	RIC8B	protein_coding	up
ENSG00000156411.9	-0.0906022	5.01402	-2.85066	0.00470819	0.0428575	-2.31679	ATP5MPL	protein_coding	down
ENSG00000179222.17	0.145559	2.56158	2.85032	0.00471304	0.0428721	-2.14984	MAGED1	protein_coding	up
ENSG00000157800.18	0.154815	3.35702	2.84977	0.00472096	0.0429146	-2.22436	SLC37A3	protein_coding	up
ENSG00000012660.14	0.0798299	7.27183	2.84925	0.00472844	0.0429437	-2.41009	ELOVL5	protein_coding	up
ENSG00000187147.18	-0.0732571	5.28627	-2.8491	0.00473068	0.0429437	-2.36477	RNF220	protein_coding	down
ENSG00000256664.1	-0.466108	-0.124396	-2.84764	0.00475175	0.0431054	-2.25576	AC025423.2	processed_pseudogene	down
ENSG00000182173.13	0.188039	2.14308	2.84706	0.0047602	0.0431524	-2.1446	TSEN54	protein_coding	up
ENSG00000163162.8	0.115323	7.4378	2.84611	0.00477388	0.0432467	-2.41304	RNF149	protein_coding	up
ENSG00000130038.9	0.115887	4.49319	2.84578	0.0047788	0.0432616	-2.33423	CRACR2A	protein_coding	up
ENSG00000106723.17	-0.113171	5.23334	-2.84484	0.00479241	0.043355	-2.36988	SPIN1	protein_coding	down
ENSG00000100796.17	-0.0827676	6.98614	-2.84423	0.00480142	0.0433807	-2.41771	PPP4R3A	protein_coding	down
ENSG00000153922.10	-0.0971768	7.29581	-2.8442	0.00480182	0.0433807	-2.41548	CHD1	protein_coding	down
ENSG00000275342.4	0.218248	2.16425	2.84394	0.00480567	0.0433858	-2.15102	PRAG1	protein_coding	up
ENSG00000104325.7	0.0970476	4.97995	2.84301	0.00481921	0.0434783	-2.36407	DECR1	protein_coding	up
ENSG00000162191.13	-0.0990848	5.69921	-2.84222	0.00483085	0.0435332	-2.39529	UBXN1	protein_coding	down
ENSG00000131127.14	0.118793	4.30437	2.84215	0.00483189	0.0435332	-2.32977	ZNF141	protein_coding	up
ENSG00000186818.12	-0.156866	5.39822	-2.84191	0.00483531	0.0435343	-2.36345	LILRB4	protein_coding	down
ENSG00000279447.1	0.231131	1.03184	2.84165	0.00483918	0.0435394	-2.17299	AL118508.3	TEC	up
ENSG00000107554.17	-0.157137	4.8522	-2.84116	0.00484648	0.0435754	-2.35033	DNMBP	protein_coding	down
ENSG00000117480.16	-0.159154	3.4765	-2.84091	0.00485007	0.043578	-2.23848	FAAH	protein_coding	down
ENSG00000198786.2	-0.188435	10.5965	-2.83952	0.00487069	0.043726	-2.3521	MT-ND5	protein_coding	down
ENSG00000115808.12	-0.0587712	6.60109	-2.83935	0.00487317	0.043726	-2.43446	STRN	protein_coding	down
ENSG00000172239.14	-0.086085	4.5894	-2.8379	0.00489472	0.0438896	-2.33597	PAIP1	protein_coding	down
ENSG00000143554.14	-0.119634	5.74247	-2.83758	0.00489941	0.0439018	-2.40351	SLC27A3	protein_coding	down
ENSG00000166855.9	-0.0690047	5.52604	-2.83729	0.00490382	0.0439115	-2.40286	CLPX	protein_coding	down
ENSG00000088970.16	0.114976	3.66199	2.83646	0.00491614	0.043992	-2.28608	KIZ	protein_coding	up
ENSG00000143621.17	-0.085324	5.8955	-2.8344	0.00494702	0.0442383	-2.42048	ILF2	protein_coding	down
ENSG00000101596.15	0.126173	8.38665	2.83354	0.00495988	0.0443233	-2.43057	SMCHD1	protein_coding	up
ENSG00000200312.1	0.293145	6.15746	2.83326	0.0049641	0.0443309	-2.44302	RN7SKP255	misc_RNA	up
ENSG00000132846.6	-0.188578	3.48561	-2.8328	0.00497106	0.0443631	-2.25035	ZBED3	protein_coding	down
ENSG00000138078.15	0.109866	4.78919	2.8317	0.00498769	0.0444814	-2.38506	PREPL	protein_coding	up
ENSG00000071537.14	-0.0619172	7.3419	-2.83018	0.00501075	0.0446053	-2.45339	SEL1L	protein_coding	down
ENSG00000107566.14	-0.116137	4.85743	-2.83001	0.00501336	0.0446053	-2.38732	ERLIN1	protein_coding	down
ENSG00000141562.18	0.0966289	4.90209	2.8299	0.00501505	0.0446053	-2.40766	NARF	protein_coding	up
ENSG00000113971.20	0.108336	4.14271	2.82989	0.0050151	0.0446053	-2.34711	NPHP3	protein_coding	up
ENSG00000123575.9	-0.0577885	6.01312	-2.82946	0.00502162	0.0446227	-2.44597	FAM199X	protein_coding	down
ENSG00000280649.2	0.177695	2.14293	2.82888	0.00503046	0.0446227	-2.18906	AC245100.8	TEC	up
ENSG00000162881.6	0.178961	2.38845	2.82887	0.00503067	0.0446227	-2.19476	OXER1	protein_coding	up
ENSG00000214413.8	0.0793632	5.24579	2.8287	0.00503329	0.0446227	-2.43354	BBIP1	protein_coding	up
ENSG00000013561.18	0.117856	4.50819	2.82846	0.00503689	0.0446227	-2.37875	RNF14	protein_coding	up
ENSG00000114302.16	-0.0806801	6.13873	-2.82843	0.00503734	0.0446227	-2.45025	PRKAR2A	protein_coding	down
ENSG00000070214.16	-0.107017	6.33717	-2.82788	0.00504579	0.0446524	-2.44414	SLC44A1	protein_coding	down
ENSG00000244754.8	0.0720001	7.51442	2.82777	0.00504745	0.0446524	-2.46121	N4BP2L2	protein_coding	up
ENSG00000165280.16	-0.0854748	7.14901	-2.82744	0.00505255	0.0446675	-2.46091	VCP	protein_coding	down
ENSG00000104763.19	-0.0906641	9.39389	-2.82699	0.00505941	0.0446982	-2.42324	ASAH1	protein_coding	down
ENSG00000134516.16	-0.0684901	9.22011	-2.82594	0.00507557	0.044811	-2.43301	DOCK2	protein_coding	down
ENSG00000169682.18	-0.114553	5.47632	-2.82555	0.00508157	0.044834	-2.42184	SPNS1	protein_coding	down
ENSG00000132549.18	0.074962	7.28979	2.82469	0.00509471	0.0449199	-2.47416	VPS13B	protein_coding	up
ENSG00000181789.14	-0.0757004	6.32435	-2.82437	0.00509962	0.0449332	-2.46632	COPG1	protein_coding	down
ENSG00000136371.10	0.150721	3.16739	2.82366	0.00511062	0.0450001	-2.272	MTHFS	protein_coding	up
ENSG00000116668.13	0.101744	3.41684	2.82318	0.00511814	0.0450362	-2.29836	SWT1	protein_coding	up
ENSG00000156521.14	0.0953336	3.48642	2.82254	0.00512809	0.0450937	-2.30136	TYSND1	protein_coding	up
ENSG00000151746.14	0.202485	1.8609	2.8222	0.00513326	0.0451092	-2.19679	BICD1	protein_coding	up
ENSG00000278330.1	0.202054	4.79623	2.82196	0.00513707	0.0451126	-2.42404	AC018529.2	antisense	up
ENSG00000132432.14	0.117727	2.45909	2.81785	0.0052013	0.0456462	-2.22796	SEC61G	protein_coding	up
ENSG00000143507.18	-0.131872	4.53679	-2.81722	0.00521112	0.0457021	-2.38677	DUSP10	protein_coding	down
ENSG00000105518.14	-0.102231	4.59199	-2.81695	0.00521543	0.0457095	-2.37889	TMEM205	protein_coding	down
ENSG00000076003.5	0.162227	2.2245	2.81551	0.00523821	0.0458513	-2.22323	MCM6	protein_coding	up
ENSG00000233223.2	-0.248105	0.227062	-2.81548	0.00523856	0.0458513	-2.35378	AC016876.1	antisense	down
ENSG00000163527.9	-0.0614489	7.51623	-2.81519	0.00524326	0.045862	-2.48618	STT3B	protein_coding	down
ENSG00000234332.1	0.291834	-0.501733	2.81478	0.00524975	0.0458884	-2.4261	BCAS2P2	processed_pseudogene	up
ENSG00000102390.10	-0.145943	1.82892	-2.81441	0.00525561	0.0459092	-2.21432	PBDC1	protein_coding	down
ENSG00000124228.14	-0.0772678	5.08387	-2.81396	0.00526272	0.0459206	-2.44335	DDX27	protein_coding	down
ENSG00000076604.15	0.175326	2.17872	2.81389	0.00526387	0.0459206	-2.22053	TRAF4	protein_coding	up
ENSG00000069943.10	0.10753	3.94312	2.81313	0.00527591	0.0459952	-2.37344	PIGB	protein_coding	up
ENSG00000088826.18	0.289735	1.90821	2.81206	0.00529302	0.0460986	-2.22083	SMOX	protein_coding	up
ENSG00000104267.10	0.306544	2.02758	2.81195	0.00529475	0.0460986	-2.2238	CA2	protein_coding	up
ENSG00000165629.20	-0.094707	6.06829	-2.81134	0.00530453	0.0461532	-2.47103	ATP5F1C	protein_coding	down
ENSG00000124299.14	-0.0849615	5.28859	-2.81082	0.00531286	0.0461953	-2.45194	PEPD	protein_coding	down
ENSG00000268849.5	-0.135492	3.0476	-2.81036	0.00532025	0.0462291	-2.27733	SIGLEC22P	transcribed_unprocessed_pseudogene	down
ENSG00000162413.16	0.12629	5.53407	2.80978	0.00532954	0.0462794	-2.49412	KLHL21	protein_coding	up
ENSG00000197157.11	-0.0755347	7.14719	-2.80953	0.00533354	0.0462837	-2.50352	SND1	protein_coding	down
ENSG00000125991.19	-0.104815	6.33297	-2.809	0.00534199	0.0463265	-2.50428	ERGIC3	protein_coding	down
ENSG00000100652.5	-0.189637	2.49932	-2.80858	0.00534888	0.0463497	-2.25239	SLC10A1	protein_coding	down
ENSG00000137288.10	0.154455	2.51097	2.80816	0.00535562	0.0463497	-2.26205	UQCC2	protein_coding	up
ENSG00000125447.17	-0.0510982	6.27867	-2.80798	0.00535851	0.0463497	-2.5073	GGA3	protein_coding	down
ENSG00000101040.19	0.118592	4.98883	2.80788	0.00536014	0.0463497	-2.46712	ZMYND8	protein_coding	up
ENSG00000065485.20	-0.14676	2.5755	-2.80775	0.00536223	0.0463497	-2.25478	PDIA5	protein_coding	down
ENSG00000067606.17	0.197954	1.10658	2.80722	0.0053708	0.0463934	-2.24727	PRKCZ	protein_coding	up
ENSG00000082805.20	-0.0900016	5.61653	-2.80586	0.00539275	0.0465404	-2.49439	ERC1	protein_coding	down
ENSG00000162909.18	-0.093639	8.15869	-2.80573	0.00539486	0.0465404	-2.50662	CAPN2	protein_coding	down
ENSG00000133193.12	0.126293	5.43978	2.80546	0.0053993	0.0465483	-2.50039	FAM104A	protein_coding	up
ENSG00000138796.16	0.104081	3.02913	2.80516	0.00540426	0.0465606	-2.30728	HADH	protein_coding	up
ENSG00000123737.12	0.0769444	3.62824	2.80453	0.00541449	0.0466183	-2.35861	EXOSC9	protein_coding	up
ENSG00000164961.16	-0.0685221	5.91323	-2.80399	0.00542322	0.0466455	-2.50855	WASHC5	protein_coding	down
ENSG00000152291.14	-0.0799675	9.2703	-2.80365	0.00542881	0.0466455	-2.49228	TGOLN2	protein_coding	down
ENSG00000105058.12	-0.059621	6.19526	-2.80333	0.005434	0.0466455	-2.50959	FAM32A	protein_coding	down
ENSG00000114978.18	-0.0632239	9.16997	-2.80332	0.00543417	0.0466455	-2.49216	MOB1A	protein_coding	down
ENSG00000011304.20	-0.0670735	7.39333	-2.80325	0.00543532	0.0466455	-2.52634	PTBP1	protein_coding	down
ENSG00000005156.11	0.0591146	5.50146	2.80167	0.00546128	0.0468378	-2.51527	LIG3	protein_coding	up
ENSG00000136710.10	-0.077798	4.492	-2.80044	0.00548148	0.0469806	-2.43366	CCDC115	protein_coding	down
ENSG00000117602.12	0.151185	5.21214	2.79991	0.00549027	0.0470254	-2.50814	RCAN3	protein_coding	up
ENSG00000122741.16	0.065749	5.23662	2.79903	0.00550474	0.047099	-2.50797	DCAF10	protein_coding	up
ENSG00000154743.17	0.123695	1.94684	2.79896	0.00550601	0.047099	-2.25563	TSEN2	protein_coding	up
ENSG00000141385.9	-0.0751349	4.81576	-2.79838	0.00551556	0.047144	-2.45419	AFG3L2	protein_coding	down
ENSG00000204257.15	-0.129848	7.37231	-2.79821	0.00551841	0.047144	-2.53179	HLA-DMA	protein_coding	down
ENSG00000118873.16	-0.0538855	5.75571	-2.79759	0.0055287	0.0471846	-2.5199	RAB3GAP2	protein_coding	down
ENSG00000010671.15	-0.101241	6.73069	-2.79749	0.00553031	0.0471846	-2.5289	BTK	protein_coding	down
ENSG00000133789.15	-0.125033	5.15105	-2.79698	0.00553882	0.0471917	-2.47681	SWAP70	protein_coding	down
ENSG00000139505.11	-0.0800914	6.3403	-2.79689	0.00554032	0.0471917	-2.53544	MTMR6	protein_coding	down
ENSG00000213585.11	-0.0836285	5.90855	-2.79658	0.00554544	0.0471917	-2.50975	VDAC1	protein_coding	down
ENSG00000155085.15	0.143821	2.19483	2.79658	0.00554544	0.0471917	-2.27133	AK9	protein_coding	up
ENSG00000167969.13	-0.0972009	3.64878	-2.79566	0.00556075	0.0472915	-2.37294	ECI1	protein_coding	down
ENSG00000182566.13	-0.367391	0.957901	-2.79514	0.00556958	0.0473361	-2.29503	CLEC4G	protein_coding	down
ENSG00000122729.19	0.123639	4.16361	2.79304	0.0056047	0.0476038	-2.44543	ACO1	protein_coding	up
ENSG00000114520.11	-0.0899165	4.23219	-2.79193	0.00562343	0.0477211	-2.41644	SNX4	protein_coding	down
ENSG00000020426.11	0.152588	1.01385	2.79162	0.00562863	0.0477211	-2.27583	MNAT1	protein_coding	up
ENSG00000133704.10	-0.08206	6.01344	-2.79158	0.00562935	0.0477211	-2.53818	IPO8	protein_coding	down
ENSG00000216895.9	0.15454	0.908279	2.7891	0.00567133	0.0480418	-2.30056	AC009403.1	antisense	up
ENSG00000183401.12	-0.111933	4.50311	-2.78881	0.00567623	0.0480418	-2.4633	CCDC159	protein_coding	down
ENSG00000248905.8	-0.292212	4.50431	-2.7887	0.0056781	0.0480418	-2.46105	FMN1	protein_coding	down
ENSG00000180096.12	0.313221	1.72913	2.78843	0.00568277	0.0480505	-2.2764	2025-09-01	protein_coding	up
ENSG00000196531.10	-0.0662867	8.56725	-2.78791	0.00569162	0.0480946	-2.54131	NACA	protein_coding	down
ENSG00000101773.19	-0.153873	4.12138	-2.78718	0.00570401	0.0481684	-2.41965	RBBP8	protein_coding	down
ENSG00000169814.13	0.0896767	3.51784	2.78675	0.00571139	0.0481999	-2.39708	BTD	protein_coding	up
ENSG00000142039.4	0.0937304	5.07568	2.7865	0.00571564	0.0482049	-2.51833	CCDC97	protein_coding	up
ENSG00000125971.16	0.0862698	4.91927	2.78539	0.00573477	0.0483277	-2.49792	DYNLRB1	protein_coding	up
ENSG00000224470.8	-0.0710662	6.42252	-2.78523	0.00573751	0.0483277	-2.57446	ATXN1L	protein_coding	down
ENSG00000159423.17	-0.157753	2.4096	-2.78382	0.00576171	0.0485005	-2.30382	ALDH4A1	protein_coding	down
ENSG00000158373.8	0.157816	4.72046	2.7818	0.00579672	0.0487641	-2.50182	HIST1H2BD	protein_coding	up
ENSG00000275023.4	0.10063	6.46677	2.78121	0.00580687	0.0488173	-2.58652	MLLT6	protein_coding	up
ENSG00000203880.12	0.0814989	5.87751	2.7808	0.00581403	0.0488173	-2.57292	PCMTD2	protein_coding	up
ENSG00000073792.15	0.180772	4.15835	2.7808	0.00581413	0.0488173	-2.47174	IGF2BP2	protein_coding	up
ENSG00000084092.7	-0.0777785	5.10734	-2.78048	0.0058196	0.0488268	-2.52984	NOA1	protein_coding	down
ENSG00000127084.19	0.0933835	7.2518	2.78031	0.00582266	0.0488268	-2.59129	FGD3	protein_coding	up
ENSG00000171840.11	0.178707	3.22076	2.77966	0.00583399	0.0488907	-2.38499	NINJ2	protein_coding	up
ENSG00000101290.14	0.088337	6.64769	2.7785	0.00585414	0.0490025	-2.59929	CDS2	protein_coding	up
ENSG00000105618.14	-0.0725915	4.14397	-2.77847	0.00585476	0.0490025	-2.44521	PRPF31	protein_coding	down
ENSG00000198561.13	-0.132303	6.3121	-2.77757	0.00587043	0.0490841	-2.56974	CTNND1	protein_coding	down
ENSG00000116990.11	-0.115715	6.06989	-2.77749	0.00587195	0.0490841	-2.563	MYCL	protein_coding	down
ENSG00000162511.8	-0.101986	10.6731	-2.77657	0.00588805	0.0491876	-2.52532	LAPTM5	protein_coding	down
ENSG00000182512.5	0.178864	4.52885	2.7759	0.00589984	0.0492246	-2.5202	GLRX5	protein_coding	up
ENSG00000120685.20	-0.0985761	5.73053	-2.77589	0.00589994	0.0492246	-2.57732	PROSER1	protein_coding	down
ENSG00000144597.14	-0.0940367	5.7829	-2.77568	0.00590374	0.0492251	-2.57092	EAF1	protein_coding	down
ENSG00000111875.8	0.097143	3.6899	2.77463	0.00592221	0.049348	-2.44658	ASF1A	protein_coding	up
ENSG00000175294.5	-0.136367	2.81834	-2.77406	0.00593237	0.049359	-2.35454	CATSPER1	protein_coding	down
ENSG00000120158.12	0.183114	1.44999	2.77401	0.00593321	0.049359	-2.31252	RCL1	protein_coding	up
ENSG00000164944.12	-0.0823646	6.04351	-2.77392	0.00593475	0.049359	-2.59277	VIRMA	protein_coding	down
ENSG00000010327.10	-0.202523	8.27162	-2.77355	0.00594137	0.0493811	-2.58168	STAB1	protein_coding	down
ENSG00000153234.14	-0.220188	5.20966	-2.77335	0.0059449	0.0493811	-2.50242	NR4A2	protein_coding	down
ENSG00000130717.13	-0.0880057	3.68154	-2.77314	0.00594863	0.0493811	-2.43376	UCK1	protein_coding	down
ENSG00000168461.13	-0.0883915	8.0748	-2.77277	0.00595525	0.049405	-2.59307	RAB31	protein_coding	down
ENSG00000129351.17	-0.0736487	7.31818	-2.77147	0.00597842	0.049566	-2.61025	ILF3	protein_coding	down
ENSG00000110321.17	-0.0655443	9.34974	-2.77109	0.00598523	0.0495914	-2.57331	EIF4G2	protein_coding	down
ENSG00000139180.11	0.0795263	4.69639	2.7707	0.00599217	0.0496177	-2.53166	NDUFA9	protein_coding	up
ENSG00000021762.20	0.114513	4.87054	2.77033	0.00599871	0.0496407	-2.55025	OSBPL5	protein_coding	up
ENSG00000131446.16	-0.0922833	8.48433	-2.76977	0.00600879	0.049693	-2.59733	MGAT1	protein_coding	down
ENSG00000167536.14	0.210909	1.84844	2.76931	0.00601693	0.0497292	-2.32279	DHRS13	protein_coding	up
ENSG00000169826.8	-0.0934299	7.01172	-2.76728	0.00605352	0.0500003	-2.61794	CSGALNACT2	protein_coding	ns
ENSG00000164292.13	0.182551	2.31982	2.76697	0.00605919	0.0500158	-2.3467	RHOBTB3	protein_coding	ns
ENSG00000271204.1	0.187986	2.44379	2.76637	0.0060699	0.0500729	-2.3565	AC016831.5	lincRNA	ns
ENSG00000166797.11	-0.108468	5.2532	-2.76552	0.00608537	0.0501568	-2.55659	CIAO2A	protein_coding	ns
ENSG00000164463.12	0.0922123	6.55261	2.76521	0.0060909	0.0501568	-2.63201	CREBRF	protein_coding	ns
ENSG00000076067.13	-0.176499	5.30692	-2.76498	0.00609507	0.0501568	-2.56888	RBMS2	protein_coding	ns
ENSG00000139190.16	0.151493	4.27782	2.76468	0.00610054	0.0501568	-2.52339	VAMP1	protein_coding	ns
ENSG00000166352.16	-0.164753	1.08436	-2.76465	0.00610108	0.0501568	-2.34225	C11orf74	protein_coding	ns
ENSG00000225697.13	-0.123157	4.62047	-2.76455	0.00610288	0.0501568	-2.53362	SLC26A6	protein_coding	ns
ENSG00000189403.15	-0.105169	7.75508	-2.76422	0.00610892	0.0501668	-2.61454	HMGB1	protein_coding	ns
ENSG00000092847.12	-0.110427	7.22381	-2.76407	0.00611169	0.0501668	-2.63098	AGO1	protein_coding	ns
ENSG00000127870.17	-0.0834196	5.53564	-2.7637	0.00611835	0.0501902	-2.59588	RNF6	protein_coding	ns
ENSG00000090554.13	0.185407	2.53783	2.76323	0.00612698	0.0502108	-2.36701	FLT3LG	protein_coding	ns
ENSG00000251022.6	-0.0984458	4.8868	-2.76315	0.00612846	0.0502108	-2.54935	THAP9-AS1	antisense	ns
ENSG00000172331.12	0.215975	3.17128	2.76276	0.00613557	0.0502378	-2.42963	BPGM	protein_coding	ns
ENSG00000143919.15	0.135825	1.54574	2.76254	0.0061396	0.0502397	-2.33643	CAMKMT	protein_coding	ns
ENSG00000080371.6	-0.0577115	6.62599	-2.76203	0.00614881	0.0502436	-2.6357	RAB21	protein_coding	ns
ENSG00000110876.9	0.146085	7.65295	2.76203	0.00614894	0.0502436	-2.63126	SELPLG	protein_coding	ns
ENSG00000160294.11	-0.0579846	6.40753	-2.76189	0.00615151	0.0502436	-2.63251	MCM3AP	protein_coding	ns
ENSG00000174943.11	0.0998904	3.69829	2.76109	0.00616601	0.0503309	-2.47748	KCTD13	protein_coding	ns
ENSG00000109814.12	-0.113362	3.44998	-2.7608	0.00617142	0.050344	-2.44378	UGDH	protein_coding	ns
ENSG00000212907.2	-0.178762	7.56805	-2.76042	0.00617831	0.0503691	-2.56861	MT-ND4L	protein_coding	ns
ENSG00000134291.12	0.152478	1.77037	2.75956	0.00619421	0.0504675	-2.3448	TMEM106C	protein_coding	ns
ENSG00000128789.21	-0.0853295	5.55726	-2.7592	0.00620083	0.0504903	-2.61035	PSMG2	protein_coding	ns
ENSG00000014914.21	-0.151993	5.60016	-2.75882	0.0062079	0.0505167	-2.59826	MTMR11	protein_coding	ns
ENSG00000113013.14	-0.0613907	6.66254	-2.75839	0.00621585	0.0505502	-2.63136	HSPA9	protein_coding	ns
ENSG00000165527.7	-0.095353	7.92341	-2.75715	0.00623873	0.0506982	-2.63982	ARF6	protein_coding	ns
ENSG00000008130.15	0.0920659	7.97785	2.75699	0.00624172	0.0506982	-2.64078	NADK	protein_coding	ns
ENSG00000271383.7	-0.137201	6.57853	-2.75636	0.00625339	0.0507617	-2.64347	NBPF19	protein_coding	ns
ENSG00000169018.6	-0.0609802	6.6763	-2.75605	0.00625907	0.0507733	-2.63955	FEM1B	protein_coding	ns
ENSG00000124942.14	-0.135095	12.2992	-2.75587	0.00626252	0.0507733	-2.52907	AHNAK	protein_coding	ns
ENSG00000105755.8	-0.124084	3.73151	-2.75451	0.00628775	0.0509466	-2.47832	ETHE1	protein_coding	ns
ENSG00000178573.7	0.27892	3.46983	2.75344	0.00630794	0.0510788	-2.48459	MAF	protein_coding	ns
ENSG00000176700.20	0.0843477	4.34619	2.75211	0.00633276	0.0512484	-2.56512	SCAND2P	transcribed_unprocessed_pseudogene	ns
ENSG00000233476.3	-0.154249	3.06681	-2.75111	0.00635169	0.0513418	-2.41296	EEF1A1P6	processed_pseudogene	ns
ENSG00000102900.13	-0.0653308	5.27257	-2.75084	0.00635675	0.0513418	-2.61087	NUP93	protein_coding	ns
ENSG00000158406.4	0.142934	4.25544	2.75082	0.00635704	0.0513418	-2.53695	HIST1H4H	protein_coding	ns
ENSG00000170043.11	0.0956108	5.04723	2.75056	0.00636196	0.0513418	-2.58605	TRAPPC1	protein_coding	ns
ENSG00000014257.16	-0.134533	5.77236	-2.75047	0.00636376	0.0513418	-2.64472	ACPP	protein_coding	ns
ENSG00000140471.17	0.0978584	4.23343	2.74934	0.00638504	0.0514808	-2.56734	LINS1	protein_coding	ns
ENSG00000143379.12	-0.0630325	5.90561	-2.74913	0.00638902	0.0514808	-2.65527	SETDB1	protein_coding	ns
ENSG00000142453.11	0.136825	4.75258	2.74887	0.00639387	0.0514808	-2.5914	CARM1	protein_coding	ns
ENSG00000180694.14	0.132835	3.03869	2.74873	0.00639658	0.0514808	-2.44864	TMEM64	protein_coding	ns
ENSG00000146192.15	-0.113092	7.51047	-2.74751	0.00641978	0.051636	-2.66375	FGD2	protein_coding	ns
ENSG00000173548.8	-0.0945058	3.8868	-2.74713	0.00642696	0.0516623	-2.51404	SNX33	protein_coding	ns
ENSG00000188878.19	0.164785	1.54809	2.74623	0.00644418	0.0517691	-2.3743	FBF1	protein_coding	ns
ENSG00000268218.1	0.139341	2.49559	2.74535	0.00646092	0.0518615	-2.40657	AC137932.3	antisense	ns
ENSG00000267769.1	-0.288457	-0.787197	-2.74522	0.00646354	0.0518615	-2.65824	AC011498.6	antisense	ns
ENSG00000159761.15	-0.137613	1.61189	-2.74427	0.0064817	0.0519428	-2.37887	C16orf86	protein_coding	ns
ENSG00000140391.14	-0.17304	5.97828	-2.74421	0.00648288	0.0519428	-2.66865	TSPAN3	protein_coding	ns
ENSG00000144959.10	-0.170868	4.75069	-2.74407	0.00648547	0.0519428	-2.58587	NCEH1	protein_coding	ns
ENSG00000205763.13	-0.188699	0.565321	-2.74316	0.00650306	0.0520521	-2.4379	RP9P	transcribed_unprocessed_pseudogene	ns
ENSG00000235863.3	0.0989109	3.28131	2.74222	0.0065211	0.0521386	-2.48276	B3GALT4	protein_coding	ns
ENSG00000065243.20	0.0932764	6.16241	2.74219	0.00652176	0.0521386	-2.68875	PKN2	protein_coding	ns
ENSG00000280734.2	0.162154	2.31405	2.74169	0.00653139	0.0521618	-2.40927	LINC01232	processed_transcript	ns
ENSG00000153975.10	-0.105287	2.78488	-2.74163	0.00653257	0.0521618	-2.43732	ZUP1	protein_coding	ns
ENSG00000167377.18	0.148601	1.90142	2.74133	0.0065383	0.0521759	-2.3933	ZNF23	protein_coding	ns
ENSG00000213366.13	0.252617	1.9386	2.74067	0.0065511	0.0522465	-2.39413	GSTM2	protein_coding	ns
ENSG00000266714.9	-0.138299	7.14566	-2.739	0.00658344	0.0524728	-2.69065	MYO15B	protein_coding	ns
ENSG00000103365.15	-0.100383	6.37423	-2.73859	0.00659138	0.0525043	-2.69142	GGA2	protein_coding	ns
ENSG00000136205.17	-0.112886	6.64077	-2.73796	0.00660383	0.0525718	-2.68011	TNS3	protein_coding	ns
ENSG00000131378.14	0.0977507	5.36093	2.73669	0.00662862	0.0527373	-2.67114	RFTN1	protein_coding	ns
ENSG00000106258.15	0.139051	1.92909	2.73588	0.00664444	0.0528313	-2.40638	CYP3A5	protein_coding	ns
ENSG00000138380.18	0.0895739	3.3492	2.73566	0.00664868	0.0528332	-2.51396	CARF	protein_coding	ns
ENSG00000147459.18	0.0802881	7.86325	2.73489	0.00666392	0.0529224	-2.7018	DOCK5	protein_coding	ns
ENSG00000104964.14	0.0874258	7.24121	2.7331	0.00669926	0.0531462	-2.71498	AES	protein_coding	ns
ENSG00000243650.3	0.254401	-0.392708	2.73279	0.00670538	0.0531462	-2.57146	RN7SL834P	misc_RNA	ns
ENSG00000139921.13	-0.0807251	6.03687	-2.73254	0.00671029	0.0531462	-2.67034	TMX1	protein_coding	ns
ENSG00000277734.8	0.646428	0.388935	2.73247	0.00671163	0.0531462	-2.44305	TRAC	TR_C_gene	ns
ENSG00000186687.16	0.111071	3.58999	2.73241	0.00671296	0.0531462	-2.54225	LYRM7	protein_coding	ns
ENSG00000005961.18	0.642385	2.24339	2.73224	0.00671626	0.0531462	-2.42984	ITGA2B	protein_coding	ns
ENSG00000258539.1	0.193336	1.99314	2.73173	0.00672628	0.053176	-2.41475	AC068896.1	protein_coding	ns
ENSG00000156273.16	-0.0893452	8.9756	-2.73164	0.00672808	0.053176	-2.68301	BACH1	protein_coding	ns
ENSG00000134324.11	0.108703	4.50211	2.7313	0.00673481	0.0531795	-2.63662	LPIN1	protein_coding	ns
ENSG00000185482.8	-0.137978	4.01041	-2.73121	0.00673658	0.0531795	-2.5615	STAC3	protein_coding	ns
ENSG00000111843.14	-0.118367	4.3349	-2.72995	0.00676174	0.0533462	-2.59173	TMEM14C	protein_coding	ns
ENSG00000175110.11	-0.066956	4.09773	-2.7291	0.00677871	0.0534258	-2.58406	MRPS22	protein_coding	ns
ENSG00000238227.8	0.0989759	4.97043	2.72895	0.00678169	0.0534258	-2.65457	TMEM250	protein_coding	ns
ENSG00000119509.13	0.0957732	3.75409	2.72876	0.00678552	0.0534258	-2.57101	INVS	protein_coding	ns
ENSG00000100345.21	-0.0911224	10.084	-2.72863	0.00678802	0.0534258	-2.66408	MYH9	protein_coding	ns
ENSG00000223547.10	0.17076	3.41376	2.72826	0.00679541	0.0534521	-2.53718	ZNF844	protein_coding	ns
ENSG00000064961.19	-0.0809902	5.25652	-2.72798	0.00680113	0.0534652	-2.66468	HMG20B	protein_coding	ns
ENSG00000133773.12	-0.0845117	4.57231	-2.72667	0.00682738	0.0536397	-2.61085	CCDC59	protein_coding	ns
ENSG00000114745.13	-0.0793356	5.61862	-2.72623	0.0068362	0.05365	-2.70166	GORASP1	protein_coding	ns
ENSG00000117335.19	0.0796481	7.94667	2.7261	0.00683881	0.05365	-2.72041	CD46	protein_coding	ns
ENSG00000141380.14	-0.0684017	5.91779	-2.726	0.0068409	0.05365	-2.70867	SS18	protein_coding	ns
ENSG00000183431.12	-0.101795	5.61997	-2.72453	0.00687065	0.0538514	-2.70044	SF3A3	protein_coding	ns
ENSG00000120889.13	-0.088464	6.83072	-2.72426	0.006876	0.0538613	-2.72982	TNFRSF10B	protein_coding	ns
ENSG00000126005.17	0.0801877	5.07567	2.72392	0.00688285	0.053883	-2.67377	MMP24OS	protein_coding	ns
ENSG00000233024.7	0.229252	3.58213	2.72351	0.00689126	0.0539169	-2.56057	NPIPA9	protein_coding	ns
ENSG00000163754.17	-0.0957463	5.54132	-2.7226	0.00690965	0.0540287	-2.69635	GYG1	protein_coding	ns
ENSG00000243335.9	0.149266	3.88027	2.72161	0.00692977	0.0541539	-2.60297	KCTD7	protein_coding	ns
ENSG00000109911.19	0.096491	4.40907	2.72123	0.00693763	0.0541833	-2.64464	ELP4	protein_coding	ns
ENSG00000136819.15	0.121056	5.22384	2.72038	0.0069549	0.0542508	-2.69819	C9orf78	protein_coding	ns
ENSG00000177885.15	-0.0707778	8.42701	-2.72013	0.00696	0.0542508	-2.72768	GRB2	protein_coding	ns
ENSG00000010626.15	-0.177058	0.901704	-2.71996	0.00696364	0.0542508	-2.45818	LRRC23	protein_coding	ns
ENSG00000177879.16	-0.0924702	5.14097	-2.71992	0.00696443	0.0542508	-2.67882	AP3S1	protein_coding	ns
ENSG00000224531.6	-0.0978017	3.34124	-2.7198	0.00696683	0.0542508	-2.53854	SMIM13	protein_coding	ns
ENSG00000135924.15	0.135344	4.5734	2.71872	0.00698894	0.0543909	-2.67036	DNAJB2	protein_coding	ns
ENSG00000177485.7	-0.108749	5.93401	-2.71768	0.00701042	0.0544956	-2.72407	ZBTB33	protein_coding	ns
ENSG00000133056.13	0.215874	1.84064	2.71767	0.00701065	0.0544956	-2.44407	PIK3C2B	protein_coding	ns
ENSG00000234127.9	-0.0787273	5.55372	-2.7173	0.00701815	0.0545218	-2.72192	TRIM26	protein_coding	ns
ENSG00000283839.1	-0.135279	4.42465	-2.7163	0.00703892	0.054651	-2.64216	AC096667.1	antisense	ns
ENSG00000111203.13	0.0797121	4.44894	2.71574	0.00705053	0.0546784	-2.66418	ITFG2	protein_coding	ns
ENSG00000153914.16	-0.0735169	6.45982	-2.71573	0.00705073	0.0546784	-2.75116	SREK1	protein_coding	ns
ENSG00000175376.9	-0.0817814	4.53612	-2.71537	0.00705802	0.0547027	-2.66395	EIF1AD	protein_coding	ns
ENSG00000224078.14	0.189106	4.00904	2.7147	0.00707193	0.0547784	-2.63194	SNHG14	processed_transcript	ns
ENSG00000060558.3	-0.125606	5.12748	-2.71347	0.00709753	0.0549445	-2.67524	GNA15	protein_coding	ns
ENSG00000108622.11	0.119762	4.45311	2.71279	0.00711176	0.0550224	-2.65339	ICAM2	protein_coding	ns
ENSG00000159086.15	-0.0794669	5.57415	-2.71201	0.00712799	0.0551156	-2.73412	PAXBP1	protein_coding	ns
ENSG00000183598.3	0.22397	1.50999	2.71156	0.00713743	0.0551526	-2.45634	HIST2H3D	protein_coding	ns
ENSG00000197815.4	0.209552	0.660252	2.71132	0.00714258	0.0551526	-2.48591	AC122129.1	antisense	ns
ENSG00000156958.15	0.0823118	3.63927	2.71119	0.00714531	0.0551526	-2.59716	GALK2	protein_coding	ns
ENSG00000127528.5	0.177346	8.06279	2.71069	0.00715571	0.0552006	-2.75551	KLF2	protein_coding	ns
ENSG00000257433.5	0.214832	0.648848	2.70938	0.00718316	0.0553596	-2.49528	AC004241.1	antisense	ns
ENSG00000100300.18	-0.101066	7.45449	-2.70906	0.00718987	0.0553596	-2.75852	TSPO	protein_coding	ns
ENSG00000272106.1	-0.11338	2.75612	-2.70889	0.00719365	0.0553596	-2.50865	AL691432.2	antisense	ns
ENSG00000143119.14	0.097642	8.2451	2.70888	0.00719386	0.0553596	-2.75873	CD53	protein_coding	ns
ENSG00000166747.12	-0.0803055	6.88205	-2.70869	0.00719772	0.0553596	-2.77883	AP1G1	protein_coding	ns
ENSG00000156515.23	-0.0763673	7.24838	-2.70833	0.00720546	0.0553596	-2.77095	HK1	protein_coding	ns
ENSG00000072071.16	0.119768	2.90234	2.70832	0.00720569	0.0553596	-2.53004	ADGRL1	protein_coding	ns
ENSG00000047346.12	0.0900446	4.99758	2.70805	0.00721129	0.0553704	-2.7313	FAM214A	protein_coding	ns
ENSG00000198492.16	-0.0772328	6.22806	-2.70712	0.00723094	0.0554535	-2.7706	YTHDF2	protein_coding	ns
ENSG00000004142.12	-0.0587076	5.38693	-2.70711	0.00723112	0.0554535	-2.73909	POLDIP2	protein_coding	ns
ENSG00000132773.12	-0.0869026	3.01114	-2.70694	0.00723471	0.0554535	-2.53892	TOE1	protein_coding	ns
ENSG00000168685.15	0.613321	2.67619	2.70645	0.00724525	0.0555021	-2.50972	IL7R	protein_coding	ns
ENSG00000164818.16	0.0872866	3.37495	2.70609	0.00725282	0.0555279	-2.57919	DNAAF5	protein_coding	ns
ENSG00000196810.4	0.137085	2.93179	2.70554	0.00726441	0.0555841	-2.54023	CTBP1-DT	antisense	ns
ENSG00000065457.10	0.0875366	4.14083	2.70535	0.00726859	0.0555841	-2.66517	ADAT1	protein_coding	ns
ENSG00000111252.10	-0.0811173	8.41655	-2.70489	0.00727831	0.0556262	-2.76767	SH2B3	protein_coding	ns
ENSG00000144445.17	0.06942	4.80722	2.70369	0.00730404	0.0557905	-2.72652	KANSL1L	protein_coding	ns
ENSG00000238005.3	0.275366	-0.202824	2.70313	0.00731602	0.0558426	-2.60819	AL391832.2	lincRNA	ns
ENSG00000138029.14	-0.0799239	6.66428	-2.70292	0.00732032	0.0558426	-2.78056	HADHB	protein_coding	ns
ENSG00000087589.16	0.259326	3.6136	2.70277	0.00732355	0.0558426	-2.6159	CASS4	protein_coding	ns
ENSG00000105202.9	-0.125631	5.38508	-2.70225	0.00733476	0.0558667	-2.73699	FBL	protein_coding	ns
ENSG00000227077.3	0.450633	-3.3642	2.70223	0.00733518	0.0558667	-3.25701	AC107983.1	processed_pseudogene	ns
ENSG00000119048.7	0.0997975	5.57379	2.70193	0.00734155	0.055883	-2.77604	UBE2B	protein_coding	ns
ENSG00000100836.10	-0.0930347	5.76849	-2.70164	0.00734784	0.0558986	-2.75345	PABPN1	protein_coding	ns
ENSG00000161980.5	0.158066	2.13705	2.70049	0.0073727	0.0560555	-2.49431	POLR3K	protein_coding	ns
ENSG00000137038.8	0.116534	2.90975	2.70017	0.00737943	0.0560743	-2.55734	DMAC1	protein_coding	ns
ENSG00000145545.12	-0.101996	4.70386	-2.6996	0.00739175	0.0561258	-2.71554	SRD5A1	protein_coding	ns
ENSG00000161202.19	-0.0770369	5.87894	-2.69947	0.00739471	0.0561258	-2.76986	DVL3	protein_coding	ns
ENSG00000159842.15	-0.0700481	7.49468	-2.69897	0.00740542	0.0561748	-2.79774	ABR	protein_coding	ns
ENSG00000113732.9	0.0913055	6.66519	2.69838	0.00741821	0.0562395	-2.79789	ATP6V0E1	protein_coding	ns
ENSG00000102103.16	-0.104307	3.93011	-2.69778	0.00743133	0.0563066	-2.63628	PQBP1	protein_coding	ns
ENSG00000008086.11	0.114152	4.18066	2.69674	0.00745387	0.056445	-2.68906	CDKL5	protein_coding	ns
ENSG00000168067.12	0.0862761	4.92824	2.69591	0.00747194	0.0565491	-2.74854	MAP4K2	protein_coding	ns
ENSG00000161791.14	0.157803	4.91053	2.69572	0.00747619	0.0565491	-2.75203	FMNL3	protein_coding	ns
ENSG00000122678.17	0.0857942	4.3917	2.69515	0.00748855	0.0566102	-2.70369	POLM	protein_coding	ns
ENSG00000109133.13	-0.0712993	7.35451	-2.69493	0.0074933	0.0566136	-2.80586	TMEM33	protein_coding	ns
ENSG00000124151.19	-0.0820572	7.65141	-2.69431	0.00750691	0.056684	-2.807	NCOA3	protein_coding	ns
ENSG00000281005.1	0.165443	3.74124	2.69406	0.00751239	0.056693	-2.65899	LINC00921	lincRNA	ns
ENSG00000156256.15	-0.0695459	5.2968	-2.69351	0.00752439	0.0567511	-2.7605	USP16	protein_coding	ns
ENSG00000266998.1	0.192865	2.00481	2.69317	0.00753189	0.0567608	-2.50668	AC111182.1	antisense	ns
ENSG00000205531.13	0.0660091	5.22517	2.69306	0.00753428	0.0567608	-2.76931	NAP1L4	protein_coding	ns
ENSG00000154889.16	0.0978874	5.33688	2.69276	0.00754099	0.0567709	-2.7832	MPPE1	protein_coding	ns
ENSG00000183486.13	0.156855	7.30483	2.69258	0.00754493	0.0567709	-2.81627	MX2	protein_coding	ns
ENSG00000089289.16	-0.0973426	6.08897	-2.69236	0.00754986	0.0567709	-2.78846	IGBP1	protein_coding	ns
ENSG00000152700.14	-0.0750774	6.01502	-2.69222	0.00755283	0.0567709	-2.80216	SAR1B	protein_coding	ns
ENSG00000260682.3	0.488609	-1.44329	2.69146	0.0075695	0.0568639	-2.79846	RN7SKP176	misc_RNA	ns
ENSG00000198736.11	0.108252	6.46845	2.69121	0.00757507	0.0568734	-2.81693	MSRB1	protein_coding	ns
ENSG00000101407.13	0.0669727	4.41548	2.6907	0.00758641	0.0569261	-2.72635	TTI1	protein_coding	ns
ENSG00000138617.15	0.158694	2.85803	2.69039	0.00759324	0.056945	-2.57004	PARP16	protein_coding	ns
ENSG00000281103.1	0.350705	2.72584	2.68897	0.00762472	0.0571402	-2.5688	TRG-AS1	antisense	ns
ENSG00000177409.12	0.190556	6.77296	2.68883	0.00762793	0.0571402	-2.81359	SAMD9L	protein_coding	ns
ENSG00000107874.11	-0.0719146	3.69794	-2.6885	0.00763528	0.0571628	-2.64767	CUEDC2	protein_coding	ns
ENSG00000132965.9	0.246831	5.02792	2.68728	0.00766249	0.057334	-2.78104	ALOX5AP	protein_coding	ns
ENSG00000149289.11	-0.169951	3.3047	-2.68638	0.00768254	0.0574003	-2.61451	ZC3H12C	protein_coding	ns
ENSG00000186001.13	0.0694651	5.2827	2.68632	0.00768393	0.0574003	-2.79752	LRCH3	protein_coding	ns
ENSG00000155008.14	-0.100789	4.39808	-2.6863	0.00768439	0.0574003	-2.7185	APOOL	protein_coding	ns
ENSG00000131269.17	-0.0687359	4.65463	-2.68541	0.00770419	0.0575156	-2.73638	ABCB7	protein_coding	ns
ENSG00000092871.16	0.0745442	6.16056	2.68515	0.00770998	0.0575263	-2.83093	RFFL	protein_coding	ns
ENSG00000212195.2	-0.464952	0.798323	-2.68481	0.00771763	0.0575509	-2.52489	RF00012	snoRNA	ns
ENSG00000138760.10	-0.0784306	6.84107	-2.6845	0.0077246	0.0575703	-2.82044	SCARB2	protein_coding	ns
ENSG00000092978.11	-0.0872832	3.60149	-2.68369	0.0077429	0.0576741	-2.65737	GPATCH2	protein_coding	ns
ENSG00000175106.16	0.154573	2.0172	2.68236	0.00777291	0.057865	-2.53478	TVP23C	protein_coding	ns
ENSG00000265666.1	0.120167	3.97256	2.68169	0.00778813	0.0579456	-2.69969	RARA-AS1	antisense	ns
ENSG00000007392.16	-0.0857054	5.46669	-2.68136	0.00779557	0.0579683	-2.81568	LUC7L	protein_coding	ns
ENSG00000110042.8	-0.1731	5.46121	-2.68015	0.00782309	0.0581402	-2.81037	DTX4	protein_coding	ns
ENSG00000169499.15	-0.0627939	7.03271	-2.67938	0.0078405	0.0582368	-2.85041	PLEKHA2	protein_coding	ns
ENSG00000101421.4	-0.104217	6.59833	-2.67873	0.00785539	0.0583145	-2.8466	CHMP4B	protein_coding	ns
ENSG00000136875.12	-0.0821397	4.39297	-2.67748	0.00788396	0.0584816	-2.7346	PRPF4	protein_coding	ns
ENSG00000167930.16	-0.0864091	4.51876	-2.67736	0.00788676	0.0584816	-2.74494	FAM234A	protein_coding	ns
ENSG00000169203.16	0.231845	3.89848	2.67687	0.00789799	0.0585321	-2.69085	NPIPB12	protein_coding	ns
ENSG00000100604.13	0.260584	0.10084	2.67659	0.00790436	0.0585464	-2.61805	CHGA	protein_coding	ns
ENSG00000188026.13	0.162788	2.02212	2.67623	0.0079126	0.0585745	-2.54506	RILPL1	protein_coding	ns
ENSG00000180263.14	-0.155595	5.47281	-2.6753	0.0079339	0.0586993	-2.81036	FGD6	protein_coding	ns
ENSG00000260630.6	0.169829	2.03002	2.67446	0.00795333	0.0588101	-2.55362	SNAI3-AS1	antisense	ns
ENSG00000183684.7	-0.0845581	3.85106	-2.67378	0.00796906	0.0588679	-2.66923	ALYREF	protein_coding	ns
ENSG00000111850.11	0.137427	2.11915	2.67374	0.00797007	0.0588679	-2.56335	SMIM8	protein_coding	ns
ENSG00000041357.16	-0.114792	6.42017	-2.67334	0.00797919	0.0589023	-2.84114	PSMA4	protein_coding	ns
ENSG00000165140.10	-0.144957	5.21264	-2.67304	0.00798627	0.0589216	-2.79012	FBP1	protein_coding	ns
ENSG00000144535.19	0.0707754	4.4469	2.67274	0.00799305	0.0589387	-2.77376	DIS3L2	protein_coding	ns
ENSG00000150457.9	-0.0894523	5.73113	-2.67201	0.00801002	0.0590308	-2.83929	LATS2	protein_coding	ns
ENSG00000064393.16	-0.136681	7.22585	-2.66968	0.00806442	0.0593845	-2.8712	HIPK2	protein_coding	ns
ENSG00000124172.10	0.139864	6.89626	2.66957	0.00806701	0.0593845	-2.8621	ATP5F1E	protein_coding	ns
ENSG00000147905.17	0.0669986	4.35723	2.66933	0.00807265	0.0593857	-2.76776	ZCCHC7	protein_coding	ns
ENSG00000118690.13	0.149715	1.96295	2.66918	0.00807616	0.0593857	-2.55853	ARMC2	protein_coding	ns
ENSG00000162804.14	0.178887	3.68282	2.66887	0.00808329	0.059405	-2.70834	SNED1	protein_coding	ns
ENSG00000147140.16	-0.0667735	7.81273	-2.66747	0.00811613	0.0596132	-2.87045	NONO	protein_coding	ns
ENSG00000145901.15	0.092772	6.69147	2.66643	0.00814072	0.0597273	-2.88572	TNIP1	protein_coding	ns
ENSG00000101166.16	-0.0706219	5.1621	-2.66622	0.00814552	0.0597273	-2.81718	PRELID3B	protein_coding	ns
ENSG00000112282.18	-0.0732312	5.72096	-2.66589	0.00815342	0.0597273	-2.86765	MED23	protein_coding	ns
ENSG00000183718.5	0.0825875	4.71605	2.66583	0.00815485	0.0597273	-2.81877	TRIM52	protein_coding	ns
ENSG00000106477.19	0.119573	2.10553	2.6658	0.00815555	0.0597273	-2.57523	CEP41	protein_coding	ns
ENSG00000138448.12	-0.0955405	5.01953	-2.66566	0.00815883	0.0597273	-2.80573	ITGAV	protein_coding	ns
ENSG00000131089.15	0.103781	3.28402	2.66518	0.00817005	0.0597763	-2.67618	ARHGEF9	protein_coding	ns
ENSG00000258365.1	0.222809	0.371168	2.66369	0.00820554	0.0600028	-2.60499	AC073655.2	antisense	ns
ENSG00000161956.13	-0.076257	4.83208	-2.66301	0.00822151	0.0600862	-2.81021	SENP3	protein_coding	ns
ENSG00000158517.13	0.174689	7.94946	2.66278	0.00822704	0.0600934	-2.88219	NCF1	protein_coding	ns
ENSG00000244625.6	0.149	1.7171	2.66223	0.00824012	0.0601556	-2.56934	MIATNB	lincRNA	ns
ENSG00000139531.13	-0.100841	3.52624	-2.66203	0.00824483	0.0601567	-2.69148	SUOX	protein_coding	ns
ENSG00000179335.18	0.0726661	6.5881	2.66131	0.00826206	0.0602492	-2.89905	CLK3	protein_coding	ns
ENSG00000107164.16	-0.069527	4.52885	-2.66098	0.00827002	0.0602739	-2.79511	FUBP3	protein_coding	ns
ENSG00000089041.17	-0.129477	6.11232	-2.65971	0.00830035	0.0604456	-2.87524	P2RX7	protein_coding	ns
ENSG00000197971.15	0.0991417	7.44443	2.65961	0.00830275	0.0604456	-2.89805	MBP	protein_coding	ns
ENSG00000272182.1	-0.161432	1.09279	-2.6584	0.00833196	0.0606249	-2.58513	AC135507.1	antisense	ns
ENSG00000204713.11	0.0817576	6.21867	2.65817	0.0083375	0.0606318	-2.90008	TRIM27	protein_coding	ns
ENSG00000125812.16	-0.0985358	5.45226	-2.65758	0.00835169	0.0607015	-2.84079	GZF1	protein_coding	ns
ENSG00000115687.13	0.169676	2.2797	2.65695	0.0083669	0.0607539	-2.60611	PASK	protein_coding	ns
ENSG00000070731.10	0.370743	2.83331	2.65685	0.00836936	0.0607539	-2.66231	ST6GALNAC2	protein_coding	ns
ENSG00000130741.11	-0.0897917	8.51481	-2.65656	0.00837626	0.0607539	-2.88132	EIF2S3	protein_coding	ns
ENSG00000114062.19	-0.0743174	6.57813	-2.65652	0.00837731	0.0607539	-2.89892	UBE3A	protein_coding	ns
ENSG00000171566.12	-0.0773262	4.41879	-2.65625	0.0083838	0.0607676	-2.78581	PLRG1	protein_coding	ns
ENSG00000146281.6	0.118133	2.68244	2.65588	0.00839267	0.0607985	-2.64596	PM20D2	protein_coding	ns
ENSG00000078237.7	-0.106656	4.60134	-2.65454	0.00842521	0.0610007	-2.82123	TIGAR	protein_coding	ns
ENSG00000111880.16	0.0939894	3.97444	2.65322	0.00845734	0.0611866	-2.77656	RNGTT	protein_coding	ns
ENSG00000167261.14	0.121046	5.83182	2.65294	0.00846417	0.0611866	-2.90587	DPEP2	protein_coding	ns
ENSG00000212802.4	-0.165013	1.8577	-2.65266	0.00847099	0.0611866	-2.5949	RPL15P3	processed_pseudogene	ns
ENSG00000204161.14	0.281497	2.21438	2.6526	0.00847261	0.0611866	-2.61853	TMEM273	protein_coding	ns
ENSG00000186283.14	-0.116246	4.96458	-2.65244	0.00847634	0.0611866	-2.83628	TOR3A	protein_coding	ns
ENSG00000163563.8	0.139596	9.31542	2.65235	0.0084787	0.0611866	-2.86995	MNDA	protein_coding	ns
ENSG00000069956.12	-0.109807	5.3289	-2.65214	0.00848388	0.0611906	-2.84582	MAPK6	protein_coding	ns
ENSG00000107443.16	-0.096091	4.14524	-2.65194	0.00848876	0.0611923	-2.78407	CCNJ	protein_coding	ns
ENSG00000101367.9	-0.0615439	7.08228	-2.65133	0.00850358	0.0612392	-2.91317	MAPRE1	protein_coding	ns
ENSG00000118655.6	-0.0861684	3.82059	-2.65129	0.00850454	0.0612392	-2.74692	DCLRE1B	protein_coding	ns
ENSG00000198130.16	0.148874	2.21257	2.65069	0.00851933	0.0613122	-2.62108	HIBCH	protein_coding	ns
ENSG00000072778.20	-0.0995514	7.16538	-2.65016	0.00853238	0.0613727	-2.91218	ACADVL	protein_coding	ns
ENSG00000141564.15	0.0964558	5.10124	2.6497	0.0085436	0.0613739	-2.87047	RPTOR	protein_coding	ns
ENSG00000272717.1	-0.323012	0.636819	-2.64951	0.00854823	0.0613739	-2.62437	AC112236.2	antisense	ns
ENSG00000266028.7	-0.0668712	6.72488	-2.6493	0.00855346	0.0613739	-2.92174	SRGAP2	protein_coding	ns
ENSG00000155849.15	0.0796706	6.60023	2.64916	0.00855705	0.0613739	-2.9292	ELMO1	protein_coding	ns
ENSG00000156804.7	0.177525	2.35817	2.64908	0.00855902	0.0613739	-2.62958	FBXO32	protein_coding	ns
ENSG00000197217.13	0.0605693	6.19898	2.64902	0.00856044	0.0613739	-2.92609	ENTPD4	protein_coding	ns
ENSG00000189159.16	0.104148	5.11345	2.648	0.0085856	0.0615208	-2.87898	JPT1	protein_coding	ns
ENSG00000197451.12	-0.0788596	5.33073	-2.64745	0.00859924	0.0615851	-2.88026	HNRNPAB	protein_coding	ns
ENSG00000139687.15	-0.0764333	6.73234	-2.64671	0.00861746	0.0616821	-2.92051	RB1	protein_coding	ns
ENSG00000034152.18	0.13917	6.81295	2.64652	0.00862229	0.0616833	-2.9328	MAP2K3	protein_coding	ns
ENSG00000197841.15	0.143914	1.94828	2.64626	0.0086286	0.061695	-2.61904	ZNF181	protein_coding	ns
ENSG00000176783.15	0.0753144	5.65867	2.64559	0.00864547	0.0617821	-2.9014	RUFY1	protein_coding	ns
ENSG00000162736.17	-0.0833538	7.17565	-2.64515	0.00865628	0.0618206	-2.93147	NCSTN	protein_coding	ns
ENSG00000141452.9	0.0803074	4.70661	2.64499	0.00866023	0.0618206	-2.8623	RMC1	protein_coding	ns
ENSG00000134780.10	-0.181929	3.62676	-2.64461	0.00866982	0.0618557	-2.72135	DAGLA	protein_coding	ns
ENSG00000163956.12	-0.0742388	6.24559	-2.64412	0.00868196	0.0619088	-2.91661	LRPAP1	protein_coding	ns
ENSG00000143933.17	-0.107479	8.3706	-2.64237	0.00872579	0.0621878	-2.91555	CALM2	protein_coding	ns
ENSG00000047315.16	-0.0744418	6.60752	-2.64218	0.00873055	0.0621881	-2.9359	POLR2B	protein_coding	ns
ENSG00000215440.12	-0.0686521	6.06428	-2.64155	0.00874642	0.0622675	-2.92846	NPEPL1	protein_coding	ns
ENSG00000206053.13	0.104424	3.61252	2.63985	0.00878932	0.0625263	-2.76997	JPT2	protein_coding	ns
ENSG00000227825.4	-0.167079	4.64419	-2.63968	0.00879362	0.0625263	-2.8248	SLC9A7P1	transcribed_processed_pseudogene	ns
ENSG00000249859.10	0.140416	2.58157	2.63954	0.00879698	0.0625263	-2.67035	PVT1	lincRNA	ns
ENSG00000102898.12	0.108996	4.54481	2.6391	0.00880809	0.0625716	-2.85422	NUTF2	protein_coding	ns
ENSG00000283293.1	0.174595	14.4027	2.63869	0.00881846	0.0626115	-2.7666	RN7SK	snRNA	ns
ENSG00000167522.16	0.0644246	7.15881	2.63816	0.00883205	0.0626743	-2.95421	ANKRD11	protein_coding	ns
ENSG00000141504.11	-0.12644	4.20577	-2.63736	0.00885222	0.0627837	-2.79514	SAT2	protein_coding	ns
ENSG00000133872.13	0.0936804	7.88874	2.63615	0.00888323	0.0629698	-2.9486	SARAF	protein_coding	ns
ENSG00000091136.14	-0.173589	0.832031	-2.63545	0.00890105	0.0630622	-2.64459	LAMB1	protein_coding	ns
ENSG00000215039.6	0.146216	2.17908	2.63503	0.00891177	0.0630745	-2.65621	CD27-AS1	processed_transcript	ns
ENSG00000118680.13	-0.0790878	7.58174	-2.63467	0.0089209	0.0630745	-2.95294	MYL12B	protein_coding	ns
ENSG00000149480.7	-0.0619081	6.40049	-2.63463	0.00892184	0.0630745	-2.94697	MTA2	protein_coding	ns
ENSG00000250182.3	-0.147991	2.69072	-2.63458	0.00892334	0.0630745	-2.68033	EEF1A1P13	processed_pseudogene	ns
ENSG00000135842.17	0.196005	7.17055	2.63444	0.00892668	0.0630745	-2.96387	FAM129A	protein_coding	ns
ENSG00000111321.11	-0.0837698	6.20439	-2.63368	0.00894621	0.0631594	-2.94834	LTBR	protein_coding	ns
ENSG00000171865.10	-0.0865945	4.74452	-2.6336	0.00894826	0.0631594	-2.88536	RNASEH1	protein_coding	ns
ENSG00000130958.13	-0.0902257	4.02267	-2.6331	0.00896109	0.0632162	-2.81321	SLC35D2	protein_coding	ns
ENSG00000116251.11	-0.0643748	7.1144	-2.63177	0.00899535	0.0634239	-2.94393	RPL22	protein_coding	ns
ENSG00000115165.10	0.109254	7.39227	2.63111	0.00901252	0.0635111	-2.96582	CYTIP	protein_coding	ns
ENSG00000198887.9	-0.0574769	5.98857	-2.63075	0.00902173	0.063542	-2.94518	SMC5	protein_coding	ns
ENSG00000230124.8	0.0887099	4.33481	2.63029	0.00903377	0.0635929	-2.87148	ACBD6	protein_coding	ns
ENSG00000271425.8	-0.149922	5.98041	-2.62989	0.00904406	0.0636314	-2.95001	NBPF10	protein_coding	ns
ENSG00000115970.18	0.0776725	5.10518	2.62941	0.00905653	0.0636458	-2.92787	THADA	protein_coding	ns
ENSG00000279554.1	0.294992	-1.13847	2.62916	0.00906292	0.0636458	-2.91085	AC130448.2	TEC	ns
ENSG00000152229.18	-0.116344	5.88983	-2.62901	0.00906694	0.0636458	-2.95285	PSTPIP2	protein_coding	ns
ENSG00000174206.12	0.107785	2.71068	2.62892	0.00906917	0.0636458	-2.70673	C12orf66	protein_coding	ns
ENSG00000153107.13	0.0848893	5.04261	2.62867	0.00907557	0.0636458	-2.92543	ANAPC1	protein_coding	ns
ENSG00000238622.1	-0.494077	-0.166057	-2.62817	0.00908878	0.0636458	-2.7589	SNORD97	snoRNA	ns
ENSG00000169032.9	-0.0809256	6.45523	-2.62795	0.00909442	0.0636458	-2.96765	MAP2K1	protein_coding	ns
ENSG00000049656.14	-0.0486402	5.93623	-2.6279	0.00909578	0.0636458	-2.95847	CLPTM1L	protein_coding	ns
ENSG00000055211.14	-0.0822968	4.75939	-2.62774	0.00909978	0.0636458	-2.88727	GINM1	protein_coding	ns
ENSG00000111845.5	-0.0970813	2.53174	-2.62759	0.0091038	0.0636458	-2.69298	PAK1IP1	protein_coding	ns
ENSG00000197837.3	0.14469	3.02614	2.62758	0.00910408	0.0636458	-2.73637	HIST4H4	protein_coding	ns
ENSG00000136295.15	-0.128614	7.70974	-2.6273	0.00911125	0.0636458	-2.96277	TTYH3	protein_coding	ns
ENSG00000133302.13	0.124997	3.12695	2.62724	0.00911288	0.0636458	-2.76054	SLF1	protein_coding	ns
ENSG00000083642.19	-0.0752384	6.31792	-2.62721	0.00911361	0.0636458	-2.97191	PDS5B	protein_coding	ns
ENSG00000150477.15	0.119514	2.64027	2.62696	0.00912012	0.0636575	-2.70715	KIAA1328	protein_coding	ns
ENSG00000148700.14	0.0754811	7.39283	2.62668	0.00912741	0.0636748	-2.97705	ADD3	protein_coding	ns
ENSG00000138375.12	0.0879136	3.76188	2.62486	0.00917518	0.0639742	-2.81747	SMARCAL1	protein_coding	ns
ENSG00000126261.13	-0.0571008	5.86075	-2.62423	0.00919173	0.0640089	-2.95205	UBA2	protein_coding	ns
ENSG00000154016.13	0.171271	2.28748	2.62408	0.00919575	0.0640089	-2.6879	GRAP	protein_coding	ns
ENSG00000140563.15	0.265071	4.90049	2.624	0.00919784	0.0640089	-2.93181	MCTP2	protein_coding	ns
ENSG00000162734.12	-0.113929	6.7059	-2.62376	0.00920417	0.0640089	-2.97266	PEA15	protein_coding	ns
ENSG00000062485.19	-0.0815959	6.90634	-2.62375	0.0092044	0.0640089	-2.98253	CS	protein_coding	ns
ENSG00000135093.13	-0.110038	3.55519	-2.6232	0.00921875	0.0640749	-2.78336	USP30	protein_coding	ns
ENSG00000144134.18	0.121095	2.58844	2.62254	0.0092362	0.0641587	-2.70826	RABL2A	protein_coding	ns
ENSG00000187601.4	0.165458	1.4118	2.62229	0.00924275	0.0641587	-2.65419	MAGEH1	protein_coding	ns
ENSG00000162430.17	-0.111231	6.0671	-2.62219	0.00924539	0.0641587	-2.9315	SELENON	protein_coding	ns
ENSG00000165671.20	-0.0538553	7.91597	-2.62052	0.00928958	0.0644315	-2.98677	NSD1	protein_coding	ns
ENSG00000108064.11	-0.0948392	4.76687	-2.61909	0.00932779	0.0646435	-2.90287	TFAM	protein_coding	ns
ENSG00000122557.10	0.0581013	5.84572	2.61899	0.00933038	0.0646435	-2.98604	HERPUD2	protein_coding	ns
ENSG00000226471.6	0.222652	0.405251	2.61876	0.00933655	0.0646435	-2.68488	Z93930.2	antisense	ns
ENSG00000173276.14	-0.0885955	5.22511	-2.61852	0.00934297	0.0646435	-2.94856	ZBTB21	protein_coding	ns
ENSG00000188895.11	0.091295	7.27426	2.61846	0.00934463	0.0646435	-3.00412	MSL1	protein_coding	ns
ENSG00000125686.12	-0.0705668	6.4479	-2.61807	0.00935492	0.0646808	-3.00079	MED1	protein_coding	ns
ENSG00000213073.4	0.167628	2.88088	2.61732	0.00937498	0.0647855	-2.74911	AL353625.1	transcribed_processed_pseudogene	ns
ENSG00000149308.17	0.0977511	5.34231	2.61584	0.00941464	0.0650148	-2.97658	NPAT	protein_coding	ns
ENSG00000164442.10	-0.149428	6.38618	-2.61571	0.00941801	0.0650148	-2.99585	CITED2	protein_coding	ns
ENSG00000129675.16	-0.0701771	7.55966	-2.61552	0.00942314	0.0650158	-2.99834	ARHGEF6	protein_coding	ns
ENSG00000197579.8	0.0828204	5.23757	2.61534	0.00942801	0.0650158	-2.9676	TOPORS	protein_coding	ns
ENSG00000133858.15	-0.0709076	7.09556	-2.61453	0.00944993	0.0651329	-3.01059	ZFC3H1	protein_coding	ns
ENSG00000177989.13	-0.158258	6.47417	-2.61414	0.00946027	0.0651702	-2.9893	ODF3B	protein_coding	ns
ENSG00000186468.13	-0.098184	8.18949	-2.61305	0.00948982	0.0653178	-2.98965	RPS23	protein_coding	ns
ENSG00000174744.14	-0.0646655	4.25417	-2.61299	0.0094916	0.0653178	-2.8684	BRMS1	protein_coding	ns
ENSG00000122432.17	0.148692	2.18659	2.61171	0.00952621	0.0655219	-2.70327	SPATA1	protein_coding	ns
ENSG00000141367.11	-0.0838273	8.45859	-2.61112	0.00954224	0.065566	-2.99826	CLTC	protein_coding	ns
ENSG00000042062.12	0.141312	2.06926	2.61093	0.00954741	0.065566	-2.69761	RIPOR3	protein_coding	ns
ENSG00000095015.6	-0.0848138	8.74948	-2.61092	0.00954753	0.065566	-2.99135	MAP3K1	protein_coding	ns
ENSG00000125944.20	-0.0569693	6.4613	-2.60997	0.00957343	0.0657097	-3.01169	HNRNPR	protein_coding	ns
ENSG00000130066.16	-0.127251	9.06196	-2.60969	0.00958109	0.0657199	-2.98435	SAT1	protein_coding	ns
ENSG00000136758.18	-0.0540487	7.20155	-2.60955	0.00958488	0.0657199	-3.01767	YME1L1	protein_coding	ns
ENSG00000158417.11	-0.0918629	4.97819	-2.60917	0.00959519	0.0657402	-2.96476	EIF5B	protein_coding	ns
ENSG00000069424.14	-0.0857089	7.34198	-2.60908	0.0095978	0.0657402	-3.02462	KCNAB2	protein_coding	ns
ENSG00000122068.13	-0.0678975	6.08659	-2.60847	0.00961455	0.0657991	-2.99863	FYTTD1	protein_coding	ns
ENSG00000167380.16	0.108131	2.94968	2.6084	0.00961637	0.0657991	-2.78455	ZNF226	protein_coding	ns
ENSG00000221838.9	-0.108539	2.83649	-2.608	0.00962742	0.0658406	-2.76015	AP4M1	protein_coding	ns
ENSG00000068400.13	-0.0789382	5.11813	-2.60774	0.00963447	0.0658547	-2.97178	GRIPAP1	protein_coding	ns
ENSG00000148358.19	-0.0684413	6.11929	-2.60747	0.00964188	0.0658712	-3.02308	GPR107	protein_coding	ns
ENSG00000091140.14	-0.0745824	5.26247	-2.60719	0.00964951	0.0658892	-2.97799	DLD	protein_coding	ns
ENSG00000168246.6	-0.0871751	3.4352	-2.60637	0.00967222	0.0660102	-2.82185	UBTD2	protein_coding	ns
ENSG00000121741.16	0.0523582	6.58874	2.6051	0.00970707	0.0661824	-3.03407	ZMYM2	protein_coding	ns
ENSG00000072364.13	-0.0570986	7.21012	-2.60509	0.00970749	0.0661824	-3.03636	AFF4	protein_coding	ns
ENSG00000170248.15	-0.0746812	7.51963	-2.6045	0.00972376	0.0662591	-3.02878	PDCD6IP	protein_coding	ns
ENSG00000275131.3	0.140026	3.4408	2.60378	0.00974346	0.0663591	-2.84531	AC241952.1	transcribed_unprocessed_pseudogene	ns
ENSG00000067066.17	0.0588735	7.45855	2.60233	0.00978377	0.0665841	-3.03884	SP100	protein_coding	ns
ENSG00000031823.14	0.0596117	5.11629	2.60209	0.00979046	0.0665841	-2.99223	RANBP3	protein_coding	ns
ENSG00000228253.1	-0.229314	7.08102	-2.60191	0.00979542	0.0665841	-2.94	MT-ATP8	protein_coding	ns
ENSG00000049541.11	-0.0778968	3.57597	-2.60187	0.00979667	0.0665841	-2.84872	RFC2	protein_coding	ns
ENSG00000269609.5	0.130515	2.61044	2.60142	0.00980928	0.0666355	-2.76766	RPARP-AS1	processed_transcript	ns
ENSG00000174231.17	-0.091025	8.30231	-2.60071	0.009829	0.0667043	-3.03002	PRPF8	protein_coding	ns
ENSG00000122884.12	-0.0818972	4.87196	-2.60068	0.00982975	0.0667043	-2.94159	P4HA1	protein_coding	ns
ENSG00000261338.2	0.135446	2.32311	2.60051	0.00983458	0.0667043	-2.74149	AC021016.2	sense_overlapping	ns
ENSG00000135720.13	-0.076121	6.24352	-2.59977	0.00985521	0.0668099	-3.04347	DYNC1LI2	protein_coding	ns
ENSG00000111348.9	0.0771528	9.66174	2.59904	0.00987558	0.0669033	-2.99865	ARHGDIB	protein_coding	ns
ENSG00000204574.13	-0.0756241	5.19541	-2.59892	0.00987912	0.0669033	-3.00087	ABCF1	protein_coding	ns
ENSG00000267002.3	0.146637	2.6108	2.5987	0.00988522	0.066906	-2.77136	AC060780.1	lincRNA	ns
ENSG00000185261.14	0.225558	2.64983	2.59854	0.00988966	0.066906	-2.78226	KIAA0825	protein_coding	ns
ENSG00000182197.11	-0.0957359	5.36384	-2.59804	0.00990373	0.0669626	-3.00465	EXT1	protein_coding	ns
ENSG00000126698.11	-0.0783558	5.77142	-2.5976	0.00991621	0.0669626	-3.01176	DNAJC8	protein_coding	ns
ENSG00000097021.19	0.19545	0.888866	2.59748	0.00991936	0.0669626	-2.71972	ACOT7	protein_coding	ns
ENSG00000235552.4	-0.150468	2.08689	-2.59737	0.00992264	0.0669626	-2.72812	RPL6P27	transcribed_processed_pseudogene	ns
ENSG00000186594.14	-0.130084	5.74119	-2.59734	0.00992339	0.0669626	-2.98903	MIR22HG	lincRNA	ns
ENSG00000077420.16	0.0893248	7.25185	2.59709	0.00993044	0.0669759	-3.05472	APBB1IP	protein_coding	ns
ENSG00000225871.2	0.216123	1.11292	2.59623	0.00995481	0.0671042	-2.71029	AC245100.2	processed_pseudogene	ns
ENSG00000258504.2	-0.444329	-1.49121	-2.59606	0.00995963	0.0671042	-2.93996	AL157871.1	lincRNA	ns
ENSG00000136231.14	0.22062	1.78605	2.59573	0.00996895	0.0671327	-2.71885	IGF2BP3	protein_coding	ns
ENSG00000260233.3	0.161009	1.4645	2.59523	0.00998297	0.0671443	-2.71254	SSSCA1-AS1	processed_transcript	ns
ENSG00000079739.17	-0.102113	4.43567	-2.59523	0.00998299	0.0671443	-2.9456	PGM1	protein_coding	ns
ENSG00000172819.17	0.156839	3.24731	2.59513	0.00998593	0.0671443	-2.83052	RARG	protein_coding	ns
ENSG00000206560.11	0.211143	4.12424	2.59424	0.0100112	0.06728	-2.93071	ANKRD28	protein_coding	ns
ENSG00000243414.5	-0.138251	4.99854	-2.59348	0.0100327	0.0673898	-2.98525	TICAM2	protein_coding	ns
ENSG00000181991.16	0.069428	3.80118	2.59298	0.0100469	0.0674514	-2.9009	MRPS11	protein_coding	ns
ENSG00000177556.12	0.0824425	4.38085	2.5918	0.0100805	0.0676425	-2.96412	ATOX1	protein_coding	ns
ENSG00000071564.15	0.0936571	4.82513	2.59162	0.0100857	0.0676428	-3.00158	TCF3	protein_coding	ns
ENSG00000114125.14	-0.0960598	4.86436	-2.59131	0.0100945	0.0676675	-2.97858	RNF7	protein_coding	ns
ENSG00000101224.17	0.204266	3.93135	2.5903	0.0101236	0.0678279	-2.90838	CDC25B	protein_coding	ns
ENSG00000151650.8	-0.177593	4.1408	-2.58962	0.010143	0.0679235	-2.91502	VENTX	protein_coding	ns
ENSG00000174720.16	-0.0835379	4.64945	-2.5893	0.0101522	0.0679356	-2.96412	LARP7	protein_coding	ns
ENSG00000261716.2	0.156616	3.91044	2.5892	0.0101551	0.0679356	-2.9337	AC239868.1	transcribed_unprocessed_pseudogene	ns
ENSG00000112893.9	-0.0663529	6.97477	-2.5876	0.0102012	0.0681774	-3.07163	MAN2A1	protein_coding	ns
ENSG00000185477.5	0.160848	5.702	2.58758	0.0102016	0.0681774	-3.06674	GPRIN3	protein_coding	ns
ENSG00000172716.16	-0.0885152	6.67406	-2.58719	0.010213	0.0682192	-3.05922	SLFN11	protein_coding	ns
ENSG00000280332.1	0.162613	0.885646	2.58678	0.0102249	0.0682641	-2.73342	AC020917.4	TEC	ns
ENSG00000169964.8	0.0999192	2.28467	2.58649	0.0102331	0.0682845	-2.77208	TMEM42	protein_coding	ns
ENSG00000197601.13	-0.0845023	7.22874	-2.58612	0.0102438	0.0683215	-3.07526	FAR1	protein_coding	ns
ENSG00000163719.19	-0.0592964	6.46518	-2.58505	0.010275	0.0684656	-3.07469	MTMR14	protein_coding	ns
ENSG00000167985.6	0.0770077	4.40633	2.58502	0.0102758	0.0684656	-2.98732	SDHAF2	protein_coding	ns
ENSG00000100427.15	0.232606	1.98798	2.58473	0.0102842	0.068487	-2.75207	MLC1	protein_coding	ns
ENSG00000040199.18	0.122831	3.63913	2.58436	0.0102951	0.0685248	-2.90643	PHLPP2	protein_coding	ns
ENSG00000010803.16	0.0942552	3.23275	2.58397	0.0103065	0.0685621	-2.85209	SCMH1	protein_coding	ns
ENSG00000146143.18	0.0934234	2.6292	2.58381	0.0103111	0.0685621	-2.81038	PRIM2	protein_coding	ns
ENSG00000145287.10	0.175775	5.97181	2.58339	0.0103233	0.0686086	-3.07177	PLAC8	protein_coding	ns
ENSG00000073536.18	0.128298	1.99	2.58242	0.0103515	0.0687356	-2.76103	NLE1	protein_coding	ns
ENSG00000121039.10	-0.100091	2.45196	-2.58238	0.0103528	0.0687356	-2.78745	RDH10	protein_coding	ns
ENSG00000203326.11	0.168238	2.45785	2.58216	0.0103592	0.0687435	-2.79907	ZNF525	protein_coding	ns
ENSG00000149930.18	-0.0617482	5.60698	-2.58166	0.0103739	0.0687913	-3.067	TAOK2	protein_coding	ns
ENSG00000110717.13	0.100942	4.1244	2.58156	0.0103768	0.0687913	-2.96085	NDUFS8	protein_coding	ns
ENSG00000110583.13	0.098425	3.06618	2.5813	0.0103845	0.0688077	-2.85132	NAA40	protein_coding	ns
ENSG00000120733.14	-0.0692889	7.37909	-2.58097	0.0103939	0.0688353	-3.09318	KDM3B	protein_coding	ns
ENSG00000147050.14	0.136528	6.01018	2.5808	0.0103991	0.0688353	-3.08914	KDM6A	protein_coding	ns
ENSG00000159873.10	-0.0720823	5.21483	-2.58053	0.0104069	0.0688523	-3.04856	CCDC117	protein_coding	ns
ENSG00000228327.3	0.154779	5.58158	2.58016	0.0104178	0.0688902	-3.05541	AL669831.1	transcribed_unprocessed_pseudogene	ns
ENSG00000157593.19	-0.1037	4.35533	-2.57935	0.0104416	0.0690131	-2.98058	SLC35B2	protein_coding	ns
ENSG00000108654.14	-0.0788161	9.53366	-2.57899	0.0104524	0.0690497	-3.04862	DDX5	protein_coding	ns
ENSG00000136451.9	-0.0597506	6.8756	-2.5783	0.0104726	0.0691174	-3.10184	VEZF1	protein_coding	ns
ENSG00000163191.6	0.11968	7.03581	2.57811	0.0104782	0.0691174	-3.09356	S100A11	protein_coding	ns
ENSG00000109381.19	0.0679485	6.14788	2.57811	0.0104784	0.0691174	-3.09658	ELF2	protein_coding	ns
[truncated: 11,185 more rows]

## Sheet: Table_3 GBAviPD_GSEA
ID	Description	GeneRatio	BgRatio	pvalue	p.adjust	qvalue	geneID	Count	gene_reg	group
GO:0002181	cytoplasmic translation	39/699	156/18870	8.37206e-22	3.95329e-18	3.48101e-18	1973/6135/8661/6160/3646/2107/1981/8667/1983/6138/6129/6165/10492/6154/5315/25946/6202/6164/55364/6128/9349/7812/1660/51386/6207/7555/6201/6203/6189/6139/55854/8664/6152/6224/54505/6170/6218/6125/10605	39	down	GBA_PD
GO:0006413	translational initiation	26/699	123/18870	4.08257e-13	9.63896e-10	8.48746e-10	7458/1973/8661/3646/1981/8667/1978/1983/10657/4528/10959/55364/7812/51386/83939/9689/4869/6189/1975/8664/54915/54505/9470/6218/10605/1982	26	down	GBA_PD
GO:0006446	regulation of translational initiation	19/699	83/18870	1.38655e-10	2.18243e-07	1.92171e-07	7458/3646/1981/8667/1978/1983/10657/4528/10959/55364/7812/9689/4869/1975/54915/54505/9470/10605/1982	19	down	GBA_PD
GO:0007033	vacuole organization	29/699	232/18870	1.04756e-08	1.05739e-05	9.31068e-06	1200/2896/488/2548/84376/3074/411/83871/23673/10159/401548/1509/56270/51542/4669/55823/55207/8804/302/537/9296/57617/3073/83985/9897/84317/25782/8723/7805	29	down	GBA_PD
GO:0045727	positive regulation of translation	22/699	141/18870	1.11964e-08	1.05739e-05	9.31068e-06	23654/5935/3646/27230/1981/10492/6154/5315/10657/6659/55364/7812/1660/7555/4869/8664/54915/54505/6125/84271/10605/1982	22	down	GBA_PD
GO:0007040	lysosome organization	19/699	109/18870	1.75657e-08	1.18493e-05	1.04337e-05	1200/2896/2548/84376/3074/411/83871/10159/4669/55207/8804/537/9296/57617/3073/83985/9897/84317/7805	19	down	GBA_PD
GO:0080171	lytic vacuole organization	19/699	109/18870	1.75657e-08	1.18493e-05	1.04337e-05	1200/2896/2548/84376/3074/411/83871/10159/4669/55207/8804/537/9296/57617/3073/83985/9897/84317/7805	19	down	GBA_PD
GO:0016052	carbohydrate catabolic process	23/699	163/18870	3.66334e-08	2.16229e-05	1.90397e-05	4125/3099/4668/351/2023/2548/195827/5834/2760/3074/3643/5315/7167/5211/3101/5226/5230/2597/11182/5515/5566/4123/3073	23	down	GBA_PD
GO:0061615	glycolytic process through fructose-6-phosphate	9/699	24/18870	9.8977e-08	5.19299e-05	4.57262e-05	3099/2023/5315/7167/5211/3101/5230/5515/5566	9	down	GBA_PD
GO:0034250	positive regulation of amide metabolic process	22/699	169/18870	3.06659e-07	0.000144805	0.000127506	23654/5935/3646/27230/1981/10492/6154/5315/10657/6659/55364/7812/1660/7555/4869/8664/54915/54505/6125/84271/10605/1982	22	down	GBA_PD
GO:0048193	Golgi vesicle transport	30/699	294/18870	5.57929e-07	0.000224914	0.000198045	6643/3916/83871/29886/6272/1314/3064/51542/10959/5872/6845/9871/23074/201475/60684/377/26958/10564/10802/51014/5034/11014/80262/10434/7415/22820/51614/23163/7805/11031	30	down	GBA_PD
GO:0008380	RNA splicing	41/699	478/18870	5.71573e-07	0.000224914	0.000198045	5935/51428/3191/6830/3187/51634/56943/10492/284695/10657/6431/51329/9343/55660/79228/9879/8899/8882/1660/25980/6207/3181/4869/3185/9785/6651/23028/9444/988/3188/5515/10915/25949/10629/51362/27097/4116/4691/5725/26121/25962	41	down	GBA_PD
GO:0016050	vesicle organization	34/699	366/18870	8.95539e-07	0.000325287	0.000286427	26258/162/301/253832/84376/83871/23673/10159/3267/6272/9392/25946/23603/55823/5007/55207/10959/282991/5872/6845/8905/9871/201475/302/537/60684/11234/10564/10802/9839/7110/9296/57617/9897	34	down	GBA_PD
GO:0002183	cytoplasmic translational initiation	10/699	40/18870	1.41191e-06	0.000476216	0.000419325	1973/8661/3646/1981/8667/1983/55364/51386/8664/54505	10	down	GBA_PD
GO:0042254	ribosome biogenesis	31/699	325/18870	1.55314e-06	0.000488928	0.000430519	22803/6135/51187/26156/1983/6129/6165/6154/161424/9188/6202/26135/55027/6128/79039/29889/25983/6207/83939/6201/6203/4869/6189/6152/51118/54505/6218/51093/6125/55661/84273	31	down	GBA_PD
GO:0006735	NADH regeneration	7/699	18/18870	2.06828e-06	0.00054258	0.000477762	3099/2023/5315/7167/5211/3101/5230	7	down	GBA_PD
GO:0061621	canonical glycolysis	7/699	18/18870	2.06828e-06	0.00054258	0.000477762	3099/2023/5315/7167/5211/3101/5230	7	down	GBA_PD
GO:0061718	glucose catabolic process to pyruvate	7/699	18/18870	2.06828e-06	0.00054258	0.000477762	3099/2023/5315/7167/5211/3101/5230	7	down	GBA_PD
GO:0007041	lysosomal transport	18/699	134/18870	2.28616e-06	0.000568171	0.000500296	5660/4035/2896/3916/84376/411/6272/9392/51542/55823/55207/81609/6845/201475/57617/7415/23163/7805	18	down	GBA_PD
GO:0006096	glycolytic process	14/699	89/18870	4.69287e-06	0.0010617	0.000934865	3099/351/2023/195827/3643/5315/7167/5211/3101/5230/2597/11182/5515/5566	14	down	GBA_PD
GO:0061620	glycolytic process through glucose-6-phosphate	7/699	20/18870	4.72166e-06	0.0010617	0.000934865	3099/2023/5315/7167/5211/3101/5230	7	down	GBA_PD
GO:0016032	viral process	36/699	432/18870	5.38381e-06	0.00115556	0.00101751	821/8661/7342/3916/2219/253832/6520/10241/201626/1915/3643/55207/942/7812/7913/1660/5702/51386/972/8664/60559/3725/5034/1508/1642/57617/1605/3956/1105/10605/7415/6554/5725/339390/3609/4245	36	down	GBA_PD
GO:0019081	viral translation	7/699	21/18870	6.85662e-06	0.00140769	0.00123953	8661/7812/1660/51386/8664/10605/5725	7	down	GBA_PD
GO:0030641	regulation of cellular pH	14/699	93/18870	7.95558e-06	0.00156526	0.00137827	2896/11261/25932/10159/10479/8804/6522/537/506/23312/9296/144811/83985/84317	14	down	GBA_PD
GO:0006909	phagocytosis	24/699	237/18870	8.51116e-06	0.00160759	0.00141554	4035/301/3071/3684/2219/83871/9936/26060/2268/3689/3394/23603/55207/64005/6845/729230/5338/929/22918/5199/196527/1794/695/11031	24	down	GBA_PD
GO:0006665	sphingolipid metabolic process	19/699	162/18870	9.20228e-06	0.00166214	0.00146358	5660/51228/166929/2760/3074/221/9517/171546/253782/10087/51542/4669/5007/23683/55331/5515/8879/3073/427	19	down	GBA_PD
GO:2000767	positive regulation of cytoplasmic translation	6/699	15/18870	9.50398e-06	0.00166214	0.00146358	10492/5315/7812/1660/7555/10605	6	down	GBA_PD
GO:0050867	positive regulation of cell activation	33/699	396/18870	1.31973e-05	0.00215612	0.00189855	26258/301/5781/3071/3684/3916/6604/912/2268/3689/57178/6659/2316/114548/942/387/6845/729230/5321/10288/2547/972/3109/8741/1050/29117/4208/3956/11006/11221/3108/695/8723	33	down	GBA_PD
GO:0043484	regulation of RNA splicing	20/699	181/18870	1.32418e-05	0.00215612	0.00189855	5935/3191/3187/56943/284695/10657/6431/8882/6207/3181/4869/3185/6651/9444/3188/10629/27097/4116/4691/5725	20	down	GBA_PD
GO:0002696	positive regulation of leukocyte activation	32/699	380/18870	1.44249e-05	0.00224376	0.00197572	26258/301/5781/3071/3684/3916/6604/912/2268/3689/57178/6659/114548/942/387/6845/729230/5321/10288/2547/972/3109/8741/1050/29117/4208/3956/11006/11221/3108/695/8723	32	down	GBA_PD
GO:0001732	formation of cytoplasmic translation initiation complex	6/699	16/18870	1.47303e-05	0.00224376	0.00197572	8661/3646/8667/1983/51386/8664	6	down	GBA_PD
GO:0032418	lysosome localization	13/699	86/18870	1.59377e-05	0.00228054	0.0020081	3799/83871/2268/55207/282991/6845/23207/119032/2242/90809/401258/695/8723	13	down	GBA_PD
GO:1990849	vacuolar localization	13/699	86/18870	1.59377e-05	0.00228054	0.0020081	3799/83871/2268/55207/282991/6845/23207/119032/2242/90809/401258/695/8723	13	down	GBA_PD
GO:0090150	establishment of protein localization to membrane	26/699	280/18870	1.71727e-05	0.00238498	0.00210006	29927/11261/3684/5962/9804/57003/253832/55625/11231/83871/6747/3689/5621/196383/5018/537/56993/23787/80262/6727/93380/10434/23163/25782/4666/11031	26	down	GBA_PD
GO:0140467	integrated stress response signaling	9/699	42/18870	1.85607e-05	0.0025041	0.00220495	51776/2353/10959/55364/54870/1054/9935/3725/1050	9	down	GBA_PD
GO:2000765	regulation of cytoplasmic translation	8/699	33/18870	2.07788e-05	0.00272549	0.0023999	10492/5315/25946/55364/7812/1660/7555/10605	8	down	GBA_PD
GO:0043086	negative regulation of catalytic activity	37/699	480/18870	2.2817e-05	0.00284108	0.00250167	4035/55920/5859/1475/6135/5271/301/1471/1845/3071/11261/5962/11213/5269/6272/9314/23603/10959/9349/2950/729230/6201/5018/4869/331/2597/7453/1050/64793/84619/960/10527/6125/51035/11006/5576/11221	37	down	GBA_PD
GO:0051453	regulation of intracellular pH	13/699	89/18870	2.32532e-05	0.00284108	0.00250167	2896/11261/25932/10159/10479/8804/6522/537/506/23312/9296/83985/84317	13	down	GBA_PD
GO:0019080	viral gene expression	14/699	102/18870	2.34651e-05	0.00284108	0.00250167	821/8661/7342/7812/1660/5702/51386/8664/60559/3725/1105/10605/5725/4245	14	down	GBA_PD
GO:0006885	regulation of pH	14/699	103/18870	2.62468e-05	0.00302858	0.00266677	2896/11261/25932/10159/10479/8804/6522/537/506/23312/9296/144811/83985/84317	14	down	GBA_PD
GO:0007035	vacuolar acidification	8/699	34/18870	2.62964e-05	0.00302858	0.00266677	2896/25932/10159/8804/537/23312/9296/84317	8	down	GBA_PD
GO:0006090	pyruvate metabolic process	15/699	118/18870	3.06657e-05	0.0034477	0.00303583	3099/351/2023/195827/3643/5315/7167/5211/3101/5230/2597/11182/5515/5566/7416	15	down	GBA_PD
GO:0006007	glucose catabolic process	7/699	27/18870	4.31256e-05	0.00473579	0.00417004	3099/2023/5315/7167/5211/3101/5230	7	down	GBA_PD
GO:0000377	RNA splicing, via transesterification reactions with bulged adenosine as nucleophile	28/699	332/18870	4.75834e-05	0.00493479	0.00434526	5935/51428/3191/3187/51634/10492/10657/6431/9343/55660/9879/8899/1660/25980/3181/4869/3185/9785/6651/23028/9444/988/25949/51362/4116/4691/5725/26121	28	down	GBA_PD
GO:0000398	mRNA splicing, via spliceosome	28/699	332/18870	4.75834e-05	0.00493479	0.00434526	5935/51428/3191/3187/51634/10492/10657/6431/9343/55660/9879/8899/1660/25980/3181/4869/3185/9785/6651/23028/9444/988/25949/51362/4116/4691/5725/26121	28	down	GBA_PD
GO:0043300	regulation of leukocyte degranulation	9/699	47/18870	4.80729e-05	0.00493479	0.00434526	3071/3684/3916/2268/3689/6845/729230/2242/8723	9	down	GBA_PD
GO:0002504	antigen processing and presentation of peptide or polysaccharide antigen via MHC class II	8/699	37/18870	5.06869e-05	0.00509241	0.00448406	1520/1509/55207/10437/55016/972/3109/3108	8	down	GBA_PD
GO:1903131	mononuclear cell differentiation	36/699	481/18870	5.42538e-05	0.00533721	0.00469961	301/3071/2353/6604/292/912/57178/64343/25831/3394/1499/6659/7226/114548/942/387/359948/729230/7528/10288/1054/2547/6522/972/9935/5153/7922/2242/3516/29117/3956/11006/1794/11221/695/339390	36	down	GBA_PD
GO:0002697	regulation of immune effector process	31/699	389/18870	5.608e-05	0.00540428	0.00475867	2896/301/3071/3684/196/3916/2219/11213/6830/26060/912/3663/2268/3689/9188/114548/942/6845/729230/972/3109/8741/5199/2242/144811/11006/11221/695/339390/8723/7805	31	down	GBA_PD
GO:0007034	vacuolar transport	18/699	169/18870	5.76506e-05	0.00543702	0.0047875	5660/4035/2896/3916/84376/411/6272/9392/51542/55823/55207/81609/6845/201475/57617/7415/23163/7805	18	down	GBA_PD
GO:0000375	RNA splicing, via transesterification reactions	28/699	336/18870	5.87226e-05	0.00543702	0.0047875	5935/51428/3191/3187/51634/10492/10657/6431/9343/55660/9879/8899/1660/25980/3181/4869/3185/9785/6651/23028/9444/988/25949/51362/4116/4691/5725/26121	28	down	GBA_PD
GO:0046466	membrane lipid catabolic process	8/699	38/18870	6.21374e-05	0.00559456	0.00492622	4668/2760/3074/51542/55331/8879/3073/427	8	down	GBA_PD
GO:0042069	regulation of catecholamine metabolic process	6/699	20/18870	6.27937e-05	0.00559456	0.00492622	217/3684/7428/3689/5153/4929	6	down	GBA_PD
GO:0035751	regulation of lysosomal lumen pH	7/699	30/18870	8.97426e-05	0.00784359	0.00690657	2896/10159/8804/537/9296/83985/84317	7	down	GBA_PD
GO:0031400	negative regulation of protein modification process	33/699	437/18870	9.28153e-05	0.00784359	0.00690657	5859/10491/6135/1845/3071/11261/1981/11213/5621/1499/6659/23603/10959/55364/9349/2950/6201/4869/7453/6418/5515/1050/64793/84619/9373/10527/6125/51035/11006/84327/5576/11221/23075	33	down	GBA_PD
GO:1902600	proton transmembrane transport	17/699	160/18870	9.46618e-05	0.00784359	0.00690657	1537/1327/5250/11261/515/498/292/10159/10479/7388/51296/7384/537/506/9296/4540/509	17	down	GBA_PD
GO:0045621	positive regulation of lymphocyte differentiation	15/699	130/18870	9.51541e-05	0.00784359	0.00690657	301/3071/6604/57178/6659/114548/942/387/10288/2547/972/29117/11006/11221/695	15	down	GBA_PD
GO:0002274	myeloid leukocyte activation	22/699	241/18870	9.63422e-05	0.00784359	0.00690657	351/2896/301/3684/8754/2268/3689/945/4669/6845/729230/5321/972/22918/2242/1050/3516/401258/11006/1794/695/8723	22	down	GBA_PD
GO:0006643	membrane lipid metabolic process	20/699	209/18870	0.000103938	0.00831853	0.00732477	5660/4668/51228/166929/2760/3074/221/9517/171546/253782/10087/51542/4669/5007/23683/55331/5515/8879/3073/427	20	down	GBA_PD
GO:0042273	ribosomal large subunit biogenesis	11/699	76/18870	0.000106492	0.00838093	0.00737971	6135/51187/26156/6129/6165/6154/55027/6128/4869/6152/6125	11	down	GBA_PD
GO:0046365	monosaccharide catabolic process	9/699	52/18870	0.000110038	0.00848897	0.00747485	3099/2023/3074/5315/7167/5211/3101/5230/3073	9	down	GBA_PD
GO:0006887	exocytosis	28/699	349/18870	0.000112997	0.00848897	0.00747485	200081/26258/488/301/3071/3684/3916/2268/3689/55823/55207/4735/64005/5872/6845/729230/201475/302/60684/55255/10564/2242/57617/153339/401258/695/8723/11031	28	down	GBA_PD
GO:0007042	lysosomal lumen acidification	6/699	22/18870	0.000113456	0.00848897	0.00747485	2896/10159/8804/537/9296/84317	6	down	GBA_PD
GO:0005996	monosaccharide metabolic process	23/699	261/18870	0.000115056	0.00848897	0.00747485	4125/3099/2023/2519/2548/27230/3074/3636/3643/5315/29940/7167/5211/3101/5226/5230/2597/140710/11091/1642/5566/4123/3073	23	down	GBA_PD
GO:0022604	regulation of cell morphogenesis	22/699	247/18870	0.000137843	0.00980439	0.00863313	23654/301/5962/9202/3074/2268/3689/23136/4076/23603/55660/1729/23129/56965/23191/9204/2242/9373/960/51177/1605/23268	22	down	GBA_PD
GO:0009060	aerobic respiration	19/699	197/18870	0.000138493	0.00980439	0.00863313	1537/1327/3658/515/498/47/6472/387/7388/7384/4541/5018/506/2631/3419/4723/4540/7415/509	19	down	GBA_PD
GO:0030149	sphingolipid catabolic process	7/699	32/18870	0.000139114	0.00980439	0.00863313	2760/3074/51542/55331/8879/3073/427	7	down	GBA_PD
GO:0010506	regulation of autophagy	28/699	355/18870	0.000150679	0.0104633	0.00921333	5660/92140/5768/1981/292/90427/826/7428/9517/401548/10241/1915/3064/3162/29110/1459/1612/2597/55255/140710/10059/55486/219771/5566/25782/7416/8723/1982	28	down	GBA_PD
GO:1901873	regulation of post-translational protein modification	24/699	284/18870	0.000157065	0.0107487	0.00946461	10491/6135/11261/2873/9709/9188/1499/6659/9349/7913/91947/6201/4869/331/23028/6418/11091/9373/9318/9031/6125/51035/7415/7805	24	down	GBA_PD
GO:0006672	ceramide metabolic process	13/699	107/18870	0.000162833	0.0108296	0.00953584	166929/2760/3074/9517/171546/253782/10087/4669/55331/5515/8879/3073/427	13	down	GBA_PD
GO:1901796	regulation of signal transduction by p53 class mediator	13/699	107/18870	0.000162833	0.0108296	0.00953584	6135/6154/6659/25946/9349/6201/4869/972/23028/6224/960/6125/90809	13	down	GBA_PD
GO:0006605	protein targeting	27/699	339/18870	0.000167723	0.0109999	0.00968578	29927/6135/11261/3684/9804/253832/55625/11231/6747/3689/9709/6272/5621/51542/55823/9454/1459/10956/60559/56993/23787/55486/6727/23431/23163/4666/7805	27	down	GBA_PD
GO:0033238	regulation of amine metabolic process	7/699	33/18870	0.000170973	0.0110576	0.00973661	217/9056/3684/7428/3689/5153/4929	7	down	GBA_PD
GO:0050821	protein stabilization	20/699	217/18870	0.000173287	0.0110576	0.00973661	10491/2896/6135/10694/11261/3916/7428/23673/908/6659/2316/9349/10437/6201/4869/2597/6125/84327/6400/1500	20	down	GBA_PD
GO:1902107	positive regulation of leukocyte differentiation	18/699	185/18870	0.000184339	0.0111466	0.00981502	301/3071/2353/6604/7071/57178/6659/114548/942/387/10288/2547/972/2242/29117/11006/11221/695	18	down	GBA_PD
GO:1903708	positive regulation of hemopoiesis	18/699	185/18870	0.000184339	0.0111466	0.00981502	301/3071/2353/6604/7071/57178/6659/114548/942/387/10288/2547/972/2242/29117/11006/11221/695	18	down	GBA_PD
GO:0002263	cell activation involved in immune response	25/699	305/18870	0.000186052	0.0111466	0.00981502	4035/351/2896/301/3071/3684/3916/6830/2268/3689/3394/114548/942/6845/729230/972/3109/8741/2242/401258/3956/1794/695/23075/8723	25	down	GBA_PD
GO:0032479	regulation of type I interferon production	14/699	123/18870	0.000186485	0.0111466	0.00981502	5781/3663/3394/5966/91947/1660/7528/29110/331/2597/929/3654/63906/85364	14	down	GBA_PD
GO:0032606	type I interferon production	14/699	123/18870	0.000186485	0.0111466	0.00981502	5781/3663/3394/5966/91947/1660/7528/29110/331/2597/929/3654/63906/85364	14	down	GBA_PD
GO:0043299	leukocyte degranulation	11/699	81/18870	0.000190704	0.0112563	0.00991158	3071/3684/3916/2268/3689/6845/729230/2242/401258/695/8723	11	down	GBA_PD
GO:0016197	endosomal transport	22/699	253/18870	0.000194462	0.0113205	0.00996813	7813/6643/57182/23673/401548/29886/6272/57589/23603/51542/55207/282991/81609/5872/23074/201475/537/7415/23163/23085/9897/8723	22	down	GBA_PD
GO:0002221	pattern recognition receptor signaling pathway	21/699	236/18870	0.000196587	0.0113205	0.00996813	23151/2219/11213/1520/57590/26060/834/4669/114548/51296/26065/29110/331/929/5515/81570/3654/63906/144811/85364/695	21	down	GBA_PD
GO:0008360	regulation of cell shape	15/699	140/18870	0.00021891	0.0124541	0.0109663	23654/301/5962/3074/2268/3689/23136/55660/1729/23129/23191/2242/51177/1605/23268	15	down	GBA_PD
GO:1903037	regulation of leukocyte cell-cell adhesion	29/699	382/18870	0.00022202	0.0124656	0.0109764	301/1845/5781/3071/6604/912/3689/57178/9314/5621/6659/114548/942/387/729230/10288/6522/972/3109/960/3654/9306/29117/3956/11006/11221/3108/339390/7805	29	down	GBA_PD
GO:0022411	cellular component disassembly	35/699	497/18870	0.000224391	0.0124656	0.0109764	4035/3099/488/1471/1845/2107/3799/3684/5962/6604/11213/1520/292/401548/10241/56270/3643/3064/822/1073/51542/2314/4528/9349/23271/1459/10226/79752/6418/10059/55486/11198/7415/23075/7416	35	down	GBA_PD
GO:0016055	Wnt signaling pathway	33/699	459/18870	0.000231467	0.0127091	0.0111909	4035/351/80351/23168/8321/10159/151195/9314/1499/6659/84328/387/5204/100113407/1459/331/9646/9839/5515/3516/1642/9275/219771/29117/8932/2535/55182/10927/6801/84327/7415/1500/4929	33	down	GBA_PD
GO:0043302	positive regulation of leukocyte degranulation	6/699	25/18870	0.00024492	0.0130947	0.0115304	3684/3916/2268/3689/6845/8723	6	down	GBA_PD
GO:0031349	positive regulation of defense response	34/699	480/18870	0.000246717	0.0130947	0.0115304	84034/351/2896/23151/3916/2219/11213/1520/57590/26060/912/834/4669/114548/6845/51296/729230/1660/26065/29110/2547/331/929/5515/1050/81570/3654/63906/144811/85364/4208/3956/695/8723	34	down	GBA_PD
GO:0198738	cell-cell signaling by wnt	33/699	461/18870	0.000250479	0.0130947	0.0115304	4035/351/80351/23168/8321/10159/151195/9314/1499/6659/84328/387/5204/100113407/1459/331/9646/9839/5515/3516/1642/9275/219771/29117/8932/2535/55182/10927/6801/84327/7415/1500/4929	33	down	GBA_PD
GO:0002495	antigen processing and presentation of peptide antigen via MHC class II	7/699	35/18870	0.000252355	0.0130947	0.0115304	1520/1509/10437/55016/972/3109/3108	7	down	GBA_PD
GO:1902253	regulation of intrinsic apoptotic signaling pathway by p53 class mediator	7/699	35/18870	0.000252355	0.0130947	0.0115304	6135/6154/25946/6201/972/23028/960	7	down	GBA_PD
GO:0009895	negative regulation of catabolic process	27/699	349/18870	0.000268007	0.0137558	0.0121125	6135/1471/5768/3658/1981/11213/55625/90427/8667/7428/10492/57589/2316/9349/3162/7812/1660/1459/302/6201/51582/5515/5566/6125/51035/10605/1982	27	down	GBA_PD
GO:2000107	negative regulation of leukocyte apoptotic process	11/690	59/18870	8.14986e-06	0.0130809	0.0126694	6480/6352/598/3579/94103/3707/604/27086/22920/84941/596	11	up	GBA_PD
GO:0006644	phospholipid metabolic process	32/690	375/18870	8.50186e-06	0.0130809	0.0126694	81579/20/6622/8818/5335/57153/3632/94103/472/3707/129642/4204/10554/63874/5305/145567/128869/1154/9588/132001/8398/6609/26751/1606/2171/51205/55529/5333/5336/9488/8760/114879	32	up	GBA_PD
GO:0071459	protein localization to chromosome, centromeric region	9/690	40/18870	1.0964e-05	0.0130809	0.0126694	8970/8364/51112/9184/8370/8360/3012/9735/8366	9	up	GBA_PD
GO:0045069	regulation of viral genome replication	13/690	85/18870	1.21994e-05	0.0130809	0.0126694	6352/3669/10581/6733/8519/9683/103/9636/56829/3434/60489/596/51495	13	up	GBA_PD
GO:0006650	glycerophospholipid metabolic process	27/690	298/18870	1.47175e-05	0.0130809	0.0126694	8818/5335/57153/3632/472/3707/129642/4204/10554/63874/5305/145567/128869/1154/9588/132001/8398/26751/1606/2171/51205/55529/5333/5336/9488/8760/114879	27	up	GBA_PD
GO:0045333	cellular respiration	21/699	243/18870	0.000293135	0.0145274	0.0127919	1537/1327/5339/3658/515/498/51542/47/6472/387/7388/7384/4541/5018/506/2631/3419/4723/4540/7415/509	21	down	GBA_PD
GO:0071826	protein-RNA complex organization	21/699	243/18870	0.000293135	0.0145274	0.0127919	6135/8661/3646/3799/8667/1983/51634/6431/6128/9879/1660/51386/25980/79752/8664/6152/54505/11051/6125/7415/26121	21	down	GBA_PD
GO:1902165	regulation of intrinsic apoptotic signaling pathway in response to DNA damage by p53 class mediator	5/699	17/18870	0.000293501	0.0145274	0.0127919	6154/25946/972/23028/960	5	down	GBA_PD
GO:0002886	regulation of myeloid leukocyte mediated immunity	9/699	59/18870	0.000298423	0.0145274	0.0127919	3684/2268/3689/9188/6845/729230/2242/695/8723	9	down	GBA_PD
GO:0031122	cytoplasmic microtubule organization	9/699	59/18870	0.000298423	0.0145274	0.0127919	11261/55704/84376/1778/387/7461/23271/10844/9748	9	down	GBA_PD
GO:0032481	positive regulation of type I interferon production	10/699	72/18870	0.000307247	0.0148043	0.0130357	5781/3663/91947/1660/29110/331/2597/929/3654/85364	10	down	GBA_PD
GO:0030098	lymphocyte differentiation	31/699	429/18870	0.000324915	0.0154975	0.0136461	301/3071/6604/292/912/57178/25831/3394/1499/6659/114548/942/387/359948/729230/7528/10288/1054/2547/6522/972/9935/7922/3516/29117/3956/11006/1794/11221/695/339390	31	down	GBA_PD
GO:0008333	endosome to lysosome transport	10/699	73/18870	0.000344403	0.0162627	0.0143199	84376/6272/9392/55823/55207/81609/6845/201475/57617/7415	10	down	GBA_PD
GO:0006368	transcription elongation by RNA polymerase II	13/699	116/18870	0.000365004	0.0167335	0.0147344	23168/6830/7428/56943/2071/1499/57117/6917/9646/2962/10915/11198/85403	13	down	GBA_PD
GO:0019882	antigen processing and presentation	13/699	116/18870	0.000365004	0.0167335	0.0147344	968/1520/83871/912/1509/55207/10437/55016/10288/972/3109/54915/3108	13	down	GBA_PD
GO:0045582	positive regulation of T cell differentiation	13/699	116/18870	0.000365004	0.0167335	0.0147344	301/3071/6604/57178/6659/114548/942/387/10288/972/29117/11006/11221	13	down	GBA_PD
GO:0006991	response to sterol depletion	5/699	18/18870	0.000394061	0.0177215	0.0156044	55160/10959/83939/90809/10613	5	down	GBA_PD
GO:0009313	oligosaccharide catabolic process	5/699	18/18870	0.000394061	0.0177215	0.0156044	4125/2760/3074/5226/4123	5	down	GBA_PD
GO:0006334	nucleosome assembly	15/690	118/18870	2.64102e-05	0.0161892	0.0156799	8970/8364/8357/8354/23523/8343/8370/64754/8360/8339/8968/8344/8342/8366/25842	15	up	GBA_PD
GO:0045071	negative regulation of viral genome replication	10/690	55/18870	2.6416e-05	0.0161892	0.0156799	6352/3669/10581/6733/8519/9683/9636/56829/3434/60489	10	up	GBA_PD
GO:0061644	protein localization to CENP-A containing chromatin	6/690	18/18870	2.9789e-05	0.0161892	0.0156799	8970/8364/8370/8360/3012/8366	6	up	GBA_PD
GO:2000106	regulation of leukocyte apoptotic process	13/690	93/18870	3.27864e-05	0.0161892	0.0156799	6480/6352/598/25865/3579/94103/3707/604/27086/22920/84941/84524/596	13	up	GBA_PD
GO:0006119	oxidative phosphorylation	15/699	148/18870	0.000400867	0.0178575	0.0157242	1537/1327/515/498/6472/387/7388/7384/4541/506/2631/4723/4540/7415/509	15	down	GBA_PD
GO:0044403	biological process involved in symbiotic interaction	25/699	322/18870	0.000423026	0.0186324	0.0164065	2519/3916/2219/253832/6520/1915/3643/55207/942/79228/5702/972/2597/3725/5034/1508/1642/57617/1605/3956/1105/10605/6554/339390/3609	25	down	GBA_PD
GO:0016239	positive regulation of macroautophagy	10/699	75/18870	0.000430007	0.0186324	0.0164065	292/9517/401548/10241/3064/3162/29110/25782/7416/8723	10	down	GBA_PD
GO:0043516	regulation of DNA damage response, signal transduction by p53 class mediator	7/699	38/18870	0.000430099	0.0186324	0.0164065	6154/6659/25946/4869/972/23028/960	7	down	GBA_PD
GO:0007159	leukocyte cell-cell adhesion	30/699	419/18870	0.000469675	0.0200478	0.0176528	301/1845/5781/3071/6604/912/3689/57178/83706/9314/5621/6659/114548/942/387/729230/10288/6522/972/3109/960/3654/9306/29117/3956/11006/11221/3108/339390/7805	30	down	GBA_PD
GO:0043161	proteasome-mediated ubiquitin-dependent protein catabolic process	32/699	458/18870	0.000471264	0.0200478	0.0176528	821/6135/57003/8667/7428/9709/25831/23392/1499/84727/4669/5709/5682/25820/57092/5708/5702/5688/10956/5690/23190/9320/1050/9373/1642/26043/5887/51035/6400/10613/7415/201595	32	down	GBA_PD
GO:0002699	positive regulation of immune effector process	22/699	270/18870	0.000480447	0.0201874	0.0177758	301/3684/3916/2219/912/3663/2268/3689/9188/114548/942/6845/729230/972/3109/8741/5199/2242/144811/695/8723/7805	22	down	GBA_PD
GO:0006354	DNA-templated transcription elongation	14/699	135/18870	0.000490661	0.0201874	0.0177758	23168/6830/7428/56943/2071/284695/1499/57117/6917/9646/2962/10915/11198/85403	14	down	GBA_PD
GO:0001819	positive regulation of cytokine production	34/699	499/18870	0.000498594	0.0201874	0.0177758	1536/351/301/5781/2219/11213/10159/26060/3663/2268/834/9188/3394/114548/942/3162/729230/91947/1660/29110/10288/1054/331/972/2597/10564/929/10555/7110/3654/144811/85364/695/7805	34	down	GBA_PD
GO:0001821	histamine secretion	4/699	11/18870	0.000500197	0.0201874	0.0177758	6845/401258/695/8723	4	down	GBA_PD
GO:0070934	CRD-mediated mRNA stabilization	4/699	11/18870	0.000500197	0.0201874	0.0177758	10492/7812/1660/10605	4	down	GBA_PD
GO:0075522	IRES-dependent viral translational initiation	4/699	11/18870	0.000500197	0.0201874	0.0177758	8661/7812/8664/5725	4	down	GBA_PD
GO:0002764	immune response-regulating signaling pathway	34/699	500/18870	0.000516635	0.0204066	0.0179688	23151/1845/3071/2219/11213/1520/57590/26060/2268/834/945/10657/5621/4669/114548/64005/51296/26065/29110/10288/5338/331/929/123920/5515/81570/3654/63906/144811/85364/4208/11006/695/7805	34	down	GBA_PD
GO:0042176	regulation of protein catabolic process	27/699	364/18870	0.000518008	0.0204066	0.0179688	4035/6135/1471/5962/11213/8667/8754/1915/9709/25831/57589/2316/55823/5709/25820/5708/5702/302/51582/1050/7110/1642/5566/5887/51035/7415/23163	27	down	GBA_PD
GO:0042053	regulation of dopamine metabolic process	5/699	19/18870	0.000518592	0.0204066	0.0179688	217/3684/3689/5153/4929	5	down	GBA_PD
GO:0034728	nucleosome organization	16/690	138/18870	4.54535e-05	0.0186873	0.0180994	8970/8364/8357/8354/23523/8343/8370/64754/8360/8339/8968/8344/8342/4778/8366/25842	16	up	GBA_PD
GO:0046486	glycerolipid metabolic process	31/690	390/18870	4.62556e-05	0.0186873	0.0180994	8818/5335/57153/3632/9663/84649/472/3707/129642/4204/10554/63874/5305/145567/128869/1154/55750/9588/132001/8398/26751/1606/2171/51205/55529/80025/5333/5336/9488/8760/114879	31	up	GBA_PD
GO:0072599	establishment of protein localization to endoplasmic reticulum	8/699	51/18870	0.000529588	0.0206671	0.0181981	29927/11231/6747/9709/51542/60559/6727/25782	8	down	GBA_PD
GO:0042255	ribosome assembly	9/699	64/18870	0.000554951	0.0213793	0.0188253	6135/1983/6128/83939/4869/6152/54505/6125/84273	9	down	GBA_PD
GO:0002758	innate immune response-activating signaling pathway	21/699	255/18870	0.000556895	0.0213793	0.0188253	23151/2219/11213/1520/57590/26060/834/4669/114548/51296/26065/29110/331/929/5515/81570/3654/63906/144811/85364/695	21	down	GBA_PD
GO:0045088	regulation of innate immune response	30/699	425/18870	0.000593016	0.0225824	0.0198846	2896/23151/5781/3916/2219/11213/1520/57590/26060/912/2268/834/4669/114548/51296/1660/26065/29110/2547/331/929/5515/9470/81570/3654/63906/144811/85364/11221/695	30	down	GBA_PD
GO:0051251	positive regulation of lymphocyte activation	25/699	330/18870	0.000606475	0.0229102	0.0201733	26258/301/5781/3071/3916/6604/912/57178/6659/114548/942/387/729230/10288/2547/972/3109/8741/29117/4208/3956/11006/11221/3108/695	25	down	GBA_PD
GO:1903039	positive regulation of leukocyte cell-cell adhesion	22/699	275/18870	0.000615445	0.0230645	0.0203092	301/5781/3071/6604/912/3689/57178/6659/114548/942/387/729230/10288/972/3109/960/3654/29117/3956/11006/11221/3108	22	down	GBA_PD
GO:0002833	positive regulation of response to biotic stimulus	27/699	369/18870	0.000638156	0.0236497	0.0208244	84034/2896/23151/3916/2219/11213/1520/57590/26060/912/834/4669/114548/51296/1660/26065/29110/2547/331/929/5515/81570/3654/63906/144811/85364/695	27	down	GBA_PD
GO:0044000	movement in host	17/699	188/18870	0.000644924	0.0236497	0.0208244	2519/3916/2219/6520/3643/55207/942/972/5034/1508/1642/57617/1605/3956/6554/339390/3609	17	down	GBA_PD
GO:0002218	activation of innate immune response	22/699	276/18870	0.000646083	0.0236497	0.0208244	23151/2219/11213/1520/57590/26060/834/4669/114548/51296/26065/29110/2547/331/929/5515/81570/3654/63906/144811/85364/695	22	down	GBA_PD
GO:0070972	protein localization to endoplasmic reticulum	10/699	79/18870	0.000654646	0.0237787	0.0209381	29927/11231/6747/9709/51542/10956/60559/11014/6727/25782	10	down	GBA_PD
GO:1901798	positive regulation of signal transduction by p53 class mediator	6/699	30/18870	0.000701379	0.0252818	0.0222615	6135/6154/25946/9349/6201/6224	6	down	GBA_PD
GO:0017157	regulation of exocytosis	17/699	190/18870	0.000726945	0.0258601	0.0227708	488/301/3071/3684/3916/2268/3689/4735/5872/6845/729230/201475/302/55255/2242/57617/8723	17	down	GBA_PD
GO:1900152	negative regulation of nuclear-transcribed mRNA catabolic process, deadenylation-dependent decay	4/699	12/18870	0.000728376	0.0258601	0.0227708	10492/7812/1660/10605	4	down	GBA_PD
GO:0051348	negative regulation of transferase activity	19/699	225/18870	0.000741626	0.026134	0.0230119	5859/6135/1845/11261/11213/23603/9349/2950/6201/4869/7453/1050/64793/84619/10527/6125/11006/5576/11221	19	down	GBA_PD
GO:0051098	regulation of binding	21/699	262/18870	0.000791036	0.0276687	0.0243633	4035/351/64855/488/6135/3646/6612/1981/53339/1660/302/1054/23063/8664/23028/2962/9044/3725/5515/5566/55182	21	down	GBA_PD
GO:0071364	cellular response to epidermal growth factor stimulus	7/699	42/18870	0.000808784	0.0278068	0.0244849	1845/5781/2353/1915/8882/94056/4691	7	down	GBA_PD
GO:0002757	immune response-activating signaling pathway	32/699	473/18870	0.000812556	0.0278068	0.0244849	23151/1845/3071/2219/11213/1520/57590/26060/2268/834/10657/5621/4669/114548/64005/51296/26065/29110/5338/331/929/123920/5515/81570/3654/63906/144811/85364/4208/11006/695/7805	32	down	GBA_PD
GO:0022407	regulation of cell-cell adhesion	33/699	493/18870	0.00081265	0.0278068	0.0244849	84034/301/1845/5781/3071/5962/6604/912/3689/57178/83706/9314/5621/6659/114548/942/387/729230/10288/6522/972/3109/960/3654/9306/29117/3956/11006/11221/3108/23075/339390/7805	33	down	GBA_PD
GO:0015980	energy derivation by oxidation of organic compounds	25/699	337/18870	0.000820562	0.0278755	0.0245454	1537/1327/2548/5339/3658/515/498/5834/3643/51542/47/6472/387/7388/7384/4541/5018/7262/506/2631/3419/4723/4540/7415/509	25	down	GBA_PD
GO:0019886	antigen processing and presentation of exogenous peptide antigen via MHC class II	6/699	31/18870	0.000842772	0.0284255	0.0250297	1520/1509/10437/972/3109/3108	6	down	GBA_PD
GO:1903900	regulation of viral life cycle	16/690	143/18870	7.01139e-05	0.0259655	0.0251488	6352/3669/25893/10581/6733/8519/9683/103/9636/6609/56829/3434/60489/596/51495/79720	16	up	GBA_PD
GO:0046514	ceramide catabolic process	5/699	21/18870	0.000853449	0.0285815	0.025167	2760/3074/55331/3073/427	5	down	GBA_PD
GO:0002366	leukocyte activation involved in immune response	23/699	301/18870	0.000878426	0.0292108	0.0257212	2896/301/3071/3684/3916/6830/2268/3689/3394/114548/942/6845/729230/972/3109/8741/2242/401258/3956/1794/695/23075/8723	23	down	GBA_PD
GO:0051452	intracellular pH reduction	8/699	55/18870	0.00088932	0.0293662	0.025858	2896/25932/10159/8804/537/23312/9296/84317	8	down	GBA_PD
GO:0051701	biological process involved in interaction with host	18/699	211/18870	0.000899161	0.029485	0.0259626	2519/3916/2219/6520/3643/55207/942/79228/972/5034/1508/1642/57617/1605/3956/6554/339390/3609	18	down	GBA_PD
GO:0071216	cellular response to biotic stimulus	21/699	265/18870	0.000914883	0.0296734	0.0261285	968/92140/196/57003/11213/10270/8754/834/3394/114548/942/387/2950/10288/9646/929/9373/3654/4208/824/695	21	down	GBA_PD
GO:1901874	negative regulation of post-translational protein modification	11/699	97/18870	0.000917474	0.0296734	0.0261285	10491/6135/11261/1499/6659/9349/6201/6418/9373/6125/51035	11	down	GBA_PD
GO:0045619	regulation of lymphocyte differentiation	18/699	212/18870	0.000949562	0.0305023	0.0268584	301/3071/6604/57178/6659/114548/942/387/729230/10288/2547/6522/972/29117/11006/11221/695/339390	18	down	GBA_PD
GO:1902117	positive regulation of organelle assembly	10/699	83/18870	0.00096834	0.0308953	0.0272044	55704/401548/4076/1778/3064/387/23300/57472/25782/8723	10	down	GBA_PD
GO:0002275	myeloid cell activation involved in immune response	11/699	98/18870	0.000999661	0.0315167	0.0277516	2896/3684/2268/3689/6845/729230/2242/401258/1794/695/8723	11	down	GBA_PD
GO:0072594	establishment of protein localization to organelle	31/699	459/18870	0.00100116	0.0315167	0.0277516	968/3099/29927/10694/11261/3916/9804/11231/6747/26060/9709/6272/908/51542/2316/55823/55027/9349/8882/1459/5018/60559/56993/23787/55486/10527/6727/23163/25782/10526/7805	31	down	GBA_PD
GO:0050684	regulation of mRNA processing	13/699	129/18870	0.00100805	0.0315234	0.0277575	5935/3191/6830/10657/6431/1660/3181/4869/6651/9444/4116/4691/5725	13	down	GBA_PD
GO:0098761	cellular response to interleukin-7	4/699	13/18870	0.0010214	0.0317307	0.02794	506/5034/5887/695	4	down	GBA_PD
GO:0045089	positive regulation of innate immune response	25/699	343/18870	0.00105361	0.0324105	0.0285386	23151/3916/2219/11213/1520/57590/26060/912/834/4669/114548/51296/1660/26065/29110/2547/331/929/5515/81570/3654/63906/144811/85364/695	25	down	GBA_PD
GO:0002753	cytosolic pattern recognition receptor signaling pathway	14/699	146/18870	0.00106946	0.0324105	0.0285386	23151/57590/114548/51296/26065/29110/331/5515/81570/3654/63906/144811/85364/695	14	down	GBA_PD
GO:1903008	organelle disassembly	14/699	146/18870	0.00106946	0.0324105	0.0285386	3099/3799/292/401548/56270/3064/4528/1459/10226/79752/10059/55486/7415/7416	14	down	GBA_PD
GO:0009311	oligosaccharide metabolic process	9/699	70/18870	0.00107642	0.0324105	0.0285386	4125/4668/2548/2760/3074/2595/9526/5226/4123	9	down	GBA_PD
GO:0019320	hexose catabolic process	7/699	44/18870	0.0010776	0.0324105	0.0285386	3099/2023/5315/7167/5211/3101/5230	7	down	GBA_PD
GO:0044409	entry into host	15/699	163/18870	0.00109927	0.0326333	0.0287348	2519/3916/2219/6520/3643/942/972/5034/1508/57617/1605/3956/6554/339390/3609	15	down	GBA_PD
GO:0031647	regulation of protein stability	24/699	325/18870	0.0011007	0.0326333	0.0287348	10491/2896/6135/10694/11261/3916/7428/23673/908/3064/5621/6659/2316/55823/9349/10437/6201/4869/2597/6125/84327/6400/23163/1500	24	down	GBA_PD
GO:0032868	response to insulin	21/699	269/18870	0.00110575	0.0326333	0.0287348	3030/64397/5781/2353/9361/55625/26060/1509/6272/3636/3643/5315/6431/5872/23191/140710/94056/6464/4691/84327/11031	21	down	GBA_PD
GO:0019318	hexose metabolic process	19/699	233/18870	0.00112566	0.0330147	0.0290707	4125/3099/2023/2519/2548/27230/3636/3643/5315/7167/5211/3101/5230/2597/140710/11091/1642/5566/4123	19	down	GBA_PD
GO:0030433	ubiquitin-dependent ERAD pathway	10/699	85/18870	0.00116614	0.0338981	0.0298485	821/57003/9709/23392/10956/23190/6400/10613/7415/201595	10	down	GBA_PD
GO:0045580	regulation of T cell differentiation	16/699	181/18870	0.00117014	0.0338981	0.0298485	301/3071/6604/57178/6659/114548/942/387/729230/10288/6522/972/29117/11006/11221/339390	16	down	GBA_PD
GO:0010720	positive regulation of cell development	30/699	444/18870	0.00119111	0.0342952	0.0301982	1462/23654/64855/301/3071/2353/6604/7071/57178/4076/1499/6659/114548/942/387/23129/56965/10288/2547/23191/972/22902/23028/2242/1605/29117/11006/11221/695/1982	30	down	GBA_PD
GO:0016482	cytosolic transport	16/699	182/18870	0.00124006	0.0354722	0.0312346	7813/6643/3799/5962/3916/84376/29886/6272/57589/51542/2316/55823/55207/23074/23085/7805	16	down	GBA_PD
GO:0006888	endoplasmic reticulum to Golgi vesicle-mediated transport	13/699	132/18870	0.00124701	0.0354722	0.0312346	1314/10959/6845/9871/60684/26958/10802/51014/5034/11014/7415/22820/51614	13	down	GBA_PD
GO:0060759	regulation of response to cytokine stimulus	16/699	183/18870	0.00131348	0.0371393	0.0327026	5781/11213/28511/84888/834/9314/2950/1660/26065/29110/331/972/10555/9470/3654/7805	16	down	GBA_PD
GO:0032388	positive regulation of intracellular transport	17/699	201/18870	0.00135575	0.0377713	0.033259	11261/3684/5962/3689/1778/10657/5621/2316/55823/8882/1660/1459/302/79752/22902/5566/51614	17	down	GBA_PD
GO:0046512	sphingosine biosynthetic process	4/699	14/18870	0.0013883	0.0377713	0.033259	9517/171546/55331/427	4	down	GBA_PD
GO:0046520	sphingoid biosynthetic process	4/699	14/18870	0.0013883	0.0377713	0.033259	9517/171546/55331/427	4	down	GBA_PD
GO:0051608	histamine transport	4/699	14/18870	0.0013883	0.0377713	0.033259	6845/401258/695/8723	4	down	GBA_PD
GO:0098760	response to interleukin-7	4/699	14/18870	0.0013883	0.0377713	0.033259	506/5034/5887/695	4	down	GBA_PD
GO:0098876	vesicle-mediated transport to the plasma membrane	14/699	150/18870	0.0013886	0.0377713	0.033259	57182/83871/23673/401548/81609/5872/201475/537/10564/80262/10434/23163/8723/11031	14	down	GBA_PD
GO:0016236	macroautophagy	24/699	331/18870	0.00141056	0.0377713	0.033259	488/2548/5768/292/826/7428/9517/23673/401548/10241/1509/56270/3064/55207/3162/29110/2597/3964/9373/5566/7415/25782/7416/8723	24	down	GBA_PD
GO:0006984	ER-nucleus signaling pathway	7/699	46/18870	0.00141197	0.0377713	0.033259	488/57003/55160/10959/54870/83939/10613	7	down	GBA_PD
GO:0070849	response to epidermal growth factor	7/699	46/18870	0.00141197	0.0377713	0.033259	1845/5781/2353/1915/8882/94056/4691	7	down	GBA_PD
GO:0007162	negative regulation of cell adhesion	23/699	312/18870	0.00141582	0.0377713	0.033259	23654/7045/55920/301/1845/5781/3071/5962/9314/5621/23603/942/387/23129/10288/6522/972/506/9306/11006/23075/339390/7805	23	down	GBA_PD
GO:0002695	negative regulation of leukocyte activation	17/699	202/18870	0.00143076	0.0379554	0.0334211	2896/301/1845/3071/2268/945/5621/942/729230/10288/6522/972/9306/11006/695/339390/7805	17	down	GBA_PD
GO:0030099	myeloid cell differentiation	29/699	430/18870	0.00146788	0.0387225	0.0340966	351/5781/3071/2353/3658/7071/292/3394/1499/25946/51542/4669/2316/55027/302/1054/6522/972/537/9935/9646/5153/2242/1050/3516/81570/91/4208/11006	29	down	GBA_PD
GO:0071219	cellular response to molecule of bacterial origin	19/699	239/18870	0.00151514	0.0397472	0.0349989	968/92140/196/11213/10270/8754/834/3394/114548/942/387/2950/10288/9646/929/9373/3654/4208/824	19	down	GBA_PD
GO:0009201	ribonucleoside triphosphate biosynthetic process	12/699	119/18870	0.00154592	0.0403305	0.0355125	2023/515/498/4541/506/4831/4723/9556/4540/7415/509/83549	12	down	GBA_PD
GO:0045047	protein targeting to ER	7/699	47/18870	0.00160694	0.0416921	0.0367115	29927/11231/6747/9709/51542/60559/6727	7	down	GBA_PD
GO:0044090	positive regulation of vacuole organization	5/699	24/18870	0.00162605	0.0419573	0.036945	2896/401548/302/25782/8723	5	down	GBA_PD
GO:0072384	organelle transport along microtubule	10/699	89/18870	0.00166078	0.0426206	0.037529	26258/3799/3916/3064/282991/3281/119032/26958/23353/22820	10	down	GBA_PD
GO:0031331	positive regulation of cellular catabolic process	27/699	396/18870	0.00180362	0.0456802	0.0402231	351/92140/195827/292/8754/9517/401548/10241/10492/201626/4076/3643/3064/9337/3162/7812/1660/29110/1612/54915/57472/219771/10605/25782/7416/8723/7805	27	down	GBA_PD
GO:2001234	negative regulation of apoptotic signaling pathway	19/699	243/18870	0.00183394	0.0456802	0.0402231	5859/2023/23678/1495/292/8321/9709/3064/1499/25946/3162/2950/599/1459/972/23028/960/55486/4929	19	down	GBA_PD
GO:0032933	SREBP signaling pathway	4/699	15/18870	0.00183804	0.0456802	0.0402231	55160/10959/83939/10613	4	down	GBA_PD
GO:0051444	negative regulation of ubiquitin-protein transferase activity	4/699	15/18870	0.00183804	0.0456802	0.0402231	6135/9349/6201/6125	4	down	GBA_PD
GO:0072350	tricarboxylic acid metabolic process	4/699	15/18870	0.00183804	0.0456802	0.0402231	2746/3658/47/3419	4	down	GBA_PD
GO:1902166	negative regulation of intrinsic apoptotic signaling pathway in response to DNA damage by p53 class mediator	4/699	15/18870	0.00183804	0.0456802	0.0402231	25946/972/23028/960	4	down	GBA_PD
GO:0030219	megakaryocyte differentiation	10/690	66/18870	0.000132737	0.0434345	0.0420683	5196/10826/8364/5305/8370/2812/8360/222166/80739/8366	10	up	GBA_PD
GO:0071887	leukocyte apoptotic process	14/690	121/18870	0.000136832	0.0434345	0.0420683	6480/6352/598/25865/3579/94103/3707/604/27086/22920/84941/355/84524/596	14	up	GBA_PD
GO:0071222	cellular response to lipopolysaccharide	18/699	226/18870	0.00195131	0.0482311	0.0424693	968/92140/11213/10270/8754/834/3394/114548/942/387/2950/10288/9646/929/9373/3654/4208/824	18	down	GBA_PD
GO:0061951	establishment of protein localization to plasma membrane	8/699	62/18870	0.00196885	0.0482311	0.0424693	5962/83871/196383/537/80262/10434/23163/11031	8	down	GBA_PD
GO:0048143	astrocyte activation	5/699	25/18870	0.00197133	0.0482311	0.0424693	4035/351/2896/4669/9839	5	down	GBA_PD
GO:0016485	protein processing	19/699	245/18870	0.00201351	0.0487634	0.0429379	2023/10988/1368/1520/10159/834/5621/4669/302/331/5230/9935/60559/1522/5034/55486/5566/824/10939	19	down	GBA_PD
GO:0046718	viral entry into host cell	14/699	156/18870	0.00201373	0.0487634	0.0429379	3916/2219/6520/3643/942/972/5034/1508/57617/1605/3956/6554/339390/3609	14	down	GBA_PD
GO:1902105	regulation of leukocyte differentiation	23/699	321/18870	0.00204542	0.0491091	0.0432424	301/3071/2353/6604/7071/57178/1499/6659/114548/942/387/729230/10288/2547/6522/972/9935/2242/29117/11006/11221/695/339390	23	down	GBA_PD
GO:0048024	regulation of mRNA splicing, via spliceosome	11/699	107/18870	0.0020502	0.0491091	0.0432424	5935/3191/10657/6431/3181/4869/6651/9444/4116/4691/5725	11	down	GBA_PD
GO:0019884	antigen processing and presentation of exogenous antigen	7/699	49/18870	0.00205921	0.0491091	0.0432424	1520/912/1509/10437/972/3109/3108	7	down	GBA_PD

## Sheet: Table_4 LRRK2viPD_DEGs
ensembl	logFC	AveExpr	t	P.Value	adj.P.Val	B	gene_name	gene_type	gene_reg
ENSG00000125257.15	0.433071	3.18766	5.97702	7.35961e-09	6.30274e-05	9.7704	ABCC4	protein_coding	up
ENSG00000129353.15	0.365278	6.60406	5.92864	9.55033e-09	6.30274e-05	9.68228	SLC44A2	protein_coding	up
ENSG00000147604.14	-0.331348	8.78865	-5.74114	2.58455e-08	8.98725e-05	8.74005	RPL7	protein_coding	down
ENSG00000171310.11	0.180592	6.69511	5.73115	2.72362e-08	8.98725e-05	8.69305	CHST11	protein_coding	up
ENSG00000171552.13	0.529035	5.00217	5.63	4.61238e-08	0.000103439	8.19369	BCL2L1	protein_coding	up
ENSG00000125870.11	-0.1668	4.86796	-5.59364	5.5644e-08	0.000103439	8.01092	SNRPB2	protein_coding	down
ENSG00000159023.21	0.378677	7.48042	5.57776	6.03824e-08	0.000103439	7.94306	EPB41	protein_coding	up
ENSG00000197852.11	0.416923	4.73408	5.53419	7.54828e-08	0.000103439	7.73168	INKA2	protein_coding	up
ENSG00000116852.14	0.255763	5.42443	5.53361	7.57103e-08	0.000103439	7.73167	KIF21B	protein_coding	up
ENSG00000135439.11	0.296898	3.79626	5.52685	7.8369e-08	0.000103439	7.66965	AGAP2	protein_coding	up
ENSG00000118922.17	0.472675	4.66219	5.49612	9.16452e-08	0.000109966	7.55106	KLF12	protein_coding	up
ENSG00000165406.16	0.395021	6.06621	5.47321	1.02948e-07	0.000113235	7.44087	2025-03-08	protein_coding	up
ENSG00000077157.22	0.291416	5.42928	5.41406	1.38766e-07	0.00013846	7.16274	PPP1R12B	protein_coding	up
ENSG00000121104.8	0.355512	5.04742	5.39155	1.55362e-07	0.00013846	7.05811	FAM117A	protein_coding	up
ENSG00000137642.13	0.258108	9.67429	5.38901	1.57353e-07	0.00013846	7.0462	SORL1	protein_coding	up
ENSG00000122068.13	-0.14516	6.08659	-5.36425	1.78093e-07	0.000144847	6.92918	FYTTD1	protein_coding	down
ENSG00000172765.17	0.227911	5.00342	5.34281	1.9819e-07	0.000144847	6.83005	TMCC1	protein_coding	up
ENSG00000196663.16	0.281558	5.24022	5.34264	1.98358e-07	0.000144847	6.82818	TECPR2	protein_coding	up
ENSG00000180776.15	-0.301505	8.0191	-5.3326	2.08507e-07	0.000144847	6.78014	ZDHHC20	protein_coding	down
ENSG00000153560.12	-0.165708	6.48933	-5.29032	2.57116e-07	0.000169684	6.57999	UBP1	protein_coding	down
ENSG00000065413.20	0.196603	7.95715	5.23021	3.45599e-07	0.000217217	6.30395	ANKRD44	protein_coding	up
ENSG00000110063.10	0.19057	4.1221	5.21732	3.68118e-07	0.000220854	6.24862	DCPS	protein_coding	up
ENSG00000124635.8	0.570322	0.609565	5.18514	4.30686e-07	0.000226498	5.17534	HIST1H2BJ	protein_coding	up
ENSG00000106351.13	0.385062	1.85891	5.18255	4.36155e-07	0.000226498	5.749	AGFG2	protein_coding	up
ENSG00000104973.18	0.232069	5.466	5.16296	4.79702e-07	0.000226498	6.00142	MED25	protein_coding	up
ENSG00000127663.15	0.172376	6.43396	5.16085	4.84655e-07	0.000226498	5.98379	KDM4B	protein_coding	up
ENSG00000082146.13	0.557935	4.55111	5.15841	4.90425e-07	0.000226498	5.98549	STRADB	protein_coding	up
ENSG00000137198.9	0.739488	1.58636	5.14581	5.21276e-07	0.000226498	5.53381	GMPR	protein_coding	up
ENSG00000116151.14	0.293765	1.25789	5.14473	5.24012e-07	0.000226498	5.28846	MORN1	protein_coding	up
ENSG00000172716.16	-0.182667	6.67406	-5.13917	5.38306e-07	0.000226498	5.89155	SLFN11	protein_coding	down
ENSG00000265681.7	-0.291053	8.20841	-5.13861	5.39761e-07	0.000226498	5.89215	RPL17	protein_coding	down
ENSG00000013306.16	0.566473	5.56169	5.13505	5.49128e-07	0.000226498	5.87729	SLC25A39	protein_coding	up
ENSG00000073849.15	0.245053	5.98915	5.11963	5.91545e-07	0.000229726	5.80148	ST6GAL1	protein_coding	up
ENSG00000110876.9	0.280724	7.65295	5.11956	5.91763e-07	0.000229726	5.79945	SELPLG	protein_coding	up
ENSG00000100664.11	-0.172665	7.88218	-5.10807	6.25429e-07	0.000231934	5.74867	EIF5	protein_coding	down
ENSG00000090238.11	0.286271	6.36593	5.1057	6.32595e-07	0.000231934	5.73858	YPEL3	protein_coding	up
ENSG00000071082.11	-0.260715	8.31673	-5.0782	7.21913e-07	0.000257528	5.62058	RPL31	protein_coding	down
ENSG00000166200.15	-0.185342	6.06394	-5.04261	8.55729e-07	0.000293024	5.46276	COPS2	protein_coding	down
ENSG00000122783.16	0.190372	4.91952	5.03376	8.92571e-07	0.000293024	5.4244	CYREN	protein_coding	up
ENSG00000178234.13	0.143148	4.57724	5.03198	9.00171e-07	0.000293024	5.42162	GALNT11	protein_coding	up
ENSG00000140968.11	-0.205768	6.96483	-5.01242	9.87832e-07	0.000293024	5.32328	IRF8	protein_coding	down
ENSG00000072736.19	0.128619	6.88438	5.01229	9.88444e-07	0.000293024	5.31445	NFATC3	protein_coding	up
ENSG00000117758.14	-0.190858	6.34698	-5.00653	1.01582e-06	0.000293024	5.29735	STX12	protein_coding	down
ENSG00000136732.16	0.514737	4.90937	5.00072	1.04421e-06	0.000293024	5.2812	GYPC	protein_coding	up
ENSG00000120705.13	-0.155727	6.42404	-4.99722	1.06164e-06	0.000293024	5.25658	ETF1	protein_coding	down
ENSG00000126247.10	-0.205799	8.06094	-4.99445	1.07565e-06	0.000293024	5.2408	CAPNS1	protein_coding	down
ENSG00000204160.12	0.337825	5.72435	4.99118	1.09242e-06	0.000293024	5.22867	ZDHHC18	protein_coding	up
ENSG00000160588.10	0.299671	4.18352	4.99077	1.09453e-06	0.000293024	5.24098	MPZL3	protein_coding	up
ENSG00000160445.11	0.244764	5.14844	4.9881	1.10845e-06	0.000293024	5.22085	ZER1	protein_coding	up
ENSG00000133943.20	0.240788	5.72088	4.98371	1.13169e-06	0.000293024	5.19468	DGLUCY	protein_coding	up
ENSG00000143409.15	0.231519	4.98501	4.982	1.14087e-06	0.000293024	5.19598	MINDY1	protein_coding	up
ENSG00000022567.9	0.332972	4.89219	4.9795	1.15443e-06	0.000293024	5.18556	SLC45A4	protein_coding	up
ENSG00000073910.21	0.178677	7.22725	4.96913	1.21229e-06	0.000301906	5.12404	FRY	protein_coding	up
ENSG00000102096.9	0.406191	4.2162	4.96015	1.26462e-06	0.000305837	5.10743	PIM2	protein_coding	up
ENSG00000153879.9	-0.169797	5.43434	-4.95852	1.27442e-06	0.000305837	5.09484	CEBPG	protein_coding	down
ENSG00000197837.3	0.27744	3.02614	4.94753	1.34196e-06	0.000316296	5.00396	HIST4H4	protein_coding	up
ENSG00000145335.15	0.741909	3.79315	4.94076	1.38533e-06	0.000320788	5.01461	SNCA	protein_coding	up
ENSG00000196411.10	0.411628	2.5852	4.92504	1.49125e-06	0.000339362	4.86802	EPHB4	protein_coding	up
ENSG00000134108.13	-0.182724	6.59237	-4.91832	1.53891e-06	0.000344271	4.90589	ARL8B	protein_coding	down
ENSG00000003402.20	0.14165	8.4636	4.91235	1.5824e-06	0.000345367	4.88253	CFLAR	protein_coding	up
ENSG00000131389.17	0.178416	7.98403	4.9105	1.59613e-06	0.000345367	4.87085	SLC6A6	protein_coding	up
ENSG00000161970.14	-0.278951	8.51031	-4.89332	1.72933e-06	0.00036422	4.81262	RPL26	protein_coding	down
ENSG00000085449.15	-0.155983	6.75449	-4.89219	1.73845e-06	0.00036422	4.79329	WDFY1	protein_coding	down
ENSG00000128604.20	-0.259412	7.1297	-4.88649	1.78522e-06	0.000365205	4.76826	IRF5	protein_coding	down
ENSG00000135407.10	0.349981	1.59149	4.8849	1.7985e-06	0.000365205	4.4381	AVIL	protein_coding	up
ENSG00000170956.17	0.574849	2.72873	4.87978	1.84185e-06	0.000368343	4.68436	CEACAM3	protein_coding	up
ENSG00000180530.11	-0.268886	7.02114	-4.86284	1.99255e-06	0.000391085	4.67044	NRIP1	protein_coding	down
ENSG00000163346.17	0.233003	5.5471	4.85732	2.04414e-06	0.000391085	4.64404	PBXIP1	protein_coding	up
ENSG00000163964.14	0.182918	4.38742	4.85641	2.05281e-06	0.000391085	4.65873	PIGX	protein_coding	up
ENSG00000198876.13	0.424874	6.59668	4.85418	2.07409e-06	0.000391085	4.62631	DCAF12	protein_coding	up
ENSG00000008988.9	-0.164138	7.91584	-4.84704	2.14379e-06	0.000398534	4.60041	RPS20	protein_coding	down
ENSG00000267322.2	0.383962	2.69086	4.84188	2.19554e-06	0.000402485	4.53474	SNHG22	antisense	up
ENSG00000142784.16	0.199458	6.17812	4.83666	2.24907e-06	0.00040665	4.55056	WDTC1	protein_coding	up
ENSG00000180871.8	0.703382	4.3659	4.82769	2.34415e-06	0.000418113	4.53796	CXCR2	protein_coding	up
ENSG00000100784.12	0.258207	4.90352	4.81372	2.49989e-06	0.000439948	4.46852	RPS6KA5	protein_coding	up
ENSG00000103148.15	0.324917	4.60675	4.80753	2.57205e-06	0.000443186	4.45084	NPRL3	protein_coding	up
ENSG00000170385.10	-0.230349	6.68739	-4.8064	2.58545e-06	0.000443186	4.42406	SLC30A1	protein_coding	down
ENSG00000145687.16	0.172121	4.77088	4.79755	2.69266e-06	0.000455647	4.40283	SSBP2	protein_coding	up
ENSG00000162836.12	0.337831	1.92597	4.78774	2.81652e-06	0.000470573	4.1585	ACP6	protein_coding	up
ENSG00000150867.14	0.249076	7.3528	4.76434	3.13473e-06	0.000517191	4.23701	PIP4K2A	protein_coding	up
ENSG00000109475.16	-0.267038	7.85204	-4.75591	3.25751e-06	0.000529094	4.21879	RPL34	protein_coding	down
ENSG00000170759.11	-0.128301	7.28682	-4.7528	3.30412e-06	0.000529094	4.19414	KIF5B	protein_coding	down
ENSG00000180573.9	0.266713	6.41668	4.75057	3.3378e-06	0.000529094	4.18012	HIST1H2AC	protein_coding	up
ENSG00000071051.14	0.236222	4.24253	4.74864	3.36722e-06	0.000529094	4.20244	NCK2	protein_coding	up
ENSG00000163219.11	0.209426	6.14757	4.73174	3.63612e-06	0.000563011	4.101	ARHGAP25	protein_coding	up
ENSG00000183354.12	0.108717	6.26263	4.7298	3.66838e-06	0.000563011	4.09104	KIAA2026	protein_coding	up
ENSG00000100325.15	0.275766	5.4384	4.72695	3.71603e-06	0.000563518	4.08758	ASCC2	protein_coding	up
ENSG00000182899.16	-0.181718	7.28001	-4.72453	3.75707e-06	0.000563518	4.0816	RPL35A	protein_coding	down
ENSG00000113387.12	-0.155304	6.81228	-4.71942	3.84513e-06	0.000570245	4.05482	SUB1	protein_coding	down
ENSG00000174437.17	-0.190437	7.28495	-4.71574	3.90971e-06	0.000571424	4.03307	ATP2A2	protein_coding	down
ENSG00000147459.18	0.14302	7.86325	4.71406	3.93966e-06	0.000571424	4.02622	DOCK5	protein_coding	up
ENSG00000036054.13	-0.172962	5.23831	-4.70805	4.04825e-06	0.000571896	4.02099	TBC1D23	protein_coding	down
ENSG00000124243.17	0.327626	2.68271	4.70745	4.05919e-06	0.000571896	3.98108	BCAS4	protein_coding	up
ENSG00000054611.14	0.164195	5.55643	4.7067	4.0729e-06	0.000571896	4.00162	TBC1D22A	protein_coding	up
ENSG00000145425.10	-0.271604	9.27671	-4.70051	4.18849e-06	0.000581935	3.9866	RPS3A	protein_coding	down
ENSG00000131355.14	0.517133	4.91596	4.6956	4.28251e-06	0.000587618	3.96955	ADGRE3	protein_coding	up
ENSG00000080371.6	-0.101356	6.62599	-4.69258	4.34122e-06	0.000587618	3.93393	RAB21	protein_coding	down
ENSG00000065548.18	-0.183788	5.70724	-4.69039	4.38422e-06	0.000587618	3.94837	ZC3H15	protein_coding	down
ENSG00000105778.19	0.118668	6.0712	4.68922	4.40747e-06	0.000587618	3.92132	AVL9	protein_coding	up
ENSG00000129460.16	-0.157829	4.04436	-4.68232	4.54673e-06	0.000600123	3.92953	NGDN	protein_coding	down
ENSG00000162368.13	-0.142214	6.67682	-4.67623	4.67307e-06	0.000609556	3.87232	CMPK1	protein_coding	down
ENSG00000173868.11	0.531657	3.93843	4.67445	4.71056e-06	0.000609556	3.89682	PHOSPHO1	protein_coding	up
ENSG00000138434.17	-0.129197	7.40439	-4.66266	4.96694e-06	0.000636491	3.80943	ITPRID2	protein_coding	down
ENSG00000069943.10	0.184499	3.94312	4.65579	5.1224e-06	0.000644238	3.82009	PIGB	protein_coding	up
ENSG00000112195.9	0.368092	3.1533	4.65565	5.12548e-06	0.000644238	3.80705	TREML2	protein_coding	up
ENSG00000106415.13	0.290399	2.30207	4.65356	5.17382e-06	0.000644238	3.70176	GLCCI1	protein_coding	up
ENSG00000204103.4	-0.298492	7.59569	-4.65136	5.22504e-06	0.000644535	3.76971	MAFB	protein_coding	down
ENSG00000155749.12	0.455361	0.380307	4.64705	5.3269e-06	0.000646018	2.97618	ALS2CR12	protein_coding	up
ENSG00000146859.6	0.235431	4.71454	4.64521	5.371e-06	0.000646018	3.76098	TMEM140	protein_coding	up
ENSG00000124098.10	0.310971	5.85274	4.64467	5.38389e-06	0.000646018	3.73426	FAM210B	protein_coding	up
ENSG00000065559.15	0.172748	5.19949	4.63445	5.63577e-06	0.00066569	3.70869	MAP2K4	protein_coding	up
ENSG00000198918.8	-0.248722	7.68662	-4.63394	5.64871e-06	0.00066569	3.70534	RPL39	protein_coding	down
ENSG00000109062.12	0.237931	6.32624	4.63006	5.74745e-06	0.000671333	3.66953	SLC9A3R1	protein_coding	up
ENSG00000100296.13	0.134821	5.04164	4.61926	6.03091e-06	0.000698263	3.64505	THOC5	protein_coding	up
ENSG00000159346.13	0.249145	7.71875	4.60613	6.39394e-06	0.000731167	3.57538	ADIPOR1	protein_coding	up
ENSG00000137955.16	-0.188819	5.49376	-4.60501	6.42599e-06	0.000731167	3.59084	RABGGTB	protein_coding	down
ENSG00000204131.9	0.255263	7.69267	4.60308	6.48129e-06	0.000731167	3.56517	NHSL2	protein_coding	up
ENSG00000068366.19	-0.152744	7.35898	-4.59784	6.63404e-06	0.000742057	3.54286	ACSL4	protein_coding	down
ENSG00000121552.4	-0.231647	6.49642	-4.59336	6.76721e-06	0.000750591	3.54517	CSTA	protein_coding	down
ENSG00000105053.11	0.182744	4.77908	4.57664	7.28761e-06	0.000798574	3.47852	VRK3	protein_coding	up
ENSG00000230989.6	-0.174568	6.24904	-4.57561	7.32082e-06	0.000798574	3.46112	HSBP1	protein_coding	down
ENSG00000150637.9	0.712837	2.96111	4.57293	7.40811e-06	0.000801473	3.4654	CD226	protein_coding	up
ENSG00000114850.6	-0.152822	7.17083	-4.56852	7.55389e-06	0.000809625	3.42431	SSR3	protein_coding	down
ENSG00000117592.9	0.236625	6.27561	4.56557	7.65319e-06	0.000809625	3.40371	PRDX6	protein_coding	up
ENSG00000113575.10	-0.147587	7.04625	-4.56504	7.67101e-06	0.000809625	3.40553	PPP2CA	protein_coding	down
ENSG00000151327.12	0.194375	3.51988	4.56264	7.7529e-06	0.000809625	3.44134	FAM177A1	protein_coding	up
ENSG00000120742.11	-0.118389	7.61675	-4.56063	7.82179e-06	0.000809625	3.39212	SERP1	protein_coding	down
ENSG00000135250.17	0.157017	5.99526	4.55866	7.88999e-06	0.000809625	3.37903	SRPK2	protein_coding	up
ENSG00000116824.5	0.664373	1.13165	4.55801	7.91284e-06	0.000809625	3.07886	CD2	protein_coding	up
ENSG00000134758.14	-0.192069	5.80943	-4.55531	8.00752e-06	0.00081301	3.38359	RNF138	protein_coding	down
ENSG00000275379.1	0.378272	1.6415	4.54822	8.26179e-06	0.00082072	3.16334	HIST1H3I	protein_coding	up
ENSG00000137710.15	-0.156662	5.01145	-4.54639	8.32831e-06	0.00082072	3.36173	RDX	protein_coding	down
ENSG00000100307.13	0.22214	4.58411	4.54466	8.39212e-06	0.00082072	3.35441	CBX7	protein_coding	up
ENSG00000041357.16	-0.202918	6.42017	-4.54321	8.44567e-06	0.00082072	3.32672	PSMA4	protein_coding	down
ENSG00000132471.12	0.186485	6.36149	4.54294	8.45595e-06	0.00082072	3.32286	WBP2	protein_coding	up
ENSG00000131089.15	0.182481	3.28402	4.54292	8.45655e-06	0.00082072	3.35703	ARHGEF9	protein_coding	up
ENSG00000010818.10	0.316391	4.9847	4.53799	8.64213e-06	0.000830737	3.31504	HIVEP2	protein_coding	up
ENSG00000115758.13	0.294348	4.7746	4.53654	8.69703e-06	0.000830737	3.31638	ODC1	protein_coding	up
ENSG00000182923.17	0.197186	4.75654	4.5352	8.74858e-06	0.000830737	3.30965	CEP63	protein_coding	up
ENSG00000158856.18	1.16173	1.47652	4.53305	8.83145e-06	0.000832616	3.03271	DMTN	protein_coding	up
ENSG00000168014.16	0.155041	4.83823	4.53027	8.93998e-06	0.000836871	3.2894	C2CD3	protein_coding	up
ENSG00000170006.12	0.200035	8.25652	4.52722	9.06072e-06	0.000840529	3.25513	TMEM154	protein_coding	up
ENSG00000186716.20	0.147416	5.52078	4.52607	9.10642e-06	0.000840529	3.25369	BCR	protein_coding	up
ENSG00000180354.16	0.288056	4.92014	4.52377	9.19854e-06	0.000843136	3.2577	MTURN	protein_coding	up
ENSG00000198060.10	-0.16716	4.37822	-4.51822	9.42536e-06	0.000853007	3.25764	2025-03-05	protein_coding	down
ENSG00000118898.16	0.382533	1.81088	4.51797	9.43549e-06	0.000853007	3.10278	PPL	protein_coding	up
ENSG00000114770.17	0.238849	5.12605	4.50652	9.92036e-06	0.000890741	3.18517	ABCC5	protein_coding	up
ENSG00000117632.23	0.405836	1.23789	4.50301	1.00736e-05	0.000898387	2.83993	STMN1	protein_coding	up
ENSG00000135316.17	-0.115751	6.86197	-4.50142	1.01438e-05	0.000898579	3.1455	SYNCRIP	protein_coding	down
ENSG00000114166.8	0.212422	5.96532	4.49604	1.03849e-05	0.000908541	3.12291	KAT2B	protein_coding	up
ENSG00000169814.13	0.14917	3.51784	4.49497	1.04337e-05	0.000908541	3.17113	BTD	protein_coding	up
ENSG00000129084.17	-0.118808	6.06904	-4.49433	1.04628e-05	0.000908541	3.12828	PSMA1	protein_coding	down
ENSG00000143622.11	-0.158751	6.26933	-4.48903	1.07073e-05	0.000914091	3.10406	RIT1	protein_coding	down
ENSG00000104064.17	-0.143013	4.1298	-4.48852	1.07315e-05	0.000914091	3.14319	GABPB1	protein_coding	down
ENSG00000231074.8	0.241708	4.54518	4.48845	1.07345e-05	0.000914091	3.12746	HCG18	antisense	up
ENSG00000198089.15	0.163664	4.58048	4.48456	1.0918e-05	0.000919697	3.10964	SFI1	protein_coding	up
ENSG00000027075.15	0.342581	3.82666	4.48163	1.10581e-05	0.000919697	3.11656	PRKCH	protein_coding	up
ENSG00000116711.10	-0.264505	3.06869	-4.48062	1.11071e-05	0.000919697	3.08996	PLA2G4A	protein_coding	down
ENSG00000160593.18	0.165229	8.79389	4.48005	1.11346e-05	0.000919697	3.07191	JAML	protein_coding	up
ENSG00000160305.18	0.151736	5.73764	4.4784	1.12147e-05	0.000919697	3.05613	DIP2A	protein_coding	up
ENSG00000172992.12	0.199266	2.83305	4.47833	1.12184e-05	0.000919697	3.08073	DCAKD	protein_coding	up
ENSG00000100578.15	0.169493	4.31713	4.47267	1.14975e-05	0.000936766	3.07191	KIAA0586	protein_coding	up
ENSG00000155508.13	-0.146164	6.92089	-4.47025	1.16193e-05	0.000938165	3.01985	CNOT8	protein_coding	down
ENSG00000165609.13	0.171169	4.40395	4.4686	1.17027e-05	0.000938165	3.05199	NUDT5	protein_coding	up
ENSG00000099804.9	0.277411	4.89042	4.4681	1.17284e-05	0.000938165	3.03374	CDC34	protein_coding	up
ENSG00000189403.15	-0.175455	7.75508	-4.46661	1.18043e-05	0.000938165	3.01069	HMGB1	protein_coding	down
ENSG00000102871.16	0.160927	3.88262	4.46409	1.19343e-05	0.000938165	3.04837	TRADD	protein_coding	up
ENSG00000173744.17	-0.197121	7.35516	-4.46396	1.19412e-05	0.000938165	2.99268	AGFG1	protein_coding	down
ENSG00000247774.6	0.482814	1.29651	4.46008	1.21436e-05	0.000948426	2.77292	PCED1B-AS1	processed_transcript	up
ENSG00000150540.14	-0.243422	5.07751	-4.45769	1.22701e-05	0.000950283	3.0158	HNMT	protein_coding	down
ENSG00000088179.9	0.25678	4.29288	4.45692	1.23114e-05	0.000950283	3.00946	PTPN4	protein_coding	up
ENSG00000146729.10	-0.127561	5.84913	-4.44882	1.27509e-05	0.00097296	2.94754	NIPSNAP2	protein_coding	down
ENSG00000161960.15	-0.143445	8.90876	-4.44879	1.27526e-05	0.00097296	2.94789	EIF4A1	protein_coding	down
ENSG00000151702.17	0.124639	7.75767	4.44183	1.31423e-05	0.000995661	2.90553	FLI1	protein_coding	up
ENSG00000001461.17	0.225905	3.72342	4.4408	1.32011e-05	0.000995661	2.95641	NIPAL3	protein_coding	up
ENSG00000141084.11	0.241636	4.60292	4.43054	1.37992e-05	0.00103336	2.8953	RANBP10	protein_coding	up
ENSG00000164506.14	0.218108	5.49928	4.42956	1.38575e-05	0.00103336	2.86432	STXBP5	protein_coding	up
ENSG00000122026.10	-0.181774	8.41909	-4.42392	1.41984e-05	0.00104327	2.84524	RPL21	protein_coding	down
ENSG00000128594.8	0.306764	4.35836	4.42321	1.42419e-05	0.00104327	2.87242	LRRC4	protein_coding	up
ENSG00000137876.10	-0.203271	5.80628	-4.42296	1.42577e-05	0.00104327	2.8659	RSL24D1	protein_coding	down
ENSG00000227507.2	0.426295	1.96756	4.42158	1.43424e-05	0.00104327	2.79031	LTB	protein_coding	up
ENSG00000198589.12	0.168922	5.73673	4.42089	1.43856e-05	0.00104327	2.82435	LRBA	protein_coding	up
ENSG00000198858.10	0.303815	6.63563	4.41931	1.44832e-05	0.00104461	2.8149	R3HDM4	protein_coding	up
ENSG00000151576.10	-0.159584	5.09481	-4.41744	1.46003e-05	0.00104733	2.83713	QTRT2	protein_coding	down
ENSG00000104408.9	-0.198212	7.983	-4.41048	1.50443e-05	0.00107335	2.79087	EIF3E	protein_coding	down
ENSG00000162722.9	0.732123	3.34304	4.40822	1.51911e-05	0.001078	2.827	TRIM58	protein_coding	up
ENSG00000171853.16	0.172765	5.40302	4.40541	1.53759e-05	0.00108528	2.77328	TRAPPC12	protein_coding	up
ENSG00000171863.14	-0.206082	7.82263	-4.39764	1.58973e-05	0.00111611	2.74513	RPS7	protein_coding	down
ENSG00000149311.18	0.157999	8.01181	4.39596	1.60121e-05	0.00111822	2.72511	ATM	protein_coding	up
ENSG00000143207.21	0.103936	6.1882	4.39471	1.60983e-05	0.00111832	2.71706	COP1	protein_coding	up
ENSG00000115128.7	-0.164753	4.52936	-4.39165	1.63105e-05	0.00112713	2.75713	SF3B6	protein_coding	down
ENSG00000169057.22	0.11105	6.11794	4.3877	1.6589e-05	0.00114041	2.68652	MECP2	protein_coding	up
ENSG00000116353.15	0.244923	0.895566	4.38476	1.67992e-05	0.00114419	2.31421	MECR	protein_coding	up
ENSG00000138081.20	-0.137088	6.71422	-4.38404	1.68513e-05	0.00114419	2.67204	FBXO11	protein_coding	down
ENSG00000116459.11	-0.120156	6.24565	-4.3833	1.69042e-05	0.00114419	2.68918	ATP5PB	protein_coding	down
ENSG00000173638.19	0.194671	5.50862	4.38121	1.7056e-05	0.00114858	2.6721	SLC19A1	protein_coding	up
ENSG00000154767.14	0.168664	5.01778	4.37297	1.76673e-05	0.00117208	2.6559	XPC	protein_coding	up
ENSG00000103249.18	-0.192388	6.59559	-4.3727	1.76883e-05	0.00117208	2.63311	CLCN7	protein_coding	down
ENSG00000063854.13	0.27798	3.89269	4.36972	1.79143e-05	0.00117208	2.67481	HAGH	protein_coding	up
ENSG00000126860.11	-0.241058	7.5625	-4.3681	1.80385e-05	0.00117208	2.62781	EVI2A	protein_coding	down
ENSG00000184863.11	0.0888632	7.30534	4.36776	1.80649e-05	0.00117208	2.60502	RBM33	protein_coding	up
ENSG00000100225.18	0.255391	6.88273	4.36775	1.80662e-05	0.00117208	2.60445	FBXO7	protein_coding	up
ENSG00000107438.9	0.588708	1.50435	4.36765	1.80738e-05	0.00117208	2.47702	PDLIM1	protein_coding	up
ENSG00000203896.10	0.394603	1.66174	4.36634	1.81747e-05	0.00117208	2.51568	LIME1	protein_coding	up
ENSG00000102898.12	0.184319	4.54481	4.36596	1.82042e-05	0.00117208	2.64333	NUTF2	protein_coding	up
ENSG00000148660.20	0.147967	5.55569	4.36218	1.84999e-05	0.00117494	2.59355	CAMK2G	protein_coding	up
ENSG00000158987.20	0.187854	5.37849	4.36208	1.85082e-05	0.00117494	2.6004	RAPGEF6	protein_coding	up
ENSG00000103342.13	0.256955	6.43668	4.36167	1.85406e-05	0.00117494	2.58207	GSPT1	protein_coding	up
ENSG00000081154.11	-0.127236	6.28039	-4.36086	1.86046e-05	0.00117494	2.59244	PCNP	protein_coding	down
ENSG00000125744.12	0.328481	1.20979	4.35483	1.90889e-05	0.00119937	2.32153	RTN2	protein_coding	up
ENSG00000066926.11	0.365495	4.44638	4.35379	1.91732e-05	0.00119937	2.59462	FECH	protein_coding	up
ENSG00000173757.9	0.155417	7.41174	4.35212	1.93095e-05	0.0012013	2.54428	STAT5B	protein_coding	up
ENSG00000168264.10	-0.193321	8.47703	-4.35061	1.94342e-05	0.0012013	2.55228	IRF2BP2	protein_coding	down
ENSG00000012660.14	0.125901	7.27183	4.35009	1.94771e-05	0.0012013	2.53505	ELOVL5	protein_coding	up
ENSG00000137752.24	-0.136576	7.75383	-4.34862	1.95994e-05	0.00120232	2.5416	CASP1	protein_coding	down
ENSG00000104824.17	-0.0918974	7.73974	-4.34771	1.96758e-05	0.00120232	2.53087	HNRNPL	protein_coding	down
ENSG00000077684.16	0.178908	5.10785	4.34493	1.99091e-05	0.00120956	2.53902	JADE1	protein_coding	up
ENSG00000078687.17	0.294724	3.6679	4.34383	2.00026e-05	0.00120956	2.57966	TNRC6C	protein_coding	up
ENSG00000071553.17	-0.121059	6.97773	-4.34305	2.00692e-05	0.00120956	2.5101	ATP6AP1	protein_coding	down
ENSG00000144224.17	-0.129974	6.67044	-4.33966	2.036e-05	0.00121956	2.49838	UBXN4	protein_coding	down
ENSG00000172954.13	0.258002	2.9296	4.33897	2.042e-05	0.00121956	2.55292	LCLAT1	protein_coding	up
ENSG00000116260.17	-0.184799	6.83373	-4.33738	2.05577e-05	0.00122226	2.49304	QSOX1	protein_coding	down
ENSG00000122729.19	0.198073	4.16361	4.33591	2.06863e-05	0.00122439	2.536	ACO1	protein_coding	up
ENSG00000100030.14	0.104909	8.42997	4.33485	2.07795e-05	0.00122441	2.48712	MAPK1	protein_coding	up
ENSG00000152270.9	0.208569	5.73153	4.33361	2.08896e-05	0.00122543	2.47846	PDE3B	protein_coding	up
ENSG00000163464.7	0.861305	2.30485	4.32665	2.15148e-05	0.00125652	2.43007	CXCR1	protein_coding	up
ENSG00000068354.16	0.147766	3.83857	4.32141	2.1997e-05	0.00127028	2.49059	TBC1D25	protein_coding	up
ENSG00000101474.12	0.213007	5.43164	4.32083	2.20517e-05	0.00127028	2.43531	APMAP	protein_coding	up
ENSG00000136908.17	0.282466	3.90668	4.31935	2.21899e-05	0.00127028	2.48078	DPM2	protein_coding	up
ENSG00000183049.12	0.240118	5.97328	4.31882	2.224e-05	0.00127028	2.41677	CAMK1D	protein_coding	up
ENSG00000106615.10	-0.134398	4.76659	-4.31854	2.22659e-05	0.00127028	2.46283	RHEB	protein_coding	down
ENSG00000177981.11	0.12848	4.82078	4.31744	2.23704e-05	0.00127028	2.44115	ASB8	protein_coding	up
ENSG00000148672.9	-0.0959333	7.26616	-4.31687	2.2424e-05	0.00127028	2.41826	GLUD1	protein_coding	down
ENSG00000076770.14	0.242758	6.79844	4.31166	2.29229e-05	0.00129299	2.383	MBNL3	protein_coding	up
ENSG00000282978.1	0.533206	-1.42445	4.30773	2.33064e-05	0.00130903	0.898289	AC110994.2	processed_pseudogene	up
ENSG00000169251.12	-0.148741	5.16116	-4.30653	2.34246e-05	0.00131009	2.40967	NMD3	protein_coding	down
ENSG00000144749.13	0.311222	2.46407	4.30214	2.38631e-05	0.00132898	2.38681	LRIG1	protein_coding	up
ENSG00000180263.14	-0.261001	5.47281	-4.301	2.39775e-05	0.00132974	2.37514	FGD6	protein_coding	down
ENSG00000166965.12	0.346969	2.27915	4.29912	2.41682e-05	0.00133471	2.35915	RCCD1	protein_coding	up
ENSG00000156508.18	-0.146576	12.9287	-4.29298	2.48015e-05	0.00136398	2.37889	EEF1A1	protein_coding	down
ENSG00000091527.15	-0.110554	8.43337	-4.28926	2.51927e-05	0.0013795	2.31207	CDV3	protein_coding	down
ENSG00000173660.12	-0.145634	4.93988	-4.28705	2.54289e-05	0.0013795	2.34899	UQCRH	protein_coding	down
ENSG00000172349.17	0.160522	7.42984	4.28657	2.54798e-05	0.0013795	2.28842	IL16	protein_coding	up
ENSG00000132963.8	-0.158696	4.48094	-4.28637	2.55017e-05	0.0013795	2.34801	POMP	protein_coding	down
ENSG00000082153.18	-0.120956	7.57695	-4.27988	2.62066e-05	0.00141184	2.26958	BZW1	protein_coding	down
ENSG00000100439.10	0.18094	4.36339	4.2785	2.63586e-05	0.00141426	2.30986	ABHD4	protein_coding	up
ENSG00000135387.21	-0.0962406	7.69332	-4.27313	2.69591e-05	0.00144062	2.24024	CAPRIN1	protein_coding	down
ENSG00000177485.7	-0.177914	5.93401	-4.26902	2.74277e-05	0.00145176	2.23933	ZBTB33	protein_coding	down
ENSG00000105701.16	0.347872	7.25094	4.26796	2.75499e-05	0.00145176	2.21832	FKBP8	protein_coding	up
ENSG00000238227.8	0.159719	4.97043	4.26756	2.75957e-05	0.00145176	2.25209	TMEM250	protein_coding	up
ENSG00000198853.12	-0.256203	5.08594	-4.26741	2.76138e-05	0.00145176	2.25747	RUSC2	protein_coding	down
ENSG00000196776.16	0.147273	6.99086	4.26592	2.7786e-05	0.00145176	2.20462	CD47	protein_coding	up
ENSG00000141376.22	0.153563	4.72791	4.26557	2.78274e-05	0.00145176	2.24284	BCAS3	protein_coding	up
ENSG00000173535.14	0.524957	4.50299	4.26274	2.81595e-05	0.00146268	2.24947	TNFRSF10C	protein_coding	up
ENSG00000132205.11	-0.18255	8.18158	-4.26105	2.83594e-05	0.00146268	2.20395	EMILIN2	protein_coding	down
ENSG00000179091.5	-0.148186	5.54687	-4.26096	2.83693e-05	0.00146268	2.21706	CYC1	protein_coding	down
ENSG00000142405.21	0.172872	6.66048	4.25946	2.85479e-05	0.00146616	2.18578	NLRP12	protein_coding	up
ENSG00000156256.15	-0.114915	5.2968	-4.25751	2.87815e-05	0.00147243	2.20968	USP16	protein_coding	down
ENSG00000029639.11	0.223286	1.76517	4.25485	2.91044e-05	0.0014832	2.10517	TFB1M	protein_coding	up
ENSG00000024048.10	0.129159	7.18514	4.24729	3.00375e-05	0.00152486	2.13459	UBR2	protein_coding	up
ENSG00000106344.8	0.112177	4.81524	4.24185	3.07268e-05	0.00155388	2.15126	RBM28	protein_coding	up
ENSG00000133112.16	-0.195105	10.5829	-4.23231	3.19734e-05	0.00161075	2.12144	TPT1	protein_coding	down
ENSG00000164808.16	-0.207058	6.68355	-4.22737	3.26378e-05	0.00163797	2.06611	SPIDR	protein_coding	down
ENSG00000123739.11	0.30599	2.77737	4.2235	3.31671e-05	0.00164883	2.11505	PLA2G12A	protein_coding	up
ENSG00000197061.4	0.322266	2.52287	4.2234	3.31804e-05	0.00164883	2.09997	HIST1H4C	protein_coding	up
ENSG00000196504.16	-0.0907489	7.03429	-4.22305	3.32289e-05	0.00164883	2.04712	PRPF40A	protein_coding	down
ENSG00000196747.4	0.398947	1.11558	4.22181	3.3401e-05	0.00165116	1.89613	HIST1H2AI	protein_coding	up
ENSG00000000419.12	-0.154017	3.43542	-4.22061	3.3568e-05	0.00165322	2.11458	DPM1	protein_coding	down
ENSG00000136280.16	0.141854	5.63555	4.21881	3.38193e-05	0.00165941	2.03809	CCM2	protein_coding	up
ENSG00000196914.9	0.32396	4.2623	4.2167	3.41173e-05	0.00166177	2.07276	ARHGEF12	protein_coding	up
ENSG00000137055.15	-0.116549	5.29584	-4.21668	3.41193e-05	0.00166177	2.04712	PLAA	protein_coding	down
ENSG00000103642.12	-0.19267	5.62062	-4.2142	3.44722e-05	0.00167279	2.04202	LACTB	protein_coding	down
ENSG00000138061.12	-0.434168	7.89361	-4.20422	3.59284e-05	0.00173706	1.98756	CYP1B1	protein_coding	down
ENSG00000127824.14	0.208433	5.37069	4.20098	3.64145e-05	0.00175414	1.97329	TUBA4A	protein_coding	up
ENSG00000145901.15	0.150714	6.69147	4.19684	3.70424e-05	0.0017779	1.93865	TNIP1	protein_coding	up
ENSG00000213281.5	-0.128477	6.42997	-4.19369	3.75278e-05	0.00179467	1.94334	NRAS	protein_coding	down
ENSG00000102804.15	0.250306	4.98792	4.19155	3.78627e-05	0.00179522	1.94773	TSC22D1	protein_coding	up
ENSG00000100368.14	0.191878	7.68715	4.19142	3.78828e-05	0.00179522	1.92395	CSF2RB	protein_coding	up
ENSG00000123349.14	-0.194916	6.90322	-4.18995	3.81129e-05	0.00179522	1.94352	PFDN5	protein_coding	down
ENSG00000206418.4	-0.180482	4.63494	-4.18928	3.82191e-05	0.00179522	1.97238	RAB12	protein_coding	down
ENSG00000072864.15	0.143101	5.93575	4.18927	3.82194e-05	0.00179522	1.9149	NDE1	protein_coding	up
ENSG00000147649.10	-0.113287	7.602	-4.18582	3.87686e-05	0.00181457	1.91072	MTDH	protein_coding	down
ENSG00000175115.12	0.142485	6.81968	4.18247	3.93082e-05	0.00183332	1.88914	PACS1	protein_coding	up
ENSG00000271503.6	0.840889	3.32197	4.17862	3.99371e-05	0.00185609	1.95893	CCL5	protein_coding	up
ENSG00000083812.12	0.151777	3.97087	4.16576	4.21077e-05	0.00194453	1.8933	ZNF324	protein_coding	up
ENSG00000168438.15	-0.118316	5.98495	-4.16561	4.21347e-05	0.00194453	1.84292	CDC40	protein_coding	down
ENSG00000156411.9	-0.137883	5.01402	-4.1628	4.26237e-05	0.00195944	1.86736	ATP5MPL	protein_coding	down
ENSG00000118181.11	-0.148856	8.60746	-4.16205	4.27547e-05	0.00195944	1.82474	RPS25	protein_coding	down
ENSG00000137817.17	-0.112701	5.55636	-4.1609	4.29571e-05	0.0019619	1.82408	PARP6	protein_coding	down
ENSG00000205302.7	-0.122899	6.62846	-4.15619	4.37959e-05	0.00198493	1.80384	SNX2	protein_coding	down
ENSG00000135749.19	0.249768	3.83574	4.15602	4.38272e-05	0.00198493	1.86187	PCNX2	protein_coding	up
ENSG00000136830.12	-0.262563	6.43342	-4.15554	4.39136e-05	0.00198493	1.80314	FAM129B	protein_coding	down
ENSG00000169891.18	0.263522	4.75381	4.15471	4.40627e-05	0.00198493	1.8171	REPS2	protein_coding	up
ENSG00000130066.16	-0.208525	9.06196	-4.15292	4.43881e-05	0.00199278	1.79672	SAT1	protein_coding	down
ENSG00000165071.14	0.198033	6.43882	4.14949	4.50164e-05	0.00199767	1.76186	TMEM71	protein_coding	up
ENSG00000197006.14	-0.146789	7.94933	-4.14904	4.51e-05	0.00199767	1.77082	METTL9	protein_coding	down
ENSG00000107679.14	0.227829	3.62351	4.14896	4.5114e-05	0.00199767	1.84303	PLEKHA1	protein_coding	up
ENSG00000170142.11	-0.122821	5.69407	-4.14834	4.523e-05	0.00199767	1.78808	UBE2E1	protein_coding	down
ENSG00000279369.1	0.174663	3.36191	4.14821	4.52538e-05	0.00199767	1.84611	AC046185.3	TEC	up
ENSG00000119535.17	0.167955	9.77395	4.1398	4.68395e-05	0.00206078	1.75905	CSF3R	protein_coding	up
ENSG00000117394.21	0.453762	2.0464	4.13897	4.6998e-05	0.00206088	1.75895	SLC2A1	protein_coding	up
ENSG00000004700.16	-0.123972	5.04863	-4.1363	4.75144e-05	0.00207425	1.75924	RECQL	protein_coding	down
ENSG00000170271.11	0.485016	2.98955	4.13505	4.77568e-05	0.00207425	1.79762	FAXDC2	protein_coding	up
ENSG00000196576.15	-0.221901	8.77494	-4.13497	4.77741e-05	0.00207425	1.728	PLXNB2	protein_coding	down
ENSG00000108829.10	-0.142683	6.51201	-4.13018	4.87179e-05	0.00210829	1.69966	LRRC59	protein_coding	down
ENSG00000100351.16	0.872433	2.32325	4.12759	4.92364e-05	0.00212376	1.74962	GRAP2	protein_coding	up
ENSG00000171840.11	0.268612	3.22076	4.12478	4.98041e-05	0.00213746	1.76093	NINJ2	protein_coding	up
ENSG00000135124.14	-0.193103	5.51389	-4.12441	4.98777e-05	0.00213746	1.69345	P2RX4	protein_coding	down
ENSG00000060138.13	0.282528	7.43877	4.12118	5.05397e-05	0.00215881	1.65508	YBX3	protein_coding	up
ENSG00000105967.16	-0.196326	6.90721	-4.1165	5.15121e-05	0.00219291	1.65779	TFEC	protein_coding	down
ENSG00000076003.5	0.243258	2.2245	4.11467	5.18979e-05	0.00219291	1.68302	MCM6	protein_coding	up
ENSG00000177272.9	0.34841	3.64711	4.11438	5.19602e-05	0.00219291	1.71344	KCNA3	protein_coding	up
ENSG00000189180.15	0.148413	5.57253	4.11418	5.20025e-05	0.00219291	1.64286	ZNF33A	protein_coding	up
ENSG00000174748.20	-0.125781	9.61774	-4.11143	5.25869e-05	0.00221049	1.64984	RPL15	protein_coding	down
ENSG00000182774.12	-0.166288	7.96808	-4.11048	5.27903e-05	0.00221096	1.63998	RPS17	protein_coding	down
ENSG00000184216.14	-0.148834	6.40945	-4.10982	5.29331e-05	0.00221096	1.62293	IRAK1	protein_coding	down
ENSG00000105287.12	0.157664	5.12523	4.10764	5.34041e-05	0.0022236	1.6352	PRKD2	protein_coding	up
ENSG00000101182.15	-0.10887	5.56492	-4.10624	5.37101e-05	0.00222931	1.63711	PSMA7	protein_coding	down
ENSG00000157978.11	0.255493	4.03144	4.10523	5.39297e-05	0.0022314	1.66689	LDLRAP1	protein_coding	up
ENSG00000111859.17	0.172653	6.44324	4.10222	5.45942e-05	0.00225161	1.57966	NEDD9	protein_coding	up
ENSG00000133816.15	0.226677	7.3643	4.10147	5.47593e-05	0.00225161	1.58122	MICAL2	protein_coding	up
ENSG00000101236.17	0.15668	6.81491	4.0993	5.52457e-05	0.00225837	1.57496	RNF24	protein_coding	up
ENSG00000104164.10	-0.114805	6.36246	-4.09921	5.52659e-05	0.00225837	1.5884	BLOC1S6	protein_coding	down
ENSG00000141504.11	-0.202571	4.20577	-4.09592	5.60078e-05	0.00227899	1.64368	SAT2	protein_coding	down
ENSG00000114942.14	-0.160897	6.55331	-4.09502	5.62121e-05	0.00227899	1.58865	EEF1B2	protein_coding	down
ENSG00000176171.11	0.2429	2.92145	4.09469	5.62885e-05	0.00227899	1.65101	BNIP3	protein_coding	up
ENSG00000186660.15	-0.139955	7.12949	-4.09193	5.69222e-05	0.0022976	1.54961	ZFP91	protein_coding	down
ENSG00000082397.17	-0.258284	6.59788	-4.0899	5.73928e-05	0.00230954	1.5595	EPB41L3	protein_coding	down
ENSG00000072858.10	0.39866	1.81029	4.08875	5.76603e-05	0.00231325	1.54913	SIDT1	protein_coding	up
ENSG00000169180.11	0.188148	7.48686	4.08449	5.86633e-05	0.00234636	1.51825	XPO6	protein_coding	up
ENSG00000278828.1	0.352906	3.86301	4.08322	5.89653e-05	0.00235131	1.59472	HIST1H3H	protein_coding	up
ENSG00000007392.16	-0.135554	5.46669	-4.0797	5.98116e-05	0.00237787	1.52057	LUC7L	protein_coding	down
ENSG00000055211.14	-0.133338	4.75939	-4.07322	6.13982e-05	0.00243362	1.53405	GINM1	protein_coding	down
ENSG00000179523.4	0.167888	2.21424	4.07116	6.19117e-05	0.00244035	1.52969	EIF3J-DT	lincRNA	up
ENSG00000154889.16	0.152793	5.33688	4.07098	6.1956e-05	0.00244035	1.4875	MPPE1	protein_coding	up
ENSG00000111266.8	0.258303	2.73001	4.06994	6.2218e-05	0.00244035	1.557	DUSP16	protein_coding	up
ENSG00000124120.11	0.177018	4.02266	4.06801	6.27044e-05	0.00244035	1.52946	TTPAL	protein_coding	up
ENSG00000255026.1	0.579307	-0.451232	4.0679	6.27317e-05	0.00244035	0.790307	AC136475.3	antisense	up
ENSG00000174007.8	0.294625	1.79756	4.06742	6.28528e-05	0.00244035	1.46677	CEP19	protein_coding	up
ENSG00000118900.14	0.136253	6.40811	4.06739	6.28621e-05	0.00244035	1.44957	UBN1	protein_coding	up
ENSG00000259319.1	-0.298045	2.65748	-4.06645	6.30994e-05	0.00244237	1.53106	AF111167.2	antisense	down
ENSG00000141959.17	-0.12866	6.81714	-4.06496	6.34805e-05	0.00244994	1.45254	PFKL	protein_coding	down
ENSG00000088992.18	0.237138	4.21382	4.06413	6.36923e-05	0.00244996	1.50976	TESC	protein_coding	up
ENSG00000141580.16	-0.11909	6.18213	-4.06351	6.38524e-05	0.00244996	1.45097	WDR45B	protein_coding	down
ENSG00000238057.9	-0.244302	5.82286	-4.06192	6.42638e-05	0.0024586	1.46019	ZEB2-AS1	antisense	down
ENSG00000120942.13	0.158701	3.42582	4.06046	6.4643e-05	0.00246596	1.52457	UBIAD1	protein_coding	up
ENSG00000145337.5	-0.127803	5.38732	-4.05965	6.48553e-05	0.00246693	1.46566	PYURF	protein_coding	down
ENSG00000236088.9	0.241988	1.71315	4.05788	6.53181e-05	0.00247739	1.41094	COX10-AS1	processed_transcript	up
ENSG00000100142.15	0.173091	3.03158	4.05664	6.56456e-05	0.00248268	1.51512	POLR2F	protein_coding	up
ENSG00000181274.6	0.214918	6.23476	4.05302	6.66084e-05	0.00249871	1.40268	FRAT2	protein_coding	up
ENSG00000197170.10	-0.136967	4.94377	-4.05229	6.68043e-05	0.00249871	1.44184	PSMD12	protein_coding	down
ENSG00000142676.14	-0.119722	7.63085	-4.05226	6.68135e-05	0.00249871	1.43412	RPL11	protein_coding	down
ENSG00000130821.16	0.45541	2.53759	4.05221	6.68265e-05	0.00249871	1.48603	SLC6A8	protein_coding	up
ENSG00000284691.1	0.376849	0.905147	4.05077	6.72131e-05	0.00250122	1.21697	AC073111.5	protein_coding	up
ENSG00000008086.11	0.177044	4.18066	4.05055	6.72727e-05	0.00250122	1.46045	CDKL5	protein_coding	up
ENSG00000197324.9	0.21571	7.25265	4.04866	6.7787e-05	0.00251326	1.38865	LRP10	protein_coding	up
ENSG00000069966.18	0.285266	2.39939	4.04327	6.92725e-05	0.00254947	1.45122	GNB5	protein_coding	up
ENSG00000083642.19	-0.119904	6.31792	-4.04311	6.93165e-05	0.00254947	1.36955	PDS5B	protein_coding	down
ENSG00000116560.11	-0.108639	8.06964	-4.04272	6.94252e-05	0.00254947	1.36946	SFPQ	protein_coding	down
ENSG00000233559.1	0.311096	1.38765	4.04232	6.95364e-05	0.00254947	1.31839	LINC00513	lincRNA	up
ENSG00000101224.17	0.320247	3.93135	4.03974	7.02595e-05	0.00256885	1.43259	CDC25B	protein_coding	up
ENSG00000062282.15	0.255713	4.87213	4.03888	7.05041e-05	0.00257067	1.38442	DGAT2	protein_coding	up
ENSG00000178127.13	-0.12695	4.85987	-4.0367	7.11211e-05	0.00258603	1.39778	NDUFV2	protein_coding	down
ENSG00000244625.6	0.23332	1.7171	4.03451	7.17488e-05	0.00260168	1.33935	MIATNB	lincRNA	up
ENSG00000167995.16	-0.310878	8.05228	-4.03273	7.22642e-05	0.00261319	1.32946	BEST1	protein_coding	down
ENSG00000103091.15	0.103401	4.42195	4.03002	7.30531e-05	0.0026345	1.37545	WDR59	protein_coding	up
ENSG00000222011.9	0.209066	1.87818	4.02614	7.41971e-05	0.0026636	1.33715	FAM185A	protein_coding	up
ENSG00000133773.12	-0.130122	4.57231	-4.02591	7.42636e-05	0.0026636	1.37494	CCDC59	protein_coding	down
ENSG00000089094.19	-0.142654	6.11128	-4.02123	7.5669e-05	0.00270205	1.29017	KDM2B	protein_coding	down
ENSG00000172183.15	0.421547	3.47055	4.02098	7.57449e-05	0.00270205	1.38088	ISG20	protein_coding	up
ENSG00000269743.3	0.279973	1.01054	4.01995	7.60562e-05	0.00270584	1.14454	SLC25A53	protein_coding	up
ENSG00000082512.15	0.318545	2.53023	4.01892	7.63693e-05	0.00270967	1.37022	TRAF5	protein_coding	up
ENSG00000187699.10	0.64375	2.5644	4.0179	7.66814e-05	0.00271345	1.36983	C2orf88	protein_coding	up
ENSG00000146463.11	-0.0965182	6.04678	-4.01546	7.74321e-05	0.00273181	1.28058	ZMYM4	protein_coding	down
ENSG00000228655.7	0.411957	0.980398	4.01445	7.77467e-05	0.00273181	1.14243	AC079793.1	antisense	up
ENSG00000125818.18	0.192368	6.28329	4.01368	7.79866e-05	0.00273181	1.25506	PSMF1	protein_coding	up
ENSG00000181915.4	-0.1822	4.89082	-4.01354	7.80282e-05	0.00273181	1.30379	ADO	protein_coding	down
ENSG00000213066.13	0.237055	2.9821	4.01217	7.84563e-05	0.00273954	1.35658	FGFR1OP	protein_coding	up
ENSG00000136040.9	0.141611	8.68192	4.00948	7.93044e-05	0.00275629	1.25664	PLXNC1	protein_coding	up
ENSG00000214530.9	0.241202	2.22653	4.00932	7.93538e-05	0.00275629	1.32	STARD10	protein_coding	up
ENSG00000197892.13	-0.143091	6.00088	-4.00728	8.00032e-05	0.00277155	1.24761	KIF13B	protein_coding	down
ENSG00000138735.16	0.54202	2.89382	4.00661	8.02156e-05	0.00277164	1.3368	PDE5A	protein_coding	up
ENSG00000114062.19	-0.115983	6.57813	-4.00589	8.04492e-05	0.00277245	1.23219	UBE3A	protein_coding	down
ENSG00000065491.8	0.196575	3.30301	4.00438	8.09339e-05	0.00278189	1.32528	TBC1D22B	protein_coding	up
ENSG00000122359.18	0.156001	7.07826	4.00206	8.1684e-05	0.00279357	1.21165	ANXA11	protein_coding	up
ENSG00000198873.11	0.154	3.76279	4.00202	8.16968e-05	0.00279357	1.30157	GRK5	protein_coding	up
ENSG00000181788.4	0.20858	5.62084	3.99843	8.2873e-05	0.00282646	1.20575	SIAH2	protein_coding	up
ENSG00000059728.11	0.282825	7.8439	3.99717	8.32924e-05	0.00283345	1.19967	MXD1	protein_coding	up
ENSG00000179335.18	0.11262	6.5881	3.99554	8.38326e-05	0.00284449	1.18456	CLK3	protein_coding	up
ENSG00000066427.22	-0.131997	5.7266	-3.99328	8.45909e-05	0.00286286	1.19891	ATXN3	protein_coding	down
ENSG00000143862.8	-0.12119	5.73984	-3.98816	8.63282e-05	0.00291372	1.17931	ARL8A	protein_coding	down
ENSG00000137216.19	0.247033	4.0881	3.98756	8.65351e-05	0.00291372	1.23766	TMEM63B	protein_coding	up
ENSG00000147454.14	0.315578	7.31695	3.98674	8.68168e-05	0.00291576	1.16014	SLC25A37	protein_coding	up
ENSG00000161911.11	0.806296	0.55638	3.9854	8.72803e-05	0.00292365	0.939605	TREML1	protein_coding	up
ENSG00000172057.10	0.20628	3.85164	3.98478	8.74946e-05	0.00292365	1.23442	ORMDL3	protein_coding	up
ENSG00000111142.14	-0.137781	5.17782	-3.98355	8.79254e-05	0.0029246	1.19542	METAP2	protein_coding	down
ENSG00000133193.12	0.184102	5.43978	3.98343	8.79664e-05	0.0029246	1.15733	FAM104A	protein_coding	up
ENSG00000126903.16	0.132002	3.69057	3.98252	8.82843e-05	0.0029278	1.23569	SLC10A3	protein_coding	up
ENSG00000162664.17	-0.12674	5.05011	-3.98061	8.89554e-05	0.00294266	1.17797	ZNF326	protein_coding	down
ENSG00000206053.13	0.163348	3.61252	3.97879	8.9601e-05	0.00294513	1.2274	JPT2	protein_coding	up
ENSG00000230590.10	0.146549	5.98986	3.97858	8.96747e-05	0.00294513	1.13235	FTX	lincRNA	up
ENSG00000170906.15	0.236675	3.11803	3.97851	8.96993e-05	0.00294513	1.23699	NDUFA3	protein_coding	up
ENSG00000102218.6	-0.134592	6.53107	-3.97635	9.04733e-05	0.00296116	1.1271	RP2	protein_coding	down
ENSG00000120685.20	-0.145925	5.73053	-3.97589	9.06364e-05	0.00296116	1.13344	PROSER1	protein_coding	down
ENSG00000067560.11	-0.141657	9.59746	-3.97429	9.12116e-05	0.002971	1.14251	RHOA	protein_coding	down
ENSG00000138640.15	0.176634	5.27129	3.97339	9.154e-05	0.002971	1.13374	FAM13A	protein_coding	up
ENSG00000278311.5	-0.101137	6.31685	-3.97319	9.16128e-05	0.002971	1.11102	GGNBP2	protein_coding	down
ENSG00000143363.17	0.171643	3.78808	3.97216	9.19862e-05	0.0029758	1.19469	PRUNE1	protein_coding	up
ENSG00000260661.1	0.268089	1.24658	3.9676	9.3662e-05	0.0030226	1.02545	AC116903.2	antisense	up
ENSG00000100201.21	0.119588	9.64495	3.96517	9.4566e-05	0.00303716	1.11109	DDX17	protein_coding	up
ENSG00000144559.10	0.214705	2.57118	3.96515	9.45734e-05	0.00303716	1.18345	TAMM41	protein_coding	up
ENSG00000157350.13	0.116897	6.40764	3.96152	9.59427e-05	0.00306842	1.06092	ST3GAL2	protein_coding	up
ENSG00000147548.17	0.0832206	7.21184	3.96133	9.60116e-05	0.00306842	1.06105	NSD3	protein_coding	up
ENSG00000238795.1	0.269673	3.94295	3.96024	9.64273e-05	0.00307426	1.16205	SCARNA12	snoRNA	up
ENSG00000086232.13	0.160946	6.38136	3.95934	9.67705e-05	0.00307777	1.05302	EIF2AK1	protein_coding	up
ENSG00000121064.12	-0.184736	7.18171	-3.95747	9.74895e-05	0.00309318	1.06737	SCPEP1	protein_coding	down
ENSG00000074370.18	0.189174	5.87904	3.95645	9.78821e-05	0.00309819	1.05376	ATP2A3	protein_coding	up
ENSG00000205730.6	-0.188269	5.82433	-3.95506	9.84197e-05	0.00310775	1.06697	ITPRIPL2	protein_coding	down
ENSG00000264772.6	-0.249258	4.65826	-3.95224	9.95226e-05	0.00313508	1.09923	AC016876.2	processed_transcript	down
ENSG00000079974.17	0.145938	3.55484	3.95084	0.000100071	0.00314486	1.13028	RABL2B	protein_coding	up
ENSG00000166169.17	0.186655	4.30127	3.94993	0.000100432	0.0031487	1.08708	POLL	protein_coding	up
ENSG00000084234.17	-0.202016	9.98019	-3.9478	0.000101277	0.00316632	1.05463	APLP2	protein_coding	down
ENSG00000057935.13	0.206878	2.28973	3.94731	0.000101474	0.00316632	1.10544	MTA3	protein_coding	up
ENSG00000140367.11	-0.124007	4.97721	-3.94662	0.000101749	0.00316743	1.06051	UBE2Q2	protein_coding	down
ENSG00000264920.1	0.306907	0.541667	3.94426	0.0001027	0.00318951	0.740487	AC018521.5	processed_transcript	up
ENSG00000111261.14	0.417869	1.75303	3.94343	0.000103036	0.00319243	1.05141	MANSC1	protein_coding	up
ENSG00000203618.5	0.89474	1.24385	3.93975	0.00010454	0.00321535	0.986907	GP1BB	protein_coding	up
ENSG00000056097.16	-0.0785688	7.05124	-3.93971	0.000104556	0.00321535	0.987396	ZFR	protein_coding	down
ENSG00000066557.6	-0.154817	3.89494	-3.93932	0.00010472	0.00321535	1.08526	LRRC40	protein_coding	down
ENSG00000198574.6	0.600508	1.50252	3.93924	0.00010475	0.00321535	1.00629	SH2D1B	protein_coding	up
ENSG00000128524.5	-0.204442	5.92137	-3.93616	0.000106026	0.00323607	0.988084	ATP6V1F	protein_coding	down
ENSG00000135801.9	-0.0924819	4.5953	-3.93597	0.000106108	0.00323607	1.0317	TAF5L	protein_coding	down
ENSG00000135046.14	-0.215217	8.67152	-3.93555	0.000106283	0.00323607	0.997607	ANXA1	protein_coding	down
ENSG00000134086.7	-0.102387	6.47852	-3.93525	0.000106406	0.00323607	0.975167	VHL	protein_coding	down
ENSG00000147677.11	-0.105961	7.61587	-3.93266	0.000107497	0.00326173	0.968259	EIF3H	protein_coding	down
ENSG00000125779.22	0.110651	5.82372	3.93046	0.000108428	0.00327128	0.963913	PANK2	protein_coding	up
ENSG00000124181.14	0.420712	1.89361	3.9302	0.000108538	0.00327128	1.02096	PLCG1	protein_coding	up
ENSG00000126261.13	-0.088857	5.86075	-3.93017	0.000108555	0.00327128	0.977343	UBA2	protein_coding	down
ENSG00000149782.11	-0.19058	4.60216	-3.92644	0.000110155	0.00331052	1.00889	PLCB3	protein_coding	down
ENSG00000075884.14	0.206172	5.43629	3.92559	0.000110522	0.00331052	0.952427	ARHGAP15	protein_coding	up
ENSG00000166783.22	0.130253	7.35665	3.92539	0.00011061	0.00331052	0.932937	MARF1	protein_coding	up
ENSG00000244026.6	0.259048	1.18117	3.92268	0.000111791	0.00333269	0.849068	FAM86DP	transcribed_unprocessed_pseudogene	up
ENSG00000117020.17	0.218226	4.60977	3.92253	0.000111855	0.00333269	0.978502	AKT3	protein_coding	up
ENSG00000235863.3	0.145164	3.28131	3.92115	0.000112462	0.00334322	1.03272	B3GALT4	protein_coding	up
ENSG00000033800.13	0.0929516	7.71458	3.92045	0.000112773	0.00334494	0.917827	PIAS1	protein_coding	up
ENSG00000217555.12	0.164614	4.97603	3.91909	0.000113376	0.00335519	0.95704	CKLF	protein_coding	up
ENSG00000103479.16	0.116961	7.57697	3.91852	0.000113627	0.00335519	0.910774	RBL2	protein_coding	up
ENSG00000018189.13	-0.142015	5.81053	-3.91613	0.000114699	0.0033754	0.923562	RUFY3	protein_coding	down
ENSG00000225470.7	0.241425	3.60899	3.91546	0.000114998	0.0033754	1.00023	JPX	lincRNA	up
ENSG00000008130.15	0.135215	7.97785	3.91507	0.000115173	0.0033754	0.90363	NADK	protein_coding	up
ENSG00000123473.15	0.284809	2.94489	3.91429	0.000115527	0.0033754	1.01343	STIL	protein_coding	up
ENSG00000166579.15	0.180913	6.02965	3.91415	0.000115591	0.0033754	0.892078	NDEL1	protein_coding	up
ENSG00000125149.11	-0.14831	5.24276	-3.91305	0.000116089	0.00337919	0.929965	C16orf70	protein_coding	down
ENSG00000142546.13	0.188293	4.47812	3.91274	0.000116232	0.00337919	0.951625	NOSIP	protein_coding	up
ENSG00000174151.14	0.148659	4.01846	3.90978	0.000117583	0.00341095	0.961143	CYB561D1	protein_coding	up
ENSG00000074800.15	-0.126001	8.70484	-3.90753	0.000118626	0.00342566	0.890676	ENO1	protein_coding	down
ENSG00000169919.17	-0.178886	5.68165	-3.90722	0.000118769	0.00342566	0.896349	GUSB	protein_coding	down
ENSG00000175387.16	0.083253	7.42396	3.907	0.000118869	0.00342566	0.867662	SMAD2	protein_coding	up
ENSG00000101546.13	0.213314	2.0637	3.90619	0.000119246	0.00342903	0.950367	RBFA	protein_coding	up
ENSG00000130559.19	-0.10979	5.43644	-3.90497	0.000119818	0.00343799	0.890144	CAMSAP1	protein_coding	down
ENSG00000142937.12	-0.13265	8.6858	-3.90251	0.000120975	0.00346271	0.874131	RPS8	protein_coding	down
ENSG00000154122.14	0.287651	4.39864	3.90182	0.000121299	0.00346271	0.916904	ANKH	protein_coding	up
ENSG00000167207.13	-0.17924	6.84142	-3.90147	0.000121466	0.00346271	0.847619	NOD2	protein_coding	down
ENSG00000205268.10	0.19952	5.24915	3.90045	0.000121949	0.00346898	0.866967	PDE7A	protein_coding	up
ENSG00000137947.12	-0.136375	4.3928	-3.89952	0.000122392	0.00347408	0.921049	GTF2B	protein_coding	down
ENSG00000119242.8	0.230324	3.28989	3.898	0.000123122	0.00348127	0.952174	CCDC92	protein_coding	up
ENSG00000269984.1	-0.217981	1.94525	-3.89789	0.000123172	0.00348127	0.877715	AC078795.1	antisense	down
ENSG00000166275.15	-0.182313	4.37332	-3.89635	0.000123916	0.00349479	0.917735	BORCS7	protein_coding	down
ENSG00000164022.16	-0.0959002	4.84281	-3.89575	0.00012421	0.00349561	0.890826	AIMP1	protein_coding	down
ENSG00000086598.11	-0.117893	7.26732	-3.89506	0.000124544	0.00349575	0.831693	TMED2	protein_coding	down
ENSG00000052841.15	0.0691651	6.7485	3.89464	0.000124744	0.00349575	0.825776	TTC17	protein_coding	up
ENSG00000101109.12	0.0754916	8.5647	3.89326	0.000125421	0.00349735	0.83295	STK4	protein_coding	up
ENSG00000140443.14	0.294798	5.3387	3.89325	0.000125422	0.00349735	0.839562	IGF1R	protein_coding	up
ENSG00000143226.13	0.169615	9.08388	3.89249	0.000125798	0.00349735	0.839938	FCGR2A	protein_coding	up
ENSG00000281376.1	0.429403	2.21338	3.89236	0.000125861	0.00349735	0.918765	ABALON	antisense	up
ENSG00000151466.12	0.166843	5.97072	3.88957	0.000127235	0.00352357	0.814151	SCLT1	protein_coding	up
ENSG00000143621.17	-0.121545	5.8955	-3.88936	0.000127339	0.00352357	0.826005	ILF2	protein_coding	down
ENSG00000117335.19	0.117201	7.94667	3.88841	0.000127814	0.00352931	0.806771	CD46	protein_coding	up
ENSG00000113615.13	-0.144338	5.87767	-3.88778	0.000128123	0.00353047	0.813255	SEC24A	protein_coding	down
ENSG00000125952.19	0.108813	6.75874	3.88572	0.000129157	0.00355061	0.786265	MAX	protein_coding	up
ENSG00000138101.18	0.222398	1.9299	3.88525	0.000129392	0.00355061	0.864557	DTNB	protein_coding	up
ENSG00000147168.12	0.313046	5.20402	3.88235	0.000130861	0.00358348	0.808482	IL2RG	protein_coding	up
ENSG00000184381.18	0.270301	1.80783	3.88147	0.000131312	0.00358839	0.844257	PLA2G6	protein_coding	up
ENSG00000147669.11	-0.206218	3.95405	-3.87716	0.000133529	0.0036207	0.871438	POLR2K	protein_coding	down
ENSG00000168067.12	0.127083	4.92824	3.87647	0.000133886	0.0036207	0.795494	MAP4K2	protein_coding	up
ENSG00000120686.12	-0.108732	5.44119	-3.8762	0.000134026	0.0036207	0.802207	UFM1	protein_coding	down
ENSG00000161036.13	0.15844	3.59991	3.87617	0.000134042	0.0036207	0.860092	LRWD1	protein_coding	up
ENSG00000089041.17	-0.195974	6.11232	-3.87555	0.000134365	0.0036207	0.774102	P2RX7	protein_coding	down
ENSG00000106603.18	0.160781	4.93257	3.87555	0.000134368	0.0036207	0.790461	COA1	protein_coding	up
ENSG00000128011.4	0.23661	2.46519	3.87546	0.000134415	0.0036207	0.87413	LRFN1	protein_coding	up
ENSG00000164164.16	-0.1256	6.4407	-3.87428	0.000135031	0.0036238	0.75435	OTUD4	protein_coding	down
ENSG00000174840.9	-0.107675	5.54716	-3.87419	0.000135079	0.0036238	0.770271	PDE12	protein_coding	down
ENSG00000107372.13	-0.132631	8.59413	-3.87123	0.000136637	0.00365127	0.756737	ZFAND5	protein_coding	down
ENSG00000108244.16	0.585232	1.93166	3.8712	0.000136656	0.00365127	0.837408	KRT23	protein_coding	up
ENSG00000115756.13	0.153424	5.45728	3.87029	0.000137138	0.00365545	0.756958	HPCAL1	protein_coding	up
ENSG00000135720.13	-0.11727	6.24352	-3.86986	0.000137367	0.00365545	0.737952	DYNC1LI2	protein_coding	down
ENSG00000214309.5	0.305884	-0.0114776	3.86632	0.000139267	0.00369447	0.360541	MBLAC1	protein_coding	up
ENSG00000131979.19	-0.223395	6.09357	-3.86609	0.000139393	0.00369447	0.739763	GCH1	protein_coding	down
ENSG00000143797.12	0.238322	3.95564	3.86291	0.000141117	0.00373267	0.796185	MBOAT2	protein_coding	up
ENSG00000122406.13	-0.107795	8.62588	-3.86104	0.000142146	0.00375238	0.724045	RPL5	protein_coding	down
ENSG00000188895.11	0.138935	7.27426	3.85651	0.000144661	0.00381114	0.684765	MSL1	protein_coding	up
ENSG00000005961.18	0.900246	2.24339	3.85549	0.000145229	0.00381848	0.805546	ITGA2B	protein_coding	up
ENSG00000168497.5	0.841749	3.36377	3.85418	0.000145967	0.00383026	0.794097	CAVIN2	protein_coding	up
ENSG00000158828.8	0.170549	5.40708	3.85197	0.000147221	0.00385551	0.689017	PINK1	protein_coding	up
ENSG00000101966.12	-0.127116	5.94011	-3.85119	0.000147667	0.00385953	0.677886	XIAP	protein_coding	down
ENSG00000164463.12	0.132491	6.55261	3.85014	0.000148266	0.00386753	0.661246	CREBRF	protein_coding	up
ENSG00000159086.15	-0.117459	5.57415	-3.84914	0.000148842	0.00387277	0.688216	PAXBP1	protein_coding	down
ENSG00000185420.19	0.200926	1.4732	3.84835	0.000149297	0.00387277	0.680282	SMYD3	protein_coding	up
ENSG00000135503.13	-0.165342	5.2845	-3.8479	0.000149556	0.00387277	0.691978	ACVR1B	protein_coding	down
ENSG00000165156.15	-0.111664	5.17231	-3.84775	0.000149642	0.00387277	0.705085	ZHX1	protein_coding	down
ENSG00000116030.16	-0.115246	5.58378	-3.84724	0.000149935	0.00387277	0.69314	SUMO1	protein_coding	down
ENSG00000183597.15	0.14728	5.5691	3.84516	0.000151149	0.00389651	0.660094	TANGO2	protein_coding	up
ENSG00000274180.1	0.226685	4.70353	3.84465	0.000151445	0.00389654	0.703151	NATD1	protein_coding	up
ENSG00000272368.2	0.245792	0.561691	3.84334	0.000152213	0.00390868	0.432118	AC074032.1	antisense	up
ENSG00000118496.5	-0.148354	4.7944	-3.84185	0.000153091	0.00392343	0.689984	FBXO30	protein_coding	down
ENSG00000116786.13	-0.105413	6.31095	-3.84122	0.000153462	0.00392343	0.640637	PLEKHM2	protein_coding	down
ENSG00000136783.10	-0.175924	4.77288	-3.84081	0.000153704	0.00392343	0.711086	NIPSNAP3A	protein_coding	down
ENSG00000108960.9	0.38395	3.73676	3.84035	0.000153977	0.00392343	0.728713	MMD	protein_coding	up
ENSG00000273841.5	-0.125489	4.84036	-3.83939	0.00015455	0.00393045	0.690654	TAF9	protein_coding	down
ENSG00000241837.7	-0.125531	5.53653	-3.83644	0.000156315	0.00396769	0.654186	ATP5PO	protein_coding	down
ENSG00000221983.7	0.208063	8.38151	3.83578	0.000156712	0.00397013	0.62681	UBA52	protein_coding	up
ENSG00000106948.16	0.1345	8.53414	3.82944	0.000160588	0.00406054	0.607339	AKNA	protein_coding	up
ENSG00000089289.16	-0.143692	6.08897	-3.82777	0.000161618	0.00407878	0.608243	IGBP1	protein_coding	down
ENSG00000170889.14	-0.18123	9.05001	-3.82463	0.000163581	0.00412044	0.601194	RPS9	protein_coding	down
ENSG00000114861.20	0.112557	7.216	3.82363	0.000164211	0.00412343	0.567755	FOXP1	protein_coding	up
ENSG00000080200.10	-0.140815	6.17465	-3.82345	0.000164325	0.00412343	0.596819	CRYBG3	protein_coding	down
ENSG00000133606.11	0.201627	7.56025	3.82216	0.000165145	0.00413614	0.567822	MKRN1	protein_coding	up
ENSG00000089009.15	-0.110207	8.7138	-3.82074	0.000166045	0.00415081	0.587241	RPL6	protein_coding	down
ENSG00000272419.6	0.220464	4.6061	3.81757	0.000168082	0.00417473	0.605651	LINC01145	transcribed_unprocessed_pseudogene	up
ENSG00000170345.10	-0.261021	10.8561	-3.81744	0.000168162	0.00417473	0.611129	FOS	protein_coding	down
ENSG00000259207.7	0.869637	3.76102	3.81737	0.000168213	0.00417473	0.643126	ITGB3	protein_coding	up
ENSG00000172239.14	-0.120594	4.5894	-3.81713	0.000168365	0.00417473	0.625307	PAIP1	protein_coding	down
ENSG00000136156.14	0.132491	9.69335	3.81679	0.000168583	0.00417473	0.584363	ITM2B	protein_coding	up
ENSG00000151176.8	-0.212731	5.94275	-3.81457	0.000170023	0.00420019	0.572214	PLBD2	protein_coding	down
ENSG00000213658.11	0.32654	2.20024	3.81423	0.000170248	0.00420019	0.659227	LAT	protein_coding	up
ENSG00000133026.12	0.303852	2.32112	3.80891	0.000173756	0.00427873	0.646762	MYH10	protein_coding	up
ENSG00000125835.18	-0.121189	5.46912	-3.80744	0.00017474	0.00429496	0.551023	SNRPB	protein_coding	down
ENSG00000274290.2	0.28786	2.24177	3.80443	0.000176764	0.00433664	0.631075	HIST1H2BE	protein_coding	up
ENSG00000184900.15	-0.158044	5.90402	-3.80393	0.000177101	0.00433684	0.521869	SUMO3	protein_coding	down
ENSG00000095564.14	-0.120153	7.18933	-3.8011	0.000179027	0.00436847	0.493253	BTAF1	protein_coding	down
ENSG00000154727.10	-0.0866042	5.9598	-3.80106	0.000179055	0.00436847	0.513167	GABPA	protein_coding	down
ENSG00000127870.17	-0.119017	5.53564	-3.79985	0.000179885	0.00438063	0.517388	RNF6	protein_coding	down
ENSG00000141337.12	0.134109	5.10651	3.79846	0.000180843	0.00439585	0.509572	ARSG	protein_coding	up
ENSG00000164305.19	-0.199426	4.53877	-3.79715	0.000181754	0.0044097	0.553887	CASP3	protein_coding	down
ENSG00000140463.14	0.146895	2.42945	3.79668	0.000182081	0.0044097	0.607422	BBS4	protein_coding	up
ENSG00000101104.12	0.203516	2.72731	3.79346	0.000184332	0.00445603	0.60269	PABPC1L	protein_coding	up
ENSG00000261114.1	-0.282196	2.01327	-3.79195	0.000185401	0.00447368	0.554804	AC012181.1	sense_intronic	down
ENSG00000085491.17	-0.146651	5.90088	-3.79122	0.000185921	0.00447804	0.494364	SLC25A24	protein_coding	down
ENSG00000106617.14	-0.126212	6.04575	-3.78971	0.000186995	0.00449571	0.460636	PRKAG2	protein_coding	down
ENSG00000260078.3	0.355561	2.17843	3.78613	0.000189562	0.00454914	0.568974	AC007342.3	transcribed_unprocessed_pseudogene	up
ENSG00000126698.11	-0.118687	5.77142	-3.78433	0.000190871	0.00457225	0.465835	DNAJC8	protein_coding	down
ENSG00000203668.2	-0.146088	5.19644	-3.78365	0.000191367	0.00457251	0.482152	CHML	protein_coding	down
ENSG00000011566.15	-0.14936	3.77021	-3.78307	0.000191785	0.00457251	0.544265	MAP4K3	protein_coding	down
ENSG00000277161.2	0.200113	2.0524	3.78289	0.000191922	0.00457251	0.541342	PIGW	protein_coding	up
ENSG00000136240.10	-0.102646	5.64001	-3.78122	0.000193147	0.00459341	0.446928	KDELR2	protein_coding	down
ENSG00000162419.12	-0.113565	4.74248	-3.77997	0.000194069	0.00459938	0.47495	GMEB1	protein_coding	down
ENSG00000243660.10	0.217312	2.86438	3.77993	0.000194094	0.00459938	0.556134	ZNF487	protein_coding	up
ENSG00000022840.16	0.202596	7.30134	3.77782	0.000195659	0.00462813	0.409996	RNF10	protein_coding	up
ENSG00000157551.19	0.438763	3.54616	3.77345	0.000198942	0.00469739	0.517159	KCNJ15	protein_coding	up
ENSG00000198948.12	0.794111	1.81621	3.77237	0.000199762	0.00470832	0.499908	MFAP3L	protein_coding	up
ENSG00000156467.9	-0.128362	5.91748	-3.76743	0.000203544	0.00478468	0.424425	UQCRB	protein_coding	down
ENSG00000159322.17	-0.0851683	7.27228	-3.7672	0.000203727	0.00478468	0.374724	ADPGK	protein_coding	down
ENSG00000170832.13	0.1018	7.2584	3.76558	0.00020498	0.00479094	0.366191	USP32	protein_coding	up
ENSG00000069493.15	0.259836	3.89458	3.7655	0.000205046	0.00479094	0.46822	CLEC2D	protein_coding	up
ENSG00000242609.1	0.399512	-0.0393308	3.76545	0.000205082	0.00479094	0.0360135	AC105265.2	processed_pseudogene	up
ENSG00000182093.15	0.201925	2.97072	3.76332	0.000206747	0.00481456	0.499928	WRB	protein_coding	up
ENSG00000166900.17	0.160713	5.88886	3.76322	0.000206823	0.00481456	0.361593	STX3	protein_coding	up
ENSG00000107331.17	0.192909	4.39881	3.76014	0.000209258	0.00486266	0.42079	ABCA2	protein_coding	up
ENSG00000167280.16	-0.219505	5.55362	-3.75933	0.000209901	0.00486903	0.378625	ENGASE	protein_coding	down
ENSG00000052795.13	-0.178805	5.517	-3.75819	0.000210812	0.00488159	0.378768	FNIP2	protein_coding	down
ENSG00000171490.13	-0.139013	6.87979	-3.75594	0.000212616	0.00491475	0.350076	RSL1D1	protein_coding	down
ENSG00000107897.19	-0.11421	4.97767	-3.75344	0.000214639	0.00495283	0.380974	ACBD5	protein_coding	down
ENSG00000057663.16	-0.0963468	4.6845	-3.75229	0.000215576	0.00496577	0.393255	ATG5	protein_coding	down
ENSG00000174720.16	-0.127061	4.64945	-3.75034	0.000217167	0.00499371	0.397868	LARP7	protein_coding	down
ENSG00000141380.14	-0.0974867	5.91779	-3.74841	0.000218766	0.00502174	0.326442	SS18	protein_coding	down
ENSG00000144741.17	0.142407	2.86147	3.74604	0.000220735	0.00505309	0.443628	SLC25A26	protein_coding	up
ENSG00000172270.19	0.245359	7.01912	3.74584	0.000220898	0.00505309	0.298058	BSG	protein_coding	up
ENSG00000270882.2	0.295264	4.47684	3.74353	0.000222839	0.00508826	0.36029	HIST2H4A	protein_coding	up
ENSG00000080839.11	0.145377	3.54361	3.74309	0.000223206	0.00508826	0.411385	RBL1	protein_coding	up
ENSG00000100354.21	0.137577	7.76625	3.74171	0.000224375	0.00510607	0.287921	TNRC6B	protein_coding	up
ENSG00000070476.15	0.089754	5.84539	3.73818	0.000227387	0.00515595	0.277738	ZXDC	protein_coding	up
ENSG00000111711.10	-0.133694	4.5445	-3.73781	0.000227703	0.00515595	0.350236	GOLT1B	protein_coding	down
ENSG00000102753.10	-0.141433	5.49462	-3.73737	0.00022808	0.00515595	0.302246	KPNA3	protein_coding	down
ENSG00000162851.8	-0.159617	2.10242	-3.73731	0.000228129	0.00515595	0.390228	TFB2M	protein_coding	down
ENSG00000085760.14	-0.1311	3.74754	-3.73564	0.000229577	0.00516776	0.390261	MTIF2	protein_coding	down
ENSG00000135070.15	0.15372	4.39761	3.73535	0.000229826	0.00516776	0.334209	ISCA1	protein_coding	up
ENSG00000136897.8	-0.184091	3.33325	-3.73468	0.000230412	0.00516776	0.400093	MRPL50	protein_coding	down
ENSG00000055163.20	0.211672	6.38389	3.73456	0.000230511	0.00516776	0.258324	CYFIP2	protein_coding	up
ENSG00000079308.19	0.464407	4.23347	3.73409	0.000230921	0.00516776	0.355582	TNS1	protein_coding	up
ENSG00000119950.21	0.208844	5.93111	3.734	0.000231001	0.00516776	0.26019	MXI1	protein_coding	up
ENSG00000184481.16	0.192319	5.33901	3.73315	0.000231741	0.00517556	0.273324	FOXO4	protein_coding	up
ENSG00000161057.12	-0.126558	5.05104	-3.73241	0.000232389	0.00517893	0.316164	PSMC2	protein_coding	down
ENSG00000161654.9	-0.0910704	6.05099	-3.73208	0.000232677	0.00517893	0.262213	LSM12	protein_coding	down
ENSG00000204397.7	-0.14915	5.91765	-3.73044	0.000234122	0.00520003	0.286614	CARD16	protein_coding	down
ENSG00000109606.13	-0.0927555	7.00055	-3.73011	0.000234413	0.00520003	0.24604	DHX15	protein_coding	down
ENSG00000166797.11	-0.153104	5.2532	-3.72348	0.000240343	0.00532263	0.28386	CIAO2A	protein_coding	down
ENSG00000180628.15	0.160165	6.79861	3.72204	0.000241648	0.00534256	0.213028	PCGF5	protein_coding	up
ENSG00000130830.15	0.187859	6.8176	3.72124	0.000242369	0.00534955	0.20977	MPP1	protein_coding	up
ENSG00000138785.15	-0.112463	3.30939	-3.7195	0.00024396	0.00537567	0.347099	INTS12	protein_coding	down
ENSG00000186814.14	0.172258	2.74941	3.71798	0.00024536	0.00539751	0.352457	ZSCAN30	protein_coding	up
ENSG00000178935.5	0.162857	3.02498	3.71701	0.000246256	0.00540391	0.341773	ZNF552	protein_coding	up
ENSG00000269145.2	0.20556	2.05167	3.71678	0.00024647	0.00540391	0.329041	AC007192.2	antisense	up
ENSG00000169084.13	0.176257	3.14952	3.71559	0.000247578	0.00540774	0.334492	DHRSX	protein_coding	up
ENSG00000139372.15	-0.123332	4.70892	-3.71521	0.000247925	0.00540774	0.266459	TDG	protein_coding	down
ENSG00000163527.9	-0.0837348	7.51623	-3.71483	0.000248283	0.00540774	0.201368	STT3B	protein_coding	down
ENSG00000163933.10	0.14076	3.76631	3.71346	0.000249564	0.00542612	0.299376	RFT1	protein_coding	up
ENSG00000068383.19	0.142837	3.89576	3.71305	0.000249949	0.00542612	0.286874	INPP5A	protein_coding	up
ENSG00000169609.14	0.136483	3.68841	3.71194	0.000250992	0.00543157	0.294612	C15orf40	protein_coding	up
ENSG00000142039.4	0.12823	5.07568	3.71191	0.000251024	0.00543157	0.222434	CCDC97	protein_coding	up
ENSG00000149179.13	0.145508	2.38948	3.71085	0.000252021	0.00543648	0.325519	C11orf49	protein_coding	up
ENSG00000197321.14	0.14924	6.12334	3.71079	0.000252074	0.00543648	0.177353	SVIL	protein_coding	up
ENSG00000101421.4	-0.149178	6.59833	-3.7102	0.000252636	0.00543971	0.179698	CHMP4B	protein_coding	down
ENSG00000008441.16	0.250549	4.35895	3.70941	0.000253389	0.00544323	0.253496	NFIX	protein_coding	up
ENSG00000136381.13	-0.132294	6.83723	-3.70916	0.000253624	0.00544323	0.176631	IREB2	protein_coding	down
ENSG00000151470.13	0.178956	4.05776	3.70725	0.000255445	0.0054734	0.265171	C4orf33	protein_coding	up
ENSG00000134308.14	-0.0992184	6.81664	-3.70562	0.000257013	0.00549808	0.163431	YWHAQ	protein_coding	down
ENSG00000179542.16	-0.262068	3.88118	-3.70332	0.000259238	0.00553283	0.27973	SLITRK4	protein_coding	down
ENSG00000113163.16	-0.106539	7.17407	-3.70308	0.000259476	0.00553283	0.15193	COL4A3BP	protein_coding	down
ENSG00000169403.12	0.181305	7.87406	3.70183	0.000260686	0.00554967	0.15425	PTAFR	protein_coding	up
ENSG00000143774.16	0.201413	6.28718	3.69989	0.000262594	0.00557492	0.144927	GUK1	protein_coding	up
ENSG00000157500.12	-0.0980855	6.23148	-3.69976	0.000262717	0.00557492	0.158815	APPL1	protein_coding	down
ENSG00000008517.16	0.655154	0.831176	3.69699	0.000265458	0.00562405	0.135424	IL32	protein_coding	up
ENSG00000126432.14	0.160841	4.13684	3.69446	0.000267986	0.00566123	0.230804	PRDX5	protein_coding	up
ENSG00000259125.1	-0.465022	-1.19197	-3.69437	0.000268071	0.00566123	-0.76846	LRP1-AS	antisense	down
ENSG00000139921.13	-0.11382	6.03687	-3.69391	0.000268531	0.00566188	0.159442	TMX1	protein_coding	down
ENSG00000076053.10	-0.101759	5.18232	-3.69206	0.000270398	0.00568036	0.155747	RBM7	protein_coding	down
ENSG00000100902.10	-0.132681	5.55779	-3.69203	0.000270426	0.00568036	0.16901	PSMA6	protein_coding	down
ENSG00000060491.16	-0.104032	6.81419	-3.69176	0.000270698	0.00568036	0.125603	OGFR	protein_coding	down
ENSG00000104946.13	0.134283	4.08501	3.68818	0.000274342	0.00573447	0.195771	TBC1D17	protein_coding	up
ENSG00000147044.21	0.148085	3.97109	3.68808	0.000274451	0.00573447	0.200317	CASK	protein_coding	up
ENSG00000172113.9	0.110348	4.37809	3.68763	0.000274908	0.00573447	0.178252	NME6	protein_coding	up
ENSG00000122565.19	-0.130168	6.22838	-3.68753	0.000275015	0.00573447	0.125235	CBX3	protein_coding	down
ENSG00000135241.17	-0.169981	5.86404	-3.687	0.000275555	0.00573667	0.129448	PNPLA8	protein_coding	down
ENSG00000163545.8	0.197751	6.14645	3.68416	0.000278493	0.00578724	0.0900595	NUAK2	protein_coding	up
ENSG00000168288.13	-0.105088	5.22902	-3.68381	0.000278861	0.00578724	0.12972	MMADHC	protein_coding	down
ENSG00000101335.10	0.891532	0.574745	3.68317	0.000279523	0.00579187	0.0626341	MYL9	protein_coding	up
ENSG00000163131.11	-0.140548	11.8623	-3.68147	0.0002813	0.00581956	0.16222	CTSS	protein_coding	down
ENSG00000165527.7	-0.131352	7.92341	-3.68022	0.000282615	0.00583762	0.0814444	ARF6	protein_coding	down
ENSG00000136840.19	0.320708	2.99409	3.67861	0.000284317	0.0058636	0.215758	ST6GALNAC4	protein_coding	up
ENSG00000172292.14	-0.124215	6.46899	-3.67814	0.000284813	0.00586466	0.0804283	CERS6	protein_coding	down
ENSG00000174405.13	-0.134497	4.22993	-3.67727	0.00028574	0.00587457	0.161475	LIG4	protein_coding	down
ENSG00000228794.8	0.204566	2.17058	3.6722	0.000291184	0.0059772	0.194499	LINC01128	processed_transcript	up
ENSG00000105939.13	0.14162	7.20691	3.67114	0.000292345	0.00599171	0.0403972	ZC3HAV1	protein_coding	up
ENSG00000116754.13	-0.0822952	7.02464	-3.67064	0.000292881	0.0059934	0.0401543	SRSF11	protein_coding	down
ENSG00000220008.3	0.207651	4.04861	3.66909	0.000294577	0.00601877	0.129066	LINGO3	protein_coding	up
ENSG00000276180.1	0.282605	2.43731	3.66668	0.000297233	0.00606281	0.185517	HIST1H4I	protein_coding	up
ENSG00000125910.5	0.235053	5.31361	3.6663	0.000297651	0.00606281	0.0582958	S1PR4	protein_coding	up
ENSG00000158669.11	-0.121532	5.67714	-3.66405	0.000300148	0.00610424	0.0503134	GPAT4	protein_coding	down
ENSG00000185278.15	0.119867	6.01997	3.66084	0.000303747	0.00616794	0.0118103	ZBTB37	protein_coding	up
ENSG00000049449.9	-0.198985	3.9391	-3.65895	0.000305889	0.00619123	0.126188	RCN1	protein_coding	down
ENSG00000196182.10	0.132539	6.54893	3.65831	0.00030662	0.00619123	0.00295184	STK40	protein_coding	up
ENSG00000135899.17	0.160738	6.39221	3.6577	0.000307312	0.00619123	-0.00367852	SP110	protein_coding	up
ENSG00000203814.6	0.247891	4.82943	3.65758	0.000307448	0.00619123	0.0404901	HIST2H2BF	protein_coding	up
ENSG00000154814.14	0.232932	3.7558	3.65646	0.000308728	0.00619123	0.1066	OXNAD1	protein_coding	up
ENSG00000261270.1	-0.380288	2.15269	-3.65622	0.000309	0.00619123	0.131882	AC012181.2	sense_intronic	down
ENSG00000149218.5	0.275786	3.47894	3.65617	0.000309059	0.00619123	0.12174	ENDOD1	protein_coding	up
ENSG00000280433.1	0.203014	4.08973	3.65572	0.000309579	0.00619123	0.0837155	FP565260.6	protein_coding	up
ENSG00000111087.10	0.262657	1.23015	3.65569	0.000309607	0.00619123	0.0520797	GLI1	protein_coding	up
ENSG00000196187.12	0.131941	5.48028	3.65567	0.00030963	0.00619123	0.0172524	TMEM63A	protein_coding	up
ENSG00000213402.3	0.433695	1.77195	3.6553	0.000310054	0.00619123	0.125273	PTPRCAP	protein_coding	up
ENSG00000183696.14	-0.163382	5.74634	-3.65411	0.000311426	0.00620923	0.00940235	UPP1	protein_coding	down
ENSG00000204310.13	0.131813	4.83416	3.65123	0.000314766	0.00625568	0.0382797	AGPAT1	protein_coding	up
ENSG00000257093.7	0.152461	4.94443	3.65068	0.000315414	0.00625568	0.012965	KIAA1147	protein_coding	up
ENSG00000111275.13	-0.221418	7.27983	-3.65066	0.000315432	0.00625568	-0.00363776	ALDH2	protein_coding	down
ENSG00000163001.11	0.180112	1.68498	3.65047	0.000315664	0.00625568	0.0908007	CFAP36	protein_coding	up
ENSG00000084652.16	-0.0929946	5.8301	-3.65007	0.000316125	0.00625568	-0.0112301	TXLNA	protein_coding	down
ENSG00000198231.13	-0.110823	6.3783	-3.6494	0.000316908	0.00626178	-0.0253155	DDX42	protein_coding	down
ENSG00000168036.18	-0.112618	7.7056	-3.64852	0.00031795	0.00626943	-0.0257711	CTNNB1	protein_coding	down
ENSG00000136436.14	-0.0921945	7.11287	-3.64827	0.000318245	0.00626943	-0.0291649	CALCOCO2	protein_coding	down
ENSG00000110048.12	-0.12285	5.82726	-3.64614	0.000320767	0.00630167	-0.0227833	OSBP	protein_coding	down
ENSG00000155849.15	0.113265	6.60023	3.64608	0.000320837	0.00630167	-0.0453415	ELMO1	protein_coding	up
ENSG00000187118.13	-0.168074	3.53407	-3.64372	0.000323649	0.00633347	0.0897573	CMC1	protein_coding	down
ENSG00000163512.14	-0.139956	5.75894	-3.64345	0.000323968	0.00633347	-0.0138133	AZI2	protein_coding	down
ENSG00000156675.15	0.140278	8.23012	3.64343	0.000323993	0.00633347	-0.0401314	RAB11FIP1	protein_coding	up
ENSG00000087589.16	0.357903	3.6136	3.64311	0.000324375	0.00633347	0.0707896	CASS4	protein_coding	up
ENSG00000139117.14	-0.137538	4.73796	-3.64248	0.000325136	0.00633895	0.0269258	CPNE8	protein_coding	down
ENSG00000178802.18	0.1179	4.1107	3.6383	0.000330195	0.00642809	0.0230299	MPI	protein_coding	up
ENSG00000232098.3	0.249467	1.3766	3.63528	0.0003339	0.00649064	0.0115224	AC012313.1	lincRNA	up
ENSG00000082781.12	0.491309	1.57964	3.63408	0.000335389	0.00650999	0.0437271	ITGB5	protein_coding	up
ENSG00000222041.11	0.220174	4.17134	3.63275	0.000337037	0.00651386	-0.0031405	CYTOR	lincRNA	up
ENSG00000071073.13	0.179827	5.20527	3.63271	0.000337088	0.00651386	-0.0577886	MGAT4A	protein_coding	up
ENSG00000114391.13	-0.103135	7.06347	-3.63258	0.000337247	0.00651386	-0.0613508	RPL24	protein_coding	down
ENSG00000059145.18	0.139886	4.16679	3.63233	0.000337562	0.00651386	-0.000526648	UNKL	protein_coding	up
ENSG00000167671.12	0.210439	5.63855	3.63064	0.000339669	0.00654494	-0.0783149	UBXN6	protein_coding	up
ENSG00000183735.10	-0.140157	5.19564	-3.63003	0.000340429	0.00654827	-0.0427235	TBK1	protein_coding	down
ENSG00000104081.14	-0.216203	6.6554	-3.62971	0.000340833	0.00654827	-0.0814218	BMF	protein_coding	down
ENSG00000162711.17	-0.187016	7.00168	-3.62844	0.000342429	0.00656936	-0.0760004	NLRP3	protein_coding	down
ENSG00000178764.8	0.205901	3.7294	3.62799	0.000343001	0.00657079	0.0141225	ZHX2	protein_coding	up
ENSG00000101199.13	-0.108806	5.58162	-3.62494	0.000346876	0.00663539	-0.0924431	ARFGAP1	protein_coding	down
ENSG00000134815.19	0.157537	5.29553	3.62223	0.000350356	0.00669225	-0.100185	DHX34	protein_coding	up
ENSG00000027697.14	-0.158911	8.25342	-3.62097	0.000351989	0.00670371	-0.112431	IFNGR1	protein_coding	down
ENSG00000176142.13	-0.138352	4.54227	-3.62077	0.000352244	0.00670371	-0.0521308	TMEM39A	protein_coding	down
ENSG00000152256.13	0.149887	4.99893	3.62037	0.000352766	0.00670371	-0.0920277	PDK1	protein_coding	up
ENSG00000285106.1	0.280287	2.58514	3.61967	0.000353684	0.00670371	0.0346879	AC016831.7	lincRNA	up
ENSG00000103056.12	0.358454	1.8942	3.6195	0.000353892	0.00670371	0.0163789	SMPD3	protein_coding	up
ENSG00000180667.10	0.216819	5.88071	3.6193	0.000354155	0.00670371	-0.125217	YOD1	protein_coding	up
ENSG00000125354.23	0.130492	6.04415	3.61866	0.00035499	0.00670371	-0.132896	2025-09-06	protein_coding	up
ENSG00000204282.4	0.192233	4.01855	3.61864	0.000355019	0.00670371	-0.0358536	TNRC6C-AS1	processed_transcript	up
ENSG00000065534.18	0.530575	2.06474	3.61343	0.000361881	0.00682353	0.0068263	MYLK	protein_coding	up
ENSG00000099991.18	0.158356	5.87822	3.61229	0.000363408	0.00684254	-0.146544	CABIN1	protein_coding	up
ENSG00000166046.11	0.17903	5.94907	3.61003	0.000366433	0.00687893	-0.159978	TCP11L2	protein_coding	up
ENSG00000101040.19	0.158058	4.98883	3.6099	0.000366609	0.00687893	-0.120193	ZMYND8	protein_coding	up
ENSG00000120963.12	-0.124669	5.80142	-3.60968	0.000366904	0.00687893	-0.148741	ZNF706	protein_coding	down
ENSG00000164951.16	-0.140642	6.57049	-3.60874	0.000368169	0.00689002	-0.149286	PDP1	protein_coding	down
ENSG00000176783.15	0.106395	5.65867	3.60804	0.000369124	0.00689002	-0.142216	RUFY1	protein_coding	up
ENSG00000243678.11	-0.139087	5.37299	-3.60796	0.000369235	0.00689002	-0.101261	NME2	protein_coding	down
ENSG00000255302.4	-0.139765	6.32359	-3.60739	0.000370002	0.00689002	-0.139644	EID1	protein_coding	down
ENSG00000257218.6	-0.0862168	5.40822	-3.60731	0.000370106	0.00689002	-0.145796	GATC	protein_coding	down
ENSG00000107854.6	-0.101251	7.27978	-3.60503	0.000373222	0.00693825	-0.177007	TNKS2	protein_coding	down
ENSG00000069956.12	-0.155007	5.3289	-3.60406	0.000374557	0.00695328	-0.123839	MAPK6	protein_coding	down
ENSG00000129083.12	-0.0991184	6.56013	-3.60289	0.000376161	0.00697324	-0.180053	COPB1	protein_coding	down
ENSG00000167536.14	0.276569	1.84844	3.59993	0.00038026	0.00702699	-0.0447908	DHRS13	protein_coding	up
ENSG00000273247.5	0.194723	2.81307	3.59967	0.00038063	0.00702699	-0.0325368	AC097376.2	antisense	up
ENSG00000197746.14	-0.1307	11.6939	-3.59965	0.000380657	0.00702699	-0.112838	PSAP	protein_coding	down
ENSG00000164466.13	0.16894	3.41504	3.59865	0.00038205	0.00704169	-0.0646052	SFXN1	protein_coding	up
ENSG00000110700.7	-0.112002	7.48225	-3.59832	0.000382521	0.00704169	-0.180837	RPS13	protein_coding	down
ENSG00000034713.8	0.141363	5.41717	3.59634	0.000385304	0.00706021	-0.190586	GABARAPL2	protein_coding	up
ENSG00000067248.10	-0.105375	5.16389	-3.59604	0.000385727	0.00706021	-0.153837	DHX29	protein_coding	down
ENSG00000003987.14	-0.161051	2.65012	-3.59582	0.000386031	0.00706021	-0.040692	MTMR7	protein_coding	down
ENSG00000187231.14	-0.162208	6.06364	-3.59581	0.000386052	0.00706021	-0.192641	SESTD1	protein_coding	down
ENSG00000273587.1	0.662002	-1.95489	3.5957	0.000386201	0.00706021	-0.984163	SNORA78	snoRNA	up
ENSG00000156976.17	-0.100601	7.78676	-3.59387	0.000388792	0.00709774	-0.205704	EIF4A2	protein_coding	down
ENSG00000076662.10	0.177046	7.7088	3.59296	0.000390097	0.00711172	-0.21412	ICAM3	protein_coding	up
ENSG00000057704.13	0.236255	4.97265	3.58896	0.000395841	0.00720649	-0.197486	TMCC3	protein_coding	up
ENSG00000169896.17	-0.181377	8.88284	-3.58811	0.000397073	0.00721897	-0.211424	ITGAM	protein_coding	down
ENSG00000162385.11	-0.132668	3.49991	-3.58657	0.000399314	0.00724972	-0.0929246	MAGOH	protein_coding	down
ENSG00000165660.8	-0.120076	4.16364	-3.58618	0.000399884	0.0072501	-0.139194	ABRAXAS2	protein_coding	down
ENSG00000171566.12	-0.109272	4.41879	-3.58506	0.000401515	0.00726969	-0.147054	PLRG1	protein_coding	down
ENSG00000284428.1	0.235078	2.00421	3.58379	0.000403386	0.00729355	-0.0911415	AC092329.4	processed_transcript	up
ENSG00000104388.15	-0.0922985	6.44789	-3.58306	0.000404461	0.00730299	-0.245587	RAB2A	protein_coding	down
ENSG00000112234.9	0.107447	5.17128	3.58109	0.000407381	0.00733689	-0.220797	FBXL4	protein_coding	up
ENSG00000229456.1	0.355132	0.557084	3.58104	0.000407451	0.00733689	-0.265089	RLIMP1	processed_pseudogene	up
ENSG00000067369.13	0.127635	4.65753	3.57856	0.000411162	0.00739363	-0.21142	TP53BP1	protein_coding	up
ENSG00000138449.10	0.218153	6.1887	3.57758	0.000412632	0.00740998	-0.256548	SLC40A1	protein_coding	up
ENSG00000170921.15	0.177626	4.60906	3.57643	0.000414363	0.00743095	-0.214106	TANC2	protein_coding	up
ENSG00000166340.17	-0.160728	8.92726	-3.57199	0.000421126	0.00754199	-0.264047	TPP1	protein_coding	down
ENSG00000137814.11	-0.112828	4.34924	-3.57146	0.000421942	0.00754468	-0.196778	HAUS2	protein_coding	down
ENSG00000107281.10	0.396944	0.0449179	3.57115	0.00042242	0.00754468	-0.475734	NPDC1	protein_coding	up
ENSG00000204472.13	-0.121717	7.74727	-3.5703	0.000423723	0.00755774	-0.276898	AIF1	protein_coding	down
ENSG00000058668.14	0.162474	6.96942	3.56986	0.0004244	0.00755959	-0.295466	ATP2B4	protein_coding	up
ENSG00000090013.10	0.206593	5.64713	3.56698	0.000428878	0.00762875	-0.281469	BLVRB	protein_coding	up
ENSG00000285851.1	0.247551	2.34314	3.56662	0.000429439	0.00762875	-0.133496	AL359762.3	processed_transcript	up
ENSG00000118260.15	0.10219	6.72246	3.56616	0.000430156	0.00763122	-0.307617	CREB1	protein_coding	up
ENSG00000153922.10	-0.125797	7.29581	-3.56351	0.000434321	0.00769477	-0.313144	CHD1	protein_coding	down
ENSG00000196305.17	0.152842	4.9865	3.56277	0.000435486	0.00770506	-0.267045	IARS	protein_coding	up
ENSG00000113643.9	-0.143911	4.90532	-3.56069	0.000438795	0.007742	-0.251499	RARS	protein_coding	down
ENSG00000011485.14	0.237582	4.12926	3.56012	0.000439692	0.007742	-0.231987	PPP5C	protein_coding	up
ENSG00000102158.19	-0.110333	6.34114	-3.56001	0.00043987	0.007742	-0.312974	MAGT1	protein_coding	down
ENSG00000104687.14	-0.126958	6.37613	-3.55951	0.000440668	0.007742	-0.312854	GSR	protein_coding	down
ENSG00000117118.9	-0.0860641	5.33955	-3.55936	0.000440921	0.007742	-0.272893	SDHB	protein_coding	down
ENSG00000106066.15	-0.165889	8.13253	-3.55925	0.000441093	0.007742	-0.303617	CPVL	protein_coding	down
ENSG00000142765.18	0.163757	5.23019	3.55853	0.000442251	0.00775202	-0.306612	SYTL1	protein_coding	up
ENSG00000164219.10	-0.0925658	6.19192	-3.55794	0.000443197	0.00775607	-0.321355	PGGT1B	protein_coding	down
ENSG00000110756.17	-0.113671	4.90595	-3.55765	0.000443658	0.00775607	-0.269809	HPS5	protein_coding	down
ENSG00000156958.15	0.113181	3.63927	3.55682	0.000444999	0.00776924	-0.204384	GALK2	protein_coding	up
ENSG00000171307.19	0.106075	3.4283	3.55488	0.000448142	0.00780879	-0.200416	ZDHHC16	protein_coding	up
ENSG00000101162.3	0.674837	4.97928	3.55469	0.000448448	0.00780879	-0.304181	TUBB1	protein_coding	up
ENSG00000164889.14	-0.108315	5.62489	-3.55142	0.000453801	0.00789158	-0.327601	SLC4A2	protein_coding	down
ENSG00000228242.6	0.20979	3.18607	3.55033	0.000455596	0.00790952	-0.206368	AC093495.1	antisense	up
ENSG00000112096.18	0.161926	9.29978	3.54981	0.000456451	0.00790952	-0.328022	SOD2	protein_coding	up
ENSG00000116685.16	0.0875276	6.14018	3.54971	0.00045663	0.00790952	-0.35845	KIAA2013	protein_coding	up
ENSG00000075413.18	0.121431	6.15491	3.54733	0.000460573	0.00796738	-0.369445	MARK3	protein_coding	up
ENSG00000145982.12	0.157604	3.04398	3.54642	0.000462096	0.00798325	-0.210535	FARS2	protein_coding	up
ENSG00000170876.7	0.132273	6.40822	3.54576	0.000463194	0.00799177	-0.374948	TMEM43	protein_coding	up
ENSG00000146083.12	0.11639	6.8175	3.54518	0.000464176	0.00799825	-0.36125	RNF44	protein_coding	up
ENSG00000070770.9	-0.137662	6.04513	-3.54461	0.000465127	0.00800388	-0.367077	CSNK2A2	protein_coding	down
ENSG00000103066.13	-0.169839	4.1848	-3.54426	0.000465716	0.00800388	-0.27234	PLA2G15	protein_coding	down
ENSG00000092871.16	0.1013	6.16056	3.54277	0.000468239	0.00803678	-0.384997	RFFL	protein_coding	up
ENSG00000100216.6	-0.100176	5.27194	-3.5414	0.00047056	0.00805853	-0.334824	TOMM22	protein_coding	down
ENSG00000111540.16	0.127711	6.72944	3.54131	0.000470727	0.00805853	-0.388543	RAB5B	protein_coding	up
ENSG00000135842.17	0.27227	7.17055	3.53984	0.000473235	0.00809096	-0.397176	FAM129A	protein_coding	up
ENSG00000281571.2	0.258917	2.54008	3.53813	0.000476165	0.00813053	-0.223206	AC241585.2	TEC	up
ENSG00000025796.14	-0.128288	5.89661	-3.53774	0.000476836	0.00813147	-0.378242	SEC63	protein_coding	down
ENSG00000127527.14	0.1206	4.95825	3.53486	0.000481819	0.00820584	-0.365045	EPS15L1	protein_coding	up
ENSG00000096401.8	-0.112015	5.83682	-3.53363	0.000483963	0.00823174	-0.391108	CDC5L	protein_coding	down
ENSG00000160991.16	0.161296	6.20867	3.53204	0.000486754	0.00826489	-0.422265	ORAI2	protein_coding	up
ENSG00000196967.10	0.1543	2.77496	3.53181	0.000487165	0.00826489	-0.2458	ZNF585A	protein_coding	up
ENSG00000260917.1	0.164251	2.55912	3.5297	0.000490883	0.00830411	-0.248112	AL158212.3	sense_overlapping	up
ENSG00000101460.13	0.384387	-0.0238852	3.52956	0.000491121	0.00830411	-0.614383	MAP1LC3A	protein_coding	up
ENSG00000082014.16	-0.155876	6.22629	-3.52943	0.000491363	0.00830411	-0.409033	SMARCD3	protein_coding	down
ENSG00000118308.15	0.106381	5.9974	3.52903	0.000492071	0.00830542	-0.42374	LRMP	protein_coding	up
ENSG00000213380.15	0.0900055	4.74439	3.52667	0.000496268	0.00836557	-0.383987	COG8	protein_coding	up
ENSG00000155545.19	-0.146323	4.06902	-3.52603	0.000497421	0.00837089	-0.325723	MIER3	protein_coding	down
ENSG00000143919.15	0.181751	1.54574	3.52563	0.000498141	0.00837089	-0.305327	CAMKMT	protein_coding	up
ENSG00000113761.12	0.117559	3.44511	3.52544	0.000498486	0.00837089	-0.301252	ZNF346	protein_coding	up
ENSG00000197063.11	-0.179617	5.17385	-3.52447	0.000500217	0.00838238	-0.397843	MAFG	protein_coding	down
ENSG00000187650.3	0.132872	3.11936	3.52435	0.000500441	0.00838238	-0.285742	VMAC	protein_coding	up
ENSG00000213694.5	-0.22486	6.00554	-3.52268	0.00050346	0.00842227	-0.425502	S1PR3	protein_coding	down
ENSG00000130695.15	-0.13894	4.62613	-3.52215	0.000504414	0.00842338	-0.376237	CEP85	protein_coding	down
ENSG00000038427.16	-0.205226	12.3794	-3.52194	0.000504803	0.00842338	-0.353143	VCAN	protein_coding	down
ENSG00000149292.16	0.290941	1.11713	3.52126	0.000506036	0.00843329	-0.356419	TTC12	protein_coding	up
ENSG00000181163.13	-0.103918	6.91345	-3.52064	0.000507172	0.00844156	-0.441195	NPM1	protein_coding	down
ENSG00000046651.15	0.12724	3.59409	3.51992	0.000508489	0.00845283	-0.327608	OFD1	protein_coding	up
ENSG00000089351.14	0.147378	5.45652	3.51951	0.000509235	0.00845458	-0.435133	GRAMD1A	protein_coding	up
ENSG00000198920.10	0.108675	3.55355	3.51891	0.000510333	0.00846015	-0.325553	KIAA0753	protein_coding	up
ENSG00000182512.5	0.233362	4.52885	3.51863	0.000510852	0.00846015	-0.399307	GLRX5	protein_coding	up
ENSG00000106588.11	-0.126396	5.26276	-3.51683	0.000514177	0.00850454	-0.414442	PSMA2	protein_coding	down
ENSG00000185201.16	0.339017	6.98361	3.51458	0.000518357	0.00856295	-0.459245	IFITM2	protein_coding	up
ENSG00000108588.14	-0.131358	5.56352	-3.51191	0.000523355	0.0086347	-0.450576	CCDC47	protein_coding	down
ENSG00000277157.1	0.279437	2.09134	3.51136	0.000524389	0.00864096	-0.306399	HIST1H4D	protein_coding	up
ENSG00000228492.2	0.281551	1.77664	3.509	0.000528841	0.00870345	-0.330136	RAB11FIP1P1	processed_pseudogene	up
ENSG00000172331.12	0.279567	3.17128	3.50835	0.000530088	0.00871312	-0.344095	BPGM	protein_coding	up
ENSG00000106560.11	-0.159653	6.22025	-3.50757	0.000531576	0.0087267	-0.478058	GIMAP2	protein_coding	down
ENSG00000159873.10	-0.101695	5.21483	-3.50707	0.000532523	0.00873139	-0.463108	CCDC117	protein_coding	down
ENSG00000123384.13	-0.248688	10.2004	-3.50524	0.00053604	0.00877815	-0.454251	LRP1	protein_coding	down
ENSG00000163737.3	0.812955	2.54669	3.50443	0.000537588	0.0087926	-0.328566	PF4	protein_coding	up
ENSG00000181192.12	0.113658	5.02347	3.50381	0.000538794	0.00880141	-0.471585	DHTKD1	protein_coding	up
ENSG00000028116.17	-0.152281	5.02019	-3.50311	0.000540149	0.00881264	-0.448594	VRK2	protein_coding	down
ENSG00000122417.15	0.202317	2.53317	3.50141	0.000543436	0.00885532	-0.33667	ODF2L	protein_coding	up
ENSG00000235173.7	0.128758	2.85625	3.49952	0.000547132	0.00890456	-0.349583	HGH1	protein_coding	up
ENSG00000156261.13	-0.154236	6.40238	-3.49766	0.000550796	0.00895315	-0.505918	CCT8	protein_coding	down
ENSG00000168016.14	0.245119	6.34507	3.49699	0.000552112	0.0089542	-0.529418	TRANK1	protein_coding	up
ENSG00000132549.18	0.0957561	7.28979	3.49694	0.000552218	0.0089542	-0.538048	VPS13B	protein_coding	up
ENSG00000154059.11	-0.0986623	4.74591	-3.49582	0.000554433	0.00897909	-0.455593	IMPACT	protein_coding	down
ENSG00000135829.17	-0.0943116	7.24135	-3.49542	0.000555238	0.00898111	-0.533586	DHX9	protein_coding	down
ENSG00000115935.17	0.113954	8.4763	3.49477	0.000556514	0.00899073	-0.526784	WIPF1	protein_coding	up
ENSG00000124795.16	-0.0952251	7.12643	-3.49306	0.000559947	0.00903514	-0.533592	DEK	protein_coding	down
ENSG00000186260.16	0.187318	3.20489	3.49036	0.000565379	0.00910664	-0.393057	MRTFB	protein_coding	up
ENSG00000136527.18	-0.102964	7.92207	-3.48994	0.00056622	0.00910664	-0.549009	TRA2B	protein_coding	down
ENSG00000167522.16	0.0880394	7.15881	3.48983	0.000566448	0.00910664	-0.560587	ANKRD11	protein_coding	up
ENSG00000126001.16	0.125291	4.24237	3.48943	0.000567254	0.0091085	-0.466787	CEP250	protein_coding	up
ENSG00000197081.13	0.165619	8.57668	3.48733	0.00057153	0.009166	-0.547452	IGF2R	protein_coding	up
ENSG00000140396.13	0.0746643	7.41123	3.48585	0.000574557	0.00919954	-0.57289	NCOA2	protein_coding	up
ENSG00000117614.10	-0.104019	5.83905	-3.48563	0.000575015	0.00919954	-0.539099	SYF2	protein_coding	down
ENSG00000119318.13	-0.0992422	7.20364	-3.48484	0.000576637	0.00921432	-0.567963	RAD23B	protein_coding	down
ENSG00000185339.8	-0.298038	4.19414	-3.48437	0.000577596	0.00921848	-0.457526	TCN2	protein_coding	down
ENSG00000135916.16	0.328625	1.39298	3.48347	0.000579472	0.00923726	-0.433721	ITM2C	protein_coding	up
ENSG00000123329.18	0.146424	7.33259	3.48277	0.000580902	0.00924888	-0.582654	ARHGAP9	protein_coding	up
ENSG00000161956.13	-0.10362	4.83208	-3.48187	0.000582776	0.00925921	-0.515707	SENP3	protein_coding	down
ENSG00000124333.16	-0.106204	5.02617	-3.48145	0.000583655	0.00925921	-0.519658	VAMP7	protein_coding	down
ENSG00000166439.6	0.0670404	7.08425	3.48039	0.00058587	0.00927655	-0.593192	RNF169	protein_coding	up
ENSG00000090061.17	-0.124162	6.05998	-3.48002	0.000586647	0.00927655	-0.582504	CCNK	protein_coding	down
ENSG00000167261.14	0.163908	5.83182	3.47992	0.000586857	0.00927655	-0.583474	DPEP2	protein_coding	up
ENSG00000276991.1	0.469563	-1.3038	3.4776	0.000591734	0.00932467	-1.15263	RF01877	misc_RNA	up
ENSG00000136213.10	0.233722	3.81398	3.47757	0.000591777	0.00932467	-0.478768	CHST12	protein_coding	up
ENSG00000122299.12	-0.10732	6.2728	-3.47746	0.00059202	0.00932467	-0.585683	ZC3H7A	protein_coding	down
ENSG00000089505.17	0.323233	1.17837	3.47436	0.000598597	0.00941021	-0.494286	CMTM1	protein_coding	up
ENSG00000169045.17	-0.117407	8.2152	-3.47423	0.000598877	0.00941021	-0.597566	HNRNPH1	protein_coding	down
ENSG00000138593.9	-0.107987	6.36329	-3.47361	0.000600193	0.00941258	-0.604278	SECISBP2L	protein_coding	down
ENSG00000163754.17	-0.126643	5.54132	-3.47349	0.000600454	0.00941258	-0.57349	GYG1	protein_coding	down
ENSG00000104765.16	0.152892	8.1115	3.47276	0.000602016	0.00942587	-0.604744	BNIP3L	protein_coding	up
ENSG00000015676.18	0.0944149	5.19131	3.46995	0.000608063	0.00949041	-0.590477	NUDCD3	protein_coding	up
ENSG00000152700.14	-0.100299	6.01502	-3.4697	0.000608605	0.00949041	-0.609816	SAR1B	protein_coding	down
ENSG00000100104.13	0.15191	4.01992	3.46964	0.000608735	0.00949041	-0.523638	SRRD	protein_coding	up
ENSG00000196405.13	0.243779	5.75309	3.46951	0.000609014	0.00949041	-0.616117	EVL	protein_coding	up
ENSG00000023330.15	-0.159675	5.0505	-3.46891	0.000610315	0.00949273	-0.580689	ALAS1	protein_coding	down
ENSG00000015479.18	-0.0799661	7.73888	-3.46862	0.000610947	0.00949273	-0.617579	MATR3	protein_coding	down
ENSG00000155329.12	-0.159075	3.16835	-3.46845	0.000611321	0.00949273	-0.452233	ZCCHC10	protein_coding	down
ENSG00000103381.12	0.11225	8.50438	3.4679	0.000612515	0.0095001	-0.611505	CPPED1	protein_coding	up
ENSG00000111530.13	-0.0952967	6.4308	-3.46701	0.000614457	0.00951904	-0.626488	CAND1	protein_coding	down
ENSG00000100280.16	-0.12199	7.02665	-3.46603	0.000616614	0.00954126	-0.628797	AP1B1	protein_coding	down
ENSG00000078369.18	-0.0876505	8.50536	-3.4652	0.000618439	0.00955828	-0.621905	GNB1	protein_coding	down
ENSG00000175662.17	0.160011	4.61534	3.46469	0.000619551	0.00956428	-0.567859	TOM1L2	protein_coding	up
ENSG00000105202.9	-0.167014	5.38508	-3.46419	0.000620644	0.00956996	-0.593982	FBL	protein_coding	down
ENSG00000198130.16	0.203918	2.21257	3.46288	0.000623555	0.00960361	-0.453412	HIBCH	protein_coding	up
ENSG00000179295.17	-0.114038	6.5829	-3.45873	0.000632811	0.00972466	-0.647669	PTPN11	protein_coding	down
ENSG00000214562.14	0.263612	2.09554	3.4587	0.000632887	0.00972466	-0.467341	NUTM2D	protein_coding	up
ENSG00000113140.11	0.528859	3.45847	3.45772	0.000635074	0.00973856	-0.519791	SPARC	protein_coding	up
ENSG00000125356.7	-0.147836	4.49346	-3.45764	0.000635268	0.00973856	-0.546223	NDUFA1	protein_coding	down
ENSG00000100410.8	-0.14813	4.08253	-3.45685	0.000637042	0.00975443	-0.543774	PHF5A	protein_coding	down
ENSG00000166398.12	0.125156	4.63599	3.45475	0.000641809	0.00981056	-0.608936	KIAA0355	protein_coding	up
ENSG00000087266.16	-0.122537	8.40922	-3.45458	0.000642195	0.00981056	-0.658288	SH3BP2	protein_coding	down
ENSG00000104299.15	0.0933648	3.81103	3.45404	0.000643436	0.00981753	-0.543815	INTS9	protein_coding	up
ENSG00000065911.12	-0.136816	5.52375	-3.45373	0.000644138	0.00981753	-0.627198	MTHFD2	protein_coding	down
ENSG00000116212.15	-0.162062	2.053	-3.4524	0.00064718	0.00985251	-0.491208	LRRC42	protein_coding	down
ENSG00000170892.11	0.123444	5.36356	3.45131	0.00064968	0.00987918	-0.65751	TSEN34	protein_coding	up
ENSG00000165704.15	-0.165042	3.52071	-3.45001	0.000652674	0.00991328	-0.528563	HPRT1	protein_coding	down
ENSG00000006451.8	-0.158815	4.11003	-3.44939	0.000654122	0.00992145	-0.571618	RALA	protein_coding	down
ENSG00000153066.12	-0.121639	5.76635	-3.44913	0.000654715	0.00992145	-0.668233	TXNDC11	protein_coding	down
ENSG00000073792.15	0.22761	4.15835	3.44803	0.000657265	0.00994335	-0.603079	IGF2BP2	protein_coding	up
ENSG00000119471.15	0.161452	4.89365	3.44786	0.000657667	0.00994335	-0.639458	HSDL2	protein_coding	up
ENSG00000278705.1	0.255868	2.63241	3.44585	0.000662377	0.00999882	-0.510288	HIST1H4B	protein_coding	up
ENSG00000275023.4	0.128538	6.46677	3.44564	0.000662851	0.00999882	-0.702192	MLLT6	protein_coding	up
ENSG00000140563.15	0.357744	4.90049	3.44494	0.000664508	0.0100124	-0.660059	MCTP2	protein_coding	up
ENSG00000168175.15	-0.0998868	6.73908	-3.44446	0.00066563	0.0100178	-0.703298	MAPK1IP1L	protein_coding	down
ENSG00000111011.18	-0.0979748	5.9143	-3.44164	0.000672297	0.0101067	-0.697206	RSRC2	protein_coding	down
ENSG00000108091.11	-0.128549	6.54291	-3.4406	0.000674784	0.0101325	-0.704174	CCDC6	protein_coding	down
ENSG00000140526.18	0.14137	8.19596	3.44023	0.000675657	0.0101341	-0.707666	ABHD2	protein_coding	up
ENSG00000128789.21	-0.110476	5.55726	-3.43982	0.000676639	0.0101373	-0.68718	PSMG2	protein_coding	down
ENSG00000168300.14	0.131347	6.35397	3.43877	0.000679173	0.010153	-0.715966	PCMTD1	protein_coding	up
ENSG00000116205.14	0.0937475	4.29197	3.43843	0.000679969	0.010153	-0.633495	TCEANC2	protein_coding	up
ENSG00000139737.22	0.226928	1.64843	3.43802	0.00068096	0.010153	-0.549434	SLAIN1	protein_coding	up
ENSG00000121577.13	0.253662	-0.0466174	3.43798	0.000681059	0.010153	-0.879758	POPDC2	protein_coding	up
ENSG00000113407.13	-0.0918408	5.04616	-3.43778	0.000681532	0.010153	-0.65836	TARS	protein_coding	down
ENSG00000114120.12	-0.104841	6.02991	-3.43703	0.000683353	0.0101686	-0.707165	SLC25A36	protein_coding	down
ENSG00000196810.4	0.177618	2.93179	3.43596	0.000685939	0.0101956	-0.551612	CTBP1-DT	antisense	up
ENSG00000159189.12	-0.673478	0.00342593	-3.43473	0.000688926	0.0102238	-0.881794	C1QC	protein_coding	down
ENSG00000125691.13	-0.109708	7.66392	-3.43454	0.000689384	0.0102238	-0.693914	RPL23	protein_coding	down
ENSG00000197815.4	0.272873	0.660252	3.43268	0.000693917	0.0102795	-0.688293	AC122129.1	antisense	up
ENSG00000197142.10	0.139992	5.12483	3.43216	0.000695196	0.0102869	-0.695752	ACSL5	protein_coding	up
ENSG00000226312.7	0.183221	2.73337	3.43129	0.000697326	0.0103068	-0.557287	CFLAR-AS1	antisense	up
ENSG00000164985.15	0.0896514	5.56253	3.42786	0.000705823	0.0104208	-0.739087	PSIP1	protein_coding	up
ENSG00000179021.10	-0.123759	5.00471	-3.42671	0.000708698	0.0104515	-0.697976	C3orf38	protein_coding	down
ENSG00000196459.14	0.138479	3.7344	3.42625	0.000709827	0.0104565	-0.63586	TRAPPC2	protein_coding	up
ENSG00000136521.13	-0.111858	5.472	-3.42563	0.000711391	0.0104678	-0.714804	NDUFB5	protein_coding	down
ENSG00000174695.10	-0.117837	7.29771	-3.42391	0.000715701	0.0105069	-0.754107	TMEM167A	protein_coding	down
ENSG00000180098.9	0.0993785	3.24406	3.42372	0.000716182	0.0105069	-0.602928	TRNAU1AP	protein_coding	up
ENSG00000084676.15	0.0934351	7.49333	3.42362	0.000716432	0.0105069	-0.77141	NCOA1	protein_coding	up
ENSG00000163736.4	0.753319	4.52807	3.42249	0.000719293	0.0105271	-0.695173	PPBP	protein_coding	up
ENSG00000127022.15	-0.117762	9.23077	-3.42245	0.000719409	0.0105271	-0.738891	CANX	protein_coding	down
ENSG00000038532.16	0.0915666	5.63414	3.42187	0.000720864	0.0105367	-0.762568	CLEC16A	protein_coding	up
ENSG00000198668.11	0.103045	7.86409	3.42148	0.000721863	0.0105397	-0.771008	CALM1	protein_coding	up
ENSG00000167106.12	0.363165	2.90242	3.4211	0.000722829	0.0105421	-0.592709	FAM102A	protein_coding	up
ENSG00000013810.19	0.111797	5.91123	3.4207	0.000723845	0.0105437	-0.771353	TACC3	protein_coding	up
ENSG00000267009.6	0.311383	-0.290219	3.42032	0.000724818	0.0105437	-0.967089	AC007780.1	processed_transcript	up
ENSG00000090554.13	0.233155	2.53783	3.42012	0.000725332	0.0105437	-0.585308	FLT3LG	protein_coding	up
ENSG00000007968.7	0.302937	4.13383	3.41816	0.000730352	0.0106038	-0.694224	E2F2	protein_coding	up
ENSG00000136802.11	0.12099	4.66372	3.41788	0.000731074	0.0106038	-0.72777	LRRC8A	protein_coding	up
ENSG00000114423.21	0.173869	4.0567	3.41632	0.000735093	0.0106504	-0.687983	CBLB	protein_coding	up
ENSG00000140932.10	0.401365	1.61457	3.41528	0.00073778	0.0106776	-0.607663	CMTM2	protein_coding	up
ENSG00000067900.8	-0.0793428	7.58803	-3.4147	0.00073929	0.0106831	-0.796582	ROCK1	protein_coding	down
ENSG00000128694.12	0.180424	1.5283	3.41451	0.000739779	0.0106831	-0.627141	OSGEPL1	protein_coding	up
ENSG00000143119.14	0.127075	8.2451	3.41264	0.00074464	0.0107415	-0.793445	CD53	protein_coding	up
ENSG00000260682.3	0.613952	-1.44329	3.41178	0.000746894	0.0107623	-1.21509	RN7SKP176	misc_RNA	up
ENSG00000271601.4	0.113361	5.33042	3.41131	0.000748129	0.0107683	-0.779486	LIX1L	protein_coding	up
ENSG00000175463.11	0.140711	5.49023	3.41082	0.000749429	0.0107753	-0.790082	TBC1D10C	protein_coding	up
ENSG00000198373.12	0.0825274	6.52619	3.40968	0.000752434	0.0108067	-0.816849	WWP2	protein_coding	up
ENSG00000107937.19	-0.106766	4.59512	-3.40927	0.000753501	0.0108103	-0.732855	GTPBP4	protein_coding	down
ENSG00000157303.11	0.405095	2.32552	3.40559	0.000763305	0.010939	-0.626385	SUSD3	protein_coding	up
ENSG00000136813.14	-0.106017	6.75096	-3.40492	0.000765088	0.0109527	-0.821013	ECPAS	protein_coding	down
ENSG00000067334.14	-0.108514	5.60719	-3.40263	0.000771262	0.0110291	-0.797414	DNTTIP2	protein_coding	down
ENSG00000178695.5	-0.149694	9.50366	-3.40208	0.00077274	0.0110335	-0.799069	KCTD12	protein_coding	down
ENSG00000204370.11	-0.0892444	5.95757	-3.40171	0.000773759	0.0110335	-0.806008	SDHD	protein_coding	down
ENSG00000163376.11	-0.262072	3.12764	-3.40159	0.000774077	0.0110335	-0.654266	KBTBD8	protein_coding	down
ENSG00000067606.17	0.245073	1.10658	3.40066	0.000776602	0.0110576	-0.708038	PRKCZ	protein_coding	up
ENSG00000213585.11	-0.105458	5.90855	-3.39993	0.000778601	0.0110656	-0.811644	VDAC1	protein_coding	down
ENSG00000240859.2	-0.269937	3.1423	-3.39958	0.000779542	0.0110656	-0.661278	AC093627.4	lincRNA	down
ENSG00000085265.11	-0.194176	11.0547	-3.39953	0.000779682	0.0110656	-0.77209	FCN1	protein_coding	down
ENSG00000155099.8	0.125083	4.8008	3.39853	0.000782433	0.0110927	-0.797069	PIP4P2	protein_coding	up
ENSG00000248487.9	0.187363	1.49031	3.39731	0.000785774	0.0111281	-0.682017	ABHD14A	protein_coding	up
ENSG00000087274.17	0.126934	7.48235	3.39624	0.000788707	0.0111577	-0.858485	ADD1	protein_coding	up
ENSG00000167895.14	0.125688	6.40251	3.39455	0.000793389	0.0112119	-0.86292	TMC8	protein_coding	up
ENSG00000132670.20	0.0945828	5.76105	3.39181	0.000801025	0.0112843	-0.857278	PTPRA	protein_coding	up
ENSG00000119686.10	-0.222718	5.14468	-3.39173	0.000801244	0.0112843	-0.809705	FLVCR2	protein_coding	down
ENSG00000102032.13	-0.152779	4.22678	-3.39132	0.0008024	0.0112843	-0.755966	RENBP	protein_coding	down
ENSG00000140750.17	-0.138232	6.29387	-3.39108	0.000803072	0.0112843	-0.86469	ARHGAP17	protein_coding	down
ENSG00000119013.9	-0.139575	3.02429	-3.391	0.000803303	0.0112843	-0.677297	NDUFB3	protein_coding	down
ENSG00000107960.11	0.140111	4.44919	3.39088	0.000803638	0.0112843	-0.799808	STN1	protein_coding	up
ENSG00000149658.18	-0.0947605	5.62709	-3.39	0.00080612	0.0113071	-0.852586	YTHDF1	protein_coding	down
ENSG00000164096.13	-0.0952794	6.21318	-3.38807	0.000811561	0.0113697	-0.865906	C4orf3	protein_coding	down
ENSG00000276136.1	0.302543	0.285817	3.38781	0.000812304	0.0113697	-0.859612	AC016957.2	lincRNA	up
ENSG00000115355.16	-0.119912	7.7693	-3.38717	0.000814121	0.011383	-0.870627	CCDC88A	protein_coding	down
ENSG00000035115.21	0.183413	2.68577	3.38619	0.000816904	0.0114099	-0.692043	SH3YL1	protein_coding	up
ENSG00000171813.14	-0.135875	4.42709	-3.38547	0.000818965	0.0114266	-0.797021	PWWP2B	protein_coding	down
ENSG00000103966.11	-0.200513	6.12204	-3.38507	0.000820116	0.0114305	-0.874524	EHD4	protein_coding	down
ENSG00000158428.4	-0.289016	2.79461	-3.38474	0.000821065	0.0114317	-0.692598	CATIP	protein_coding	down
ENSG00000173281.5	0.23478	4.24321	3.38182	0.000829452	0.0115363	-0.814116	PPP1R3B	protein_coding	up
ENSG00000134802.17	-0.145636	5.89834	-3.38097	0.00083192	0.0115584	-0.87059	SLC43A3	protein_coding	down
ENSG00000263072.6	0.193401	1.81114	3.37912	0.00083731	0.0116082	-0.712899	ZNF213-AS1	antisense	up
ENSG00000114978.18	-0.0785507	9.16997	-3.37902	0.000837582	0.0116082	-0.881287	MOB1A	protein_coding	down
ENSG00000239521.8	0.184185	2.02749	3.37883	0.000838141	0.0116082	-0.705909	CASTOR3	protein_coding	up
ENSG00000119280.16	0.264969	2.16932	3.37754	0.000841913	0.0116482	-0.708411	C1orf198	protein_coding	up
ENSG00000014914.21	-0.193412	5.60016	-3.37683	0.000844026	0.0116652	-0.874427	MTMR11	protein_coding	down
ENSG00000123405.14	0.163314	6.36517	3.37404	0.000852242	0.0117665	-0.925391	NFE2	protein_coding	up
ENSG00000115806.13	-0.0877133	5.32721	-3.37281	0.000855905	0.0118047	-0.895071	GORASP2	protein_coding	down
ENSG00000103227.18	0.190648	2.65259	3.37202	0.000858264	0.0118142	-0.733934	LMF1	protein_coding	up
ENSG00000184007.21	-0.117283	8.67038	-3.37198	0.000858386	0.0118142	-0.907272	PTP4A2	protein_coding	down
ENSG00000074621.14	0.133786	3.47956	3.36817	0.000869832	0.0119593	-0.790921	SLC24A1	protein_coding	up
ENSG00000150961.15	-0.103631	6.05531	-3.36609	0.000876152	0.012029	-0.943735	SEC24D	protein_coding	down
ENSG00000154945.7	-0.0989504	5.19831	-3.3659	0.000876723	0.012029	-0.909539	ANKRD40	protein_coding	down
ENSG00000015532.9	0.105217	3.97975	3.36239	0.00088748	0.0121639	-0.850711	XYLT2	protein_coding	up
ENSG00000101367.9	-0.0806815	7.08228	-3.36206	0.000888498	0.0121652	-0.960595	MAPRE1	protein_coding	down
ENSG00000197943.10	0.0978273	6.91637	3.35949	0.00089645	0.0122614	-0.978498	PLCG2	protein_coding	up
ENSG00000164054.15	0.140401	7.13763	3.35831	0.000900128	0.0122876	-0.979223	SHISA5	protein_coding	up
ENSG00000068796.16	0.142978	5.27635	3.35828	0.000900231	0.0122876	-0.944584	KIF2A	protein_coding	up
ENSG00000182389.19	0.354925	2.59427	3.35784	0.000901605	0.0122937	-0.774282	CACNB4	protein_coding	up
ENSG00000109113.20	-0.148893	4.48601	-3.35709	0.000903927	0.0123126	-0.873803	RAB34	protein_coding	down
ENSG00000155330.10	-0.138099	4.03472	-3.35456	0.000911911	0.0124086	-0.855968	C16orf87	protein_coding	down
ENSG00000154146.13	0.2449	5.81559	3.35322	0.000916132	0.0124532	-0.955546	NRGN	protein_coding	up
ENSG00000131652.14	-0.10622	3.60422	-3.35292	0.000917112	0.0124537	-0.834152	THOC6	protein_coding	down
ENSG00000105127.9	-0.0934055	5.37345	-3.35248	0.000918506	0.0124598	-0.960298	AKAP8	protein_coding	down
ENSG00000153914.16	-0.0938407	6.45982	-3.34983	0.000926966	0.0125616	-0.99892	SREK1	protein_coding	down
ENSG00000089006.16	-0.0832745	6.22905	-3.34927	0.000928767	0.0125731	-0.995188	SNX5	protein_coding	down
ENSG00000116473.14	-0.118535	7.20336	-3.3482	0.000932202	0.0126067	-1.00819	RAP1A	protein_coding	down
ENSG00000160710.16	0.0997364	8.81754	3.34777	0.000933602	0.0126127	-0.986998	ADAR	protein_coding	up
ENSG00000110955.9	-0.0751748	7.89029	-3.34697	0.000936189	0.0126271	-1.00341	ATP5F1B	protein_coding	down
ENSG00000164111.15	-0.146454	8.01013	-3.34685	0.000936582	0.0126271	-0.994628	ANXA5	protein_coding	down
ENSG00000281005.1	0.211606	3.74124	3.34632	0.000938281	0.0126371	-0.887326	LINC00921	lincRNA	up
ENSG00000103978.15	-0.0889147	5.01841	-3.34596	0.000939447	0.0126399	-0.957746	TMEM87A	protein_coding	down
ENSG00000170100.13	0.107004	3.24046	3.34523	0.00094184	0.0126592	-0.845897	ZNF778	protein_coding	up
ENSG00000081059.20	0.399858	3.85646	3.34431	0.00094483	0.0126865	-0.885274	TCF7	protein_coding	up
ENSG00000101557.15	-0.149982	5.06757	-3.34338	0.000947883	0.0127112	-0.970125	USP14	protein_coding	down
ENSG00000091436.17	-0.16545	6.03972	-3.34316	0.000948598	0.0127112	-0.992447	MAP3K20	protein_coding	down
ENSG00000087338.5	0.145965	4.09881	3.3416	0.000953718	0.0127669	-0.91651	GMCL1	protein_coding	up
ENSG00000165732.13	-0.128715	6.8703	-3.34066	0.00095683	0.0127955	-1.01528	DDX21	protein_coding	down
ENSG00000114054.14	0.0859408	4.11727	3.3387	0.000963307	0.0128691	-0.929751	PCCB	protein_coding	up
ENSG00000100207.18	0.106271	6.5646	3.33749	0.000967354	0.0129101	-1.04784	TCF20	protein_coding	up
ENSG00000166352.16	-0.206244	1.08436	-3.3362	0.000971649	0.0129543	-0.890235	C11orf74	protein_coding	down
ENSG00000100364.18	-0.149444	7.22529	-3.33523	0.00097491	0.0129816	-1.03729	KIAA0930	protein_coding	down
ENSG00000169504.15	-0.158795	6.25282	-3.33477	0.000976462	0.0129816	-1.02645	CLIC4	protein_coding	down
ENSG00000138641.17	0.0849218	6.3165	3.33472	0.000976644	0.0129816	-1.05515	HERC3	protein_coding	up
ENSG00000051382.8	-0.123876	6.02095	-3.33286	0.000982919	0.0130519	-1.0451	PIK3CB	protein_coding	down
ENSG00000165458.14	-0.104194	7.2671	-3.33241	0.000984457	0.0130591	-1.05279	INPPL1	protein_coding	down
ENSG00000162777.17	0.182212	4.74602	3.33203	0.000985745	0.0130631	-0.997008	DENND2D	protein_coding	up
ENSG00000112624.12	0.10574	6.10556	3.33096	0.000989371	0.013098	-1.05697	BICRAL	protein_coding	up
ENSG00000047578.13	0.089028	4.76551	3.33013	0.000992226	0.0131226	-1.01083	KIAA0556	protein_coding	up
ENSG00000129657.16	0.110499	7.87347	3.32973	0.000993569	0.0131272	-1.06157	SEC14L1	protein_coding	up
ENSG00000225636.1	0.309251	0.862573	3.32904	0.00099593	0.0131453	-0.921776	HNRNPA3P15	processed_pseudogene	up
ENSG00000102710.20	0.0995285	5.76499	3.32858	0.000997519	0.0131531	-1.05883	SUPT20H	protein_coding	up
ENSG00000188554.14	0.0856387	7.34957	3.32539	0.00100853	0.0132698	-1.07513	NBR1	protein_coding	up
ENSG00000068831.19	0.0958286	6.42458	3.32489	0.00101029	0.0132698	-1.08408	RASGRP2	protein_coding	up
ENSG00000185973.11	0.0928591	4.83254	3.3242	0.00101269	0.0132698	-1.02454	TMLHE	protein_coding	up
ENSG00000213918.10	0.168342	4.28137	3.32407	0.00101314	0.0132698	-0.983897	DNASE1	protein_coding	up
ENSG00000132780.17	0.123077	4.33571	3.32361	0.00101474	0.0132698	-0.991475	NASP	protein_coding	up
ENSG00000025156.12	-0.190961	2.91369	-3.32355	0.00101493	0.0132698	-0.882462	HSF2	protein_coding	down
ENSG00000230606.10	0.375838	0.344966	3.32324	0.00101604	0.0132698	-1.02786	AC092683.1	lincRNA	up
ENSG00000267317.2	0.195925	1.57994	3.32299	0.00101691	0.0132698	-0.88514	AC027307.2	antisense	up
ENSG00000146776.14	0.115005	4.84161	3.32291	0.00101717	0.0132698	-1.02128	ATXN7L1	protein_coding	up
ENSG00000124380.11	-0.115836	4.18043	-3.32285	0.00101739	0.0132698	-0.968714	SNRNP27	protein_coding	down
ENSG00000151689.13	-0.153373	2.72796	-3.32284	0.00101743	0.0132698	-0.877936	INPP1	protein_coding	down
ENSG00000167004.13	-0.125845	7.25273	-3.32083	0.00102446	0.0133484	-1.08418	PDIA3	protein_coding	down
ENSG00000164609.10	-0.100881	5.85034	-3.31988	0.00102782	0.0133677	-1.07287	SLU7	protein_coding	down
ENSG00000177575.12	-0.23647	6.99796	-3.31984	0.00102798	0.0133677	-1.06277	CD163	protein_coding	down
ENSG00000251192.7	0.16292	1.75174	3.31889	0.00103135	0.0133764	-0.886938	ZNF674	protein_coding	up
ENSG00000179051.14	-0.135201	6.94204	-3.31858	0.00103244	0.0133764	-1.09146	RCC2	protein_coding	down
ENSG00000100519.12	-0.10698	4.85225	-3.31857	0.00103245	0.0133764	-1.02086	PSMC6	protein_coding	down
ENSG00000130779.20	-0.0818314	7.02186	-3.31851	0.00103269	0.0133764	-1.10112	CLIP1	protein_coding	down
ENSG00000185261.14	0.300162	2.64983	3.3166	0.00103948	0.0134511	-0.900612	KIAA0825	protein_coding	up
ENSG00000095002.14	0.198404	2.54695	3.31586	0.0010421	0.0134705	-0.896605	MSH2	protein_coding	up
ENSG00000144283.21	0.147978	3.90435	3.31561	0.00104302	0.0134705	-0.985055	PKP4	protein_coding	up
ENSG00000284773.1	0.250214	1.70965	3.31406	0.00104857	0.0135281	-0.903175	AC114490.3	protein_coding	up
ENSG00000129295.9	0.48004	1.07701	3.31379	0.00104953	0.0135281	-0.949016	LRRC6	protein_coding	up
ENSG00000196199.14	0.102679	5.23507	3.31268	0.00105354	0.0135665	-1.08036	MPHOSPH8	protein_coding	up
ENSG00000124766.6	-0.227036	5.99531	-3.30974	0.00106424	0.0136909	-1.07936	SOX4	protein_coding	down
ENSG00000189043.10	-0.134998	5.45923	-3.30927	0.00106595	0.013697	-1.06961	NDUFA4	protein_coding	down
ENSG00000109911.19	0.122824	4.40907	3.30904	0.00106678	0.013697	-1.03754	ELP4	protein_coding	up
ENSG00000232112.3	-0.133645	5.06459	-3.30854	0.00106863	0.0137073	-1.02513	TMA7	protein_coding	down
ENSG00000118263.15	0.105885	6.56181	3.30724	0.00107338	0.0137549	-1.14092	KLF7	protein_coding	up
ENSG00000060558.3	-0.156837	5.12748	-3.30574	0.00107893	0.0138126	-1.06875	GNA15	protein_coding	down
ENSG00000163249.12	-0.16755	4.81918	-3.30492	0.00108194	0.0138378	-1.06718	CCNYL1	protein_coding	down
ENSG00000104903.4	0.165771	5.52886	3.30419	0.00108466	0.0138527	-1.12402	LYL1	protein_coding	up
ENSG00000229047.1	-0.275125	1.56427	-3.30404	0.00108521	0.0138527	-0.946241	AF127577.1	antisense	down
ENSG00000170315.13	0.236189	7.26324	3.30366	0.00108664	0.0138575	-1.13608	UBB	protein_coding	up
ENSG00000196284.16	0.238949	1.17679	3.3031	0.00108872	0.0138707	-0.981371	SUPT3H	protein_coding	up
ENSG00000172530.20	0.148186	4.65722	3.30088	0.00109703	0.0139631	-1.09499	BANP	protein_coding	up
ENSG00000179526.17	0.155236	4.45129	3.30034	0.00109905	0.0139644	-1.08269	SHARPIN	protein_coding	up
ENSG00000135766.8	0.131898	6.27127	3.30029	0.00109925	0.0139644	-1.15873	EGLN1	protein_coding	up
ENSG00000135002.12	-0.148191	4.45574	-3.29999	0.00110038	0.0139653	-1.05048	RFK	protein_coding	down
ENSG00000022267.17	0.47207	1.37893	3.29781	0.0011086	0.0140561	-0.963445	FHL1	protein_coding	up
ENSG00000114473.14	0.138066	2.95763	3.29743	0.00111005	0.014061	-0.971275	IQCG	protein_coding	up
ENSG00000009954.11	-0.108853	6.37212	-3.29689	0.0011121	0.0140734	-1.16165	BAZ1B	protein_coding	down
ENSG00000163348.4	0.126445	4.39506	3.29642	0.00111387	0.0140823	-1.07999	PYGO2	protein_coding	up
ENSG00000122482.21	-0.110467	5.92325	-3.29569	0.00111665	0.0140938	-1.14891	ZNF644	protein_coding	down
ENSG00000117155.16	0.201954	2.48636	3.29555	0.0011172	0.0140938	-0.952776	SSX2IP	protein_coding	up
ENSG00000125755.18	-0.088009	6.30074	-3.29534	0.00111798	0.0140938	-1.16853	SYMPK	protein_coding	down
ENSG00000177156.11	0.130932	8.03296	3.29402	0.00112303	0.014144	-1.16589	TALDO1	protein_coding	up
ENSG00000266642.2	0.304011	0.756992	3.29269	0.00112814	0.0141948	-1.05077	AC024267.6	antisense	up
ENSG00000146192.15	-0.140089	7.51047	-3.29223	0.00112992	0.0142037	-1.17284	FGD2	protein_coding	down
ENSG00000140199.11	0.0941938	7.96594	3.28808	0.00114604	0.0143813	-1.1897	SLC12A6	protein_coding	up
ENSG00000215421.9	0.099372	5.18631	3.2879	0.00114675	0.0143813	-1.16307	ZNF407	protein_coding	up
ENSG00000166598.15	-0.150176	7.75869	-3.28775	0.00114732	0.0143813	-1.1824	HSP90B1	protein_coding	down
ENSG00000126945.9	-0.0974302	6.12038	-3.287	0.00115028	0.0144047	-1.17316	HNRNPH2	protein_coding	down
ENSG00000124172.10	0.177819	6.89626	3.28408	0.00116178	0.0145349	-1.19777	ATP5F1E	protein_coding	up
ENSG00000103351.13	0.209263	1.89823	3.28334	0.00116473	0.0145554	-0.983959	CLUAP1	protein_coding	up
ENSG00000096968.13	-0.133821	7.31416	-3.28311	0.00116562	0.0145554	-1.19852	JAK2	protein_coding	down
ENSG00000260257.2	0.158583	2.55466	3.28196	0.0011702	0.0145987	-0.993938	AL035071.1	lincRNA	up
ENSG00000138757.14	-0.0975408	6.45919	-3.28091	0.00117437	0.0146314	-1.2087	G3BP2	protein_coding	down
ENSG00000166997.8	0.176801	2.03796	3.28075	0.00117505	0.0146314	-0.989591	CNPY4	protein_coding	up
ENSG00000140416.21	0.197882	3.17859	3.28047	0.00117614	0.0146314	-1.03422	TPM1	protein_coding	up
ENSG00000196684.12	0.214605	5.25001	3.27951	0.00117998	0.0146654	-1.19472	HSH2D	protein_coding	up
ENSG00000168056.15	0.267988	2.71726	3.27808	0.00118576	0.0147232	-1.01802	LTBP3	protein_coding	up
ENSG00000146223.14	-0.0890682	5.93206	-3.277	0.00119012	0.0147635	-1.20952	RPL7L1	protein_coding	down
ENSG00000130640.13	-0.104194	6.43318	-3.27452	0.00120022	0.0148749	-1.2292	TUBGCP2	protein_coding	down
ENSG00000196072.12	-0.115897	4.95753	-3.27384	0.00120299	0.0148881	-1.15672	BLOC1S2	protein_coding	down
ENSG00000115275.12	-0.0911452	5.23705	-3.2737	0.00120354	0.0148881	-1.18664	MOGS	protein_coding	down
ENSG00000163162.8	0.136857	7.4378	3.27311	0.00120596	0.014904	-1.2405	RNF149	protein_coding	up
ENSG00000181638.18	0.169303	2.49552	3.27282	0.00120716	0.0149049	-1.02033	ZFP41	protein_coding	up
ENSG00000266714.9	-0.170396	7.14566	-3.27193	0.0012108	0.0149358	-1.2411	MYO15B	protein_coding	down
ENSG00000188511.12	0.285447	2.54757	3.27116	0.00121398	0.0149507	-1.03004	C22orf34	lincRNA	up
ENSG00000267796.8	0.136624	2.55911	3.27109	0.00121427	0.0149507	-1.02711	LIN37	protein_coding	up
ENSG00000180233.11	-0.116495	5.61441	-3.27028	0.00121762	0.0149639	-1.22175	ZNRF2	protein_coding	down
ENSG00000170027.7	-0.114891	6.7586	-3.27008	0.00121843	0.0149639	-1.23442	YWHAG	protein_coding	down
ENSG00000260916.7	0.116444	7.03148	3.27001	0.00121875	0.0149639	-1.24788	CCPG1	protein_coding	up
ENSG00000115993.13	0.121407	5.93999	3.26919	0.00122212	0.0149728	-1.24771	TRAK2	protein_coding	up
ENSG00000284024.2	-0.0922005	4.17297	-3.269	0.00122291	0.0149728	-1.14105	HSPA14	protein_coding	down
ENSG00000110400.11	0.135669	4.13961	3.269	0.00122293	0.0149728	-1.13457	NECTIN1	protein_coding	up
ENSG00000108039.18	-0.0870825	5.43769	-3.26874	0.001224	0.0149728	-1.21838	XPNPEP1	protein_coding	down
ENSG00000182810.6	-0.112439	4.53579	-3.26818	0.00122633	0.0149874	-1.16568	DDX28	protein_coding	down
ENSG00000156313.13	0.137489	3.52414	3.2662	0.00123459	0.0150744	-1.10679	RPGR	protein_coding	up
ENSG00000275713.2	0.273235	1.9471	3.26476	0.00124065	0.0151343	-1.03518	HIST1H2BH	protein_coding	up
ENSG00000196549.10	0.583092	3.35739	3.26244	0.00125042	0.0152395	-1.09798	MME	protein_coding	up
ENSG00000065457.10	0.109232	4.14083	3.25925	0.00126405	0.0153913	-1.17748	ADAT1	protein_coding	up
ENSG00000138756.17	0.124035	6.78171	3.2589	0.00126552	0.015395	-1.28376	BMP2K	protein_coding	up
ENSG00000135363.12	-0.139802	6.51408	-3.25776	0.00127041	0.0154402	-1.26479	LMO2	protein_coding	down
ENSG00000271614.1	-0.242905	5.93661	-3.25647	0.001276	0.0154822	-1.23497	ATP2B1-AS1	lincRNA	down
ENSG00000088930.8	-0.0846414	7.13523	-3.25642	0.0012762	0.0154822	-1.27957	XRN2	protein_coding	down
ENSG00000260231.2	0.222338	2.69186	3.25522	0.0012814	0.0155309	-1.08061	KDM7A-DT	bidirectional_promoter_lncRNA	up
ENSG00000109917.11	-0.0979739	5.16053	-3.25469	0.0012837	0.0155404	-1.23805	ZPR1	protein_coding	down
ENSG00000234292.3	0.35808	0.241038	3.2545	0.00128453	0.0155404	-1.23846	AC123595.1	lincRNA	up
ENSG00000114013.16	-0.178161	6.86634	-3.25395	0.0012869	0.0155548	-1.26805	CD86	protein_coding	down
ENSG00000170043.11	0.116075	5.04723	3.25295	0.00129127	0.0155933	-1.23306	TRAPPC1	protein_coding	up
ENSG00000119929.13	0.120096	2.59431	3.25179	0.00129632	0.0156296	-1.08392	CUTC	protein_coding	up
ENSG00000148444.16	-0.109821	4.36046	-3.25172	0.00129664	0.0156296	-1.18543	COMMD3	protein_coding	down
ENSG00000225484.6	0.218449	5.03912	3.25058	0.00130164	0.0156755	-1.26682	NUTM2B-AS1	antisense	up
ENSG00000214900.9	0.236655	2.38047	3.25026	0.00130307	0.0156785	-1.08225	LINC01588	lincRNA	up
ENSG00000127838.14	-0.200305	5.65926	-3.24969	0.00130556	0.0156941	-1.27133	PNKD	protein_coding	down
ENSG00000198176.13	0.105279	5.29297	3.24925	0.00130751	0.0157032	-1.28481	TFDP1	protein_coding	up
ENSG00000165168.7	-0.13085	10.8046	-3.24818	0.00131227	0.015746	-1.24228	CYBB	protein_coding	down
ENSG00000157216.15	0.141347	4.96967	3.24736	0.00131591	0.0157596	-1.26381	SSBP3	protein_coding	up
ENSG00000100796.17	-0.0976471	6.98614	-3.24724	0.00131641	0.0157596	-1.31807	PPP4R3A	protein_coding	down
ENSG00000114520.11	-0.109357	4.23219	-3.24712	0.00131698	0.0157596	-1.18433	SNX4	protein_coding	down
ENSG00000198843.13	-0.111919	6.64363	-3.2465	0.00131972	0.0157781	-1.31032	SELENOT	protein_coding	down
ENSG00000176700.20	0.102872	4.34619	3.2461	0.0013215	0.0157792	-1.23421	SCAND2P	transcribed_unprocessed_pseudogene	up
ENSG00000185728.17	-0.0996552	7.18496	-3.24594	0.00132222	0.0157792	-1.32484	YTHDF3	protein_coding	down
ENSG00000108883.13	-0.0954624	6.81172	-3.24568	0.0013234	0.0157792	-1.3167	EFTUD2	protein_coding	down
ENSG00000179630.11	-0.184464	3.37162	-3.24479	0.00132735	0.0157987	-1.13446	LACC1	protein_coding	down
ENSG00000100897.17	0.0782798	5.91444	3.24477	0.00132743	0.0157987	-1.31535	DCAF11	protein_coding	up
ENSG00000120318.16	0.174354	4.97328	3.24413	0.00133031	0.0158186	-1.27771	ARAP3	protein_coding	up
ENSG00000101191.16	0.074971	6.38436	3.24281	0.00133626	0.0158667	-1.33727	DIDO1	protein_coding	up
ENSG00000165169.11	-0.130632	3.76046	-3.2427	0.00133675	0.0158667	-1.17028	DYNLT3	protein_coding	down
ENSG00000119523.10	-0.102405	4.3547	-3.2415	0.00134216	0.0159166	-1.23616	ALG2	protein_coding	down
ENSG00000111229.16	-0.0892244	8.00935	-3.24007	0.00134867	0.0159794	-1.32417	ARPC3	protein_coding	down
ENSG00000196419.12	-0.0853842	7.09291	-3.23686	0.00136332	0.0161385	-1.33696	XRCC6	protein_coding	down
ENSG00000279410.1	0.295004	0.511328	3.23601	0.00136724	0.0161705	-1.22729	AC099494.1	TEC	up
ENSG00000243279.4	0.190836	1.68874	3.23568	0.00136874	0.0161737	-1.12255	PRAF2	protein_coding	up
ENSG00000118298.12	-0.284875	0.761202	-3.23524	0.00137079	0.0161834	-1.24888	CA14	protein_coding	down
ENSG00000010539.11	0.168359	2.75329	3.23345	0.00137906	0.0162665	-1.14917	ZNF200	protein_coding	up
ENSG00000072778.20	-0.125441	7.16538	-3.23205	0.00138559	0.0163289	-1.3576	ACADVL	protein_coding	down
ENSG00000107036.12	-0.103885	7.1524	-3.23129	0.00138914	0.0163561	-1.3632	RIC1	protein_coding	down
ENSG00000001036.13	-0.0933552	5.32707	-3.23054	0.00139267	0.0163831	-1.30472	FUCA2	protein_coding	down
ENSG00000254614.2	0.440983	1.4707	3.22986	0.00139582	0.0164055	-1.14496	AP003068.2	antisense	up
ENSG00000114125.14	-0.124446	4.86436	-3.2279	0.00140507	0.0164995	-1.29674	RNF7	protein_coding	down
ENSG00000033011.12	0.114061	3.19835	3.22662	0.00141111	0.0165558	-1.19474	ALG1	protein_coding	up
ENSG00000116668.13	0.121291	3.41684	3.22538	0.001417	0.0166101	-1.21724	SWT1	protein_coding	up
ENSG00000114450.10	-0.097846	7.28394	-3.22356	0.00142569	0.0166818	-1.38259	GNB4	protein_coding	down
ENSG00000157800.18	0.181824	3.35702	3.22343	0.00142632	0.0166818	-1.22054	SLC37A3	protein_coding	up
ENSG00000123143.12	-0.113308	7.07654	-3.22331	0.00142691	0.0166818	-1.3887	PKN1	protein_coding	down
ENSG00000156482.11	-0.117181	7.7686	-3.22088	0.00143858	0.0167819	-1.37799	RPL30	protein_coding	down
ENSG00000189266.13	-0.0814032	6.8243	-3.22083	0.00143882	0.0167819	-1.39067	PNRC2	protein_coding	down
ENSG00000089775.11	0.126583	4.45499	3.22046	0.00144059	0.0167819	-1.32109	ZBTB25	protein_coding	up
ENSG00000160310.18	0.126633	5.81068	3.22045	0.00144064	0.0167819	-1.39146	PRMT2	protein_coding	up
ENSG00000235437.7	0.157997	2.7684	3.22021	0.00144182	0.0167819	-1.18283	LINC01278	processed_transcript	up
ENSG00000107949.17	-0.0860466	4.14124	-3.21923	0.00144659	0.0168224	-1.27226	BCCIP	protein_coding	down
ENSG00000068308.13	0.0672086	5.5648	3.21833	0.00145094	0.0168517	-1.39361	OTUD5	protein_coding	up
ENSG00000122507.20	0.135088	3.19701	3.21818	0.00145165	0.0168517	-1.22004	BBS9	protein_coding	up
ENSG00000072110.13	0.121892	7.10752	3.21703	0.00145729	0.0169022	-1.41509	ACTN1	protein_coding	up
ENSG00000197586.12	-0.0987238	5.41136	-3.21552	0.00146466	0.0169728	-1.37235	ENTPD6	protein_coding	down
ENSG00000186350.11	0.0876653	8.27414	3.21362	0.00147402	0.0170663	-1.40792	RXRA	protein_coding	up
ENSG00000108518.7	0.0956607	8.61214	3.21288	0.00147767	0.0170936	-1.4037	PFN1	protein_coding	up
ENSG00000162512.16	-0.340176	3.19938	-3.21236	0.00148027	0.0171087	-1.2206	SDC3	protein_coding	down
ENSG00000136819.15	0.147032	5.22384	3.21136	0.00148522	0.0171508	-1.38882	C9orf78	protein_coding	up
ENSG00000180061.9	-0.195323	3.2974	-3.21013	0.00149135	0.0171946	-1.2355	TMEM150B	protein_coding	down
ENSG00000151458.12	-0.160762	5.87275	-3.20987	0.00149265	0.0171946	-1.39111	ANKRD50	protein_coding	down
ENSG00000232973.12	-0.382325	3.71288	-3.20976	0.0014932	0.0171946	-1.26432	CYP1B1-AS1	antisense	down
ENSG00000240303.8	-0.132424	3.57752	-3.20956	0.00149422	0.0171946	-1.26568	ACAD11	protein_coding	down
ENSG00000244687.11	0.0937666	6.40192	3.20894	0.00149729	0.0172149	-1.43384	UBE2V1	protein_coding	up
ENSG00000169826.8	-0.112005	7.01172	-3.20749	0.00150458	0.0172837	-1.43496	CSGALNACT2	protein_coding	down
ENSG00000184060.11	-0.142155	5.24452	-3.20614	0.00151137	0.0173466	-1.38067	ADAP2	protein_coding	down
ENSG00000236345.1	0.236008	0.662718	3.205	0.00151717	0.0173856	-1.28405	SCAT8	antisense	up
ENSG00000153975.10	-0.129592	2.78488	-3.20443	0.00152003	0.0173856	-1.22363	ZUP1	protein_coding	down
ENSG00000068724.16	-0.123543	7.36547	-3.2041	0.00152174	0.0173856	-1.43598	TTC7A	protein_coding	down
ENSG00000198168.9	0.294843	1.85888	3.20402	0.00152211	0.0173856	-1.20664	SVIP	protein_coding	up
ENSG00000109458.8	0.0953679	5.05125	3.20386	0.00152297	0.0173856	-1.4095	GAB1	protein_coding	up
ENSG00000074935.14	0.174046	1.97326	3.2037	0.00152379	0.0173856	-1.20693	TUBE1	protein_coding	up
ENSG00000170919.15	0.128823	3.09119	3.20343	0.00152515	0.0173856	-1.25301	TPT1-AS1	processed_transcript	up
ENSG00000180953.11	0.283424	2.02793	3.2034	0.0015253	0.0173856	-1.20801	ST20	protein_coding	up
ENSG00000213337.9	0.135223	2.43216	3.2024	0.00153041	0.017424	-1.2204	ANKRD39	protein_coding	up
ENSG00000099308.10	0.146625	6.613	3.20222	0.00153131	0.017424	-1.44606	MAST3	protein_coding	up
ENSG00000187446.12	-0.118493	8.01769	-3.19926	0.00154652	0.0175689	-1.45514	CHP1	protein_coding	down
ENSG00000198721.12	0.130214	3.27495	3.19889	0.00154843	0.0175689	-1.28083	ECI2	protein_coding	up
ENSG00000105374.10	0.435297	2.51087	3.19873	0.00154927	0.0175689	-1.23548	NKG7	protein_coding	up
ENSG00000119335.16	-0.0701915	7.96984	-3.19871	0.00154937	0.0175689	-1.45095	SET	protein_coding	down
ENSG00000181800.5	0.178174	4.68835	3.19691	0.00155871	0.017656	-1.39434	CELF2-AS1	antisense	up
ENSG00000145391.13	-0.145057	6.29214	-3.19648	0.00156095	0.017656	-1.4544	SETD7	protein_coding	down
ENSG00000169682.18	-0.133119	5.47632	-3.19614	0.00156271	0.017656	-1.43202	SPNS1	protein_coding	down
ENSG00000072818.12	0.145314	5.28531	3.19609	0.00156295	0.017656	-1.44433	ACAP1	protein_coding	up
ENSG00000136758.18	-0.0683961	7.20155	-3.19574	0.00156478	0.017656	-1.47106	YME1L1	protein_coding	down
ENSG00000141298.19	0.14846	8.62371	3.19568	0.00156508	0.017656	-1.45524	SSH2	protein_coding	up
ENSG00000008869.12	0.0987493	5.89886	3.19467	0.00157039	0.0177007	-1.46657	HEATR5B	protein_coding	up
ENSG00000161021.13	0.0912239	6.21734	3.19361	0.00157594	0.0177482	-1.47739	MAML1	protein_coding	up
ENSG00000100941.9	-0.110696	5.85468	-3.19245	0.00158206	0.0177595	-1.46937	PNN	protein_coding	down
ENSG00000164144.16	0.137705	4.91986	3.1922	0.00158337	0.0177595	-1.40845	ARFIP1	protein_coding	up
ENSG00000176422.14	0.137709	3.46805	3.19215	0.00158365	0.0177595	-1.31678	SPRYD4	protein_coding	up
ENSG00000174456.14	0.114871	3.87568	3.19184	0.00158525	0.0177595	-1.35821	C12orf76	protein_coding	up
ENSG00000135828.11	0.15173	4.43425	3.1918	0.00158547	0.0177595	-1.39071	RNASEL	protein_coding	up
ENSG00000139675.12	0.199483	1.49444	3.19164	0.00158631	0.0177595	-1.25266	HNRNPA1L2	protein_coding	up
ENSG00000135637.13	0.105054	3.33586	3.19163	0.00158637	0.0177595	-1.31084	CCDC142	protein_coding	up
ENSG00000129292.20	0.103163	6.78351	3.19075	0.00159102	0.0177965	-1.4923	PHF20L1	protein_coding	up
ENSG00000169554.20	-0.125049	9.27421	-3.1904	0.0015929	0.0178025	-1.45721	ZEB2	protein_coding	down
ENSG00000223547.10	0.205927	3.41376	3.18971	0.00159654	0.0178137	-1.32484	ZNF844	protein_coding	up
ENSG00000168259.15	-0.0776184	6.21078	-3.1897	0.00159661	0.0178137	-1.47919	DNAJC7	protein_coding	down
ENSG00000174173.7	-0.122239	3.14753	-3.1875	0.00160832	0.0179293	-1.29293	TRMT10C	protein_coding	down
ENSG00000055950.16	0.0922874	4.16096	3.18719	0.00161002	0.017933	-1.38722	MRPL43	protein_coding	up
ENSG00000151332.19	-0.105664	3.07366	-3.18371	0.00162876	0.0181231	-1.30124	MBIP	protein_coding	down
ENSG00000154743.17	0.14856	1.94684	3.18351	0.00162983	0.0181231	-1.26298	TSEN2	protein_coding	up
ENSG00000168477.19	0.336094	-0.109312	3.18313	0.00163187	0.0181305	-1.48242	TNXB	protein_coding	up
ENSG00000115307.17	-0.0850174	6.71964	-3.18275	0.00163393	0.0181382	-1.51376	AUP1	protein_coding	down
ENSG00000066697.14	0.229542	1.09281	3.18	0.00164893	0.0182893	-1.31349	MSANTD3	protein_coding	up
ENSG00000106638.16	-0.16855	3.97392	-3.17908	0.00165399	0.0183216	-1.3833	TBL2	protein_coding	down
ENSG00000069849.11	-0.125919	5.4788	-3.17897	0.00165462	0.0183216	-1.48006	ATP1B3	protein_coding	down
ENSG00000087470.17	-0.0826018	5.84253	-3.178	0.00165993	0.0183442	-1.50245	DNM1L	protein_coding	down
ENSG00000142875.19	0.19857	5.14273	3.17798	0.00166008	0.0183442	-1.47777	PRKACB	protein_coding	up
ENSG00000110321.17	-0.0775751	9.34974	-3.17784	0.00166083	0.0183442	-1.49197	EIF4G2	protein_coding	down
ENSG00000280734.2	0.19463	2.31405	3.17747	0.00166288	0.0183515	-1.28621	LINC01232	processed_transcript	up
ENSG00000162591.16	0.24244	3.3571	3.17699	0.0016655	0.0183528	-1.36327	MEGF6	protein_coding	up
ENSG00000143013.13	-0.0928362	5.1896	-3.17667	0.00166727	0.0183528	-1.48696	LMO4	protein_coding	down
ENSG00000277224.2	0.253088	2.69894	3.17644	0.00166854	0.0183528	-1.31034	HIST1H2BF	protein_coding	up
ENSG00000156521.14	0.111142	3.48642	3.1764	0.00166875	0.0183528	-1.3647	TYSND1	protein_coding	up
ENSG00000150756.14	0.129899	2.46142	3.1761	0.00167044	0.0183528	-1.29513	ATPSCKMT	protein_coding	up
ENSG00000143554.14	-0.139197	5.74247	-3.17594	0.00167134	0.0183528	-1.49755	SLC27A3	protein_coding	down
ENSG00000214331.8	0.133885	3.49284	3.17569	0.00167274	0.0183529	-1.37106	AC009053.1	transcribed_unprocessed_pseudogene	up
ENSG00000132952.12	-0.109174	5.04547	-3.17489	0.00167715	0.018386	-1.48211	USPL1	protein_coding	down
ENSG00000176454.14	0.142696	3.11199	3.1746	0.00167876	0.0183883	-1.33858	LPCAT4	protein_coding	up
ENSG00000228474.6	0.128331	6.28196	3.17344	0.00168525	0.0184351	-1.54373	OST4	protein_coding	up
ENSG00000088854.12	-0.106972	4.72152	-3.17334	0.00168582	0.0184351	-1.46139	C20orf194	protein_coding	down
ENSG00000170677.6	-0.177431	4.0223	-3.16948	0.0017075	0.0186487	-1.40625	SOCS6	protein_coding	down
ENSG00000232859.9	0.180872	1.99285	3.16936	0.00170818	0.0186487	-1.30195	LYRM9	protein_coding	up
ENSG00000163867.17	-0.0964585	5.76298	-3.16809	0.00171537	0.0187117	-1.5354	ZMYM6	protein_coding	down
ENSG00000167528.12	0.13299	6.15768	3.16768	0.00171775	0.0187222	-1.55805	ZNF641	protein_coding	up
ENSG00000171051.8	0.199159	8.59503	3.16641	0.00172498	0.0187855	-1.5407	FPR1	protein_coding	up
ENSG00000174132.9	0.166804	2.16042	3.16441	0.0017364	0.0188943	-1.32026	FAM174A	protein_coding	up
ENSG00000142453.11	0.160029	4.75258	3.16386	0.00173959	0.0189041	-1.50575	CARM1	protein_coding	up
ENSG00000143772.9	0.10938	6.2711	3.16376	0.00174017	0.0189041	-1.57386	ITPKB	protein_coding	up
ENSG00000127334.10	0.11037	5.68617	3.16303	0.00174435	0.018934	-1.56166	DYRK2	protein_coding	up
ENSG00000196358.11	0.287449	3.77847	3.16258	0.00174696	0.0189467	-1.43986	NTNG2	protein_coding	up
ENSG00000048740.18	0.0894894	8.24307	3.16209	0.00174982	0.0189621	-1.56448	CELF2	protein_coding	up
ENSG00000123360.12	-0.159995	3.31977	-3.16137	0.001754	0.0189798	-1.38355	PDE1B	protein_coding	down
ENSG00000121749.15	-0.118349	5.12453	-3.16105	0.0017558	0.0189798	-1.52852	TBC1D15	protein_coding	down
ENSG00000095585.16	0.388236	0.396685	3.16092	0.00175658	0.0189798	-1.43991	BLNK	protein_coding	up
ENSG00000110958.16	-0.118334	6.80701	-3.16081	0.0017572	0.0189798	-1.57745	PTGES3	protein_coding	down
ENSG00000260233.3	0.20171	1.4645	3.16056	0.00175866	0.01898	-1.33707	SSSCA1-AS1	processed_transcript	up
ENSG00000263264.1	0.152517	3.83638	3.15946	0.00176508	0.0190338	-1.44437	AC119396.1	protein_coding	up
ENSG00000076944.16	-0.0841961	7.19028	-3.1589	0.00176835	0.0190476	-1.58359	STXBP2	protein_coding	down
ENSG00000197329.12	0.159517	6.99926	3.15875	0.00176925	0.0190476	-1.59043	PELI1	protein_coding	up
ENSG00000156735.11	-0.0983059	5.66098	-3.15784	0.00177453	0.0190889	-1.55961	BAG4	protein_coding	down
ENSG00000170088.14	-0.111793	4.47705	-3.15645	0.00178273	0.0191467	-1.48789	TMEM192	protein_coding	down
ENSG00000090659.18	-0.286348	1.85034	-3.15643	0.00178281	0.0191467	-1.33984	CD209	protein_coding	down
ENSG00000179222.17	0.16393	2.56158	3.1555	0.00178831	0.0191852	-1.35742	MAGED1	protein_coding	up
ENSG00000182220.14	-0.0918239	7.61432	-3.15533	0.0017893	0.0191852	-1.5814	ATP6AP2	protein_coding	down
ENSG00000107262.22	0.132996	5.67389	3.15448	0.00179436	0.0192105	-1.57729	BAG1	protein_coding	up
ENSG00000011304.20	-0.0780159	7.39333	-3.15444	0.00179457	0.0192105	-1.59586	PTBP1	protein_coding	down
ENSG00000197601.13	-0.106384	7.22874	-3.15401	0.00179712	0.0192222	-1.59596	FAR1	protein_coding	down
ENSG00000196329.11	0.233666	4.96661	3.15348	0.0018003	0.0192229	-1.534	GIMAP5	protein_coding	up
ENSG00000173812.11	-0.123968	9.33452	-3.1534	0.00180076	0.0192229	-1.56424	EIF1	protein_coding	down
ENSG00000197603.14	0.183066	3.54131	3.15321	0.00180189	0.0192229	-1.43546	CPLANE1	protein_coding	up
ENSG00000008083.14	-0.11984	7.18925	-3.15302	0.00180301	0.0192229	-1.60348	JARID2	protein_coding	down
ENSG00000284669.1	-0.18953	5.62236	-3.15259	0.00180559	0.0192349	-1.55893	AC092053.3	antisense	down
ENSG00000163235.16	0.287526	2.79332	3.15072	0.00181675	0.0193236	-1.38706	TGFA	protein_coding	up
ENSG00000117676.14	0.0754329	7.4748	3.15063	0.0018173	0.0193236	-1.60723	RPS6KA1	protein_coding	up
ENSG00000126773.13	0.0829091	5.66781	3.15038	0.00181877	0.0193236	-1.59626	PCNX4	protein_coding	up
ENSG00000168172.9	-0.112177	7.75469	-3.15022	0.00181977	0.0193236	-1.60066	HOOK3	protein_coding	down
ENSG00000214212.9	-0.118898	6.83853	-3.14968	0.001823	0.0193423	-1.60268	C19orf38	protein_coding	down
[truncated: 11,942 more rows]

## Sheet: Table_5 LRRK2viPD_GSEA
ID	Description	GeneRatio	BgRatio	pvalue	p.adjust	qvalue	geneID	Count	gene_reg	group
[truncated: 216 more rows]

[truncated: 6 more sheets: Table_6 iPDvCTR_DEGs, Table_7 Overlap_DEGs, Table_8 OverlapGSEA, Table_9 LRRK2viPD_Unique_DEGs, Table_10 LRRK2viPD_Unique_GSEA, Table_11 GBAviPD_Unique_DEGs]
