# Supplementary material for: Integrated Stress Response Signatures Drive Monocyte Dysfunction in GBA1- and LRRK2-Linked Parkinson’s Disease
Source: Research Square preprint supplement (doi:10.21203/rs.3.rs-8615050/v1), 2026-02-16
Supplement: Supplementary file 5 [file 895bd19c6fa4953f9d5a05cd.xlsx]

## Sheet: README
Section	Description
METHOD	Individual subject-level derivatives from GAM-fitted trajectories (scaled fluorescence ×10^-6 A.U.)
Key_Point	Each subject has unique smoothed trajectory and rate of change; covariates adjusted in-model; fluorescence scaled.
GAM	GAM model with subject-specific random effects + covariates (scaled response)
LMER	Linear mixed-effects model for overall slopes + covariates (scaled response)
Tests	Wilcoxon tests on individual subject rates (scaled dF/dt)
Derivatives	Subject-specific instantaneous rates (smoothed, scaled dF/dt, ×10^-6 A.U./h)
Fitted	Subject-specific fitted fluorescence values (smoothed, covariate-adjusted, scaled ×10^-6 A.U.)
Plot_Type	Use_This_Sheet	What_It_Tests	Interpretation
Fluorescence Trajectories (scaled)	LMER_Fixed	Group×time interactions (β coefficients) in scaled fluorescence, covariate-adjusted	Do groups accumulate fluorescence at different linear rates (after covariate adjustment, in scaled units)?
Fluorescence Trajectories (scaled)	LMER_Slope_Pairs	Direct pairwise slope comparisons in scaled units	How much do slopes differ between specific group pairs (scaled fluorescence per hour)?
Rate Changes (Derivatives, scaled)	Wilcoxon_Subjects	Overall subject-level rate differences between groups (scaled dF/dt)	Do subjects have different mean rates across entire experiment (scaled dF/dt)?
Rate Changes (Derivatives, scaled)	Wilcoxon_Timepoints	Time-point-specific rate differences (scaled dF/dt)	At which specific times do rates differ (scaled dF/dt)?
Subject Boxplots (mean scaled dF/dt)	Wilcoxon_Subjects	Same as Wilcoxon_Subjects (visual representation, scaled dF/dt)	Distribution of subject-level mean rates per group (scaled dF/dt)

## Sheet: Data_Summary
DQ-BSA
group	n_subjects
Control	20
GBA_PD	23
iPD	21
LRRK2_PD	20
Lysosensor Green
CTR	6
GBA_PD	6
iPD	6
LRRK2_PD	5
TAS2
CTR	6
GBA_PD	6
iPD	6
LRRK2_PD	5

## Sheet: Covariate_Screening
DQ-BSA
term	estimate	std.error	statistic	p.value
(Intercept)	-108.265	26.9277	-4.02058	6.02053e-05
time_elapsed_hours	-0.438179	0.159488	-2.74741	0.00606059
groupGBA_PD	37.7336	4.22392	8.93331	9.14473e-19
groupiPD	14.5099	4.28657	3.38497	0.000725587
groupLRRK2_PD	31.8915	4.27039	7.46805	1.20794e-13
age_at_draw	0.736615	0.116571	6.319	3.23534e-10
clinicNYUMD	93.9615	6.47077	14.5209	1.68151e-45
weeks_cryo	0.665128	0.092271	7.20841	7.98488e-13
ancestryNon-Jewish	-52.5268	5.03581	-10.4307	7.67632e-25
ancestrySephardic Jewish	-110.398	11.6015	-9.51582	4.97734e-21
sexMale	8.41162	2.51528	3.3442	0.000840402
assay_date_numeric	-0.222893	0.0152311	-14.634	3.76147e-46
date_of_draw_numeric	0.0840915	0.0133631	6.29284	3.81818e-10
LysoSensor Green
term	estimate	std.error	statistic	p.value
(Intercept)	-601.458	136.972	-4.3911	1.34703e-05
time_elapsed_hours	0.0724181	0.0109144	6.63511	7.61778e-11
groupGBA_PD	-2.026	0.282403	-7.17415	2.29922e-12
groupiPD	-2.13718	0.304336	-7.02243	6.29667e-12
groupLRRK2_PD	-2.59185	0.289777	-8.94429	5.35294e-18
sexMale	0.0173822	0.178242	0.0975201	0.922348
age_at_draw	0.00523853	0.0107183	0.488747	0.625211
weeks_cryo	1.51989	0.345407	4.40028	1.29308e-05
ancestryNon-Jewish	0.294829	0.485225	0.607613	0.543689
diagnosisPD
plate1	1.45019	0.190202	7.62447	1.0457e-13
date_of_draw_numeric	0.217907	0.0493625	4.41442	1.21404e-05
TAS2
term	estimate	std.error	statistic	p.value
(Intercept)	-7154.07	1179.69	-6.06436	2.81366e-09
time_elapsed_hours	2.50178	0.117555	21.2818	5.23514e-70
sexMale	5.29571	1.53513	3.44967	0.000614266
age_at_draw	-0.083655	0.0923128	-0.906213	0.365309
weeks_cryo	18.0704	2.97486	6.07437	2.65612e-09
groupGBA_PD	-18.9732	2.43223	-7.80074	4.35016e-14
groupiPD	-22.7741	2.62113	-8.68865	6.89824e-17
groupLRRK2_PD	-17.3536	2.49575	-6.95325	1.2656e-11
ancestryNon-Jewish	-13.1949	4.17906	-3.15738	0.0016992
diagnosisPD
plate1	14.507	1.63814	8.85576	1.94265e-17
date_of_draw_numeric	2.59732	0.425141	6.10931	2.17119e-09

## Sheet: Covariate_Fit
DQ-BSA
r.squared	adj.r.squared	sigma	statistic	p.value	df	logLik	AIC	BIC	deviance	df.residual	nobs
0.355896	0.352037	49.5697	92.2287	2.29484e-181	12	-10723.3	21474.5	21553.1	4.92169e+06	2003	2016
Lysosensor
r.squared	adj.r.squared	sigma	statistic	p.value	df	logLik	AIC	BIC	deviance	df.residual	nobs
0.318863	0.306786	1.88727	26.4027	2.72837e-41	10	-1175.54	2375.08	2427.33	2008.86	564	575
TAS2
r.squared	adj.r.squared	sigma	statistic	p.value	df	logLik	AIC	BIC	deviance	df.residual	nobs
0.624409	0.616044	14.5384	74.6449	5.67532e-89	10	-1878.47	3780.94	3830.51	94902.7	449	460

## Sheet: GAM_Parametric
GAM PARAMETRIC								GAM SMOOTHS
DQ-BSA
term	Estimate	Std. Error	t value	Pr(>|t|)	p.value			term	edf	Ref.df	F	p-value	p.value
(Intercept)	-118.089	125.31	-0.942379	0.346138	0.34614			s(time_elapsed_hours):groupControl	8.78514	8.97458	37.5123	0	<1e-10
groupGBA_PD	37.6218	19.9734	1.88359	0.0597979	0.05980			s(time_elapsed_hours):groupGBA_PD	8.85921	8.98616	57.5952	0	<1e-10
groupiPD	13.6826	20.2734	0.674904	0.499833	0.49983			s(time_elapsed_hours):groupiPD	8.69855	8.95744	26.7916	0	<1e-10
groupLRRK2_PD	31.0061	20.2056	1.53453	0.125094	0.12509			s(time_elapsed_hours):groupLRRK2_PD	8.84492	8.98416	50.2561	0	<1e-10
age_at_draw	0.816452	0.543868	1.5012	0.133499	0.13350			s(time_elapsed_hours,sample_id_factor)	340.316	404	77.2688	0	<1e-10
clinicNYUMD	89.1236	30.1896	2.95213	0.00320106	0.00320
weeks_cryo	0.656226	0.430494	1.52436	0.127614	0.12761
ancestryNon-Jewish	-50.6287	23.4947	-2.15489	0.0313164	0.03132
ancestrySephardic Jewish	-101.472	54.1271	-1.87469	0.0610137	0.06101
sexMale	8.74371	11.7351	0.745088	0.456326	0.45633
assay_date_numeric	-0.220531	0.0710614	-3.10338	0.00194613	0.00195
date_of_draw_numeric	0.0845013	0.0623458	1.35537	0.175489	0.17549
Lysosensor
term	Estimate	Std. Error	t value	Pr(>|t|)				term	edf	Ref.df	F	p-value
(Intercept)	-664.838	594.199	-1.11888	0.263773				s(time_elapsed_hours):groupCTR	8.53522	8.90179	18.0574	0
groupGBA_PD	-2.14331	1.29047	-1.66088	0.0974165				s(time_elapsed_hours):groupGBA_PD	4.70908	5.76275	1.80626	0.156555
groupiPD	-2.20999	1.41718	-1.55943	0.11958				s(time_elapsed_hours):groupiPD	1.00004	1.00006	1.65022	0.199566
groupLRRK2_PD	-2.49023	1.2135	-2.05211	0.0407221				s(time_elapsed_hours):groupLRRK2_PD	1.00013	1.00019	0.0156088	0.900924
weeks_cryo	1.68258	1.50017	1.12159	0.26262				s(time_elapsed_hours,sample_id_factor)	91.145	104	238.111	0
plate1	1.645	0.882631	1.86375	0.062992
date_of_draw_numeric	0.241312	0.214499	1.125	0.261173
TAS2
term	Estimate	Std. Error	t value	Pr(>|t|)				term	edf	Ref.df	F	p-value
(Intercept)	-7233.34	5248.63	-1.37814	0.169133				s(time_elapsed_hours):groupCTR	8.54747	8.86785	20.4936	0
groupGBA_PD	-19.1484	10.8222	-1.76936	0.0777964				s(time_elapsed_hours):groupGBA_PD	8.19489	8.70692	12.1821	0
groupiPD	-22.9209	11.6626	-1.96533	0.0502489				s(time_elapsed_hours):groupiPD	7.72841	8.42881	6.89246	0
groupLRRK2_PD	-17.3423	11.1049	-1.56168	0.119362				s(time_elapsed_hours):groupLRRK2_PD	6.59589	7.51918	4.94708	1.36661e-05
sexMale	5.36477	6.83005	0.785465	0.432768				s(time_elapsed_hours,sample_id_factor)	102.113	216	730.373	0
age_at_draw	-0.085579	0.410714	-0.208366	0.835077
weeks_cryo	18.3367	13.2356	1.3854	0.166904
ancestryNon-Jewish	-13.3666	18.5933	-0.718893	0.472737
plate1	14.7267	7.28834	2.02058	0.0441639
date_of_draw_numeric	2.6356	1.89152	1.39337	0.164483

## Sheet: LMER_Fixed
DQ-BSA										PAIR-WISE SLOPE COMPARISONS
effect	term	estimate	std.error	statistic	df	p.value	conf.low	conf.high			contrast	estimate	SE	df	t.ratio	p.value
fixed	(Intercept)	-103.467	129.029	-0.801888	72.0248	0.42526	-360.681	153.747			Control - GBA_PD	-0.448684	0.186574	1928	-2.40486	0.076476
fixed	groupGBA_PD	32.1251	20.4272	1.57266	73.9139	0.12007	-8.57789	72.8281			Control - iPD	-0.138927	0.190661	1928	-0.72866	0.885631
fixed	groupiPD	12.7733	20.7321	0.616114	73.9408	0.53971	-28.5368	54.0835			Control - LRRK2_PD	-0.950255	0.192973	1928	-4.9243	5.47e-06
fixed	groupLRRK2_PD	20.0133	20.6582	0.96878	74.0037	0.33581	-21.1491	61.1757			GBA_PD - iPD	0.309757	0.184182	1928	1.68179	0.333575
fixed	time_elapsed_hours	-0.822016	0.136452	-6.02421	1928	2.03e-09	-1.08963	-0.554407			GBA_PD - LRRK2_PD	-0.501571	0.186574	1928	-2.68833	0.036398
fixed	age_at_draw	0.736615	0.560063	1.31524	72	0.19260	-0.37985	1.85308			iPD - LRRK2_PD	-0.811328	0.190661	1928	-4.25533	0.000128
fixed	clinicNYUMD	93.9615	31.0885	3.02238	72	0.00347	31.9877	155.935
fixed	weeks_cryo	0.665128	0.443313	1.50036	71.9997	0.13789	-0.2186	1.54886
fixed	ancestryNon-Jewish	-52.5268	24.1943	-2.17104	72	0.03323	-100.757	-4.29625
fixed	ancestrySephardic Jewish	-110.398	55.7388	-1.98062	72	0.05145	-221.511	0.715749
fixed	sexMale	8.41162	12.0846	0.696062	72	0.48863	-15.6786	32.5018
fixed	assay_date_numeric	-0.222893	0.0731774	-3.04592	71.9998	0.00324	-0.368769	-0.0770164
fixed	date_of_draw_numeric	0.0840915	0.0642023	1.30979	71.9997	0.19443	-0.0438933	0.212076
fixed	groupGBA_PD:time_elapsed_hours	0.448684	0.186574	2.40486	1928	0.01627	0.0827761	0.814592
fixed	groupiPD:time_elapsed_hours	0.138927	0.190661	0.72866	1928	0.46630	-0.234997	0.512851
fixed	groupLRRK2_PD:time_elapsed_hours	0.950255	0.192973	4.9243	1928	9.19e-07	0.571798	1.32871
LYSOSENSOR
effect	term	estimate	std.error	statistic	df	p.value	conf.low	conf.high			contrast	estimate	SE	df	t.ratio	p.value
fixed	(Intercept)	-566.65	633.733	-0.894146	15.8982	0.38458	-1910.8	777.504			CTR - GBA_PD	0.0774097	0.0153498	548	5.04306	3.7178e-06
fixed	groupGBA_PD	-1.11692	1.37641	-0.811473	16.5794	0.428591	-4.0265	1.79267			CTR - iPD	0.0759243	0.0153498	548	4.94629	5.99811e-06
fixed	groupiPD	-1.24105	1.51154	-0.821049	16.4837	0.423334	-4.43776	1.95565			CTR - LRRK2_PD	0.134691	0.016099	548	8.36645	4.04995e-10
fixed	groupLRRK2_PD	-0.882921	1.29433	-0.682145	16.7348	0.50448	-3.61702	1.85118			GBA_PD - iPD	-0.00148542	0.0153498	548	-0.0967715	0.999675
fixed	time_elapsed_hours	0.141699	0.0108539	13.0551	548.001	4.14818e-34	0.120379	0.163019			GBA_PD - LRRK2_PD	0.0572814	0.016099	548	3.55808	0.00228947
fixed	weeks_cryo	1.43073	1.59998	0.894219	15.8982	0.384543	-1.96284	4.82431			iPD - LRRK2_PD	0.0587668	0.016099	548	3.65035	0.00163
fixed	plate1	1.4443	0.941356	1.53427	15.9844	0.144516	-0.551445	3.44004
fixed	date_of_draw_numeric	0.205207	0.228771	0.896999	15.8982	0.383102	-0.280018	0.690432
fixed	groupGBA_PD:time_elapsed_hours	-0.0774097	0.0153498	-5.04306	548.001	6.2377e-07	-0.107561	-0.0472582
fixed	groupiPD:time_elapsed_hours	-0.0759243	0.0153498	-4.94629	548.001	1.00757e-06	-0.106076	-0.0457728
fixed	groupLRRK2_PD:time_elapsed_hours	-0.134691	0.016099	-8.36645	548.001	4.95283e-16	-0.166314	-0.103068
TAS2
effect	term	estimate	std.error	statistic	df	p.value	conf.low	conf.high			contrast	estimate	SE	df	t.ratio	p.value
fixed	(Intercept)	-7163.23	5288.48	-1.3545	12.9497	0.19874	-18592.8	4266.34			CTR - GBA_PD	0.711646	0.197801	433	3.59778	0.00202303
fixed	groupGBA_PD	-11.5009	11.0996	-1.03616	13.9575	0.317748	-35.314	12.3121			CTR - iPD	1.21747	0.197801	433	6.155	1.02402e-08
fixed	groupiPD	-9.99069	11.9325	-0.837267	13.8244	0.416683	-35.6139	15.6325			CTR - LRRK2_PD	1.69849	0.207456	433	8.18722	0
fixed	groupLRRK2_PD	0.480554	11.3984	0.04216	14.0032	0.966966	-23.966	24.9271			GBA_PD - iPD	0.505821	0.197801	433	2.55722	0.0529302
fixed	time_elapsed_hours	3.37426	0.139867	24.1248	433	4.00374e-82	3.09936	3.64917			GBA_PD - LRRK2_PD	0.98684	0.207456	433	4.75687	1.59155e-05
fixed	sexMale	5.29571	6.88191	0.769512	13	0.455345	-9.57175	20.1632			iPD - LRRK2_PD	0.481019	0.207456	433	2.31866	0.0953674
fixed	age_at_draw	-0.083655	0.413832	-0.202147	12.997	0.842932	-0.977707	0.810397
fixed	weeks_cryo	18.0704	13.3361	1.355	12.9497	0.198585	-10.7519	46.8927
fixed	ancestryNon-Jewish	-13.1949	18.7345	-0.704311	12.9939	0.493669	-53.6702	27.2804
fixed	plate1	14.507	7.34367	1.97544	12.9934	0.0698515	-1.35889	30.3728
fixed	date_of_draw_numeric	2.59732	1.90588	1.36279	12.9497	0.196178	-1.52171	6.71635
fixed	groupGBA_PD:time_elapsed_hours	-0.711646	0.197801	-3.59778	433	0.000357988	-1.10042	-0.322876
fixed	groupiPD:time_elapsed_hours	-1.21747	0.197801	-6.155	433	1.71274e-09	-1.60624	-0.828697
fixed	groupLRRK2_PD:time_elapsed_hours	-1.69849	0.207456	-8.18722	433	3.0232e-15	-2.10623	-1.29074

## Sheet: Wilcoxon_Subjects
Comparison of subject-level mean rates per group (scaled dF/dt)
DQ-BSA
.y.	group1	group2	n1	n2	statistic	p	p.adj	p.adj.signif
mean_deriv	Control	GBA_PD	20	23	128	0.012000	0.019000	*
mean_deriv	Control	iPD	20	21	261	0.190000	0.212000	ns
mean_deriv	Control	LRRK2_PD	20	20	78	0.000668	0.002000	**
mean_deriv	GBA_PD	iPD	23	21	373	0.002000	0.003000	**
mean_deriv	GBA_PD	LRRK2_PD	23	20	178	0.212000	0.212000	ns
mean_deriv	iPD	LRRK2_PD	21	20	61	4.21e-05	0.000253	***
LYSOSENSOR
.y.	group1	group2	n1	n2	statistic	p	p.adj	p.adj.signif
mean_deriv	CTR	GBA_PD	6	6	20	0.818	1	ns
mean_deriv	CTR	iPD	6	6	18	1	1	ns
mean_deriv	CTR	LRRK2_PD	6	5	20	0.429	1	ns
mean_deriv	GBA_PD	iPD	6	6	18	1	1	ns
mean_deriv	GBA_PD	LRRK2_PD	6	5	25	0.082	0.494	ns
mean_deriv	iPD	LRRK2_PD	6	5	18	0.662	1	ns
TAS2
.y.	group1	group2	n1	n2	statistic	p	p.adj	p.adj.signif
mean_deriv	CTR	GBA_PD	6	6	24	0.394	0.643	ns
mean_deriv	CTR	iPD	6	6	27	0.18	0.54	ns
mean_deriv	CTR	LRRK2_PD	6	5	26	0.052	0.311	ns
mean_deriv	GBA_PD	iPD	6	6	21	0.699	0.792	ns
mean_deriv	GBA_PD	LRRK2_PD	6	5	20	0.429	0.643	ns
mean_deriv	iPD	LRRK2_PD	6	5	17	0.792	0.792	ns

## Sheet: Wilcoxon_Timepoints
PER TIME-POINT RATE COMPARISONS	DQ-BSA	time_elapsed_hours	.y.	group1	group2	n1	n2	statistic	p	p.adj	p.adj.signif		LYSOSENSOR	time_elapsed_hours	.y.	group1	group2	n1	n2	statistic	p	p.adj	p.adj.signif		TAS2	time	.y.	group1	group2	n1	n2	statistic	p	p.adj	p.adj.signif
		1	deriv	Control	GBA_PD	20	23	126	0.01100	0.013	*			0	deriv	CTR	GBA_PD	6	6	10	0.24	0.48	ns			1	deriv	CTR	GBA_PD	6	6	20	0.818	1	ns
		1	deriv	Control	iPD	20	21	337	0.00064	0.001	**			0	deriv	CTR	iPD	6	6	12	0.394	0.515	ns			1	deriv	CTR	iPD	6	6	21	0.699	1	ns
		1	deriv	Control	LRRK2_PD	20	20	105	0.00900	0.013	*			0	deriv	CTR	LRRK2_PD	6	5	10	0.429	0.515	ns			1	deriv	CTR	LRRK2_PD	6	5	18	0.662	1	ns
		1	deriv	GBA_PD	iPD	23	21	441	2.94e-07	1.76e-06	****			0	deriv	GBA_PD	iPD	6	6	26	0.24	0.48	ns			1	deriv	GBA_PD	iPD	6	6	18	1	1	ns
		1	deriv	GBA_PD	LRRK2_PD	23	20	213	0.69100	0.691	ns			0	deriv	GBA_PD	LRRK2_PD	6	5	26	0.052	0.311	ns			1	deriv	GBA_PD	LRRK2_PD	6	5	14	0.931	1	ns
		1	deriv	iPD	LRRK2_PD	21	20	36	7.05e-07	2.12e-06	****			0	deriv	iPD	LRRK2_PD	6	5	13	0.792	0.792	ns			1	deriv	iPD	LRRK2_PD	6	5	17	0.792	1	ns
		2	deriv	Control	GBA_PD	20	23	142	0.032	0.039	*			1	deriv	CTR	GBA_PD	6	6	11	0.31	0.515	ns			2	deriv	CTR	GBA_PD	6	6	23	0.485	0.937	ns
		2	deriv	Control	iPD	20	21	323	0.003	0.005	**			1	deriv	CTR	iPD	6	6	12	0.394	0.515	ns			2	deriv	CTR	iPD	6	6	24	0.394	0.937	ns
		2	deriv	Control	LRRK2_PD	20	20	115	0.021	0.032	*			1	deriv	CTR	LRRK2_PD	6	5	10	0.429	0.515	ns			2	deriv	CTR	LRRK2_PD	6	5	22	0.247	0.937	ns
		2	deriv	GBA_PD	iPD	23	21	422	6.14e-06	2.87e-05	****			1	deriv	GBA_PD	iPD	6	6	26	0.24	0.515	ns			2	deriv	GBA_PD	iPD	6	6	19	0.937	0.937	ns
		2	deriv	GBA_PD	LRRK2_PD	23	20	215	0.727	0.727	ns			1	deriv	GBA_PD	LRRK2_PD	6	5	27	0.03	0.182	ns			2	deriv	GBA_PD	LRRK2_PD	6	5	17	0.792	0.937	ns
		2	deriv	iPD	LRRK2_PD	21	20	51	9.58e-06	2.87e-05	****			1	deriv	iPD	LRRK2_PD	6	5	13	0.792	0.792	ns			2	deriv	iPD	LRRK2_PD	6	5	18	0.662	0.937	ns
		3	deriv	Control	GBA_PD	20	23	182	0.250	0.300	ns			2	deriv	CTR	GBA_PD	6	6	16	0.818	0.982	ns			3	deriv	CTR	GBA_PD	6	6	25	0.31	0.494	ns
		3	deriv	Control	iPD	20	21	277	0.083	0.145	ns			2	deriv	CTR	iPD	6	6	16	0.818	0.982	ns			3	deriv	CTR	iPD	6	6	27	0.18	0.494	ns
		3	deriv	Control	LRRK2_PD	20	20	138	0.096	0.145	ns			2	deriv	CTR	LRRK2_PD	6	5	15	1	1	ns			3	deriv	CTR	LRRK2_PD	6	5	27	0.03	0.182	ns
		3	deriv	GBA_PD	iPD	23	21	364	0.003	0.010	*			2	deriv	GBA_PD	iPD	6	6	26	0.24	0.72	ns			3	deriv	GBA_PD	iPD	6	6	20	0.818	0.818	ns
		3	deriv	GBA_PD	LRRK2_PD	23	20	220	0.819	0.819	ns			2	deriv	GBA_PD	LRRK2_PD	6	5	27	0.03	0.182	ns			3	deriv	GBA_PD	LRRK2_PD	6	5	21	0.329	0.494	ns
		3	deriv	iPD	LRRK2_PD	21	20	92	0.002	0.010	**			2	deriv	iPD	LRRK2_PD	6	5	13	0.792	0.982	ns			3	deriv	iPD	LRRK2_PD	6	5	19	0.537	0.644	ns
		4	deriv	Control	GBA_PD	20	23	231	0.990	0.99	ns			3	deriv	CTR	GBA_PD	6	6	32	0.026	0.052	ns			4	deriv	CTR	GBA_PD	6	6	27	0.18	0.36	ns
		4	deriv	Control	iPD	20	21	220	0.806	0.99	ns			3	deriv	CTR	iPD	6	6	30	0.065	0.097	ns			4	deriv	CTR	iPD	6	6	28	0.132	0.36	ns
		4	deriv	Control	LRRK2_PD	20	20	182	0.640	0.99	ns			3	deriv	CTR	LRRK2_PD	6	5	30	0.004	0.026	*			4	deriv	CTR	LRRK2_PD	6	5	27	0.03	0.182	ns
		4	deriv	GBA_PD	iPD	23	21	264	0.609	0.99	ns			3	deriv	GBA_PD	iPD	6	6	26	0.24	0.288	ns			4	deriv	GBA_PD	iPD	6	6	22	0.589	0.662	ns
		4	deriv	GBA_PD	LRRK2_PD	23	20	223	0.876	0.99	ns			3	deriv	GBA_PD	LRRK2_PD	6	5	28	0.017	0.052	ns			4	deriv	GBA_PD	LRRK2_PD	6	5	22	0.247	0.37	ns
		4	deriv	iPD	LRRK2_PD	21	20	184	0.510	0.99	ns			3	deriv	iPD	LRRK2_PD	6	5	13	0.792	0.792	ns			4	deriv	iPD	LRRK2_PD	6	5	18	0.662	0.662	ns
		5	deriv	Control	GBA_PD	20	23	261	0.462	0.872	ns			4	deriv	CTR	GBA_PD	6	6	32	0.026	0.045	*			5	deriv	CTR	GBA_PD	6	6	26	0.24	0.37	ns
		5	deriv	Control	iPD	20	21	186	0.544	0.872	ns			4	deriv	CTR	iPD	6	6	36	0.002	0.013	*			5	deriv	CTR	iPD	6	6	28	0.132	0.37	ns
		5	deriv	Control	LRRK2_PD	20	20	204	0.925	0.925	ns			4	deriv	CTR	LRRK2_PD	6	5	30	0.004	0.013	*			5	deriv	CTR	LRRK2_PD	6	5	27	0.03	0.182	ns
		5	deriv	GBA_PD	iPD	23	21	191	0.243	0.872	ns			4	deriv	GBA_PD	iPD	6	6	25	0.31	0.372	ns			5	deriv	GBA_PD	iPD	6	6	24	0.394	0.473	ns
		5	deriv	GBA_PD	LRRK2_PD	23	20	215	0.727	0.872	ns			4	deriv	GBA_PD	LRRK2_PD	6	5	27	0.03	0.045	*			5	deriv	GBA_PD	LRRK2_PD	6	5	22	0.247	0.37	ns
		5	deriv	iPD	LRRK2_PD	21	20	229	0.633	0.872	ns			4	deriv	iPD	LRRK2_PD	6	5	16	0.931	0.931	ns			5	deriv	iPD	LRRK2_PD	6	5	15	1	1	ns
		6	deriv	Control	GBA_PD	20	23	273	0.304	0.608	ns			5	deriv	CTR	GBA_PD	6	6	32	0.026	0.052	ns			6	deriv	CTR	GBA_PD	6	6	24	0.394	0.728	ns
		6	deriv	Control	iPD	20	21	180	0.446	0.669	ns			5	deriv	CTR	iPD	6	6	36	0.002	0.013	*			6	deriv	CTR	iPD	6	6	27	0.18	0.54	ns
		6	deriv	Control	LRRK2_PD	20	20	189	0.779	0.887	ns			5	deriv	CTR	LRRK2_PD	6	5	30	0.004	0.013	*			6	deriv	CTR	LRRK2_PD	6	5	26	0.052	0.311	ns
		6	deriv	GBA_PD	iPD	23	21	188	0.215	0.608	ns			5	deriv	GBA_PD	iPD	6	6	17	0.937	0.937	ns			6	deriv	GBA_PD	iPD	6	6	23	0.485	0.728	ns
		6	deriv	GBA_PD	LRRK2_PD	23	20	181	0.240	0.608	ns			5	deriv	GBA_PD	LRRK2_PD	6	5	22	0.247	0.37	ns			6	deriv	GBA_PD	LRRK2_PD	6	5	17	0.792	0.792	ns
		6	deriv	iPD	LRRK2_PD	21	20	216	0.887	0.887	ns			5	deriv	iPD	LRRK2_PD	6	5	18	0.662	0.794	ns			6	deriv	iPD	LRRK2_PD	6	5	13	0.792	0.792	ns
		7	deriv	Control	GBA_PD	20	23	241	0.800000	0.800	ns			6	deriv	CTR	GBA_PD	6	6	32	0.026	0.078	ns			7	deriv	CTR	GBA_PD	6	6	25	0.31	0.62	ns
		7	deriv	Control	iPD	20	21	244	0.386000	0.579	ns			6	deriv	CTR	iPD	6	6	28	0.132	0.264	ns			7	deriv	CTR	iPD	6	6	26	0.24	0.62	ns
		7	deriv	Control	LRRK2_PD	20	20	95	0.004000	0.012	*			6	deriv	CTR	LRRK2_PD	6	5	30	0.004	0.026	*			7	deriv	CTR	LRRK2_PD	6	5	26	0.052	0.311	ns
		7	deriv	GBA_PD	iPD	23	21	259	0.692000	0.800	ns			6	deriv	GBA_PD	iPD	6	6	14	0.589	0.662	ns			7	deriv	GBA_PD	iPD	6	6	20	0.818	0.818	ns
		7	deriv	GBA_PD	LRRK2_PD	23	20	119	0.006000	0.012	*			6	deriv	GBA_PD	LRRK2_PD	6	5	18	0.662	0.662	ns			7	deriv	GBA_PD	LRRK2_PD	6	5	17	0.792	0.818	ns
		7	deriv	iPD	LRRK2_PD	21	20	76	0.000289	0.002	**			6	deriv	iPD	LRRK2_PD	6	5	22	0.247	0.37	ns			7	deriv	iPD	LRRK2_PD	6	5	13	0.792	0.818	ns
		8	deriv	Control	GBA_PD	20	23	206	0.571	0.571	ns			7	deriv	CTR	GBA_PD	6	6	21	0.699	0.839	ns			8	deriv	CTR	GBA_PD	6	6	25	0.31	0.62	ns
		8	deriv	Control	iPD	20	21	268	0.135	0.162	ns			7	deriv	CTR	iPD	6	6	17	0.937	0.937	ns			8	deriv	CTR	iPD	6	6	26	0.24	0.62	ns
		8	deriv	Control	LRRK2_PD	20	20	87	0.002	0.005	**			7	deriv	CTR	LRRK2_PD	6	5	20	0.429	0.839	ns			8	deriv	CTR	LRRK2_PD	6	5	26	0.052	0.311	ns
		8	deriv	GBA_PD	iPD	23	21	324	0.053	0.080	ns			7	deriv	GBA_PD	iPD	6	6	12	0.394	0.839	ns			8	deriv	GBA_PD	iPD	6	6	19	0.937	0.937	ns
		8	deriv	GBA_PD	LRRK2_PD	23	20	130	0.014	0.029	*			7	deriv	GBA_PD	LRRK2_PD	6	5	18	0.662	0.839	ns			8	deriv	GBA_PD	LRRK2_PD	6	5	19	0.537	0.806	ns
		8	deriv	iPD	LRRK2_PD	21	20	48	5.93e-06	3.56e-05	****			7	deriv	iPD	LRRK2_PD	6	5	24	0.126	0.756	ns			8	deriv	iPD	LRRK2_PD	6	5	17	0.792	0.937	ns
		9	deriv	Control	GBA_PD	20	23	209	0.621	0.745	ns			8	deriv	CTR	GBA_PD	6	6	13	0.485	0.589	ns			9	deriv	CTR	GBA_PD	6	6	25	0.31	0.465	ns
		9	deriv	Control	iPD	20	21	211	0.990	0.990	ns			8	deriv	CTR	iPD	6	6	12	0.394	0.589	ns			9	deriv	CTR	iPD	6	6	26	0.24	0.465	ns
		9	deriv	Control	LRRK2_PD	20	20	150	0.183	0.549	ns			8	deriv	CTR	LRRK2_PD	6	5	11	0.537	0.589	ns			9	deriv	CTR	LRRK2_PD	6	5	26	0.052	0.311	ns
		9	deriv	GBA_PD	iPD	23	21	264	0.609	0.745	ns			8	deriv	GBA_PD	iPD	6	6	14	0.589	0.589	ns			9	deriv	GBA_PD	iPD	6	6	21	0.699	0.699	ns
		9	deriv	GBA_PD	LRRK2_PD	23	20	187	0.304	0.608	ns			8	deriv	GBA_PD	LRRK2_PD	6	5	21	0.329	0.589	ns			9	deriv	GBA_PD	LRRK2_PD	6	5	23	0.177	0.465	ns
		9	deriv	iPD	LRRK2_PD	21	20	153	0.142	0.549	ns			8	deriv	iPD	LRRK2_PD	6	5	24	0.126	0.589	ns			9	deriv	iPD	LRRK2_PD	6	5	20	0.429	0.515	ns
		10	deriv	Control	GBA_PD	20	23	208	0.604	0.814	ns			9	deriv	CTR	GBA_PD	6	6	12	0.394	0.591	ns			10	deriv	CTR	GBA_PD	6	6	23	0.485	0.662	ns
		10	deriv	Control	iPD	20	21	166	0.260	0.814	ns			9	deriv	CTR	iPD	6	6	10	0.24	0.48	ns			10	deriv	CTR	iPD	6	6	27	0.18	0.36	ns
		10	deriv	Control	LRRK2_PD	20	20	184	0.678	0.814	ns			9	deriv	CTR	LRRK2_PD	6	5	12	0.662	0.794	ns			10	deriv	CTR	LRRK2_PD	6	5	26	0.052	0.311	ns
		10	deriv	GBA_PD	iPD	23	21	211	0.485	0.814	ns			9	deriv	GBA_PD	iPD	6	6	17	0.937	0.937	ns			10	deriv	GBA_PD	iPD	6	6	22	0.589	0.662	ns
		10	deriv	GBA_PD	LRRK2_PD	23	20	235	0.914	0.914	ns			9	deriv	GBA_PD	LRRK2_PD	6	5	24	0.126	0.378	ns			10	deriv	GBA_PD	LRRK2_PD	6	5	23	0.177	0.36	ns
		10	deriv	iPD	LRRK2_PD	21	20	235	0.527	0.814	ns			9	deriv	iPD	LRRK2_PD	6	5	25	0.082	0.378	ns			10	deriv	iPD	LRRK2_PD	6	5	18	0.662	0.662	ns
		11	deriv	Control	GBA_PD	20	23	183	0.260	0.520	ns			10	deriv	CTR	GBA_PD	6	6	18	1	1	ns			11	deriv	CTR	GBA_PD	6	6	23	0.485	0.707	ns
		11	deriv	Control	iPD	20	21	151	0.128	0.520	ns			10	deriv	CTR	iPD	6	6	13	0.485	0.97	ns			11	deriv	CTR	iPD	6	6	27	0.18	0.36	ns
		11	deriv	Control	LRRK2_PD	20	20	183	0.659	0.659	ns			10	deriv	CTR	LRRK2_PD	6	5	18	0.662	0.982	ns			11	deriv	CTR	LRRK2_PD	6	5	26	0.052	0.311	ns
		11	deriv	GBA_PD	iPD	23	21	215	0.545	0.654	ns			10	deriv	GBA_PD	iPD	6	6	20	0.818	0.982	ns			11	deriv	GBA_PD	iPD	6	6	22	0.589	0.707	ns
		11	deriv	GBA_PD	LRRK2_PD	23	20	258	0.507	0.654	ns			10	deriv	GBA_PD	LRRK2_PD	6	5	26	0.052	0.156	ns			11	deriv	GBA_PD	LRRK2_PD	6	5	23	0.177	0.36	ns
		11	deriv	iPD	LRRK2_PD	21	20	255	0.249	0.520	ns			10	deriv	iPD	LRRK2_PD	6	5	26	0.052	0.156	ns			11	deriv	iPD	LRRK2_PD	6	5	16	0.931	0.931	ns
		12	deriv	Control	GBA_PD	20	23	164	0.111	0.654	ns			11	deriv	CTR	GBA_PD	6	6	15	0.699	0.699	ns			12	deriv	CTR	GBA_PD	6	6	25	0.31	0.62	ns
		12	deriv	Control	iPD	20	21	162	0.218	0.654	ns			11	deriv	CTR	iPD	6	6	12	0.394	0.699	ns			12	deriv	CTR	iPD	6	6	28	0.132	0.396	ns
		12	deriv	Control	LRRK2_PD	20	20	168	0.398	0.670	ns			11	deriv	CTR	LRRK2_PD	6	5	18	0.662	0.699	ns			12	deriv	CTR	LRRK2_PD	6	5	26	0.052	0.311	ns
		12	deriv	GBA_PD	iPD	23	21	260	0.675	0.728	ns			11	deriv	GBA_PD	iPD	6	6	21	0.699	0.699	ns			12	deriv	GBA_PD	iPD	6	6	20	0.818	0.818	ns
		12	deriv	GBA_PD	LRRK2_PD	23	20	262	0.447	0.670	ns			11	deriv	GBA_PD	LRRK2_PD	6	5	26	0.052	0.156	ns			12	deriv	GBA_PD	LRRK2_PD	6	5	20	0.429	0.643	ns
		12	deriv	iPD	LRRK2_PD	21	20	224	0.728	0.728	ns			11	deriv	iPD	LRRK2_PD	6	5	26	0.052	0.156	ns			12	deriv	iPD	LRRK2_PD	6	5	18	0.662	0.794	ns
		13	deriv	Control	GBA_PD	20	23	177	0.203	0.406	ns			12	deriv	CTR	GBA_PD	6	6	12	0.394	0.591	ns			13	deriv	CTR	GBA_PD	6	6	26	0.24	0.48	ns
		13	deriv	Control	iPD	20	21	181	0.461	0.553	ns			12	deriv	CTR	iPD	6	6	9	0.18	0.36	ns			13	deriv	CTR	iPD	6	6	28	0.132	0.396	ns
		13	deriv	Control	LRRK2_PD	20	20	144	0.134	0.406	ns			12	deriv	CTR	LRRK2_PD	6	5	14	0.931	0.931	ns			13	deriv	CTR	LRRK2_PD	6	5	26	0.052	0.311	ns
		13	deriv	GBA_PD	iPD	23	21	280	0.376	0.553	ns			12	deriv	GBA_PD	iPD	6	6	21	0.699	0.839	ns			13	deriv	GBA_PD	iPD	6	6	20	0.818	0.818	ns
		13	deriv	GBA_PD	LRRK2_PD	23	20	211	0.656	0.656	ns			12	deriv	GBA_PD	LRRK2_PD	6	5	26	0.052	0.156	ns			13	deriv	GBA_PD	LRRK2_PD	6	5	21	0.329	0.494	ns
		13	deriv	iPD	LRRK2_PD	21	20	156	0.165	0.406	ns			12	deriv	iPD	LRRK2_PD	6	5	26	0.052	0.156	ns			13	deriv	iPD	LRRK2_PD	6	5	20	0.429	0.515	ns
		14	deriv	Control	GBA_PD	20	23	237	0.876	0.876	ns			13	deriv	CTR	GBA_PD	6	6	14	0.589	0.883	ns			14	deriv	CTR	GBA_PD	6	6	24	0.394	0.473	ns
		14	deriv	Control	iPD	20	21	188	0.579	0.695	ns			13	deriv	CTR	iPD	6	6	13	0.485	0.883	ns			14	deriv	CTR	iPD	6	6	28	0.132	0.354	ns
		14	deriv	Control	LRRK2_PD	20	20	109	0.013	0.046	*			13	deriv	CTR	LRRK2_PD	6	5	16	0.931	0.937	ns			14	deriv	CTR	LRRK2_PD	6	5	26	0.052	0.311	ns
		14	deriv	GBA_PD	iPD	23	21	208	0.442	0.663	ns			13	deriv	GBA_PD	iPD	6	6	19	0.937	0.937	ns			14	deriv	GBA_PD	iPD	6	6	22	0.589	0.589	ns
		14	deriv	GBA_PD	LRRK2_PD	23	20	132	0.016	0.046	*			13	deriv	GBA_PD	LRRK2_PD	6	5	26	0.052	0.156	ns			14	deriv	GBA_PD	LRRK2_PD	6	5	23	0.177	0.354	ns
		14	deriv	iPD	LRRK2_PD	21	20	123	0.023	0.046	*			13	deriv	iPD	LRRK2_PD	6	5	26	0.052	0.156	ns			14	deriv	iPD	LRRK2_PD	6	5	21	0.329	0.473	ns
		15	deriv	Control	GBA_PD	20	23	335	0.010000	0.014	*			14	deriv	CTR	GBA_PD	6	6	21	0.699	0.839	ns			15	deriv	CTR	GBA_PD	6	6	24	0.394	0.473	ns
		15	deriv	Control	iPD	20	21	114	0.012000	0.014	*			14	deriv	CTR	iPD	6	6	23	0.485	0.728	ns			15	deriv	CTR	iPD	6	6	29	0.093	0.252	ns
		15	deriv	Control	LRRK2_PD	20	20	92	0.003000	0.006	**			14	deriv	CTR	LRRK2_PD	6	5	24	0.126	0.494	ns			15	deriv	CTR	LRRK2_PD	6	5	27	0.03	0.182	ns
		15	deriv	GBA_PD	iPD	23	21	89	0.000201	0.001	**			14	deriv	GBA_PD	iPD	6	6	19	0.937	0.937	ns			15	deriv	GBA_PD	iPD	6	6	22	0.589	0.589	ns
		15	deriv	GBA_PD	LRRK2_PD	23	20	100	0.001000	0.004	**			14	deriv	GBA_PD	LRRK2_PD	6	5	22	0.247	0.494	ns			15	deriv	GBA_PD	LRRK2_PD	6	5	24	0.126	0.252	ns
		15	deriv	iPD	LRRK2_PD	21	20	159	0.190000	0.190	ns			14	deriv	iPD	LRRK2_PD	6	5	22	0.247	0.494	ns			15	deriv	iPD	LRRK2_PD	6	5	21	0.329	0.473	ns
		16	deriv	Control	GBA_PD	20	23	235	0.914	0.914	ns			15	deriv	CTR	GBA_PD	6	6	27	0.18	0.36	ns			16	deriv	CTR	GBA_PD	6	6	25	0.31	0.494	ns
		16	deriv	Control	iPD	20	21	97	0.003	0.016	*			15	deriv	CTR	iPD	6	6	28	0.132	0.36	ns			16	deriv	CTR	iPD	6	6	29	0.093	0.279	ns
		16	deriv	Control	LRRK2_PD	20	20	113	0.018	0.036	*			15	deriv	CTR	LRRK2_PD	6	5	25	0.082	0.36	ns			16	deriv	CTR	LRRK2_PD	6	5	27	0.03	0.182	ns
		16	deriv	GBA_PD	iPD	23	21	139	0.016	0.036	*			15	deriv	GBA_PD	iPD	6	6	20	0.818	0.818	ns			16	deriv	GBA_PD	iPD	6	6	19	0.937	0.937	ns
		16	deriv	GBA_PD	LRRK2_PD	23	20	143	0.034	0.051	ns			15	deriv	GBA_PD	LRRK2_PD	6	5	20	0.429	0.515	ns			16	deriv	GBA_PD	LRRK2_PD	6	5	19	0.537	0.644	ns
		16	deriv	iPD	LRRK2_PD	21	20	215	0.908	0.914	ns			15	deriv	iPD	LRRK2_PD	6	5	21	0.329	0.494	ns			16	deriv	iPD	LRRK2_PD	6	5	21	0.329	0.494	ns
		17	deriv	Control	GBA_PD	20	23	130	0.014	0.057	ns			16	deriv	CTR	GBA_PD	6	6	27	0.18	0.36	ns			17	deriv	CTR	GBA_PD	6	6	29	0.093	0.186	ns
		17	deriv	Control	iPD	20	21	125	0.026	0.057	ns			16	deriv	CTR	iPD	6	6	30	0.065	0.247	ns			17	deriv	CTR	iPD	6	6	31	0.041	0.123	ns
		17	deriv	Control	LRRK2_PD	20	20	119	0.028	0.057	ns			16	deriv	CTR	LRRK2_PD	6	5	25	0.082	0.247	ns			17	deriv	CTR	LRRK2_PD	6	5	28	0.017	0.104	ns
		17	deriv	GBA_PD	iPD	23	21	256	0.745	0.916	ns			16	deriv	GBA_PD	iPD	6	6	19	0.937	0.937	ns			17	deriv	GBA_PD	iPD	6	6	17	0.937	0.937	ns
		17	deriv	GBA_PD	LRRK2_PD	23	20	243	0.763	0.916	ns			16	deriv	GBA_PD	LRRK2_PD	6	5	19	0.537	0.794	ns			17	deriv	GBA_PD	LRRK2_PD	6	5	18	0.662	0.794	ns
		17	deriv	iPD	LRRK2_PD	21	20	208	0.969	0.969	ns			16	deriv	iPD	LRRK2_PD	6	5	18	0.662	0.794	ns			17	deriv	iPD	LRRK2_PD	6	5	19	0.537	0.794	ns
		18	deriv	Control	GBA_PD	20	23	100	0.001	0.007	**			17	deriv	CTR	GBA_PD	6	6	24	0.394	0.788	ns			18	deriv	CTR	GBA_PD	6	6	28	0.132	0.264	ns
		18	deriv	Control	iPD	20	21	153	0.142	0.213	ns			17	deriv	CTR	iPD	6	6	25	0.31	0.788	ns			18	deriv	CTR	iPD	6	6	30	0.065	0.195	ns
		18	deriv	Control	LRRK2_PD	20	20	166	0.369	0.443	ns			17	deriv	CTR	LRRK2_PD	6	5	22	0.247	0.788	ns			18	deriv	CTR	LRRK2_PD	6	5	27	0.03	0.182	ns
		18	deriv	GBA_PD	iPD	23	21	334	0.030	0.082	ns			17	deriv	GBA_PD	iPD	6	6	18	1	1	ns			18	deriv	GBA_PD	iPD	6	6	17	0.937	0.937	ns
		18	deriv	GBA_PD	LRRK2_PD	23	20	314	0.041	0.082	ns			17	deriv	GBA_PD	LRRK2_PD	6	5	16	0.931	1	ns			18	deriv	GBA_PD	LRRK2_PD	6	5	17	0.792	0.937	ns
		18	deriv	iPD	LRRK2_PD	21	20	225	0.708	0.708	ns			17	deriv	iPD	LRRK2_PD	6	5	16	0.931	1	ns			18	deriv	iPD	LRRK2_PD	6	5	19	0.537	0.806	ns
		19	deriv	Control	GBA_PD	20	23	169	0.142	0.213	ns			18	deriv	CTR	GBA_PD	6	6	13	0.485	0.883	ns			19	deriv	CTR	GBA_PD	6	6	24	0.394	0.643	ns
		19	deriv	Control	iPD	20	21	172	0.332	0.398	ns			18	deriv	CTR	iPD	6	6	10	0.24	0.883	ns			19	deriv	CTR	iPD	6	6	26	0.24	0.643	ns
		19	deriv	Control	LRRK2_PD	20	20	272	0.052	0.105	ns			18	deriv	CTR	LRRK2_PD	6	5	9	0.329	0.883	ns			19	deriv	CTR	LRRK2_PD	6	5	27	0.03	0.182	ns
		19	deriv	GBA_PD	iPD	23	21	274	0.456	0.456	ns			18	deriv	GBA_PD	iPD	6	6	22	0.589	0.883	ns			19	deriv	GBA_PD	iPD	6	6	21	0.699	0.699	ns
		19	deriv	GBA_PD	LRRK2_PD	23	20	329	0.015	0.074	ns			18	deriv	GBA_PD	LRRK2_PD	6	5	16	0.931	1	ns			19	deriv	GBA_PD	LRRK2_PD	6	5	20	0.429	0.643	ns
		19	deriv	iPD	LRRK2_PD	21	20	296	0.025	0.074	ns			18	deriv	iPD	LRRK2_PD	6	5	15	1	1	ns			19	deriv	iPD	LRRK2_PD	6	5	19	0.537	0.644	ns
		20	deriv	Control	GBA_PD	20	23	314	0.041000	0.049000	*			19	deriv	CTR	GBA_PD	6	6	9	0.18	0.48	ns			20	deriv	CTR	GBA_PD	6	6	21	0.699	0.699	ns
		20	deriv	Control	iPD	20	21	175	0.372000	0.372000	ns			19	deriv	CTR	iPD	6	6	10	0.24	0.48	ns			20	deriv	CTR	iPD	6	6	26	0.24	0.48	ns
		20	deriv	Control	LRRK2_PD	20	20	331	0.000228	0.000684	***			19	deriv	CTR	LRRK2_PD	6	5	7	0.177	0.48	ns			20	deriv	CTR	LRRK2_PD	6	5	25	0.082	0.48	ns
		20	deriv	GBA_PD	iPD	23	21	130	0.008000	0.016000	*			19	deriv	GBA_PD	iPD	6	6	22	0.589	0.707	ns			20	deriv	GBA_PD	iPD	6	6	22	0.589	0.699	ns
		20	deriv	GBA_PD	LRRK2_PD	23	20	323	0.023000	0.035000	*			19	deriv	GBA_PD	LRRK2_PD	6	5	19	0.537	0.707	ns			20	deriv	GBA_PD	LRRK2_PD	6	5	23	0.177	0.48	ns
		20	deriv	iPD	LRRK2_PD	21	20	350	0.000139	0.000684	***			19	deriv	iPD	LRRK2_PD	6	5	15	1	1	ns			20	deriv	iPD	LRRK2_PD	6	5	19	0.537	0.699	ns
		21	deriv	Control	GBA_PD	20	23	309	0.055	0.166	ns			20	deriv	CTR	GBA_PD	6	6	9	0.18	0.494	ns
		21	deriv	Control	iPD	20	21	170	0.306	0.459	ns			20	deriv	CTR	iPD	6	6	8	0.132	0.494	ns
		21	deriv	Control	LRRK2_PD	20	20	230	0.429	0.492	ns			20	deriv	CTR	LRRK2_PD	6	5	9	0.329	0.494	ns
		21	deriv	GBA_PD	iPD	23	21	122	0.004	0.026	*			20	deriv	GBA_PD	iPD	6	6	21	0.699	0.839	ns
		21	deriv	GBA_PD	LRRK2_PD	23	20	201	0.492	0.492	ns			20	deriv	GBA_PD	LRRK2_PD	6	5	21	0.329	0.494	ns
		21	deriv	iPD	LRRK2_PD	21	20	272	0.109	0.218	ns			20	deriv	iPD	LRRK2_PD	6	5	16	0.931	0.931	ns
		22	deriv	Control	GBA_PD	20	23	201	0.492	0.590	ns			21	deriv	CTR	GBA_PD	6	6	11	0.31	0.515	ns
		22	deriv	Control	iPD	20	21	170	0.306	0.459	ns			21	deriv	CTR	iPD	6	6	10	0.24	0.515	ns
		22	deriv	Control	LRRK2_PD	20	20	88	0.002	0.012	*			21	deriv	CTR	LRRK2_PD	6	5	9	0.329	0.515	ns
		22	deriv	GBA_PD	iPD	23	21	232	0.834	0.834	ns			21	deriv	GBA_PD	iPD	6	6	17	0.937	0.937	ns
		22	deriv	GBA_PD	LRRK2_PD	23	20	119	0.006	0.018	*			21	deriv	GBA_PD	LRRK2_PD	6	5	20	0.429	0.515	ns
		22	deriv	iPD	LRRK2_PD	21	20	111	0.009	0.018	*			21	deriv	iPD	LRRK2_PD	6	5	20	0.429	0.515	ns
		23	deriv	Control	GBA_PD	20	23	107	0.002	0.003000	**			22	deriv	CTR	GBA_PD	6	6	15	0.699	0.839	ns
		23	deriv	Control	iPD	20	21	182	0.477	0.477000	ns			22	deriv	CTR	iPD	6	6	11	0.31	0.839	ns
		23	deriv	Control	LRRK2_PD	20	20	56	3.90e-05	0.000191	***			22	deriv	CTR	LRRK2_PD	6	5	15	1	1	ns
		23	deriv	GBA_PD	iPD	23	21	341	0.019	0.023000	*			22	deriv	GBA_PD	iPD	6	6	15	0.699	0.839	ns
		23	deriv	GBA_PD	LRRK2_PD	23	20	106	0.002	0.003000	**			22	deriv	GBA_PD	LRRK2_PD	6	5	19	0.537	0.839	ns
		23	deriv	iPD	LRRK2_PD	21	20	64	6.36e-05	0.000191	***			22	deriv	iPD	LRRK2_PD	6	5	21	0.329	0.839	ns
		24	deriv	Control	GBA_PD	20	23	94	0.000654	0.001	**			23	deriv	CTR	GBA_PD	6	6	17	0.937	0.937	ns
		24	deriv	Control	iPD	20	21	187	0.561000	0.561	ns			23	deriv	CTR	iPD	6	6	11	0.31	0.937	ns
		24	deriv	Control	LRRK2_PD	20	20	45	6.91e-06	2.45e-05	****			23	deriv	CTR	LRRK2_PD	6	5	14	0.931	0.937	ns
		24	deriv	GBA_PD	iPD	23	21	364	0.003000	0.004	**			23	deriv	GBA_PD	iPD	6	6	13	0.485	0.937	ns
		24	deriv	GBA_PD	LRRK2_PD	23	20	103	0.002000	0.002	**			23	deriv	GBA_PD	LRRK2_PD	6	5	17	0.792	0.937	ns
		24	deriv	iPD	LRRK2_PD	21	20	50	8.18e-06	2.45e-05	****			23	deriv	iPD	LRRK2_PD	6	5	21	0.329	0.937	ns
														24	deriv	CTR	GBA_PD	6	6	17	0.937	0.937	ns
														24	deriv	CTR	iPD	6	6	10	0.24	0.788	ns
														24	deriv	CTR	LRRK2_PD	6	5	14	0.931	0.937	ns
														24	deriv	GBA_PD	iPD	6	6	12	0.394	0.788	ns
														24	deriv	GBA_PD	LRRK2_PD	6	5	17	0.792	0.937	ns
														24	deriv	iPD	LRRK2_PD	6	5	21	0.329	0.788	ns
